# Supplementary material for: The tobacco genome sequence and its comparison with those of tomato and potato
Source: PubMed Central journal article supplement (PMC4024737; doi:10.1038/ncomms4833), 2014-05-08

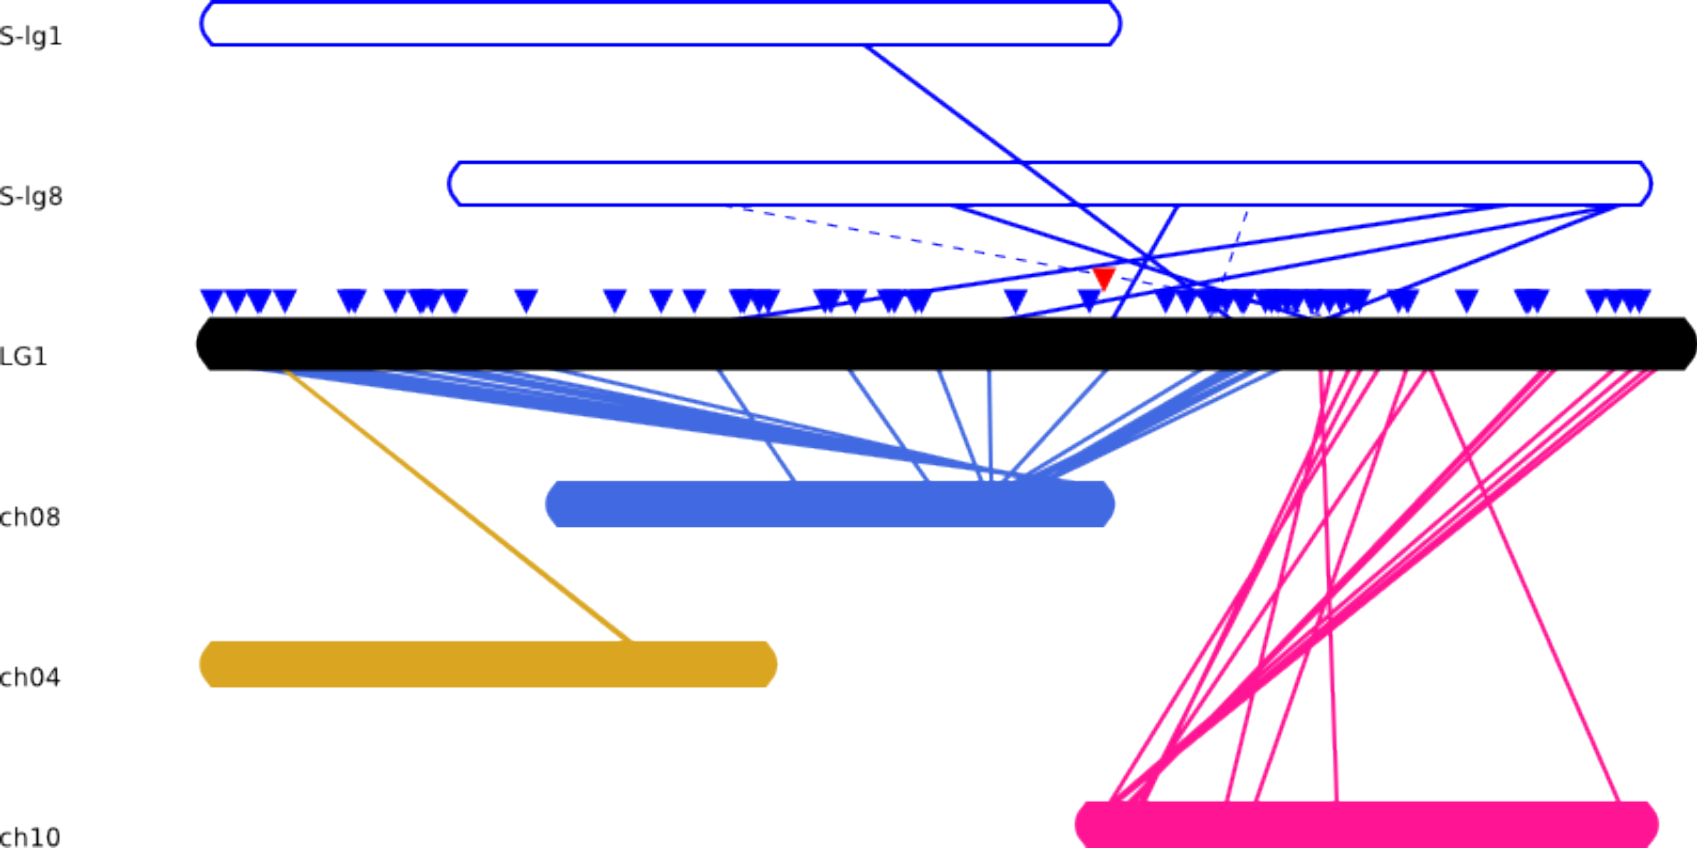

S-Ig7

T-Ig7

LG2

ch07

ch09

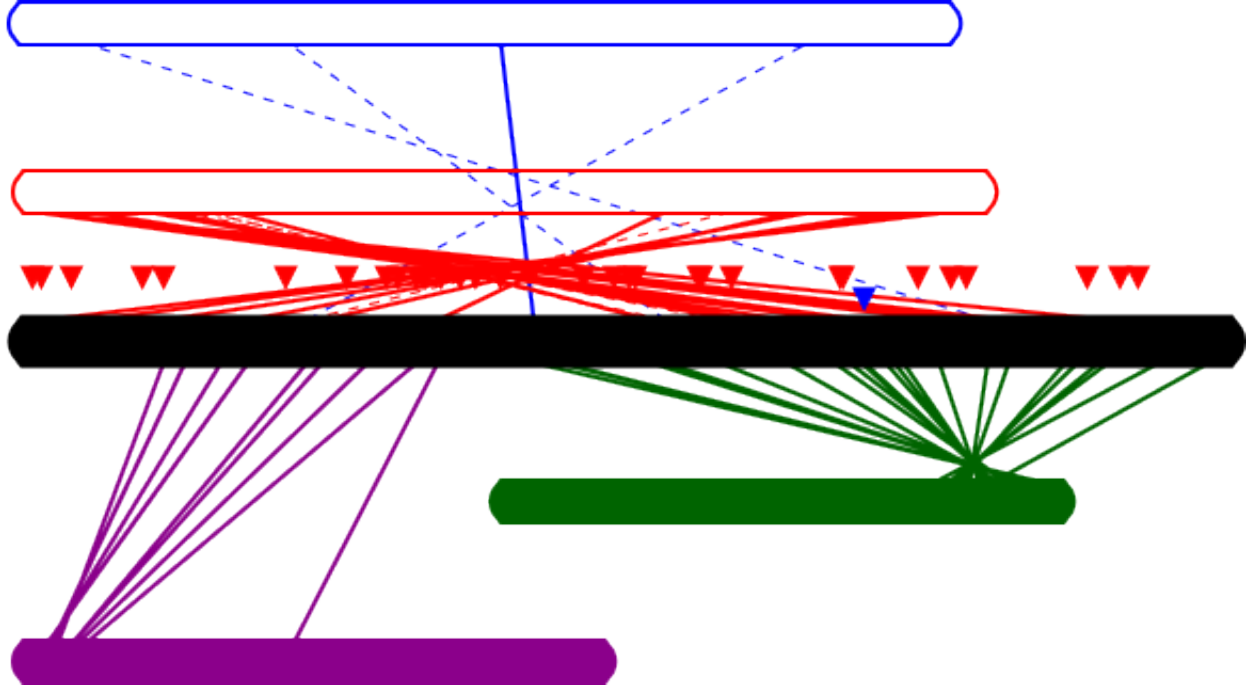

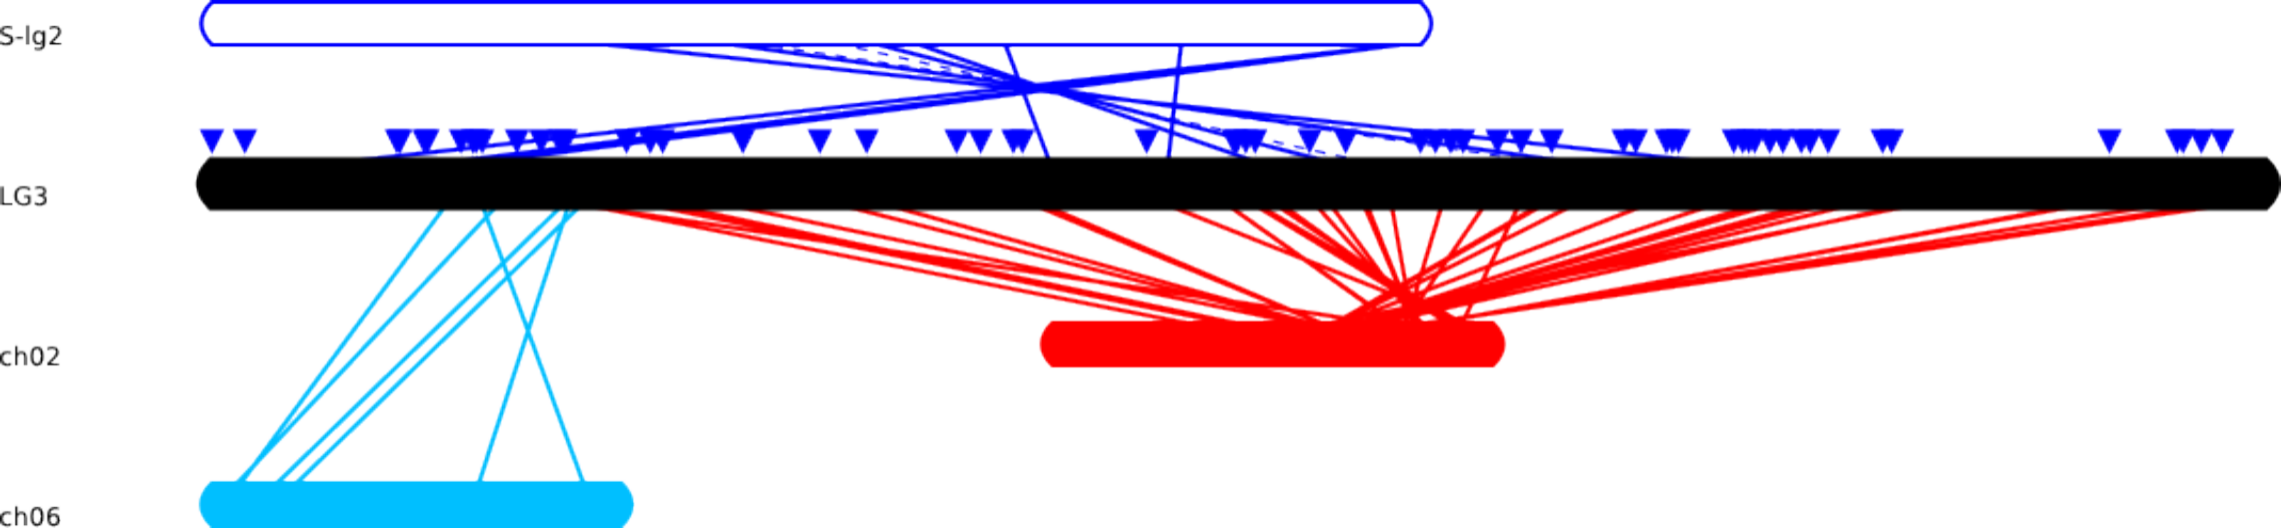

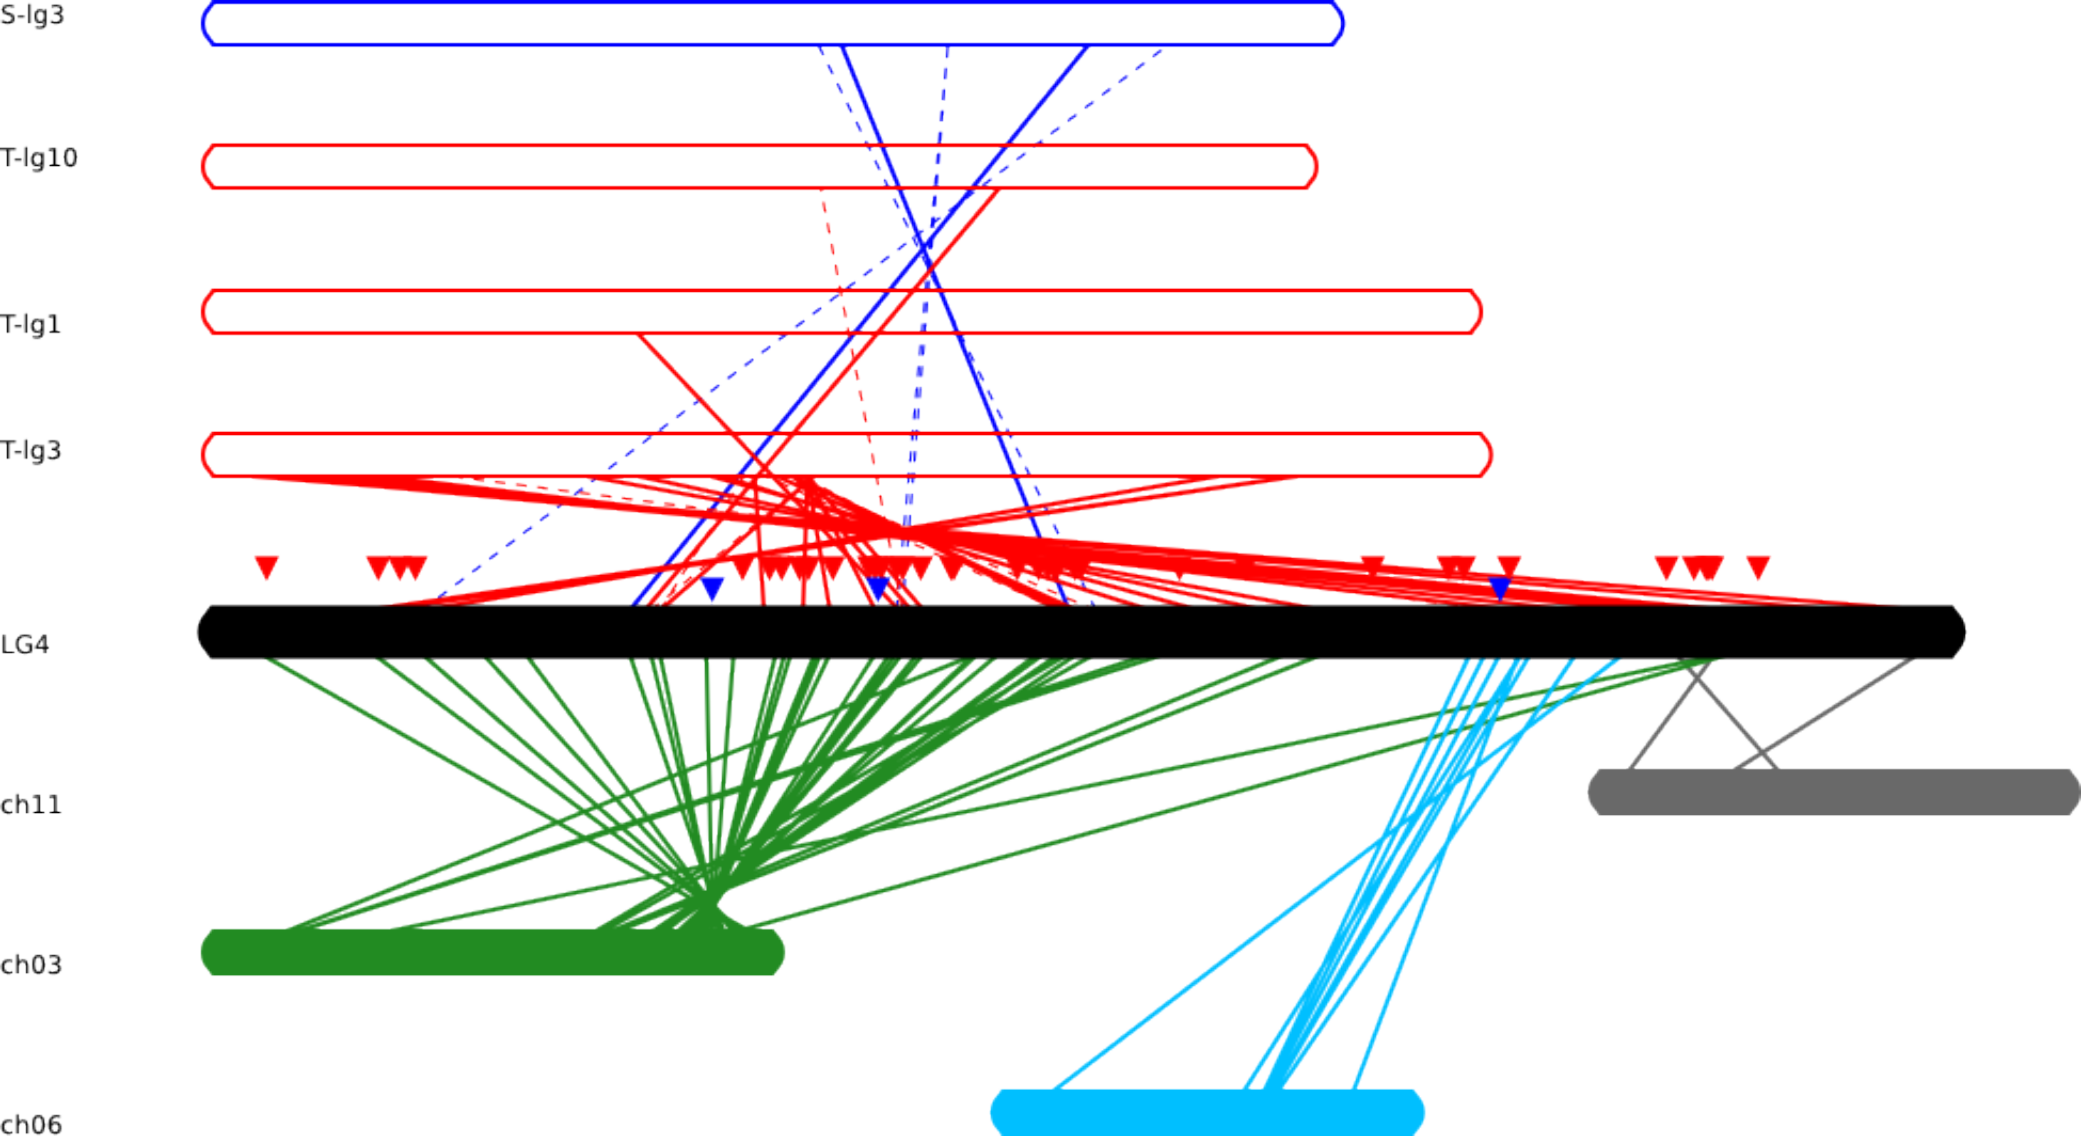

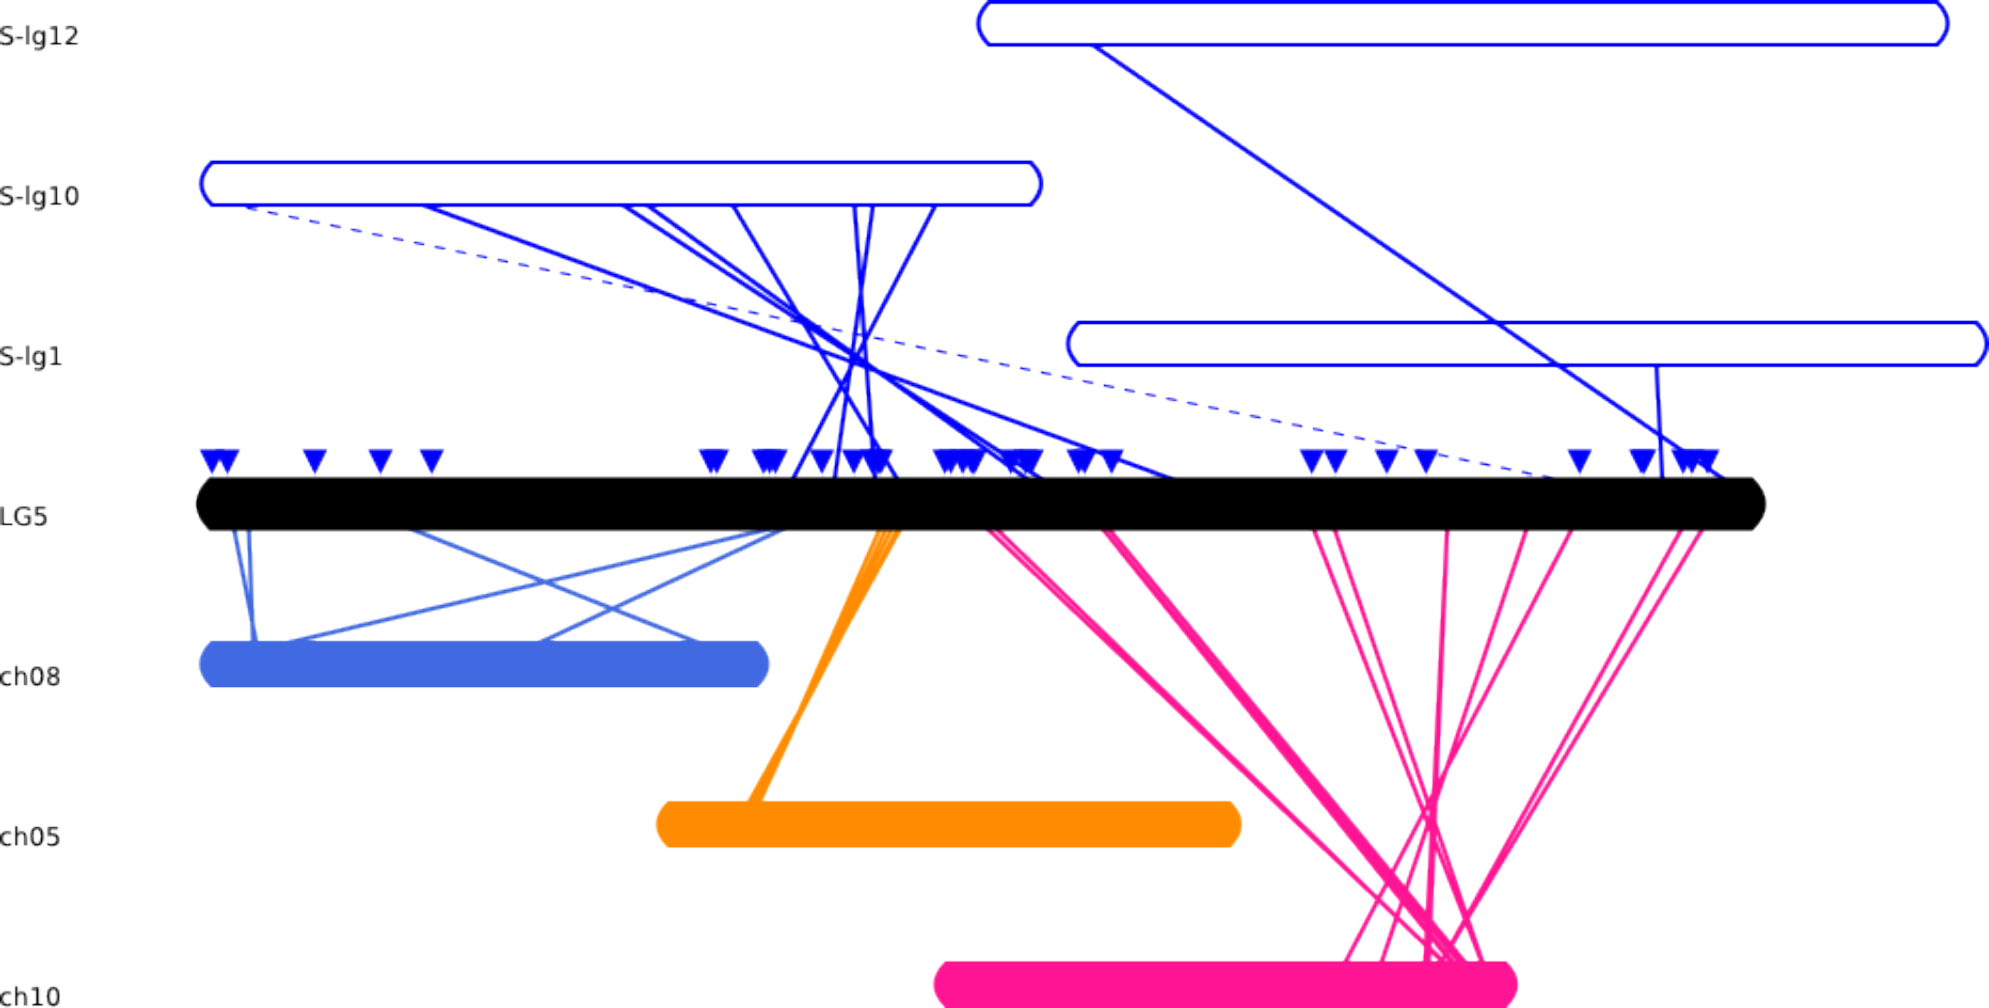

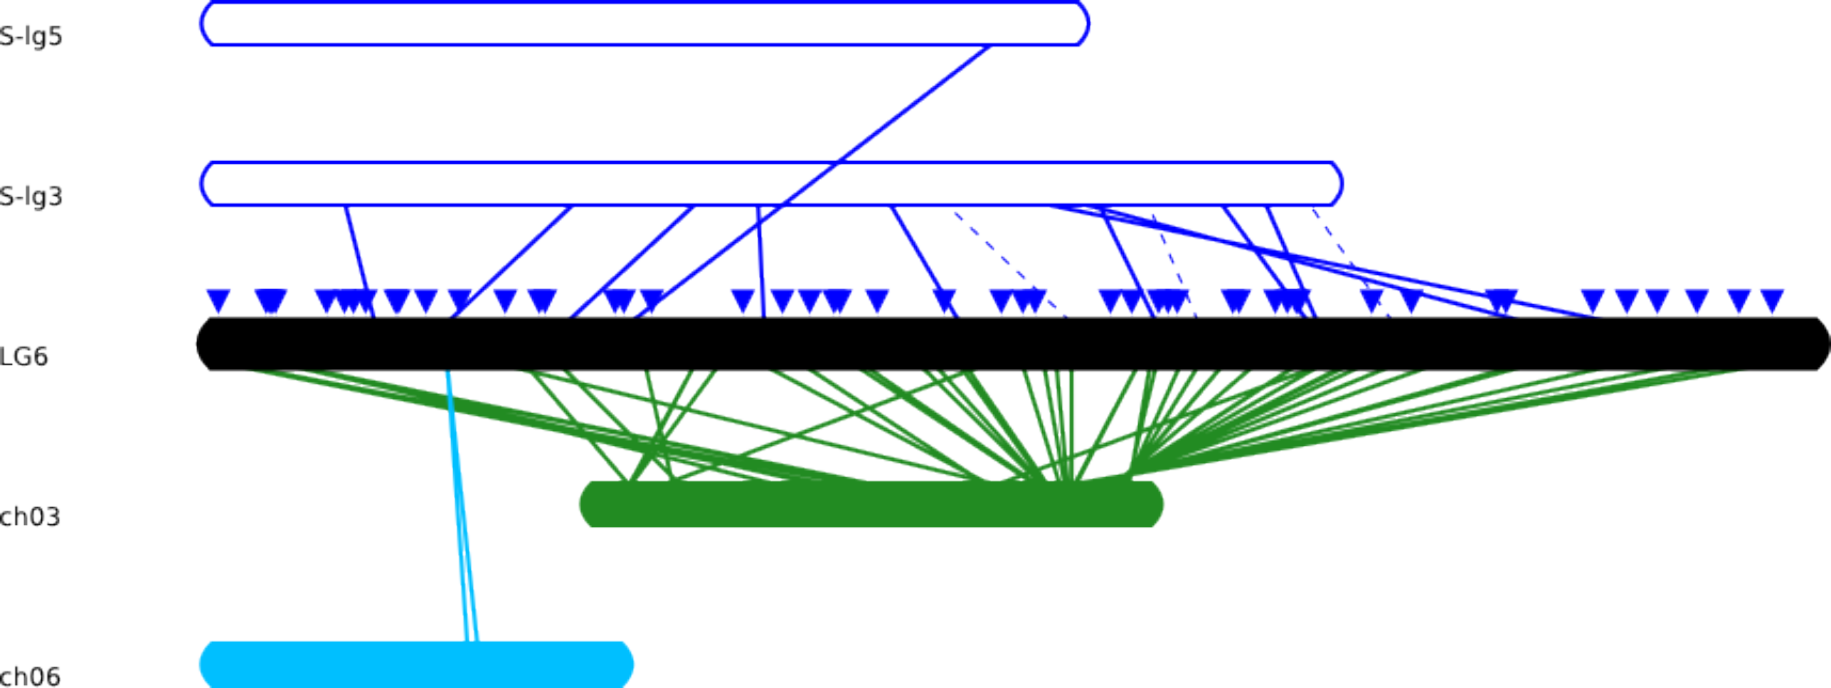

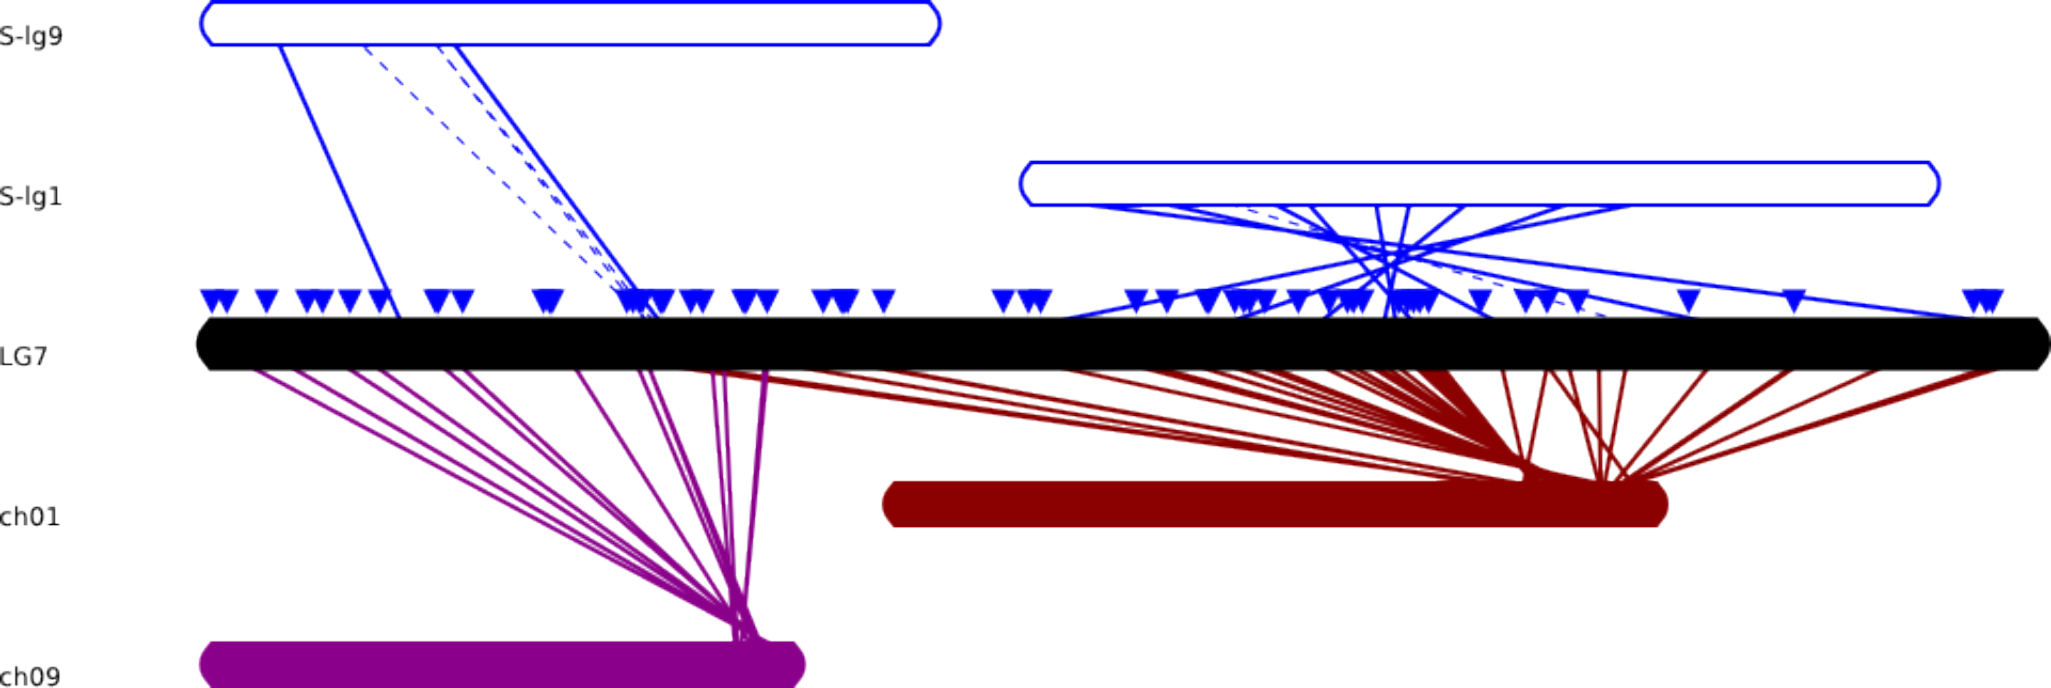

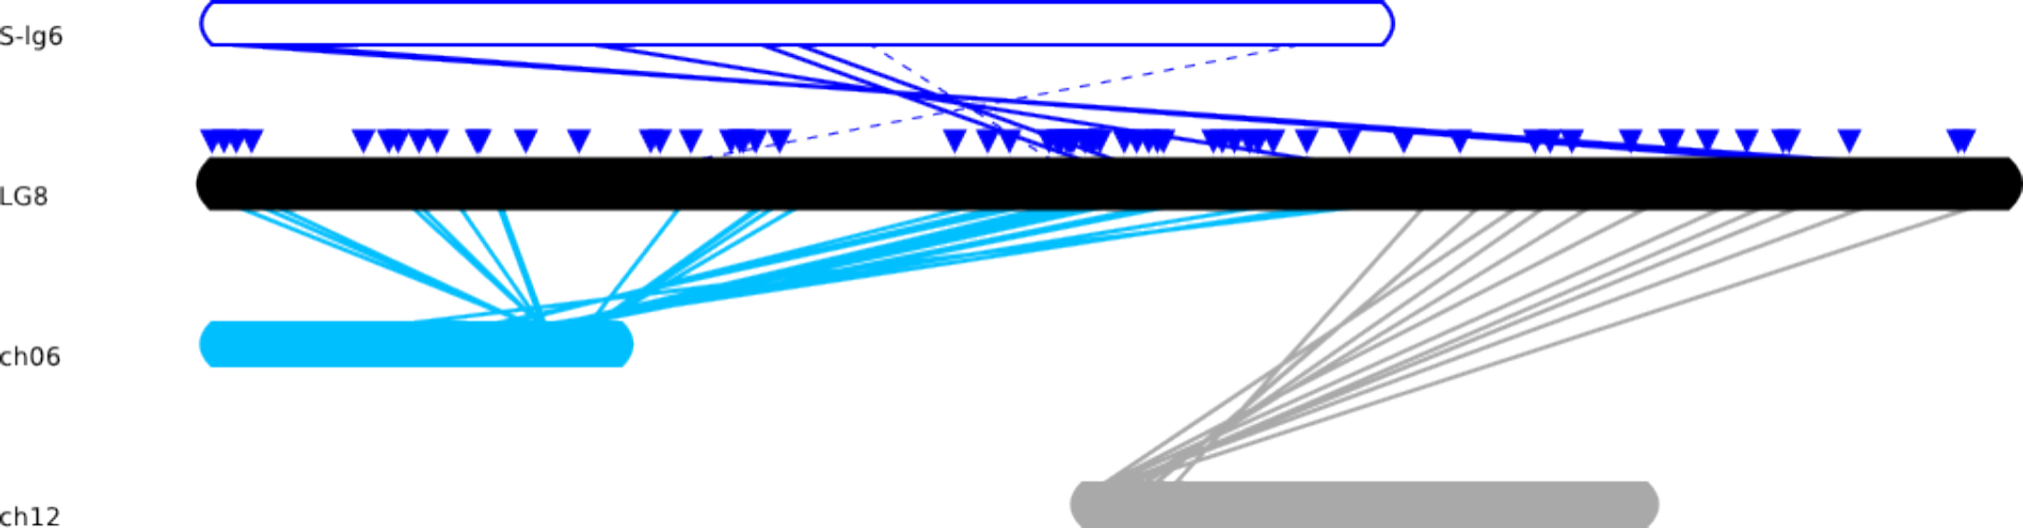



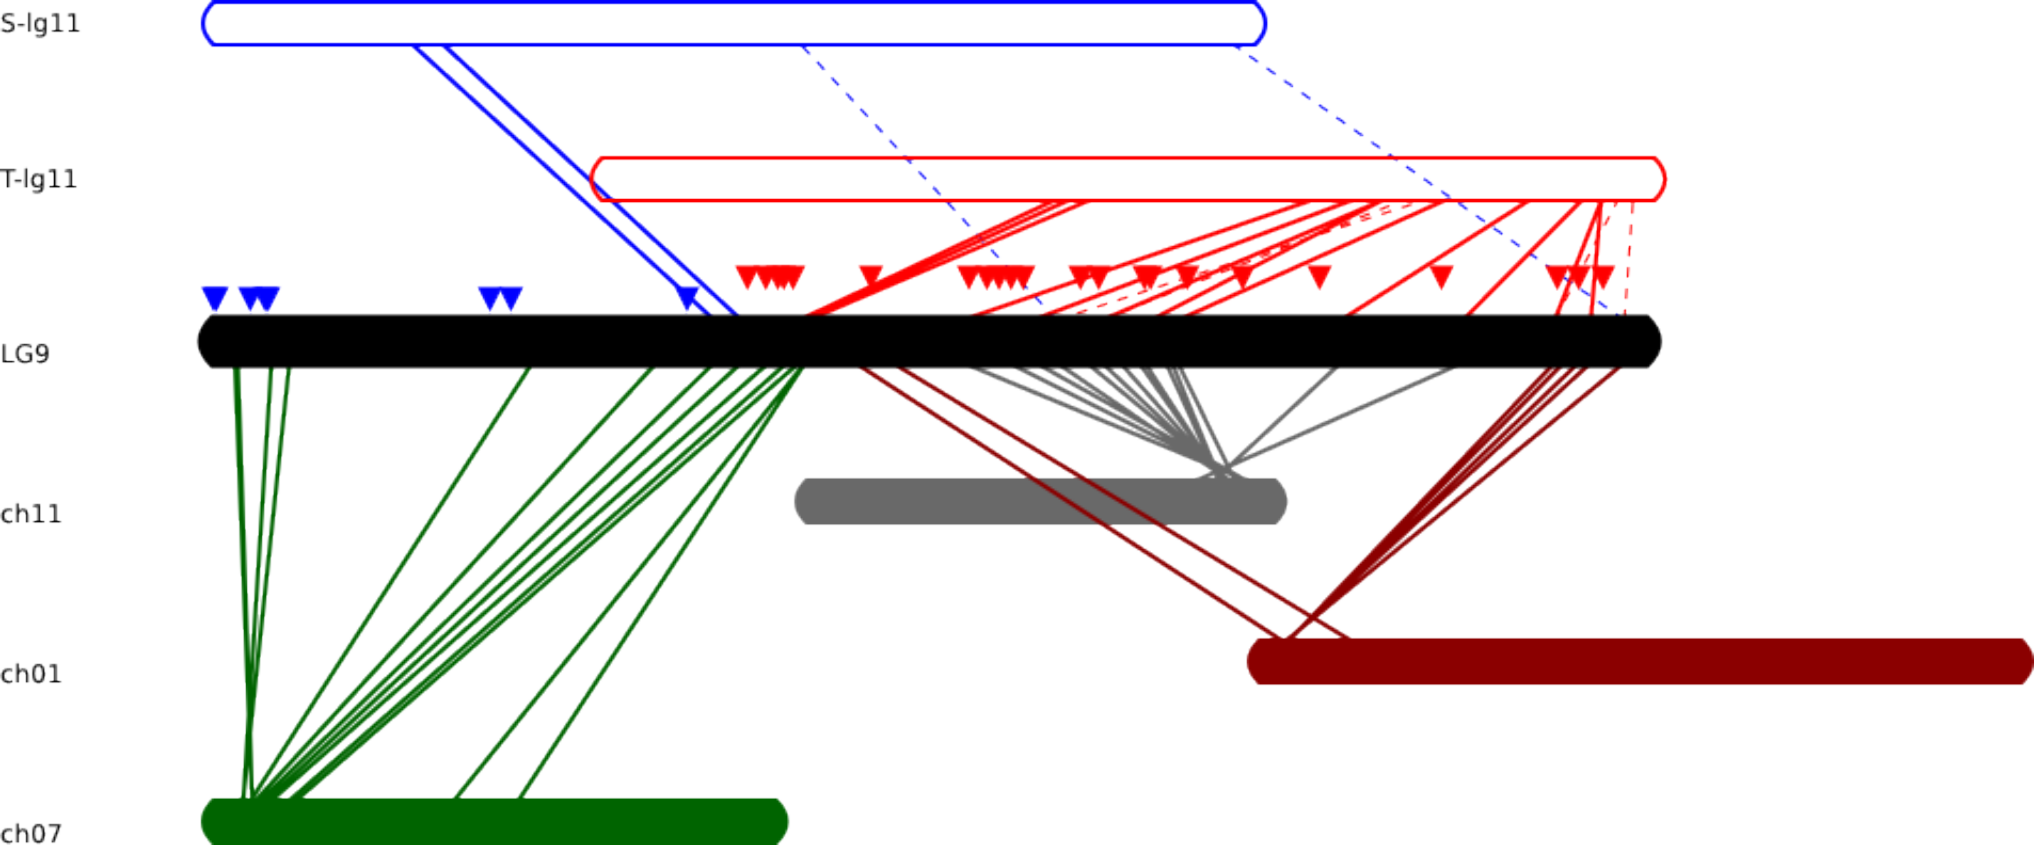

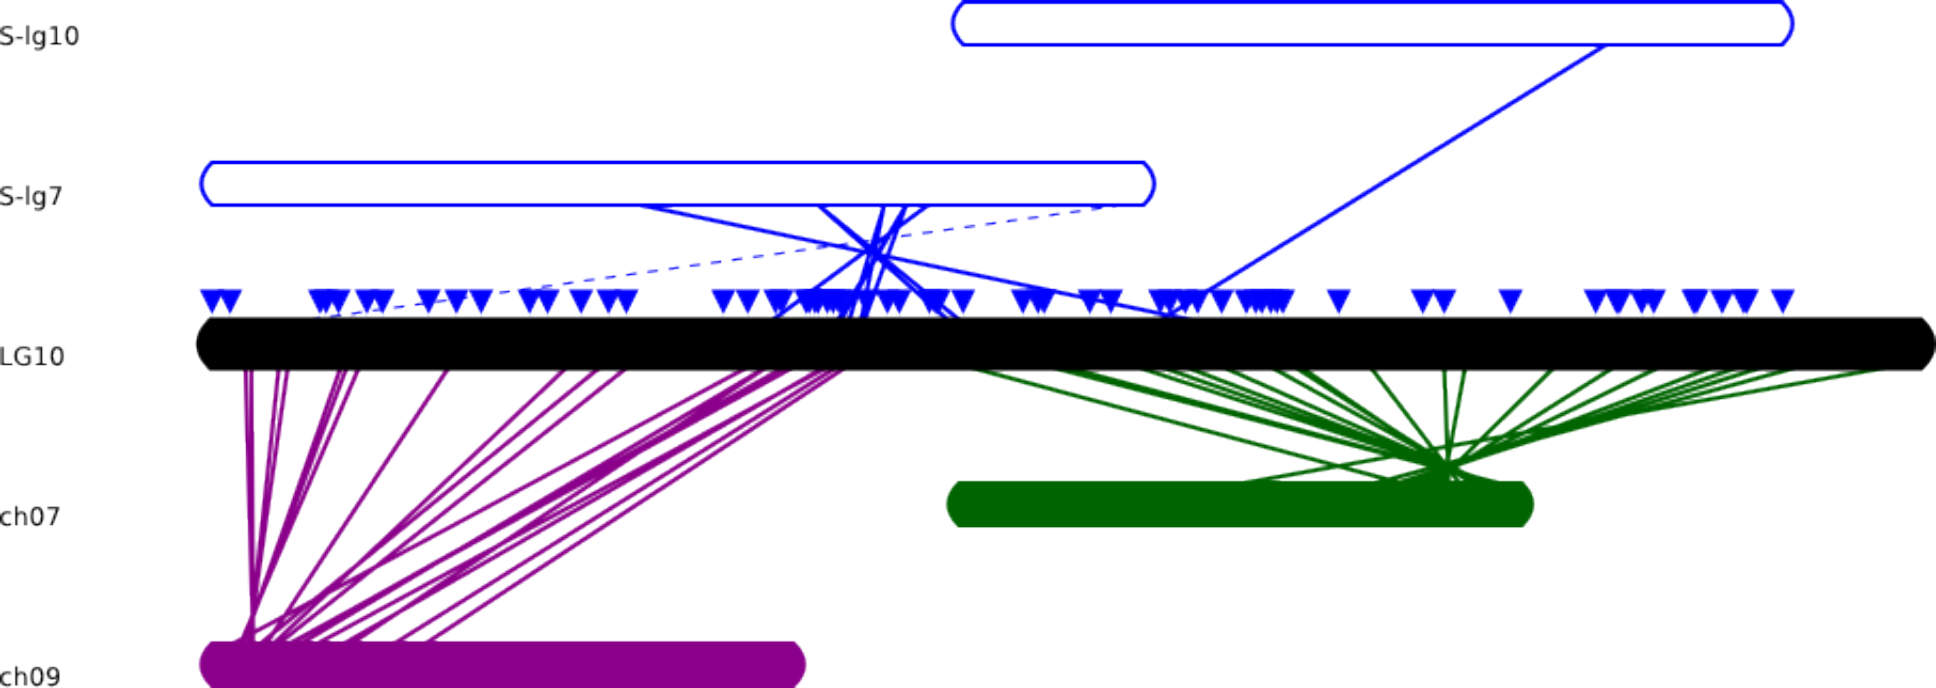

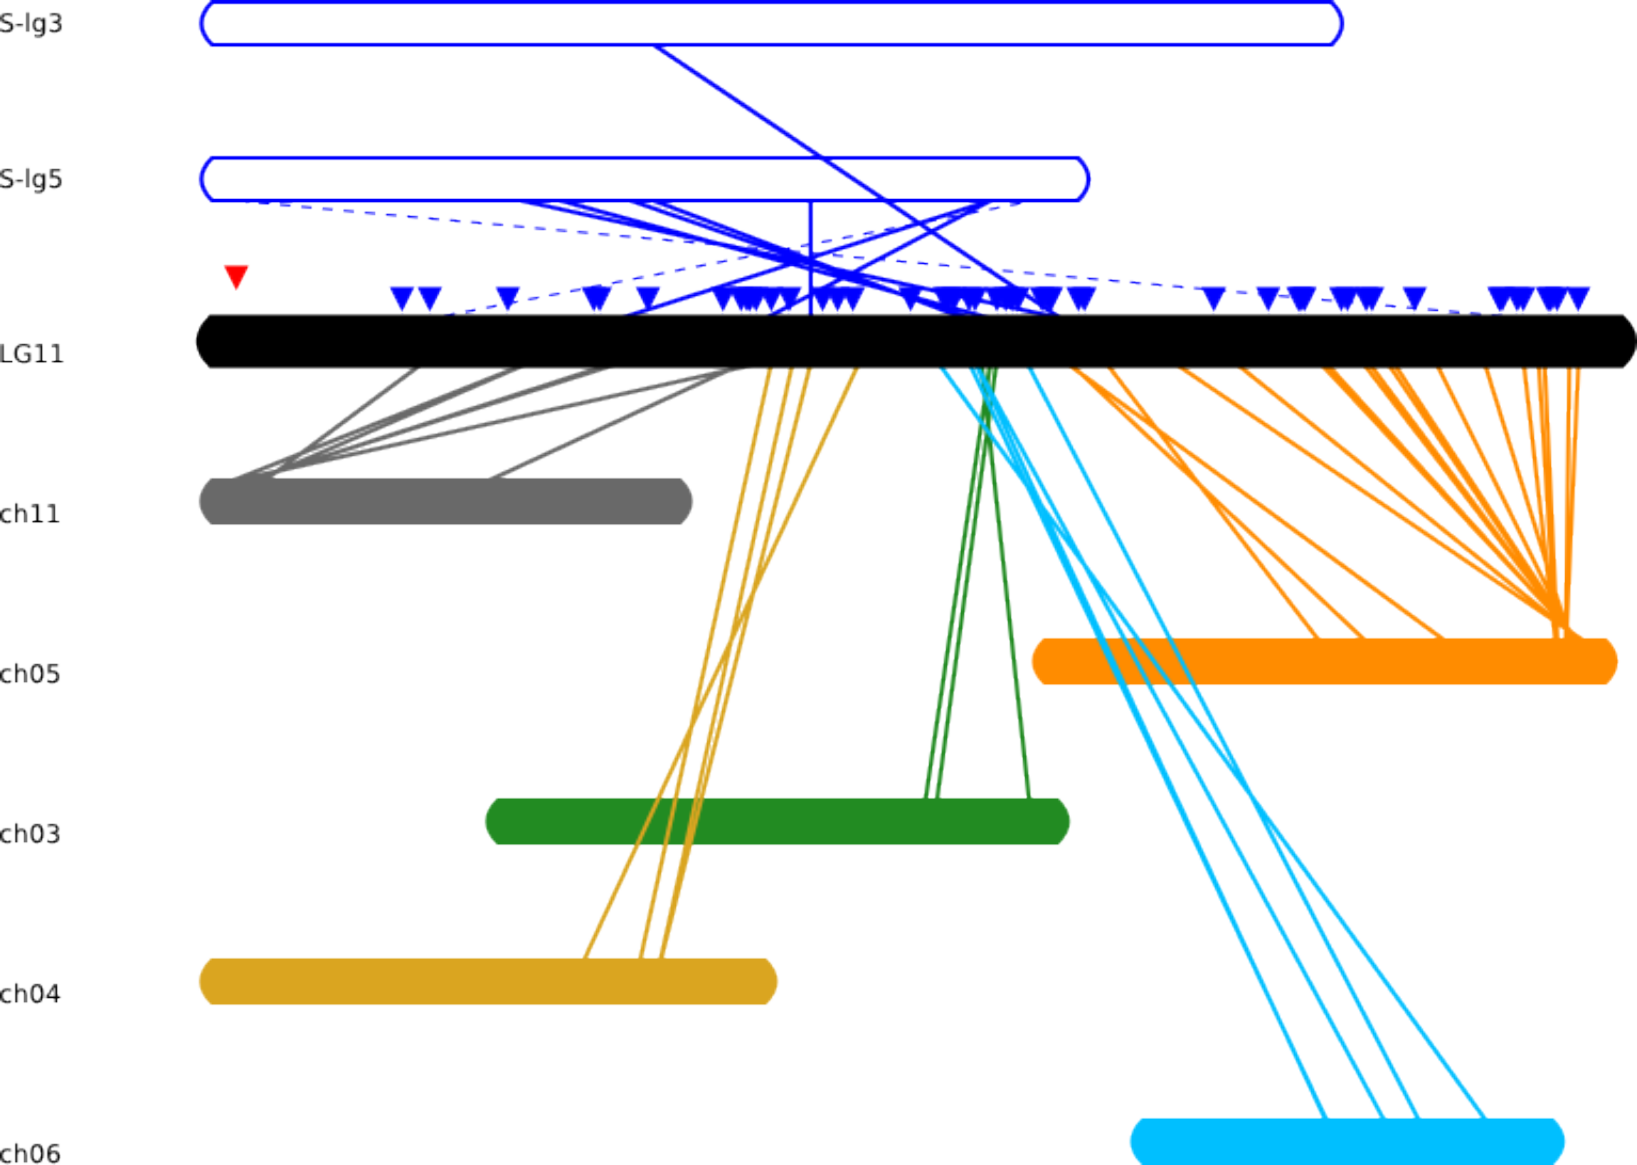

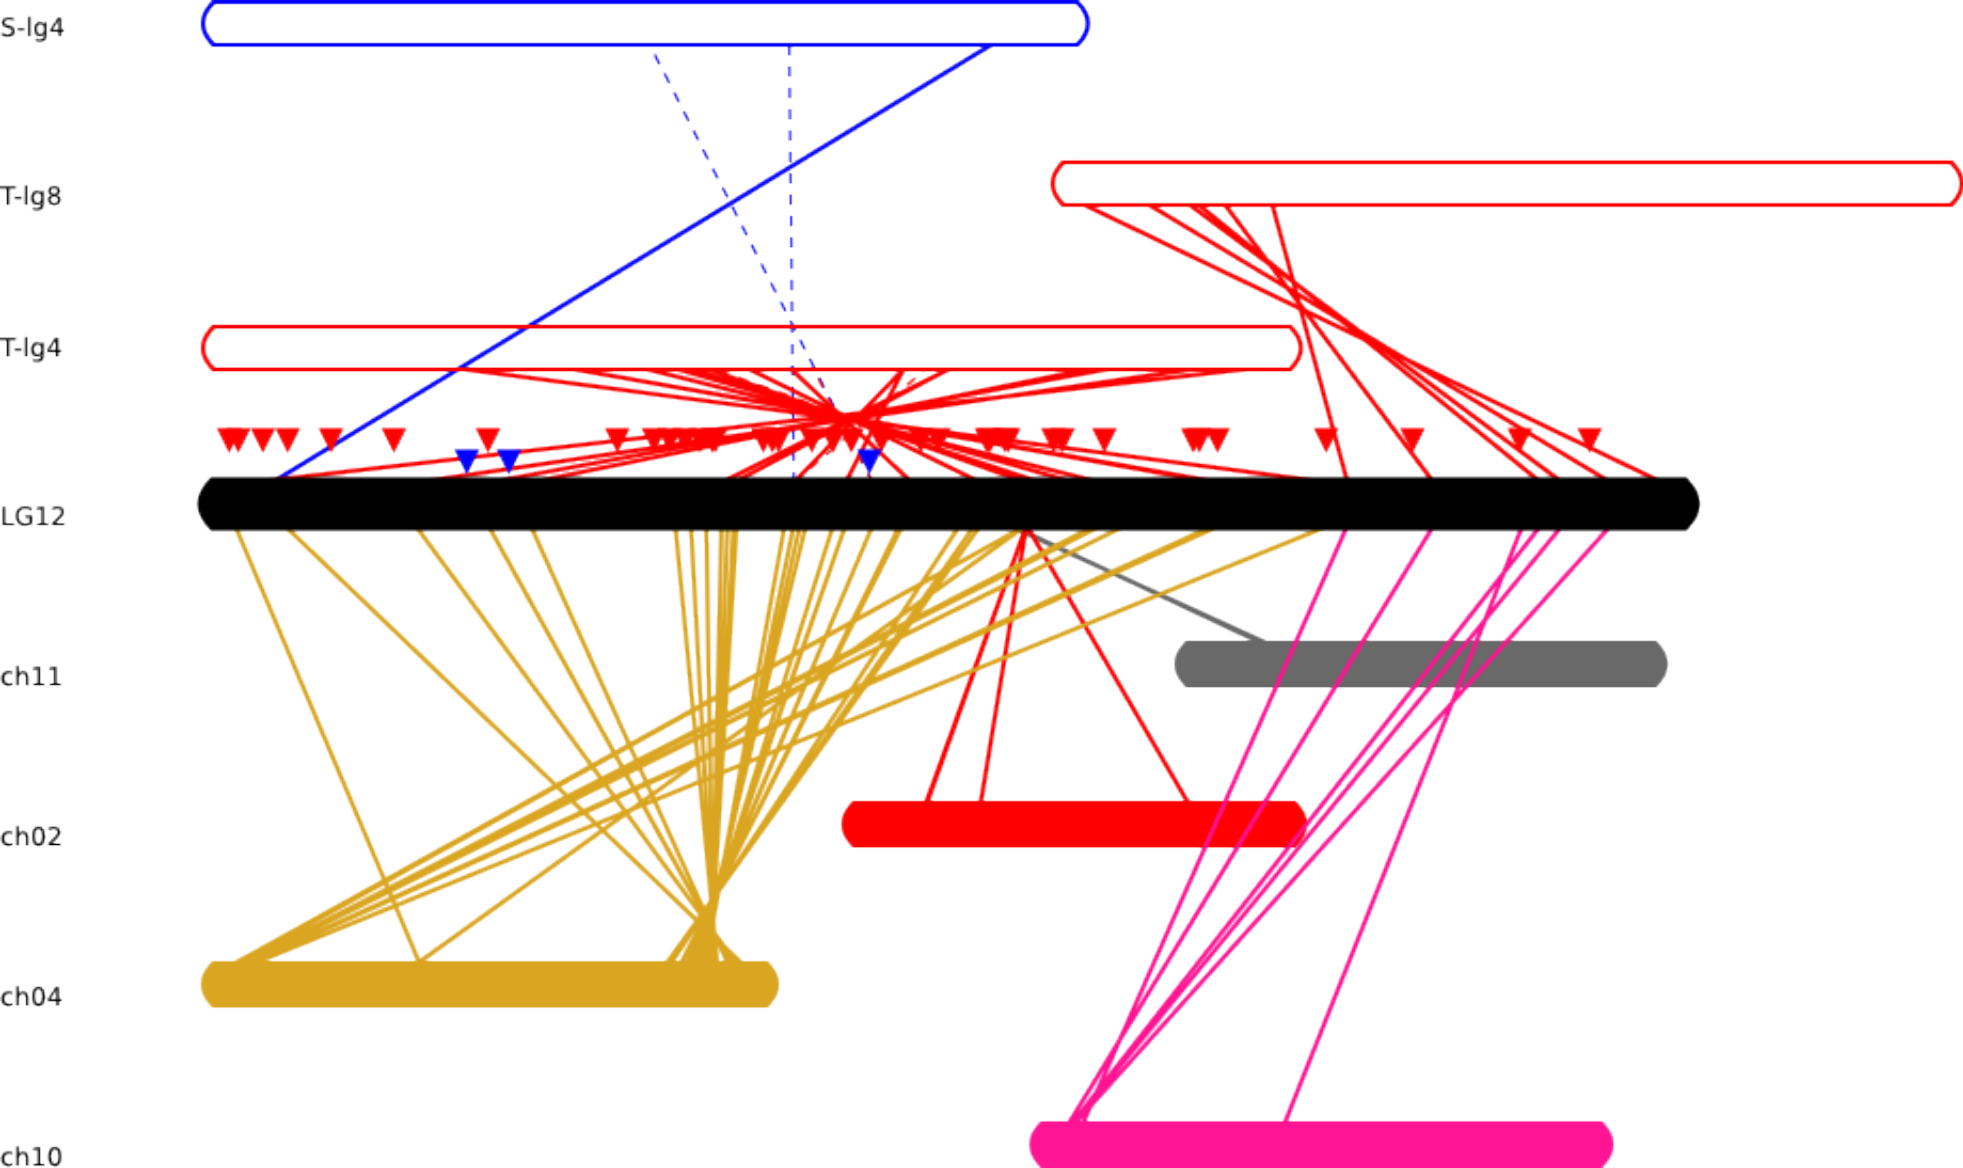

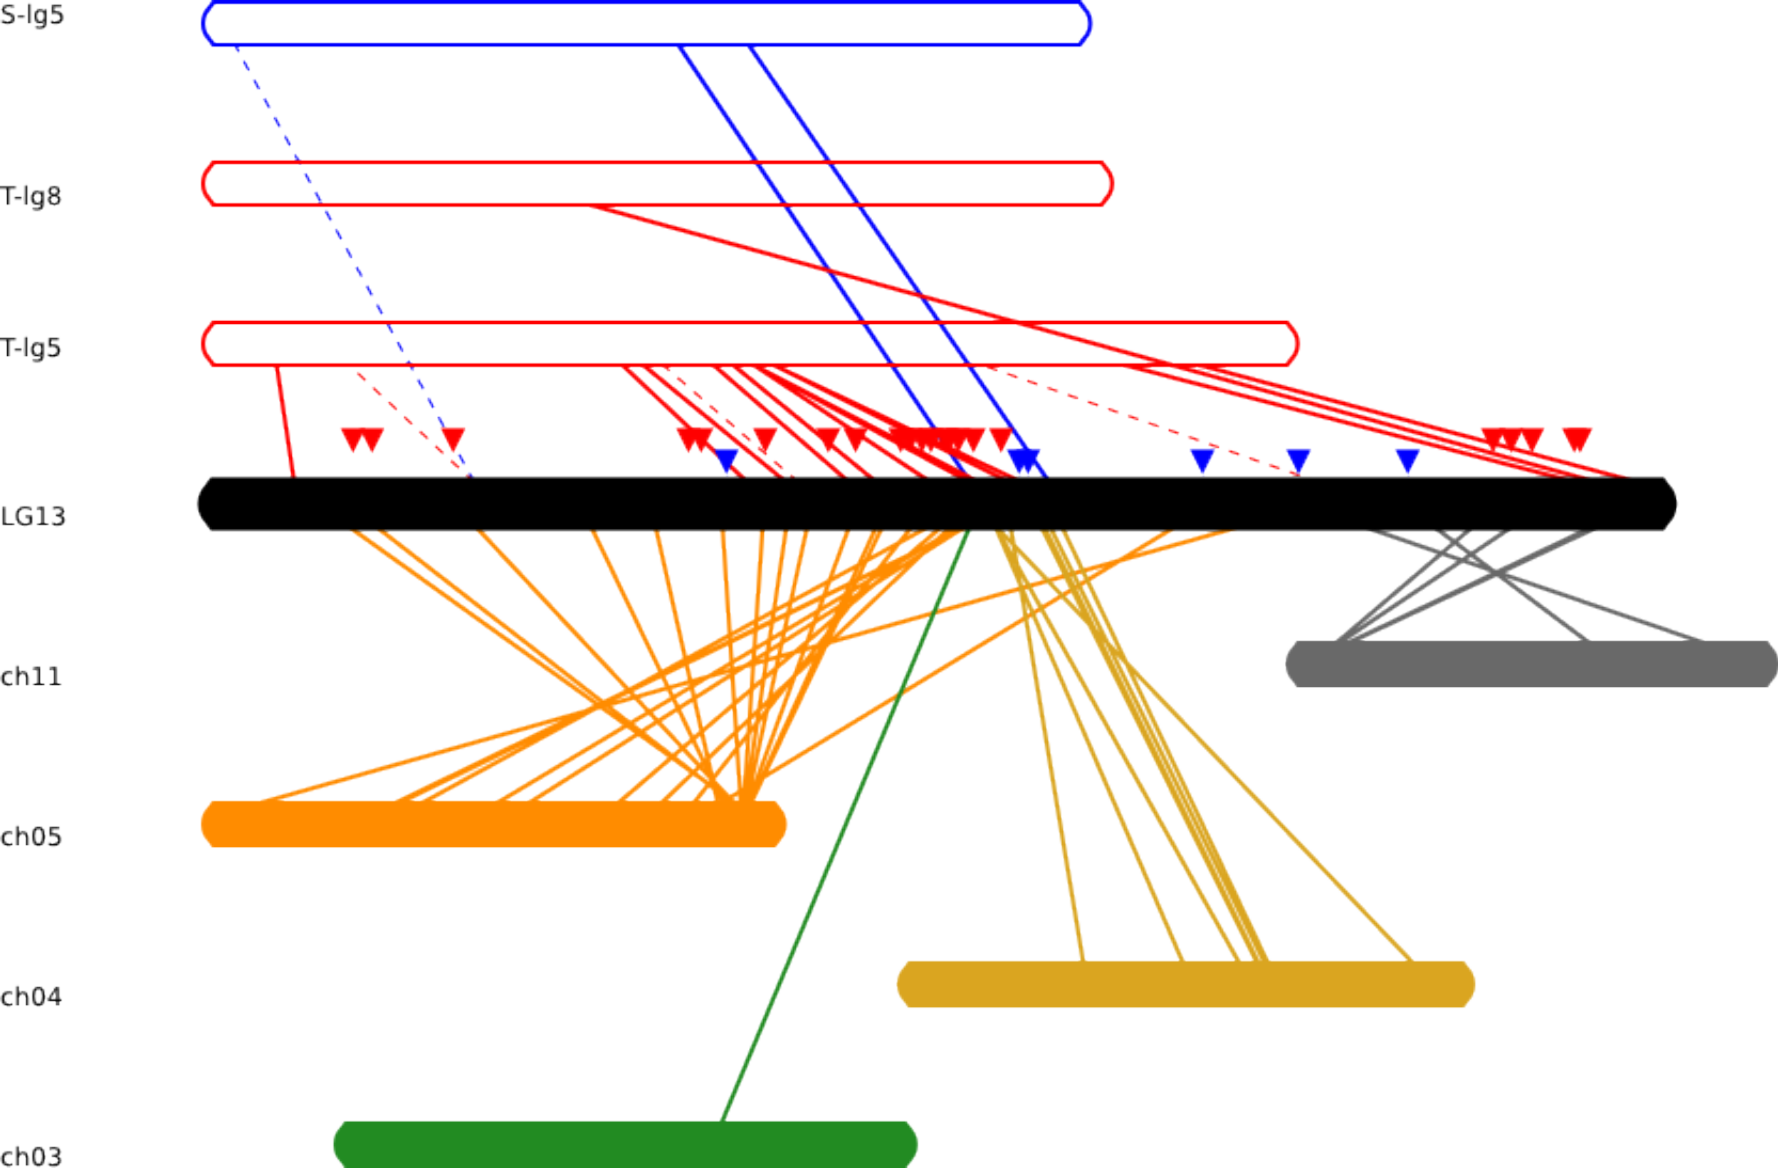

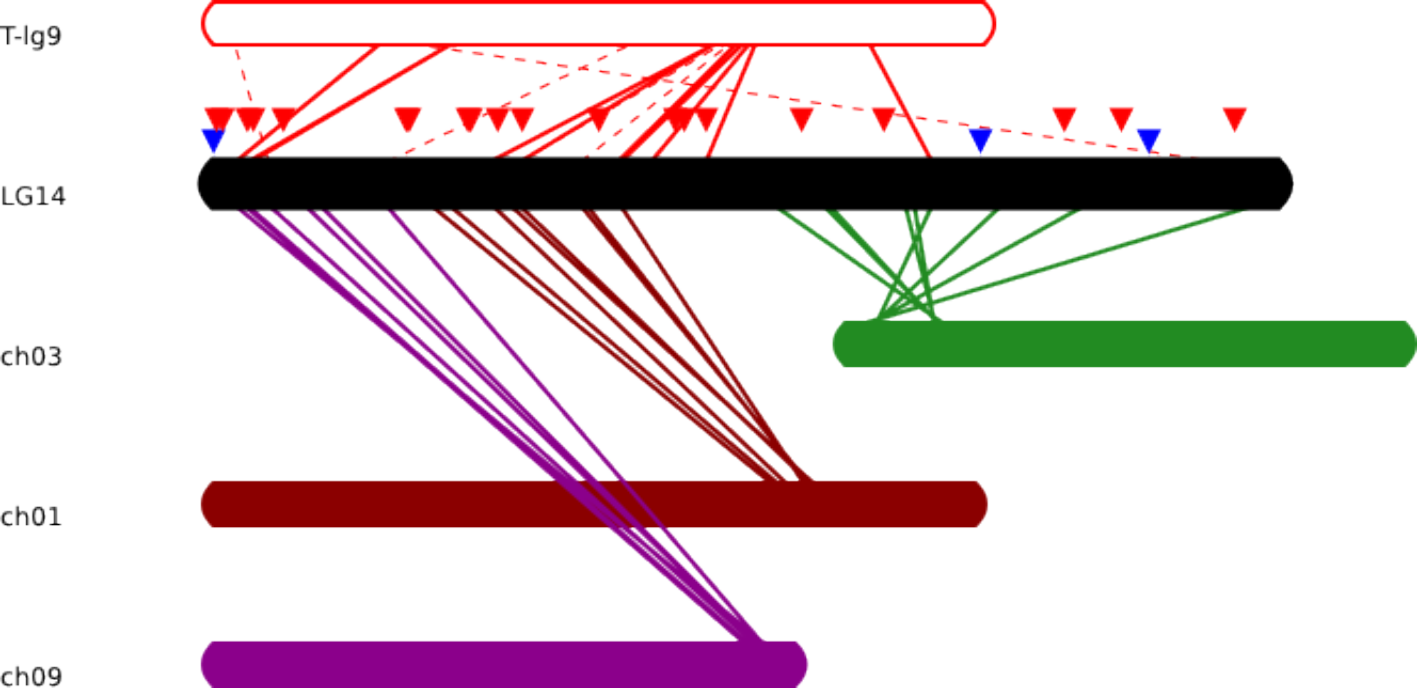

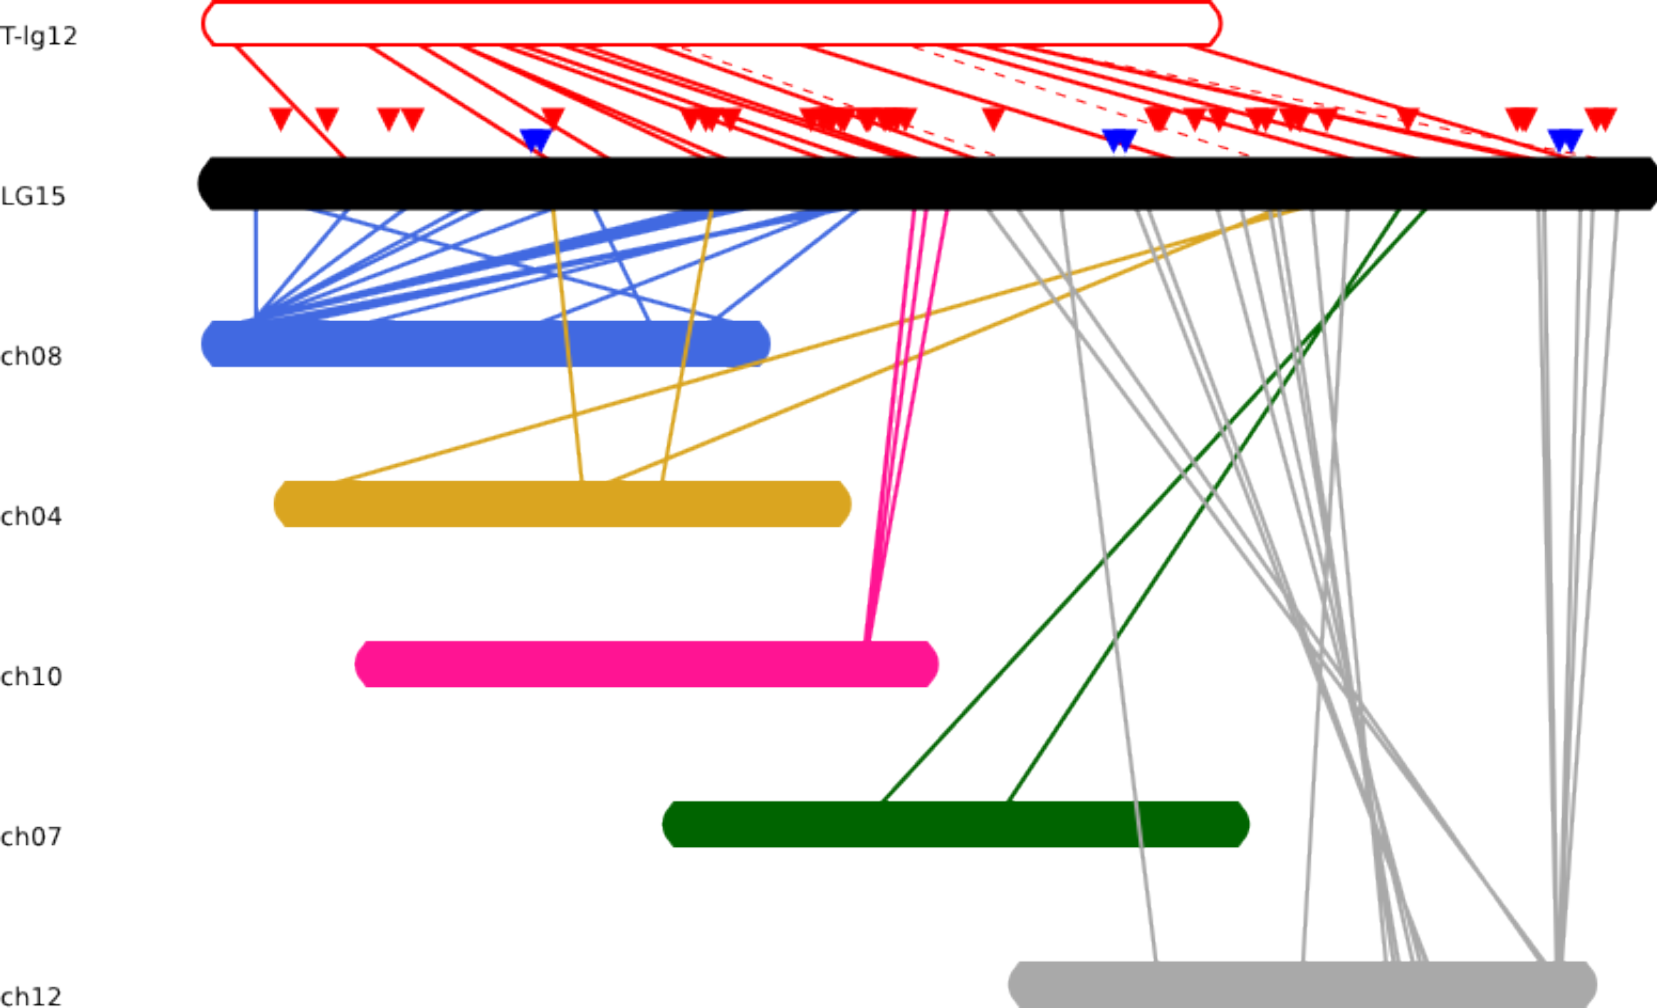

S-Ig4

LG16

ch02

ch11

ch04

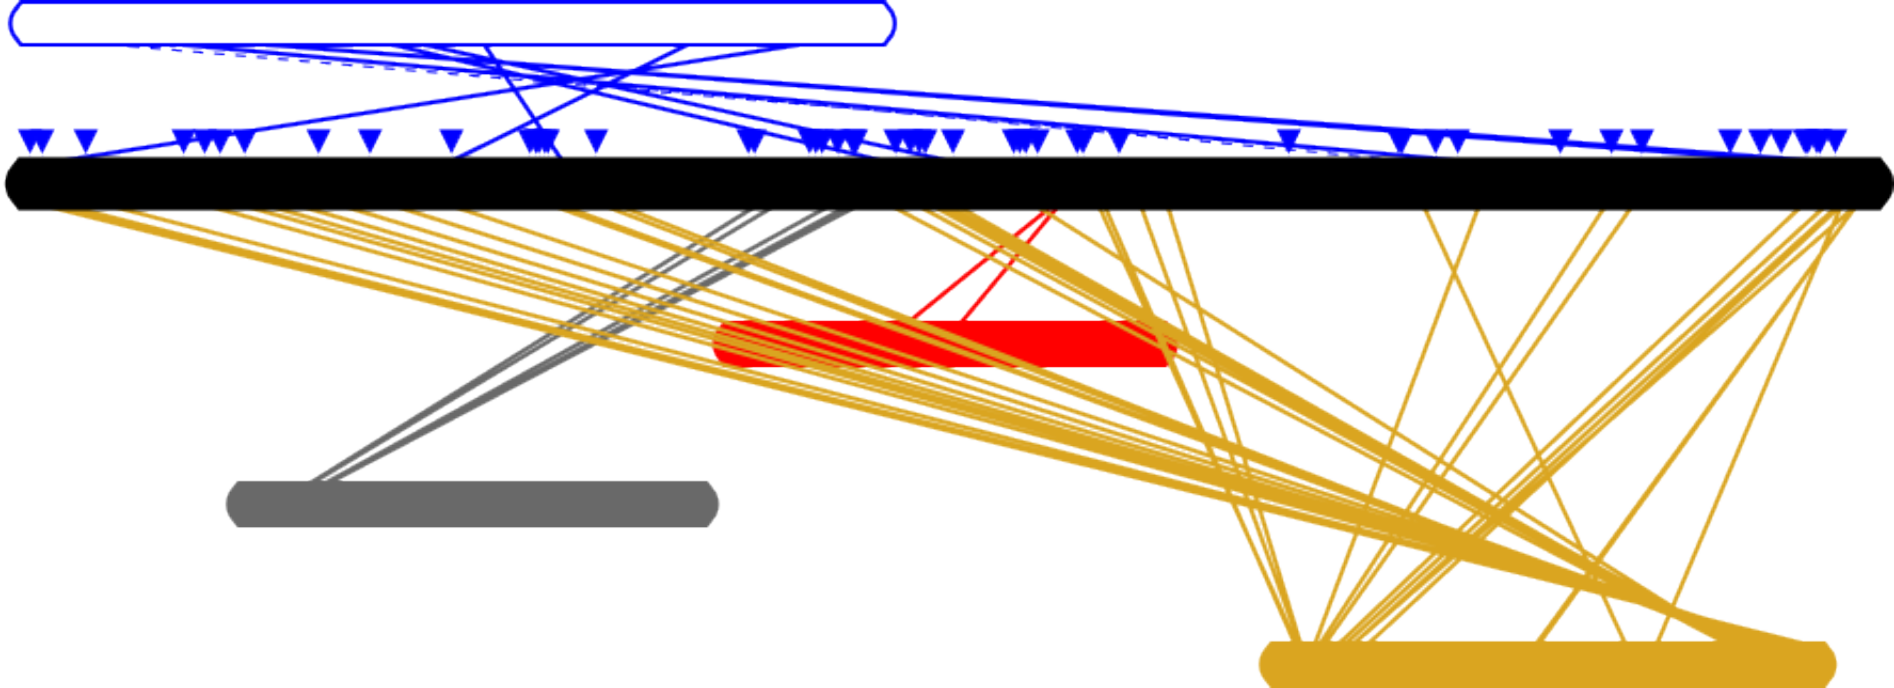



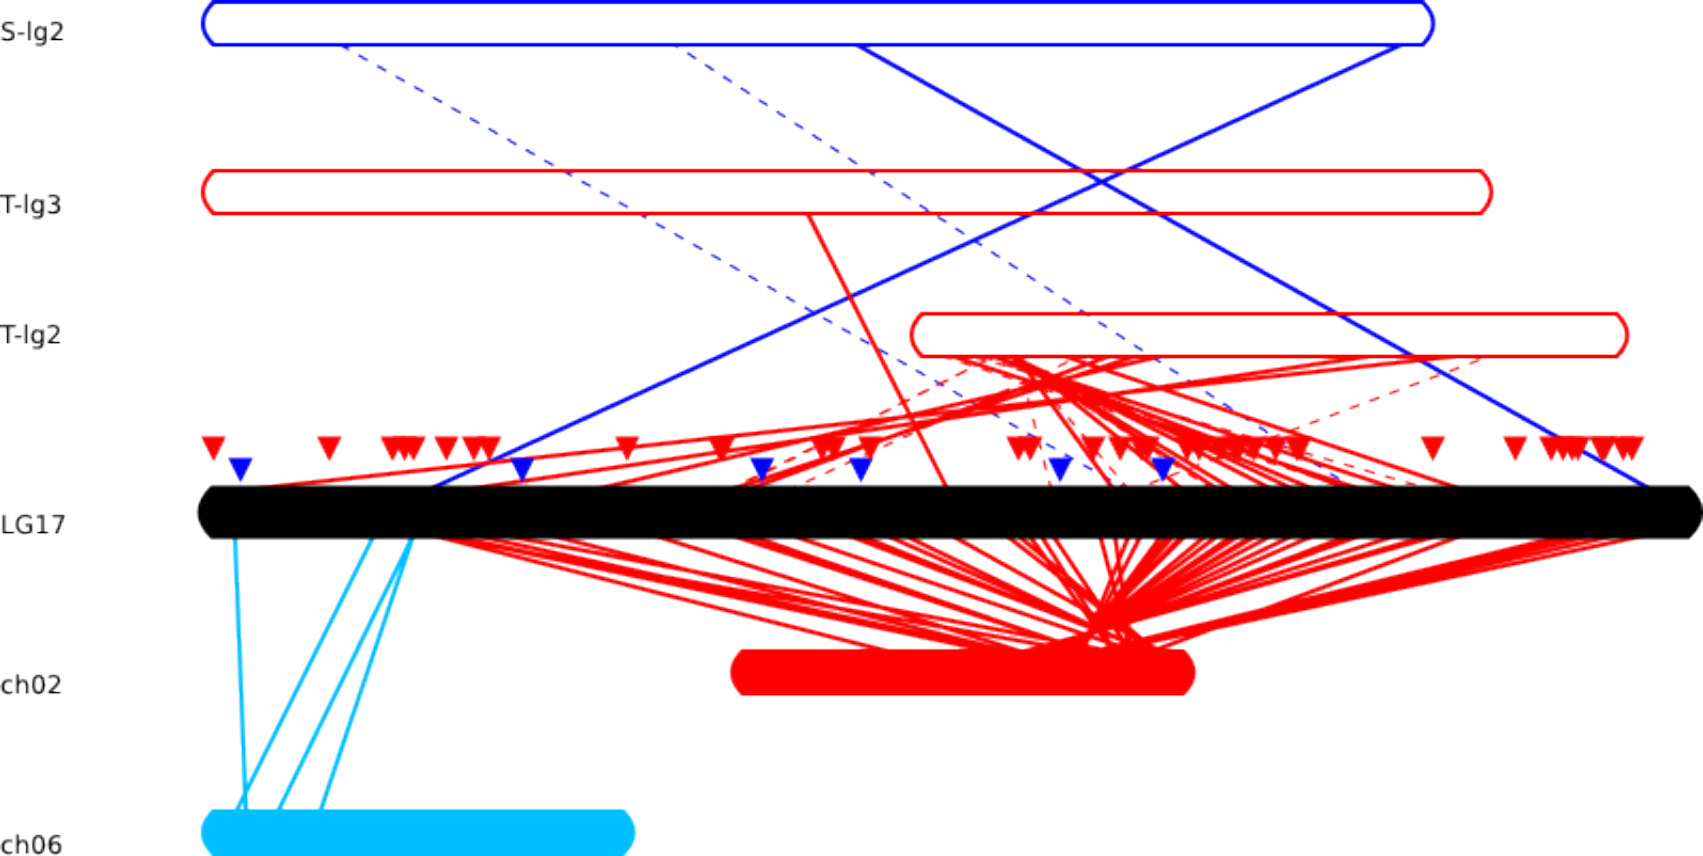

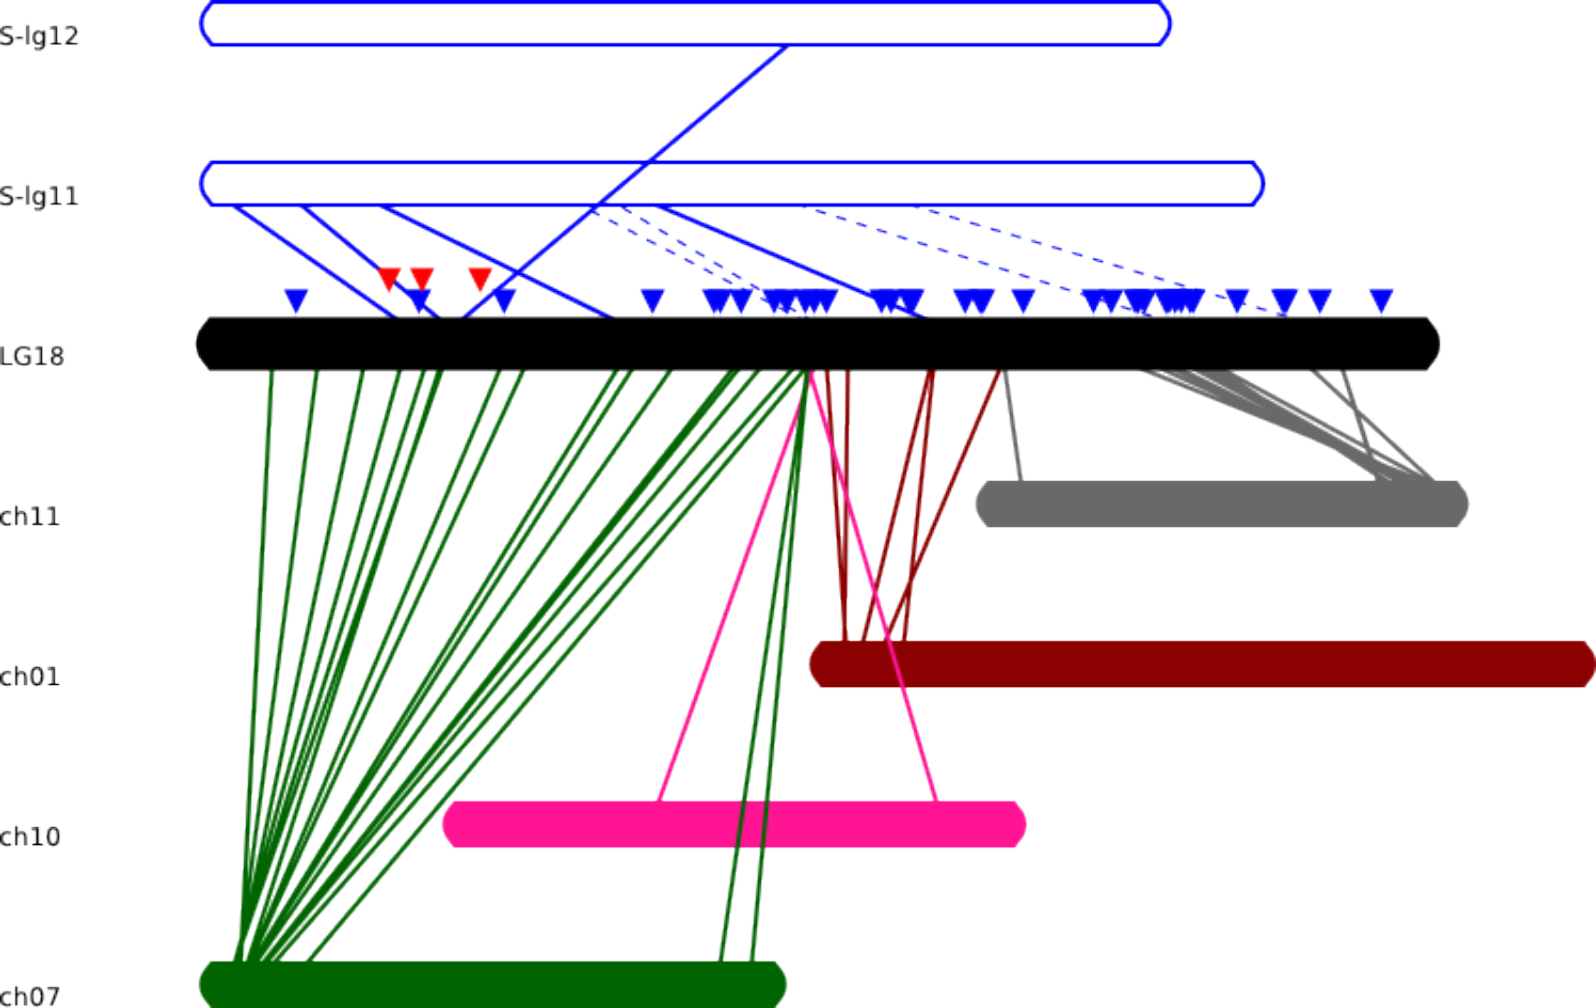

S-Ig1

T-Ig1

LG19

ch01

ch12

ch09

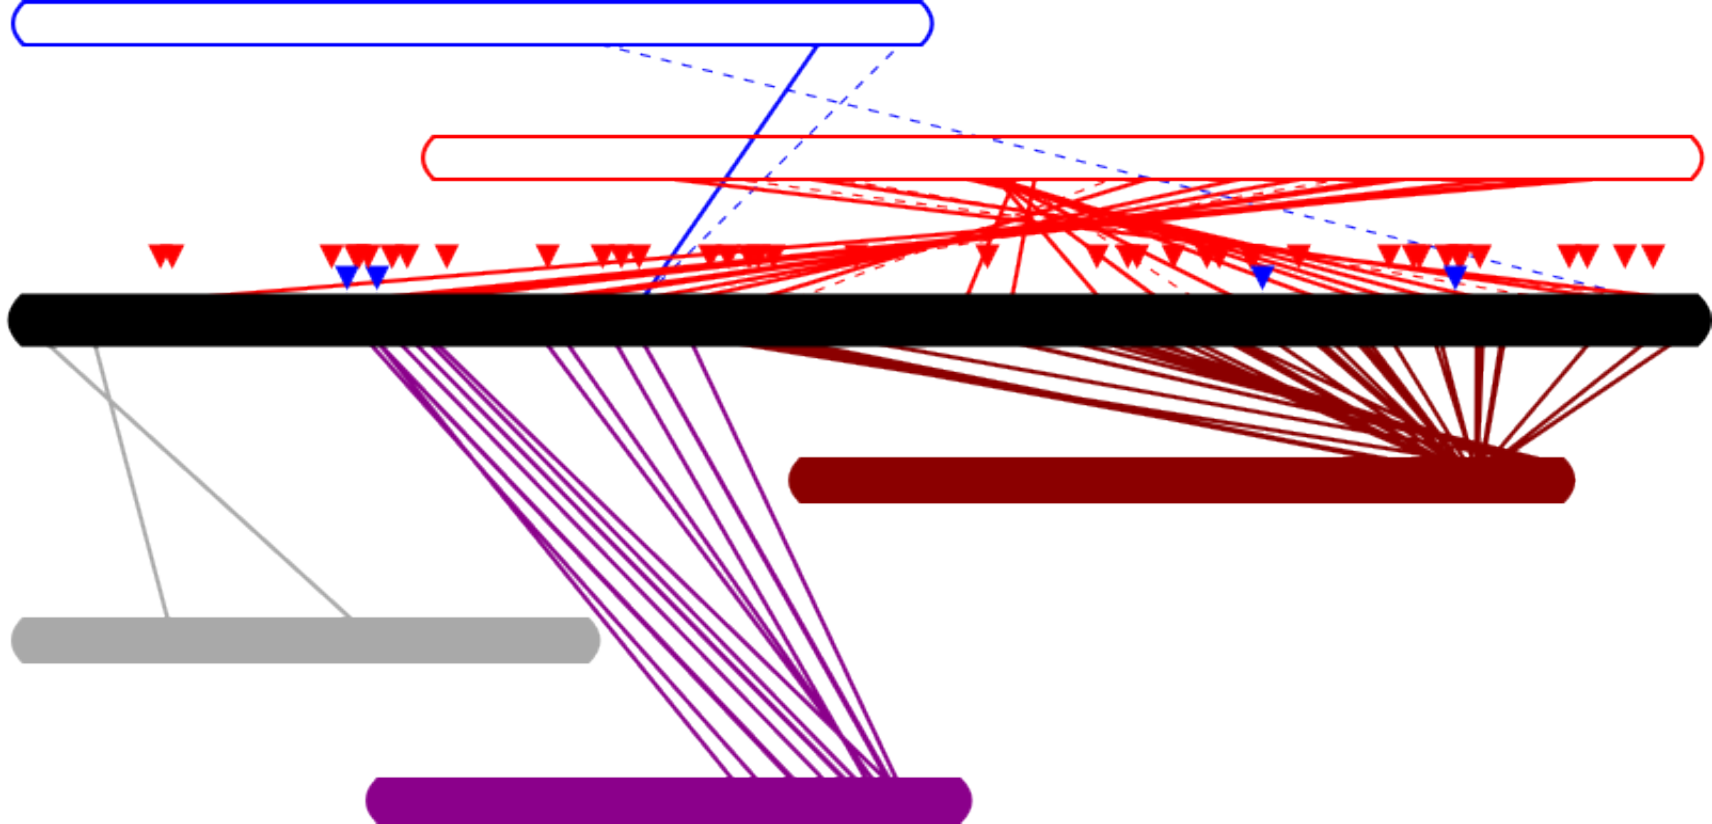

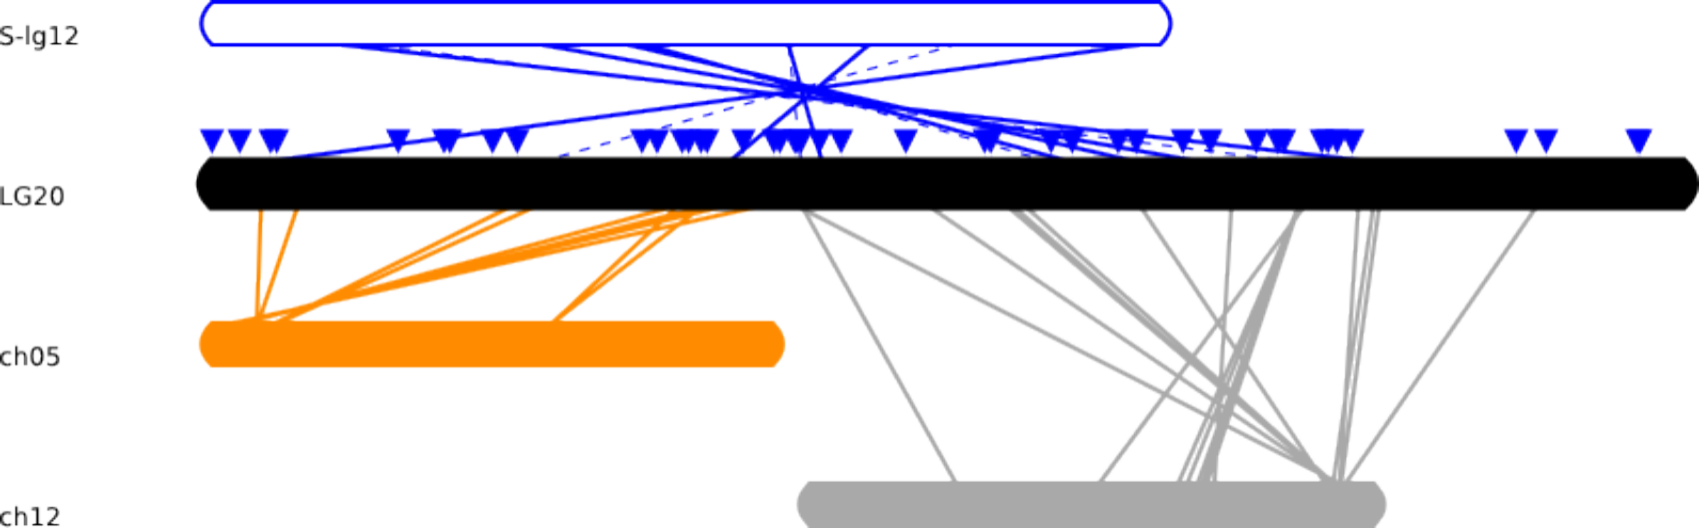

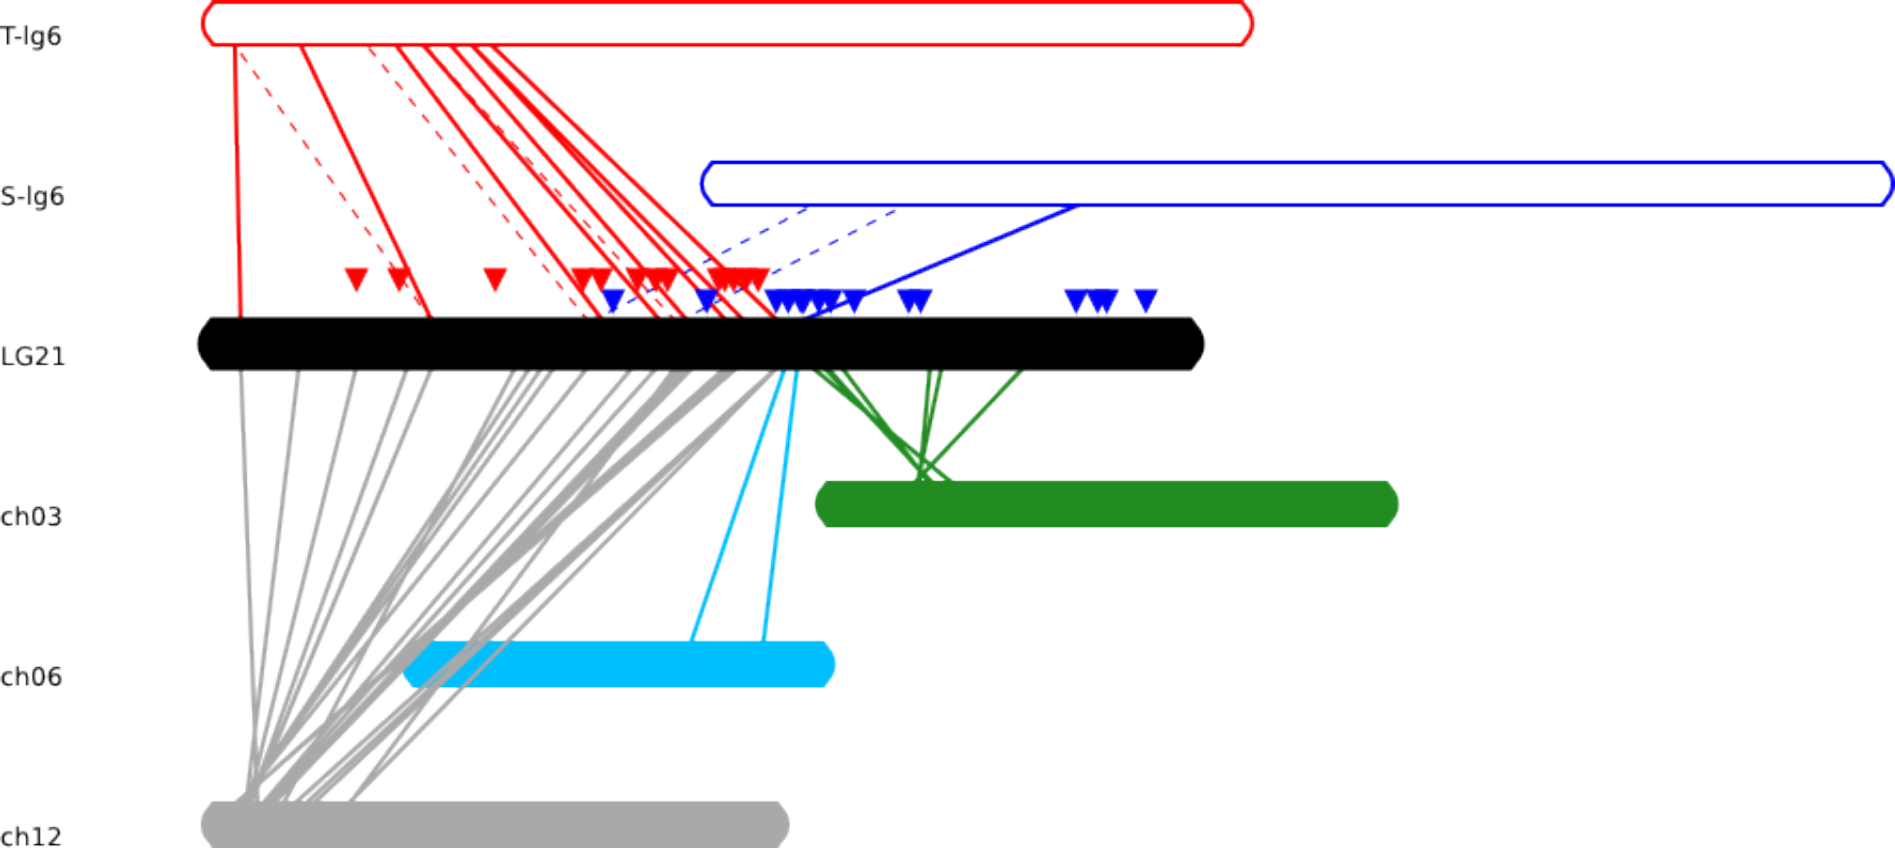

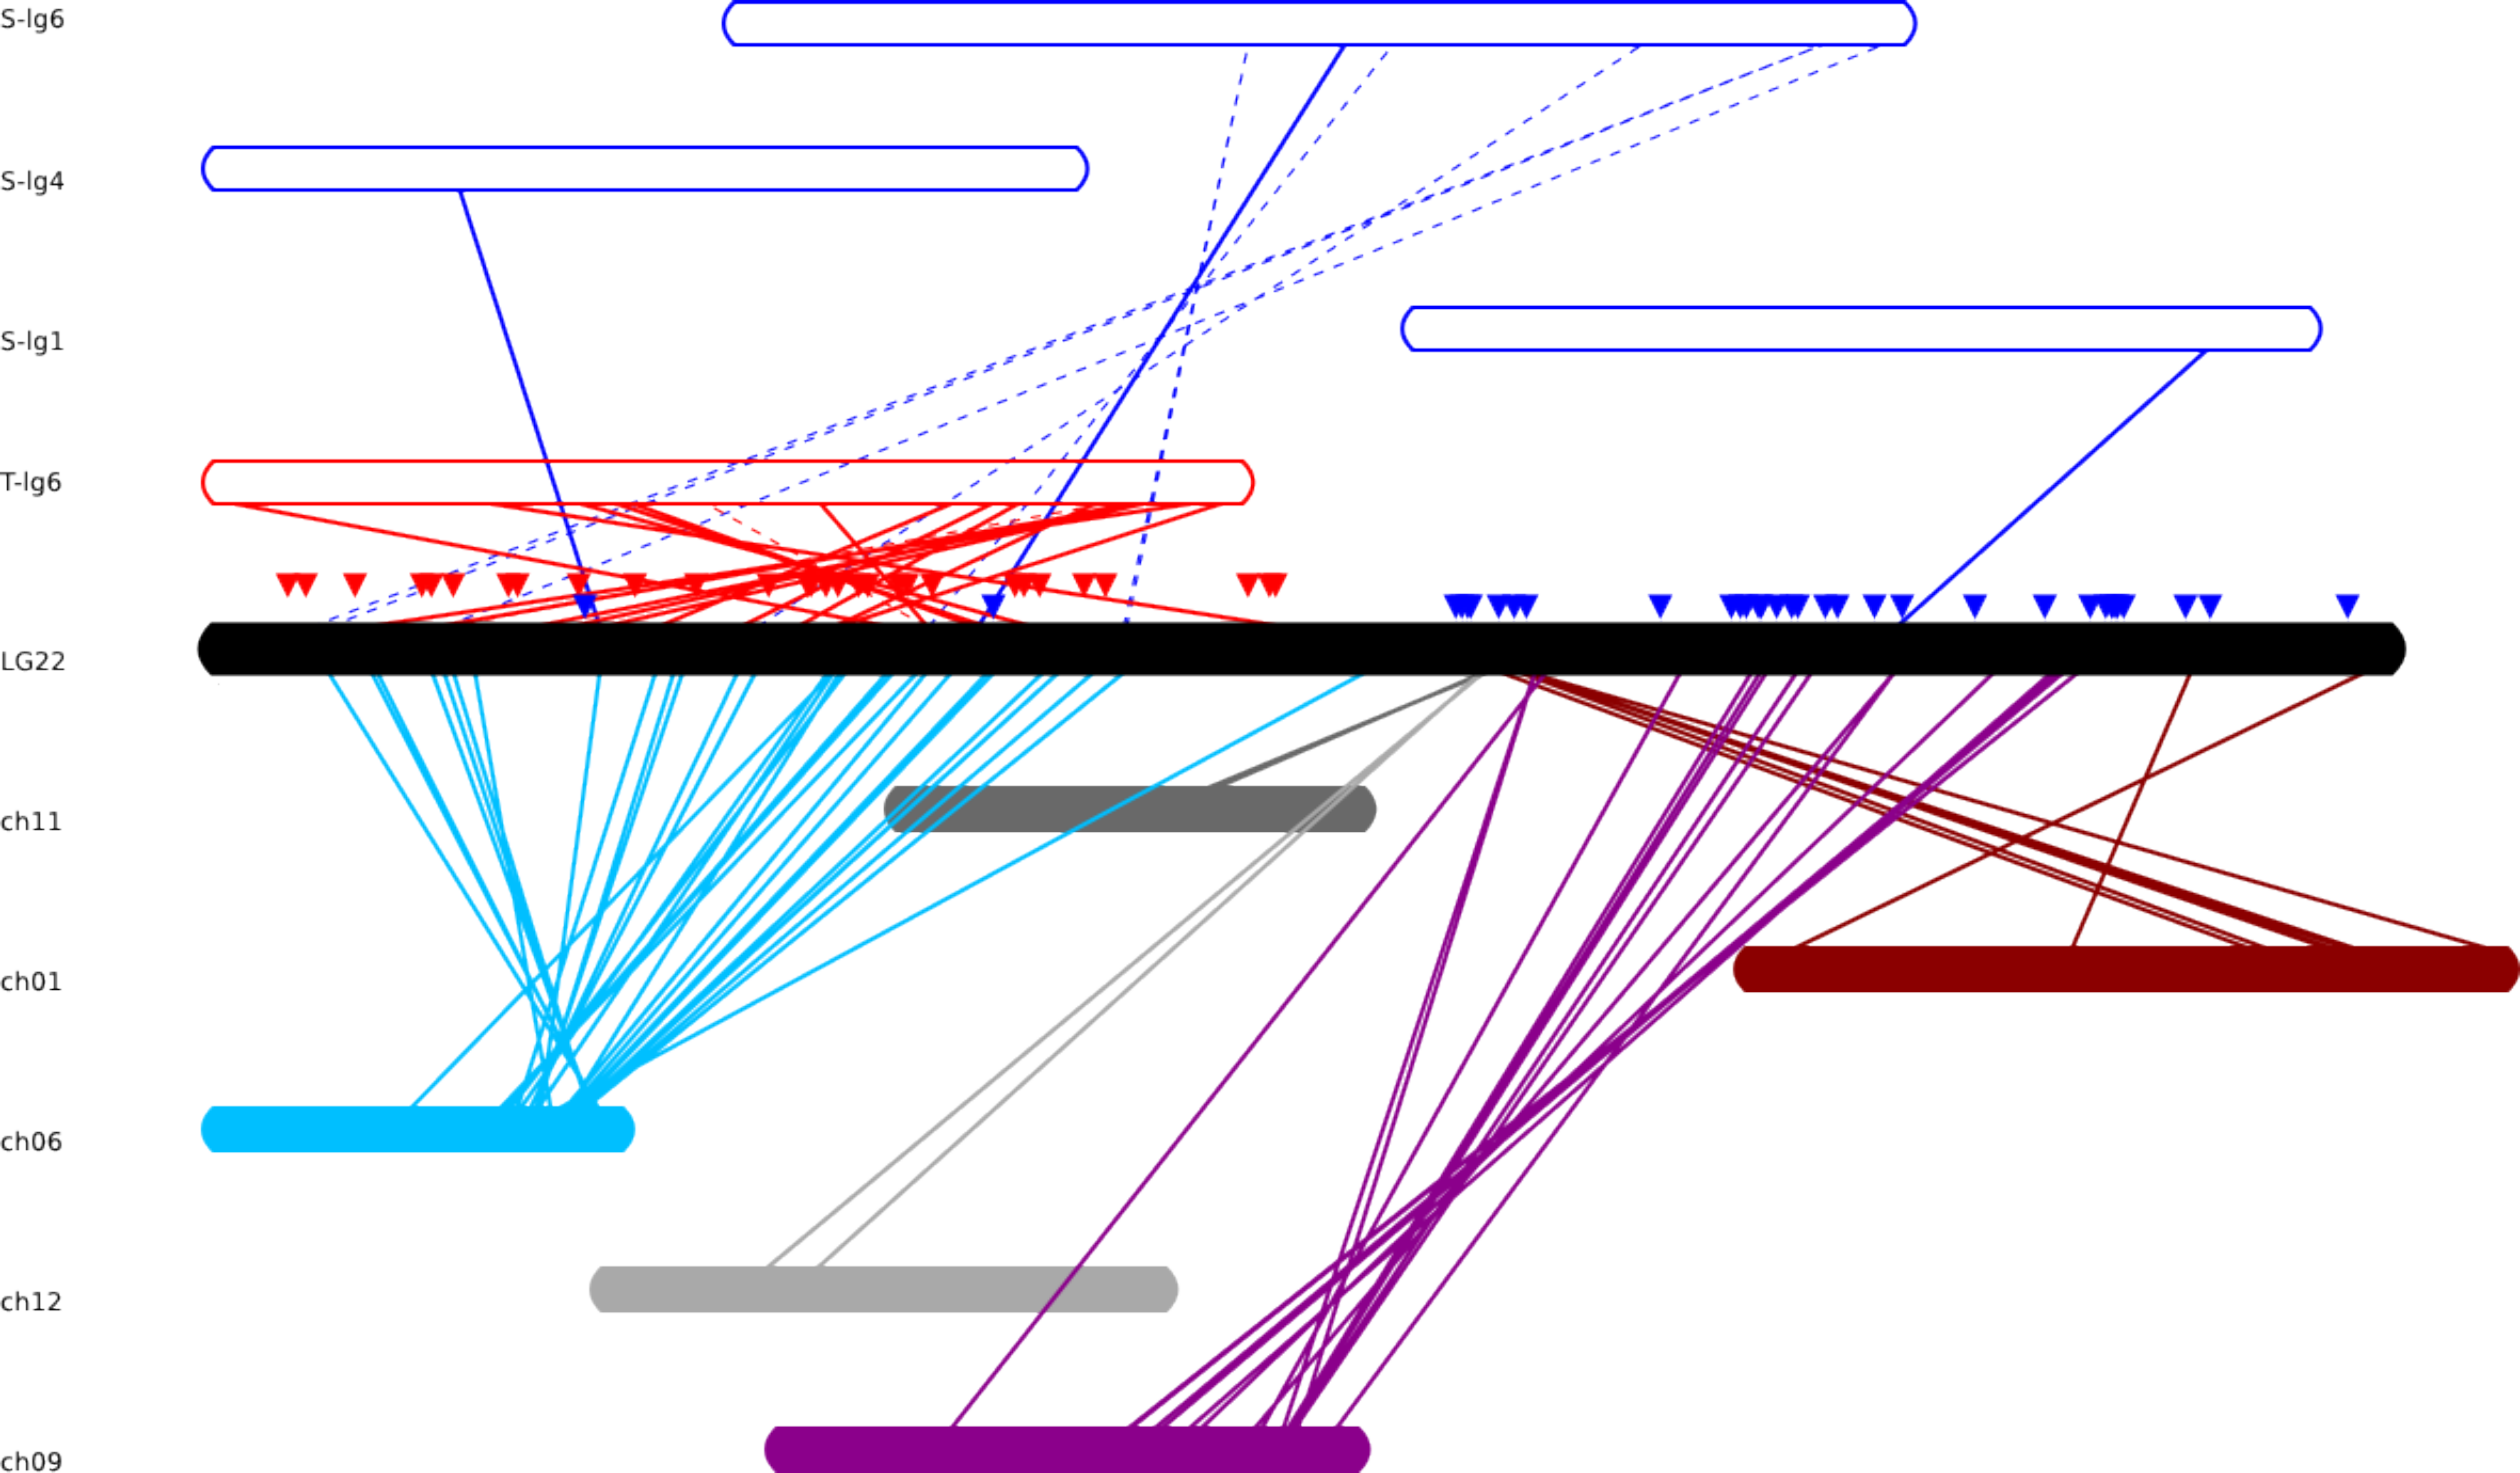

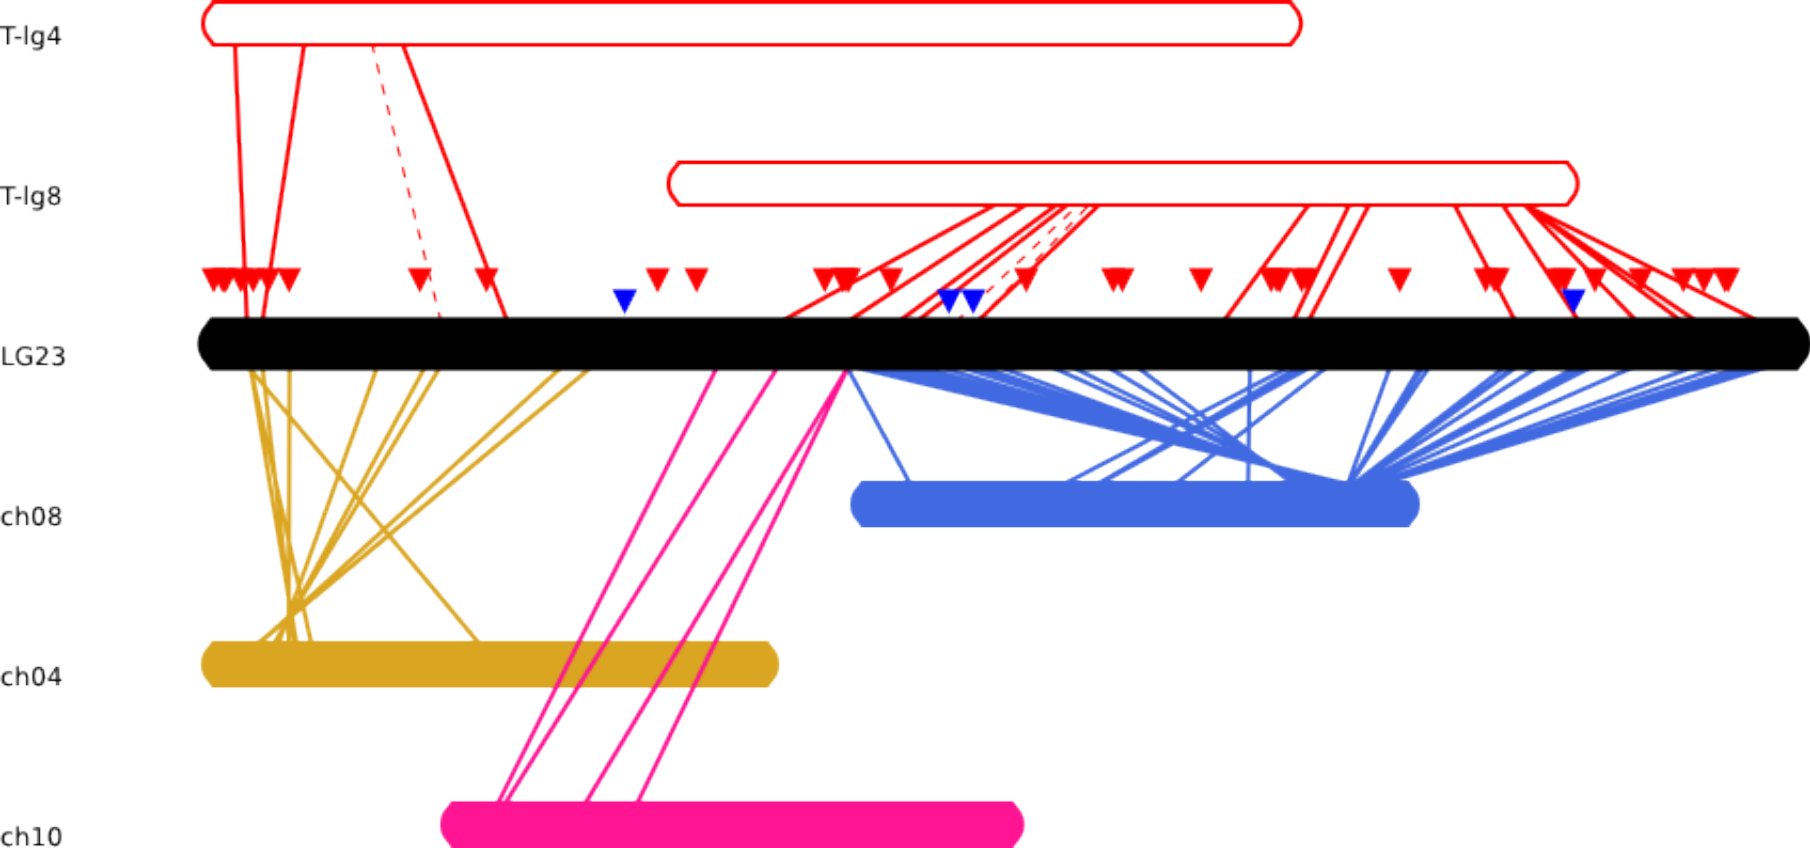

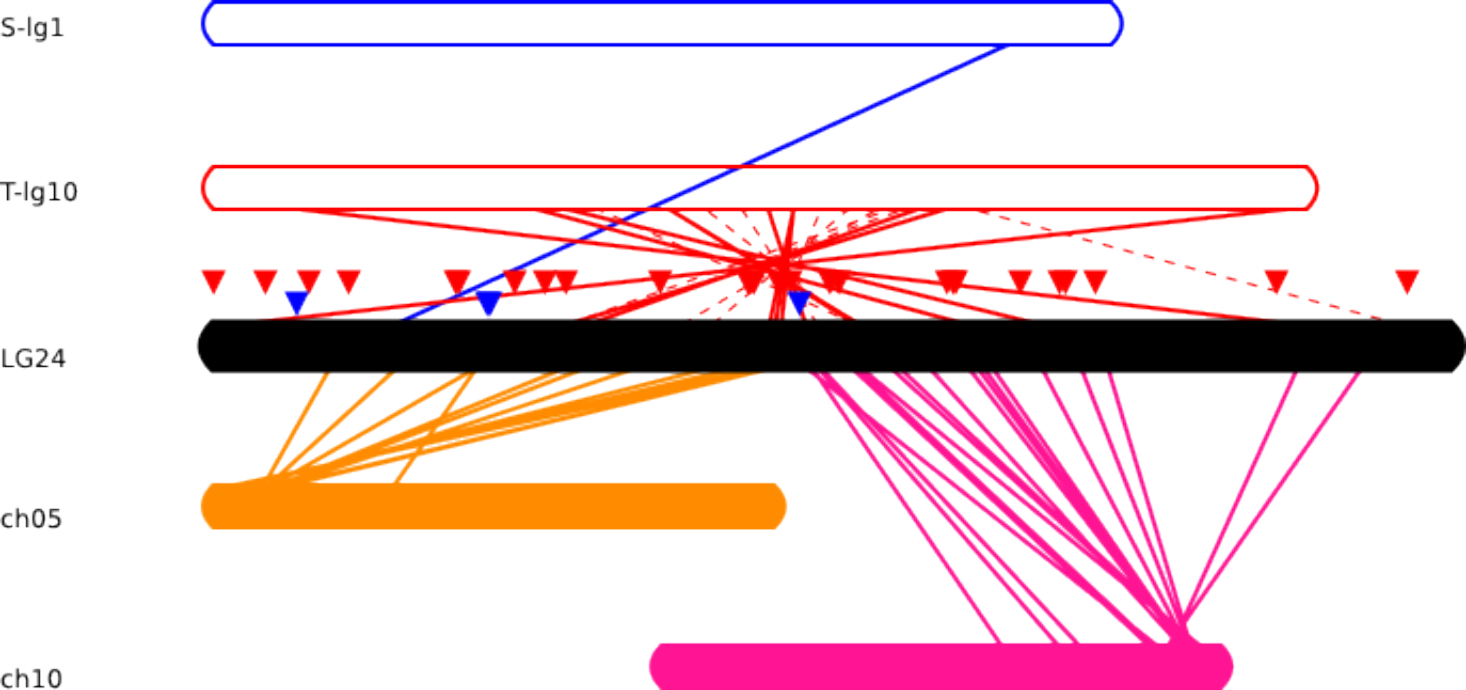

Supplement: ncomms4833-s3.pdf [file ncomms4833-s3.pdf]
