# Supplementary material for: The tobacco genome sequence and its comparison with those of tomato and potato
Source: PubMed Central journal article supplement (PMC4024737; doi:10.1038/ncomms4833), 2014-05-08

Tobacco lg1 and tomato ch01

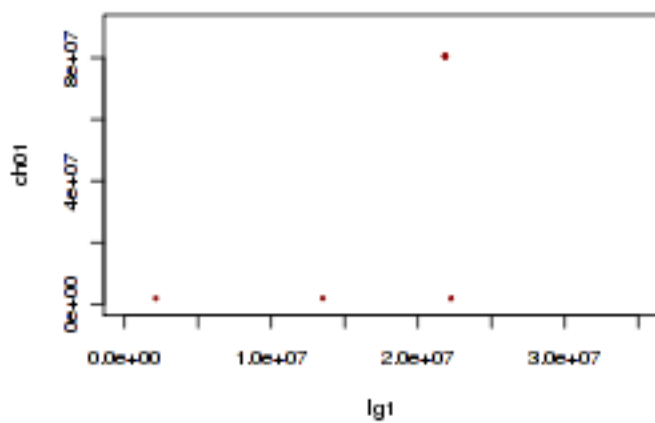

Tobacco lg1 and tomato ch02

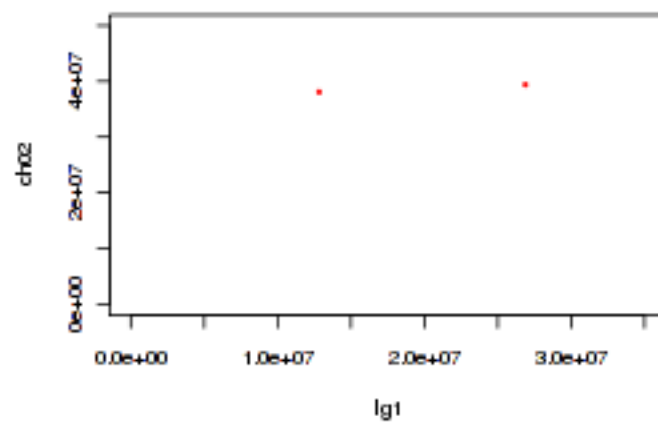

Tobacco lg1 and tomato ch03

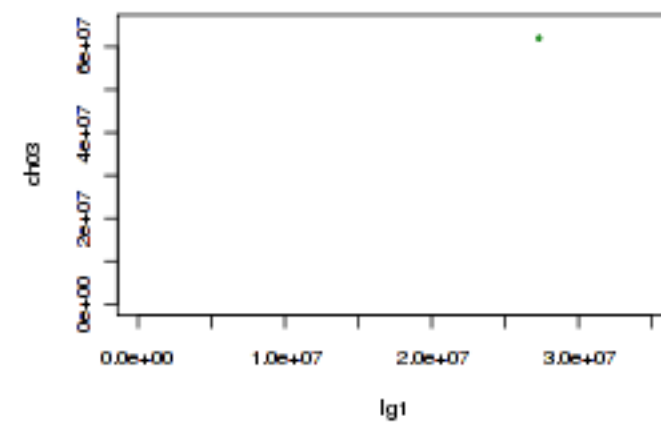

Tobacco lg1 and tomato ch04

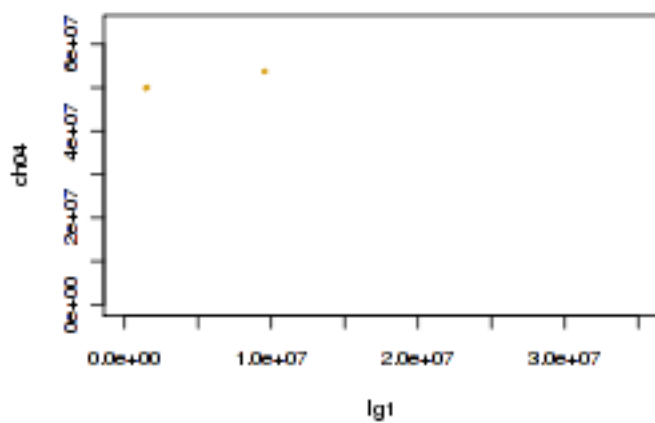

Tobacco lg1 and tomato ch05

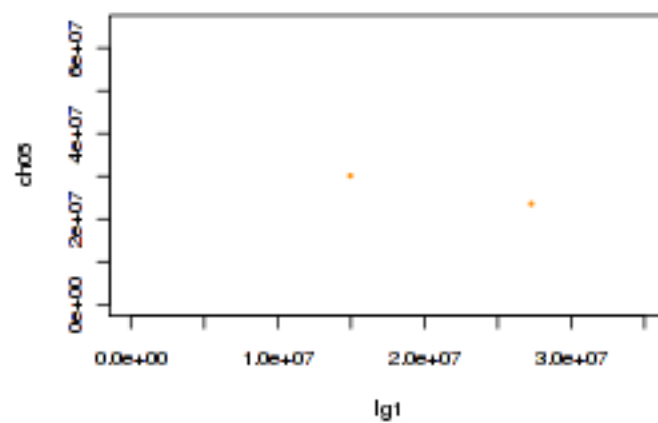

Tobacco lg1 and tomato ch06

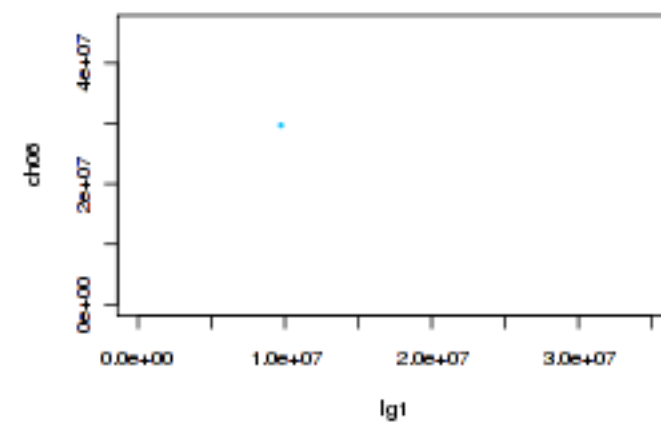

Tobacco lg1 and tomato ch07

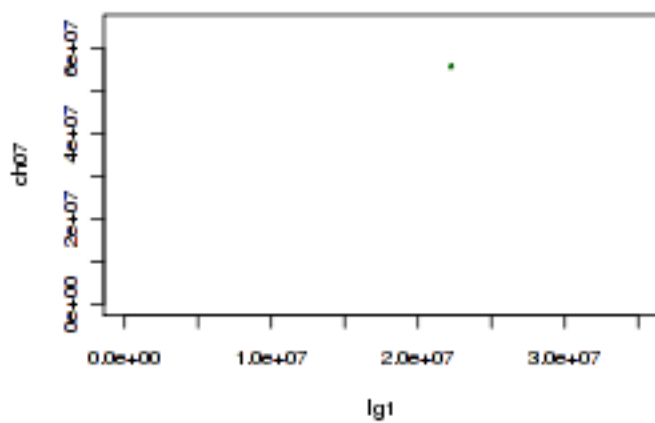

Tobacco lg1 and tomato ch08

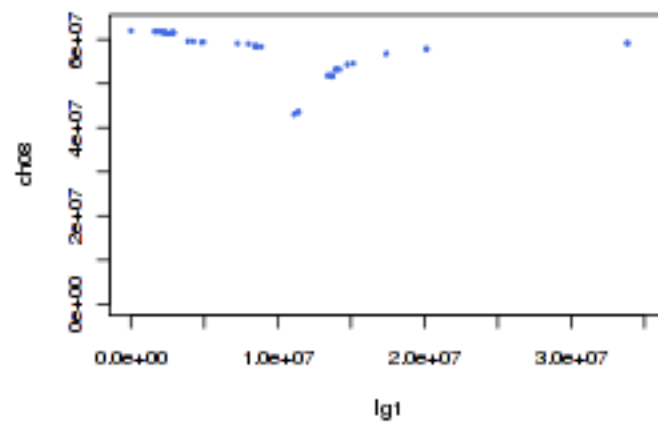

Tobacco lg1 and tomato ch09

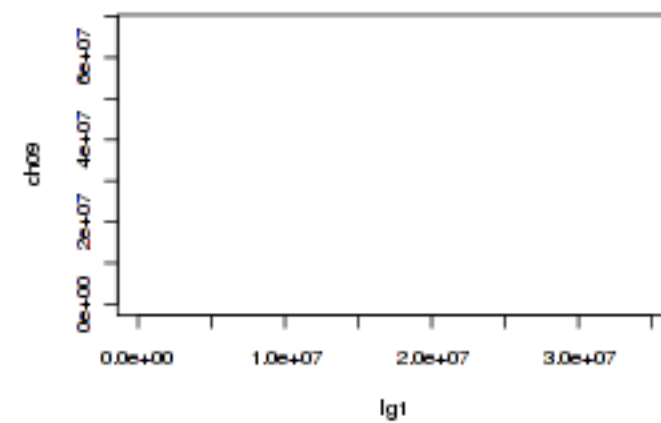

Tobacco lg1 and tomato ch10

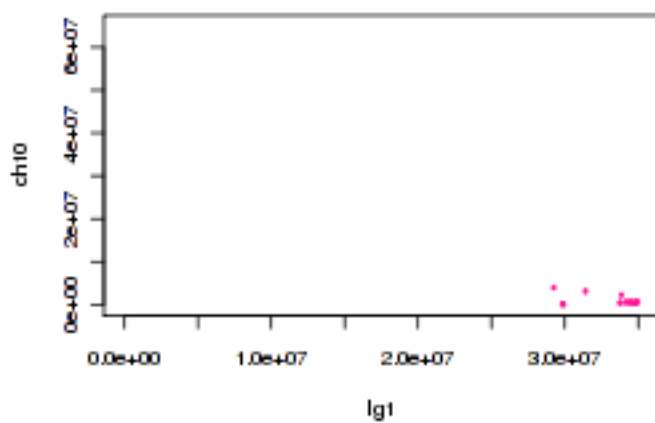

Tobacco lg1 and tomato ch11

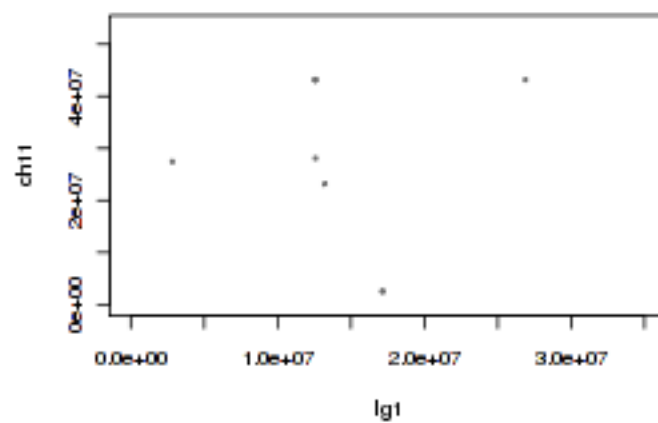

Tobacco lg1 and tomato ch12

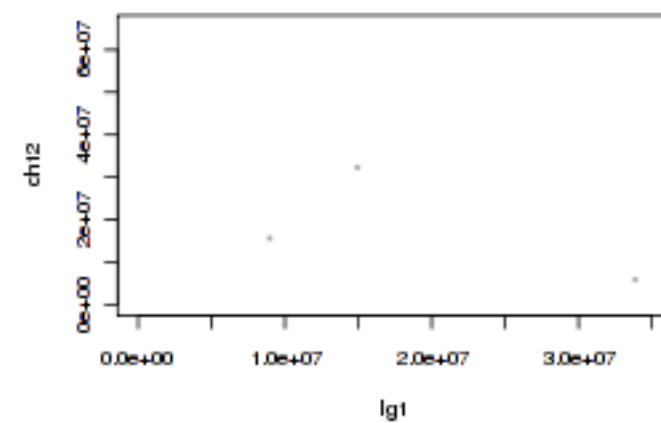

Tobacco lg2 and tomato ch01

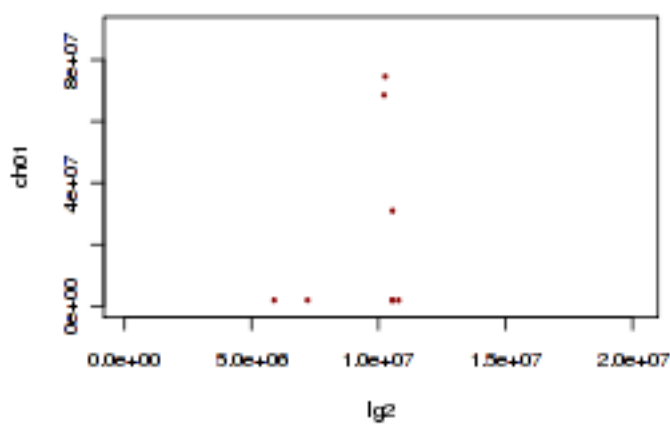

Tobacco lg2 and tomato ch02

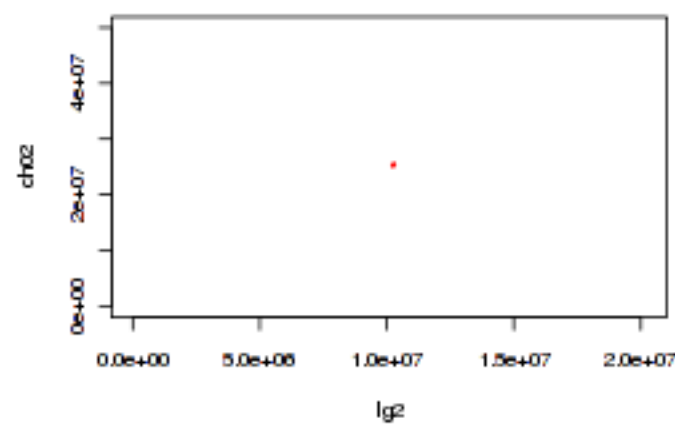

Tobacco lg2 and tomato ch03

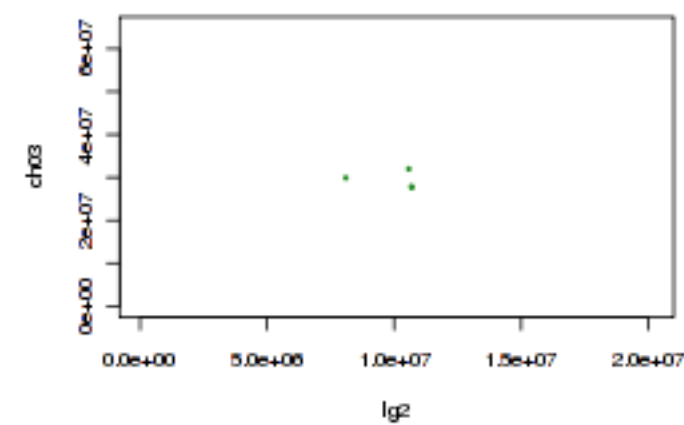

Tobacco lg2 and tomato ch04

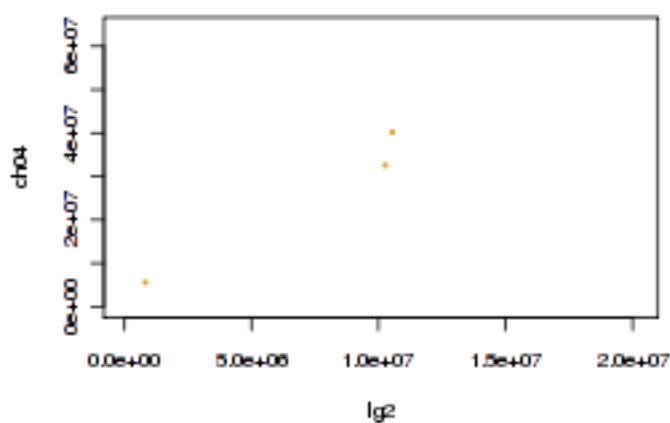

Tobacco lg2 and tomato ch05

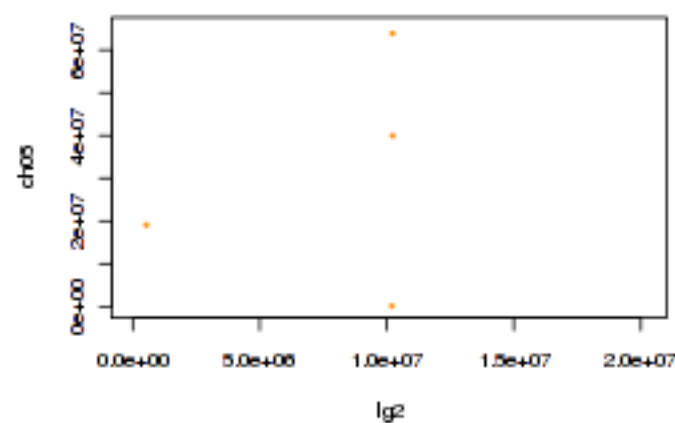

Tobacco lg2 and tomato ch06

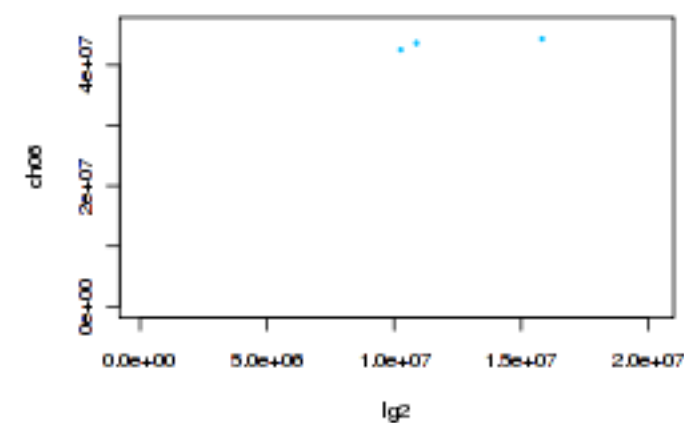

Tobacco lg2 and tomato ch07

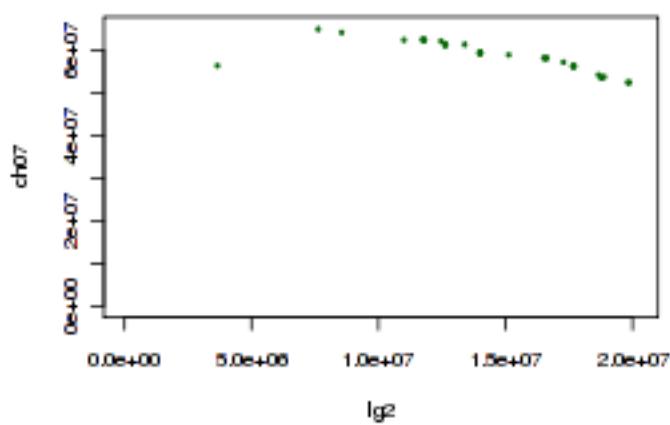

Tobacco lg2 and tomato ch08

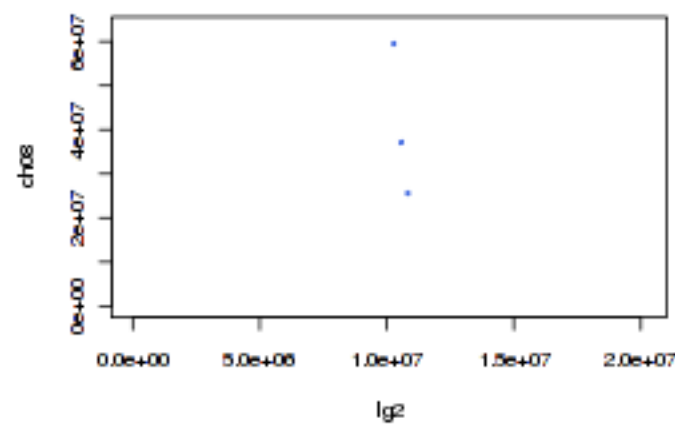

Tobacco lg2 and tomato ch09

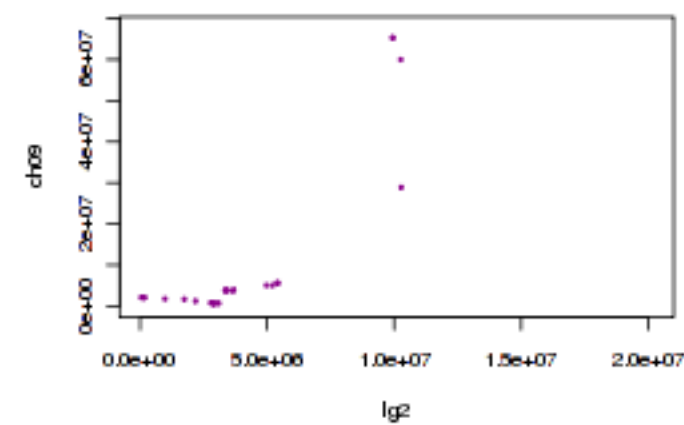

Tobacco lg2 and tomato ch10

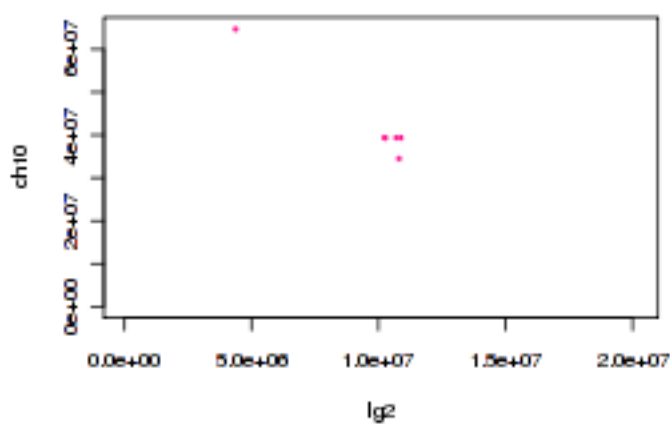

Tobacco lg2 and tomato ch11

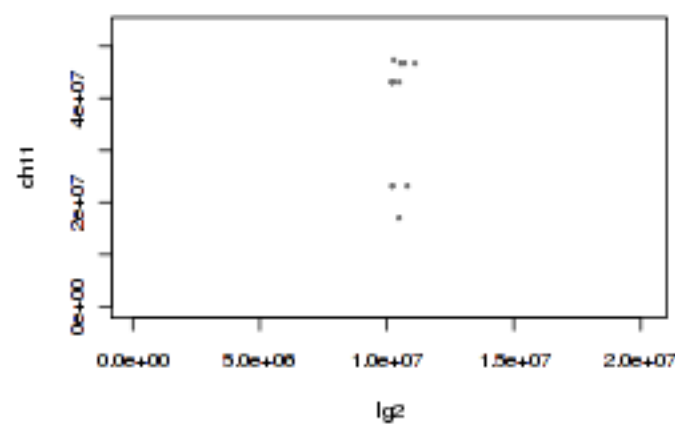

Tobacco lg2 and tomato ch12

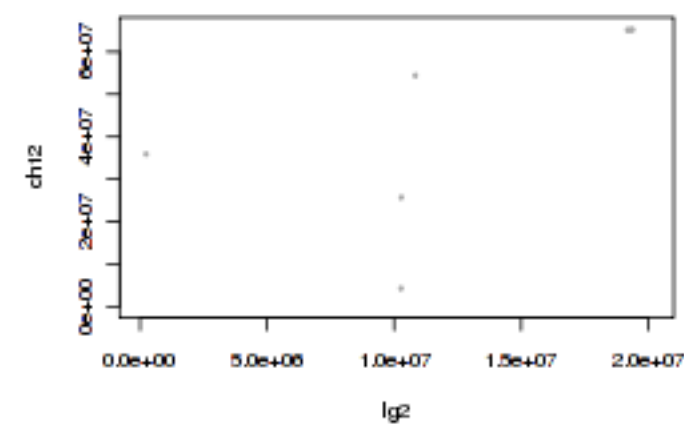

Tobacco Ig3 and tomato ch01

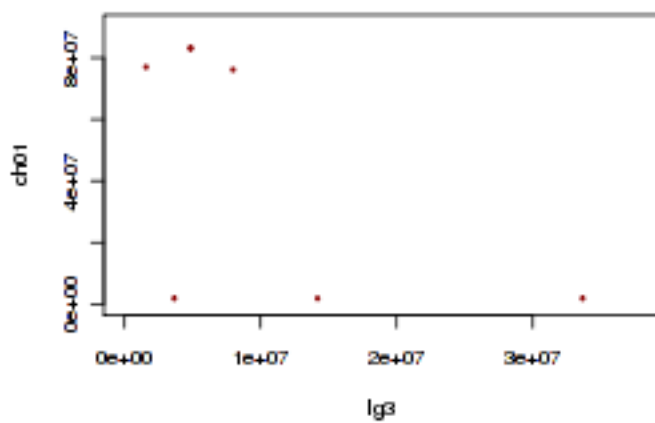

Tobacco Ig3 and tomato ch02

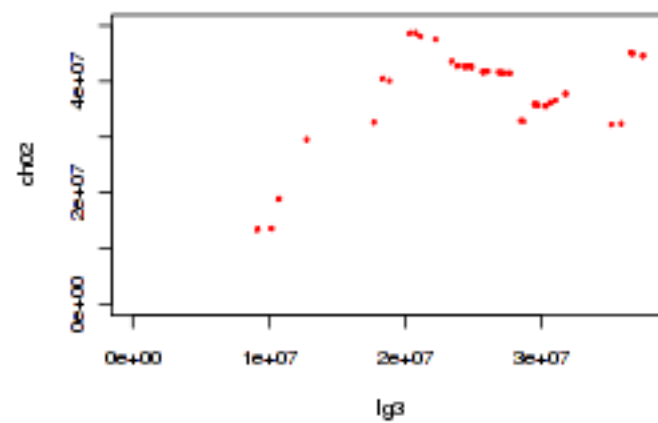

Tobacco Ig3 and tomato ch03

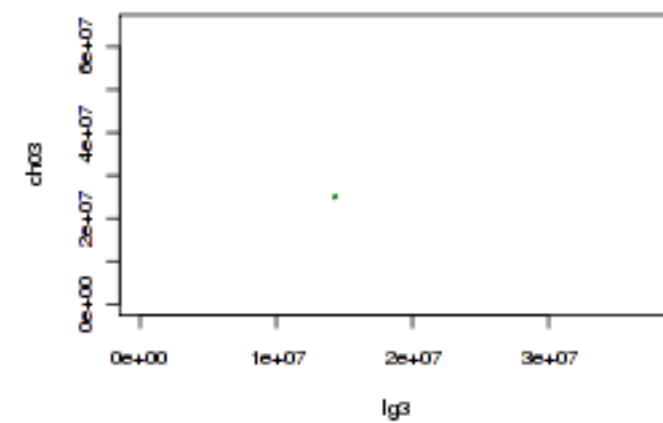

Tobacco Ig3 and tomato ch04

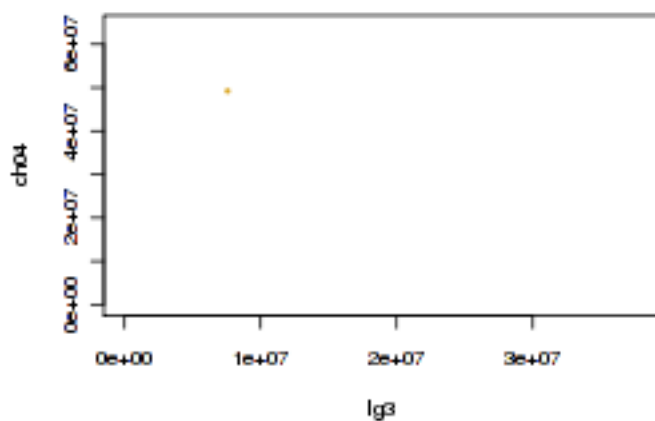

Tobacco Ig3 and tomato ch05

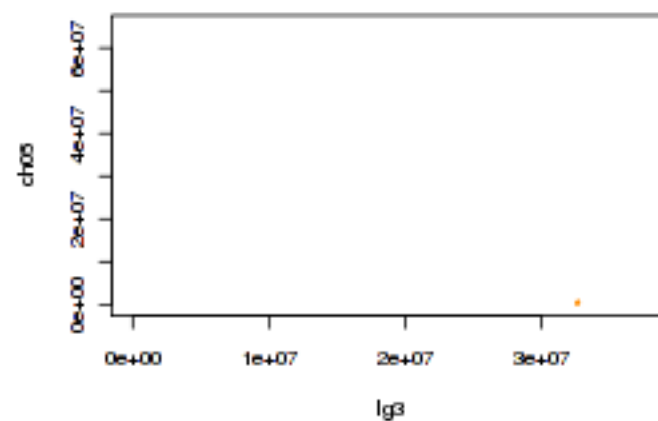

Tobacco Ig3 and tomato ch06

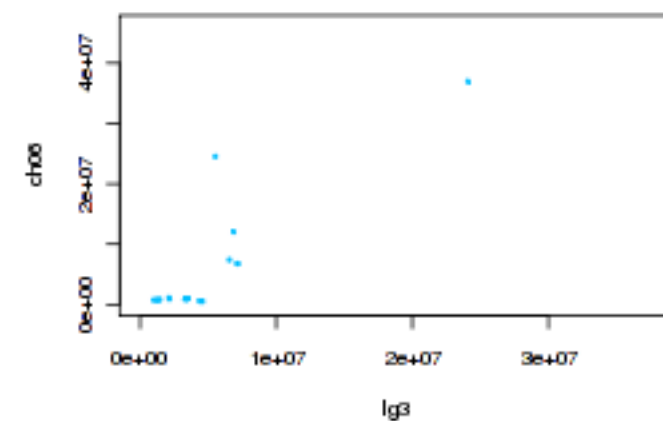

Tobacco Ig3 and tomato ch07

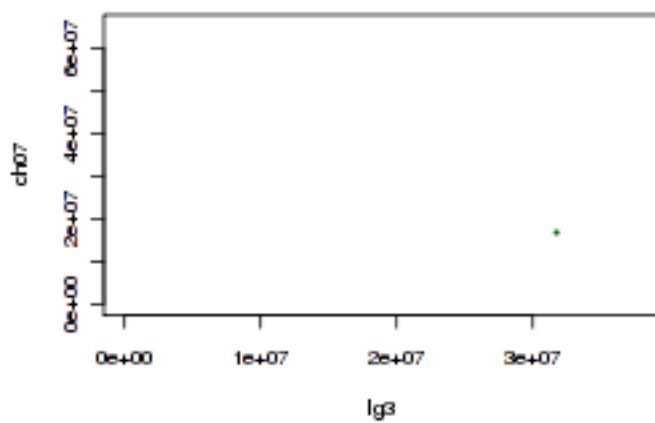

Tobacco Ig3 and tomato ch08

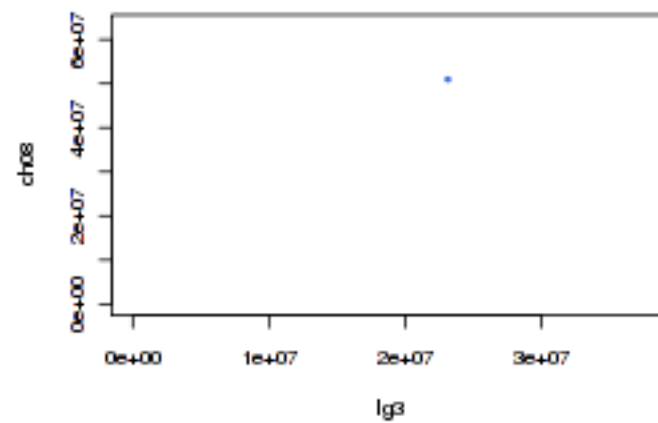

Tobacco Ig3 and tomato ch09

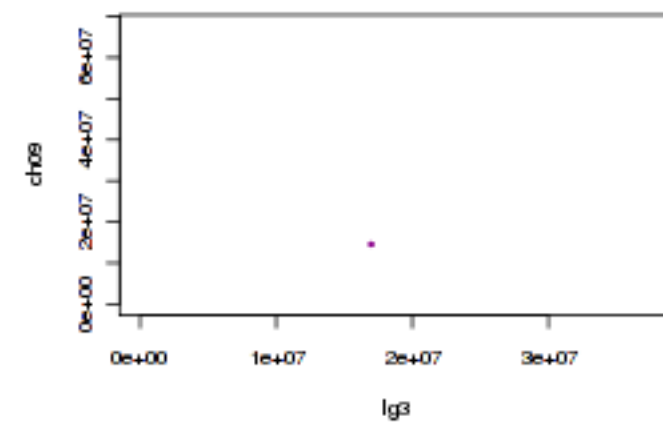

Tobacco Ig3 and tomato ch10

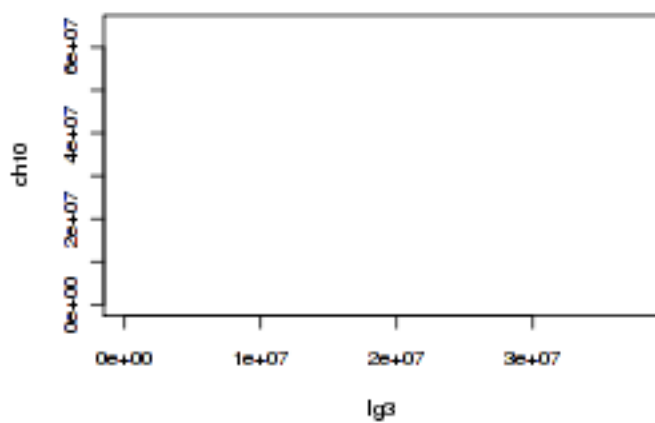

Tobacco Ig3 and tomato ch11

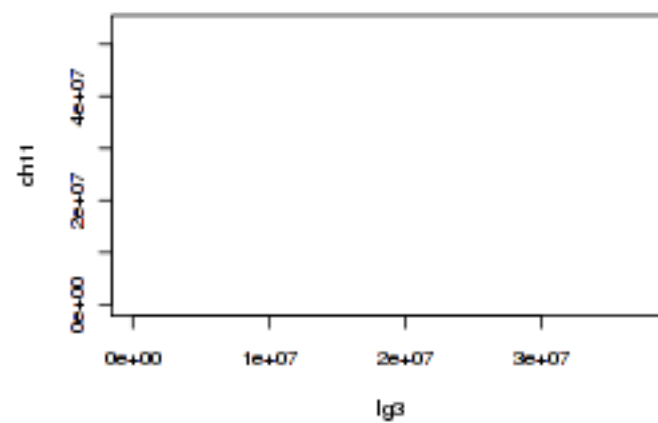

Tobacco Ig3 and tomato ch12

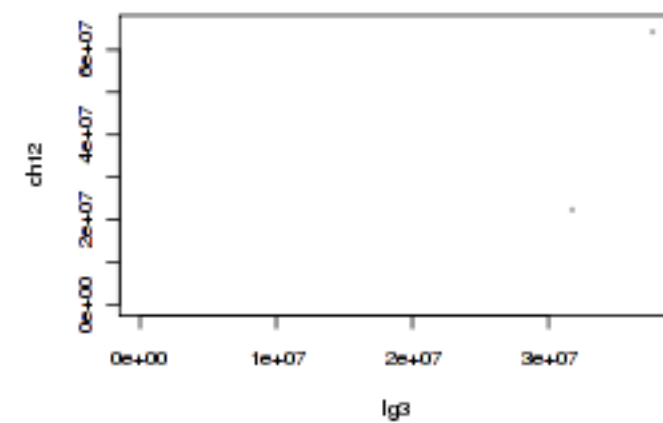

Tobacco lg4 and tomato ch01

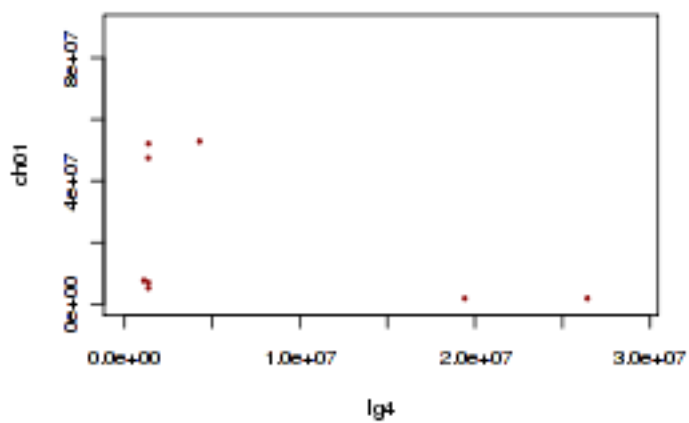

Tobacco lg4 and tomato ch02

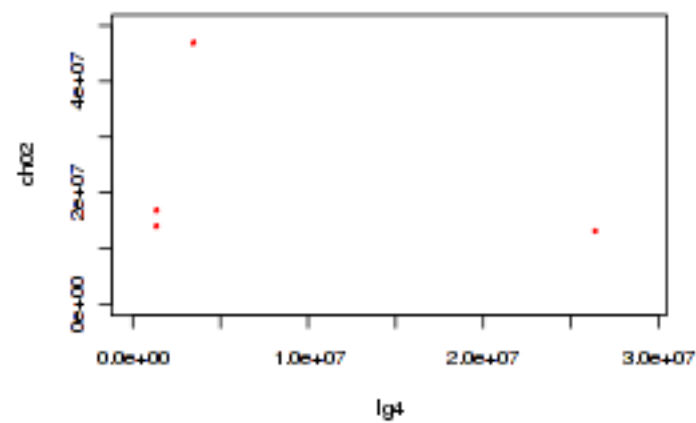

Tobacco lg4 and tomato ch03

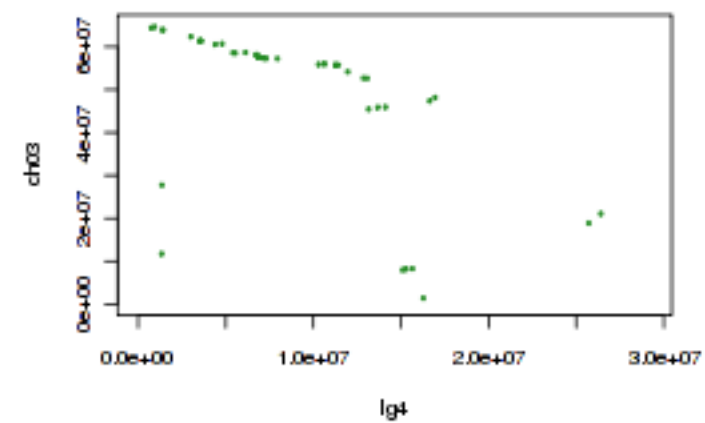

Tobacco lg4 and tomato ch04

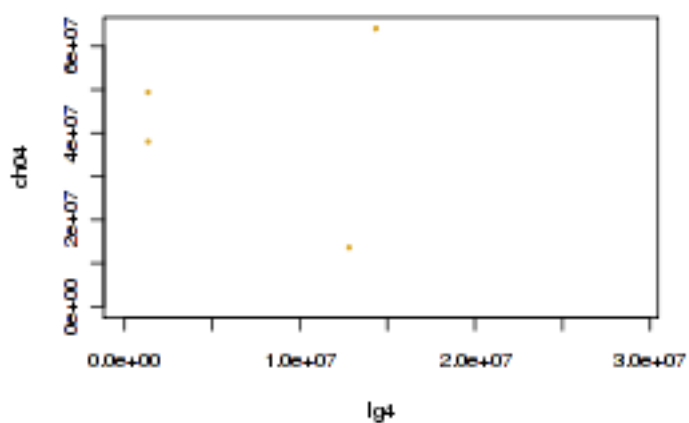

Tobacco lg4 and tomato ch05

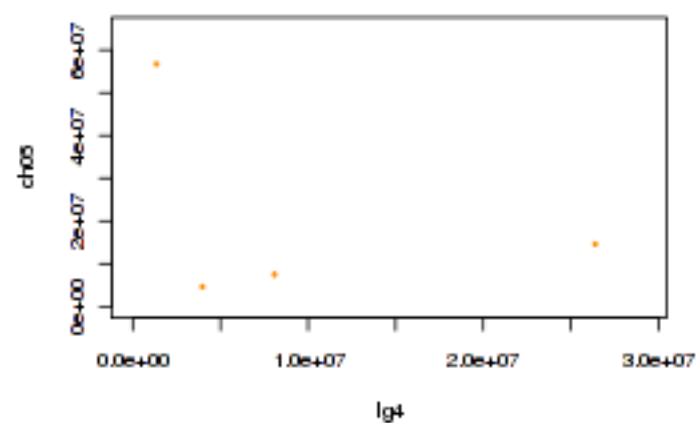

Tobacco lg4 and tomato ch06

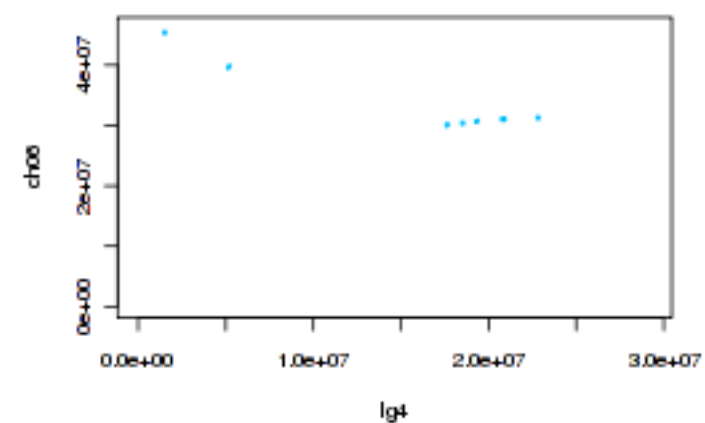

Tobacco lg4 and tomato ch07

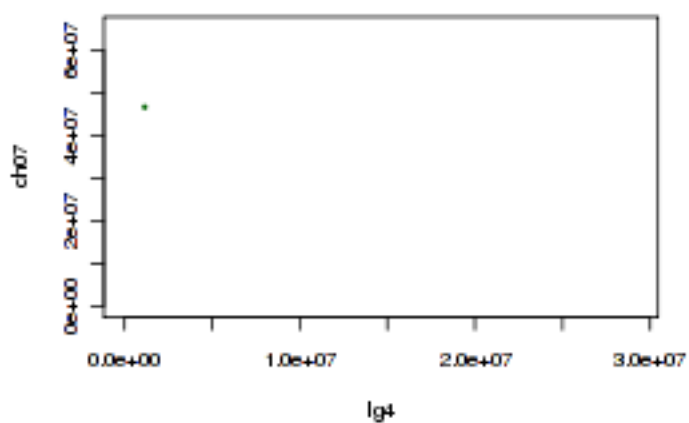

Tobacco lg4 and tomato ch08

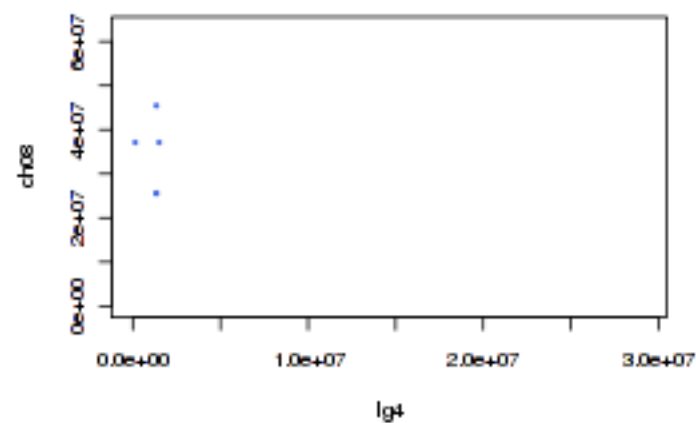

Tobacco lg4 and tomato ch09

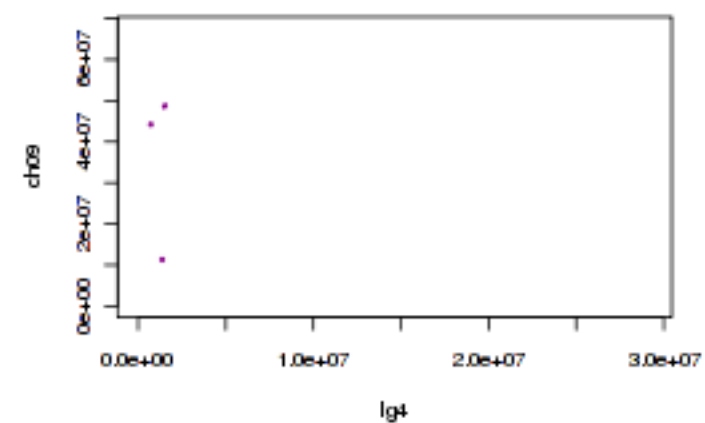

Tobacco lg4 and tomato ch10

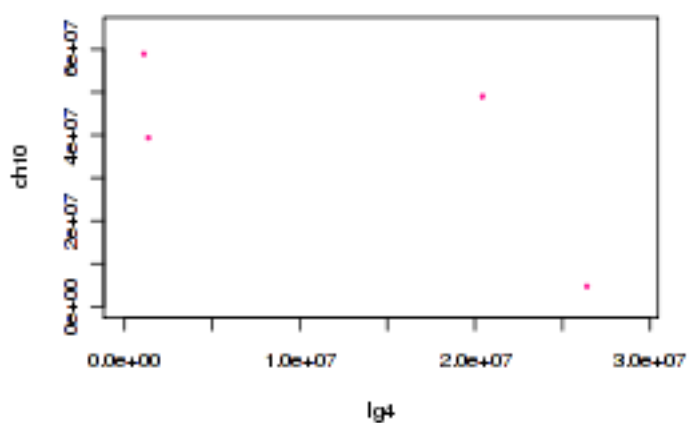

Tobacco lg4 and tomato ch11

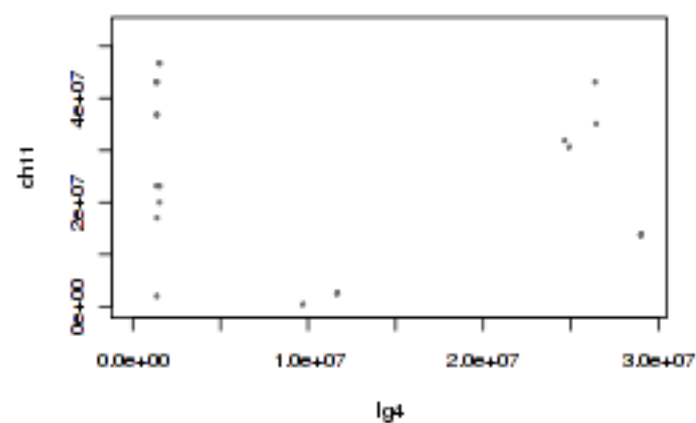

Tobacco lg4 and tomato ch12

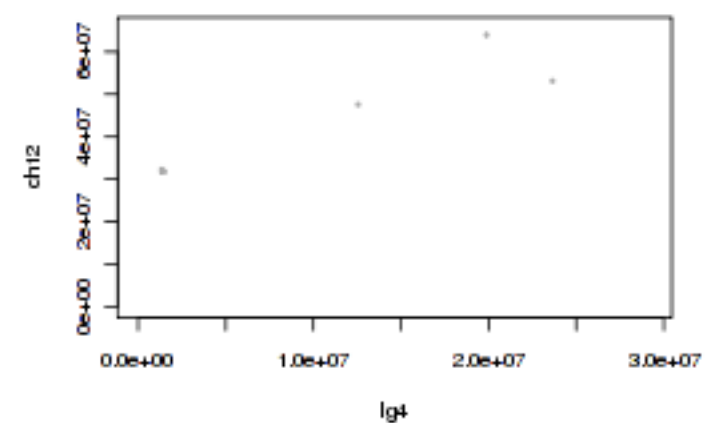

Tobacco lg5 and tomato ch01

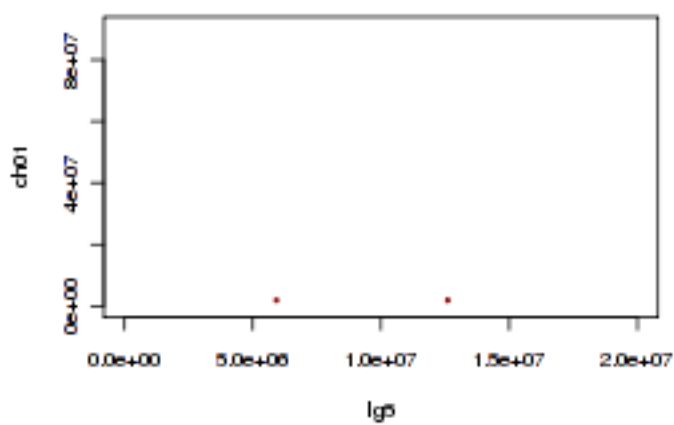

Tobacco lg5 and tomato ch02

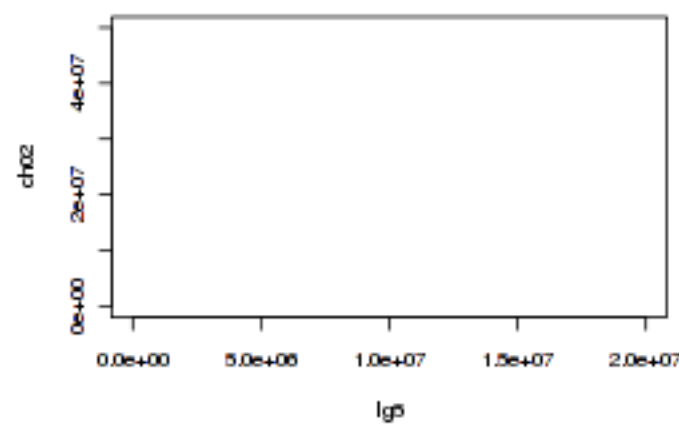

Tobacco lg5 and tomato ch03

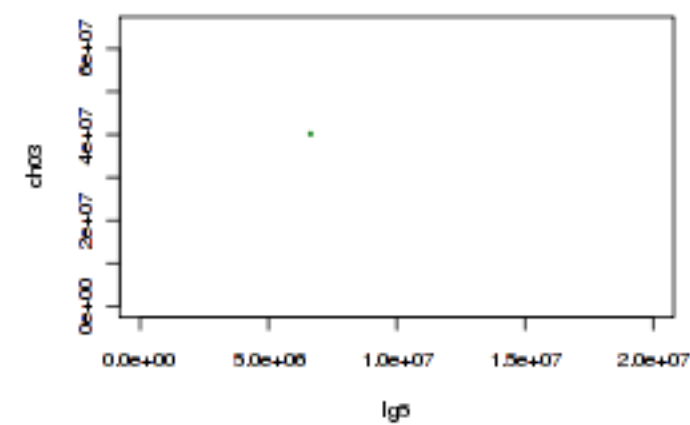

Tobacco lg5 and tomato ch04

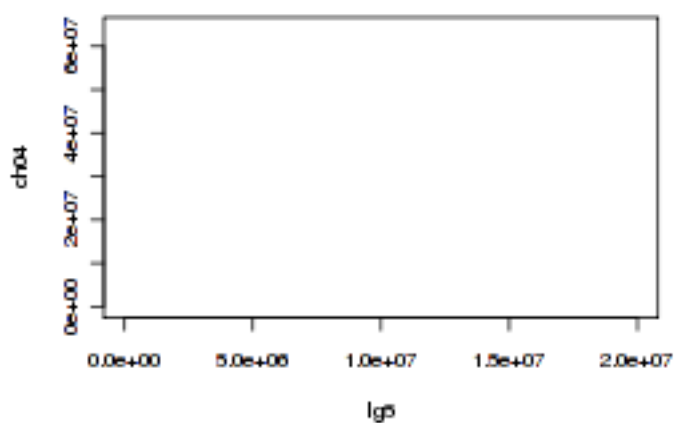

Tobacco lg5 and tomato ch05

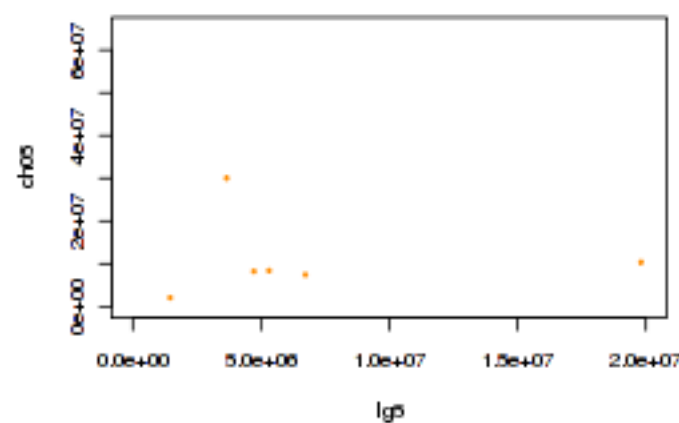

Tobacco lg5 and tomato ch06

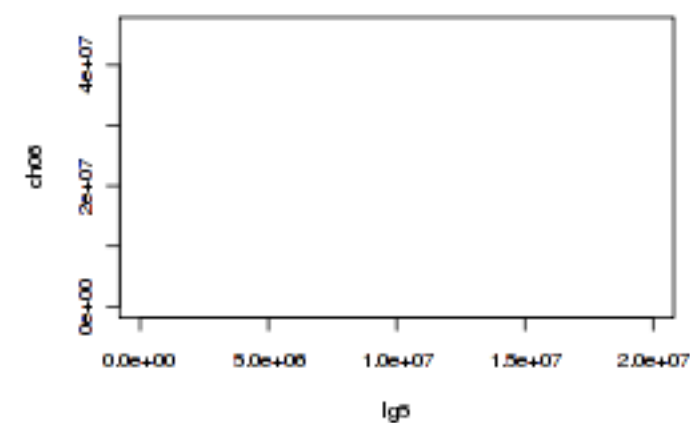

Tobacco lg5 and tomato ch07

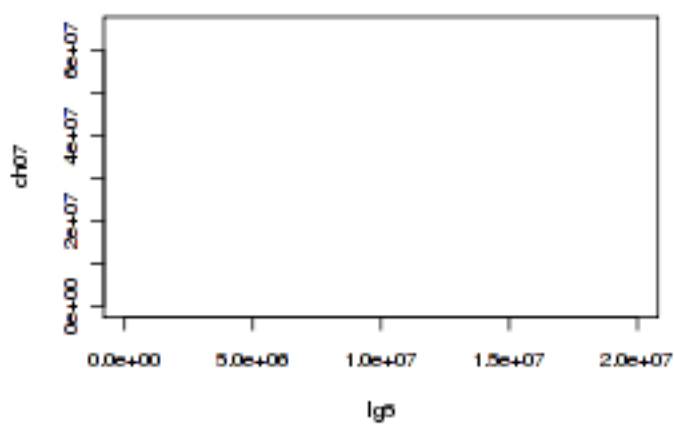

Tobacco lg5 and tomato ch08

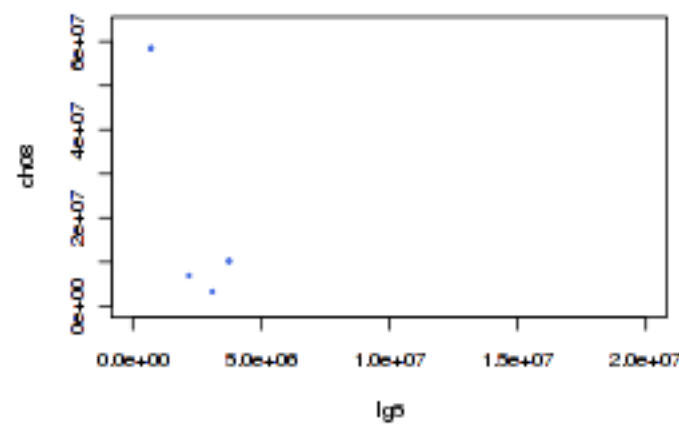

Tobacco lg5 and tomato ch09

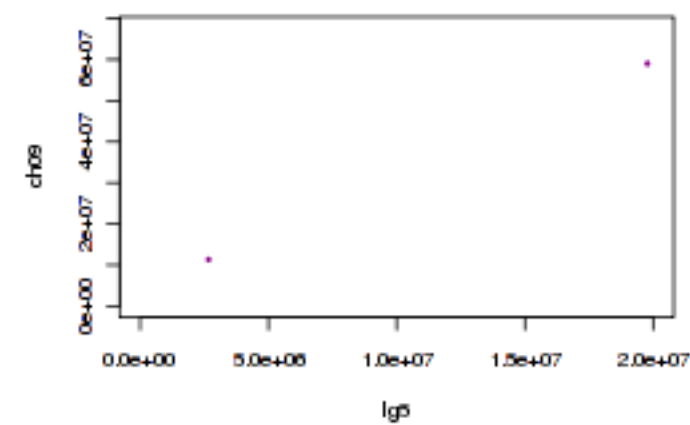

Tobacco lg5 and tomato ch10

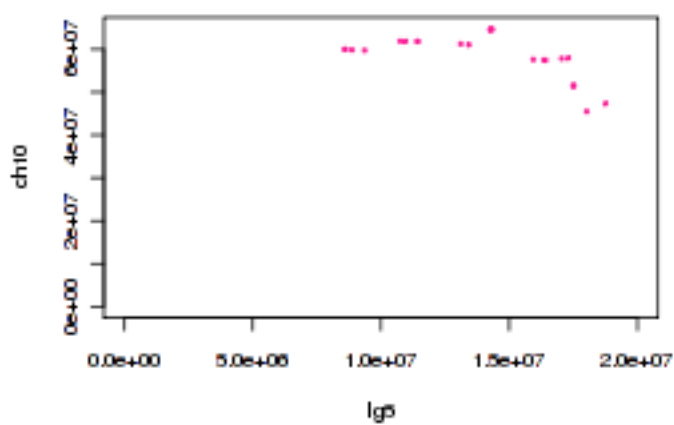

Tobacco lg5 and tomato ch11

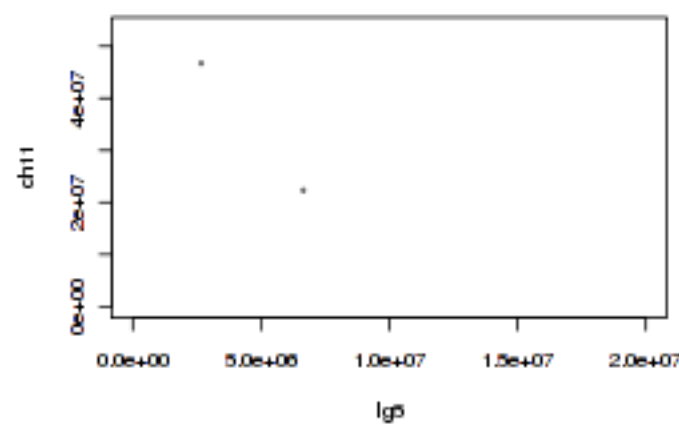

Tobacco lg5 and tomato ch12

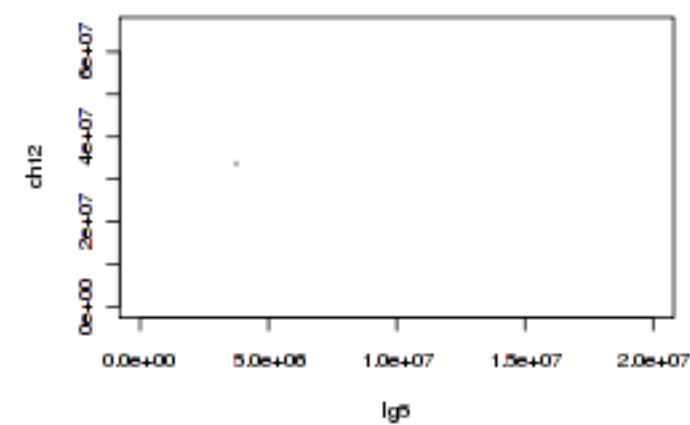

Tobacco Ig6 and tomato ch01

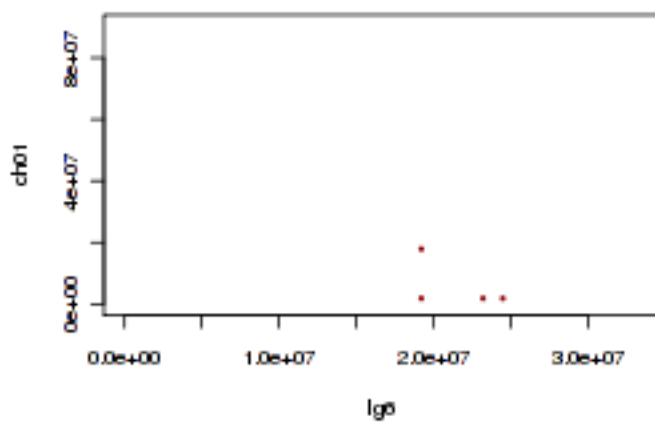

Tobacco Ig6 and tomato ch02

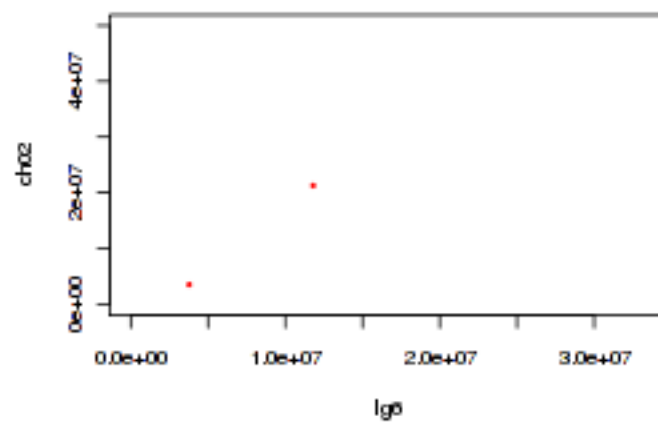

Tobacco Ig6 and tomato ch03

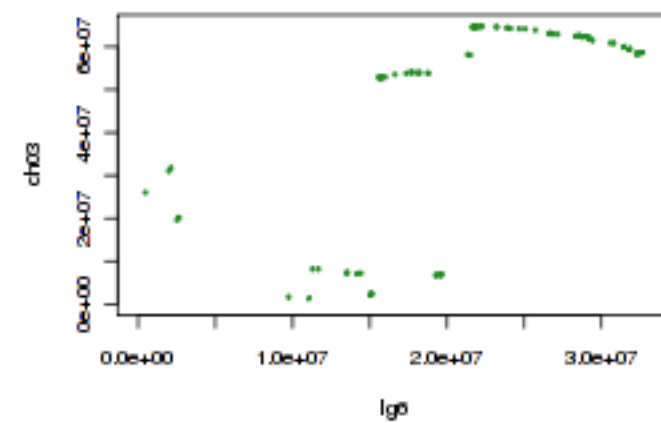

Tobacco Ig6 and tomato ch04

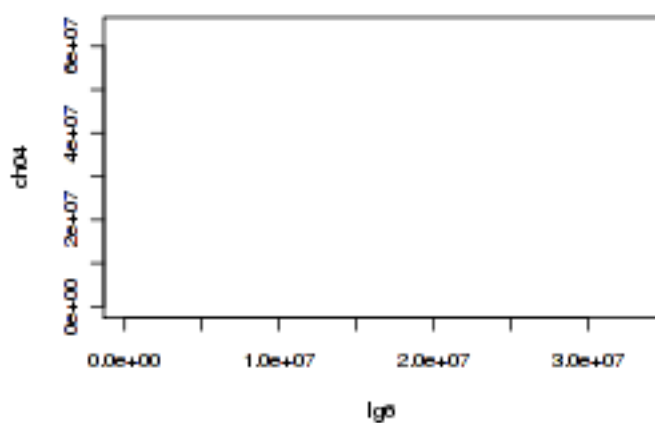

Tobacco Ig6 and tomato ch05

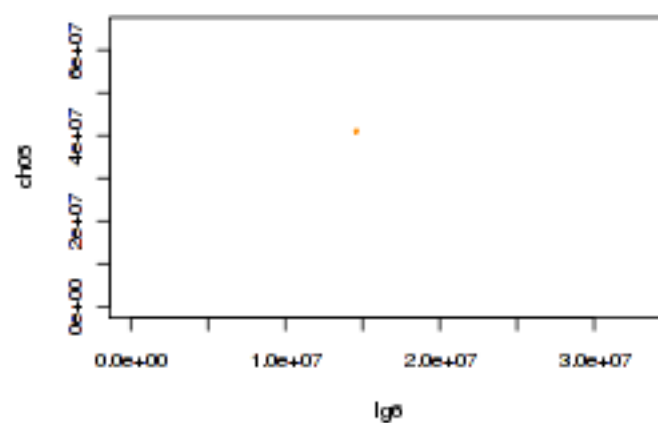

Tobacco Ig6 and tomato ch06

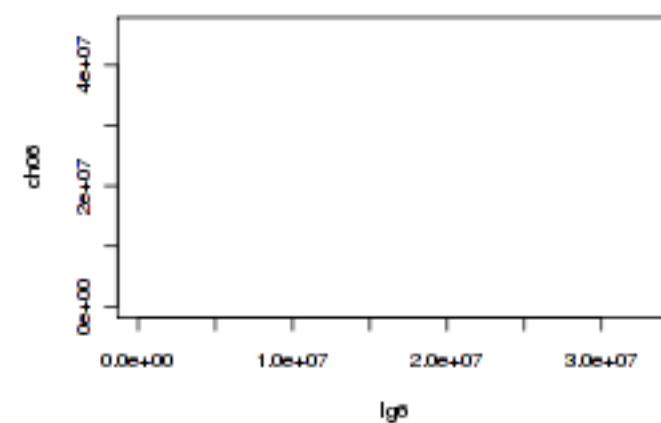

Tobacco Ig6 and tomato ch07

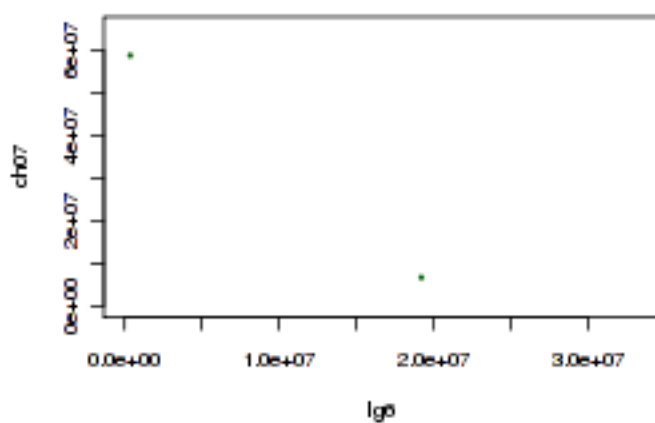

Tobacco Ig6 and tomato ch08

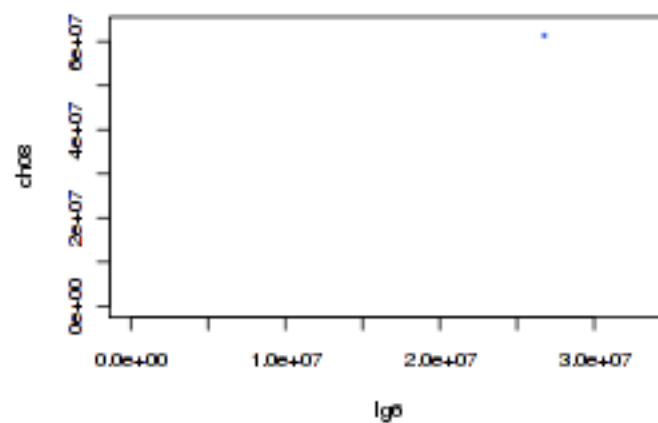

Tobacco Ig6 and tomato ch09

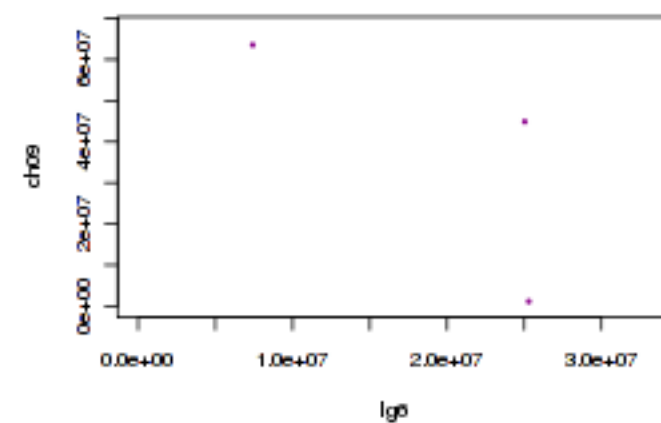

Tobacco Ig6 and tomato ch10

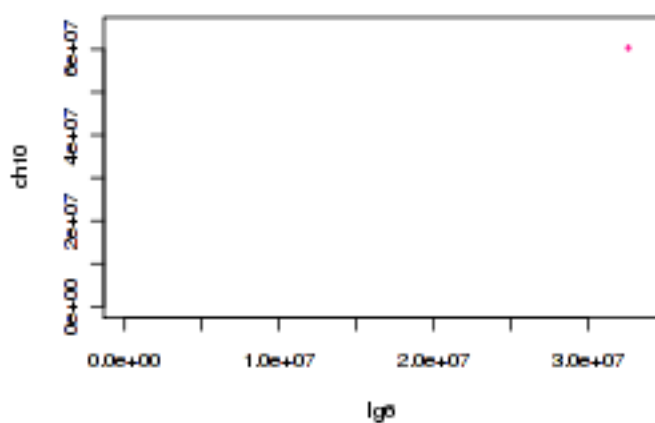

Tobacco Ig6 and tomato ch11

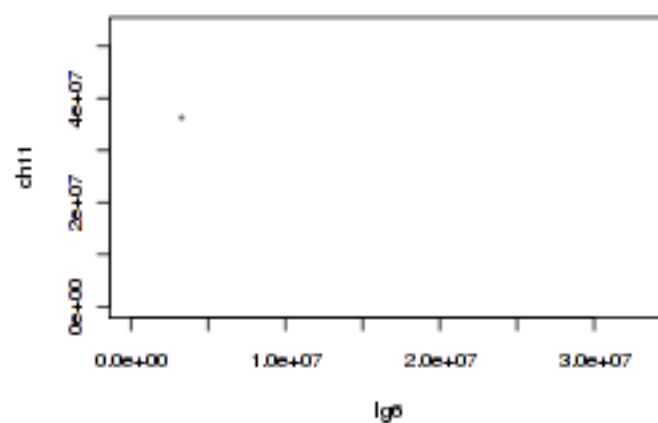

Tobacco Ig6 and tomato ch12

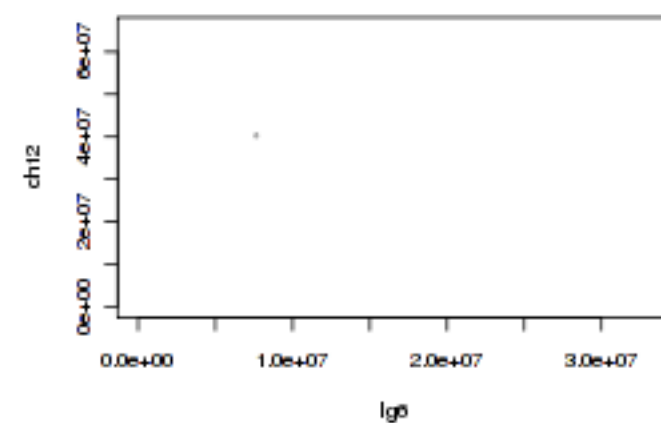

Tobacco lg7 and tomato ch01

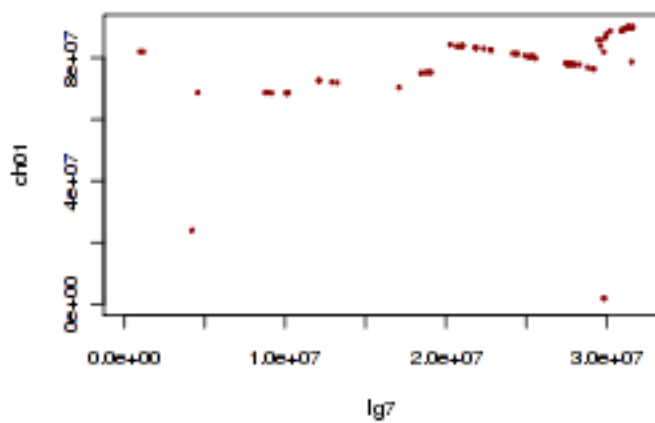

Tobacco lg7 and tomato ch02

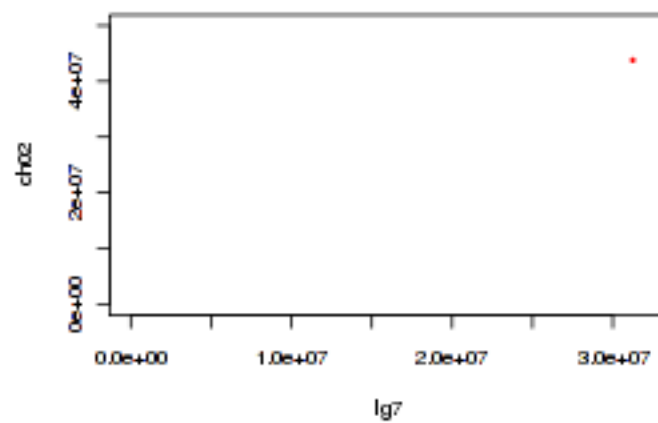

Tobacco lg7 and tomato ch03

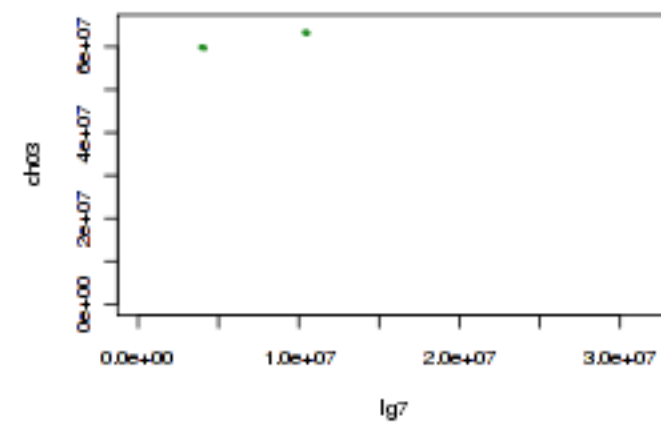

Tobacco lg7 and tomato ch04

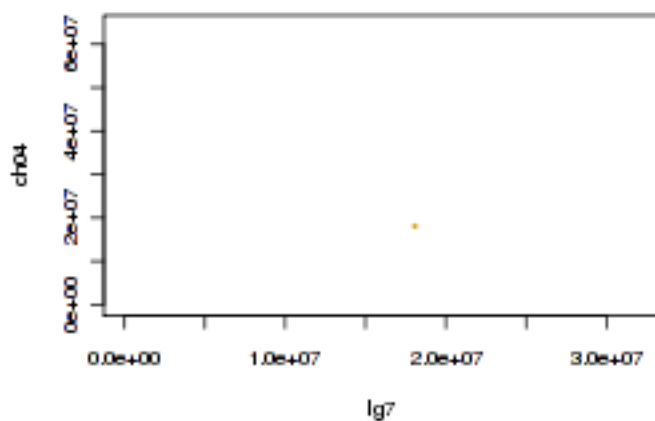

Tobacco lg7 and tomato ch05

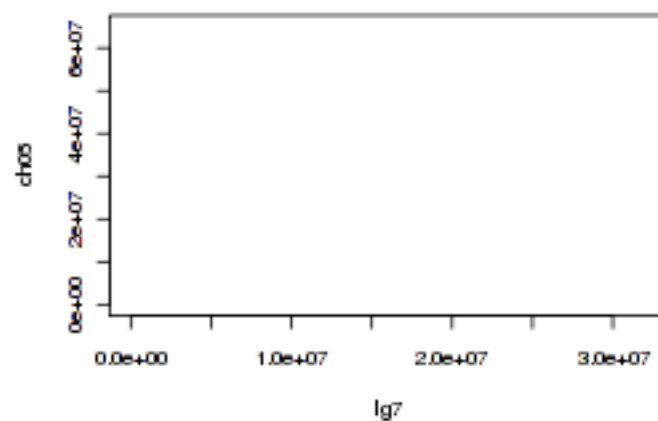

Tobacco lg7 and tomato ch06

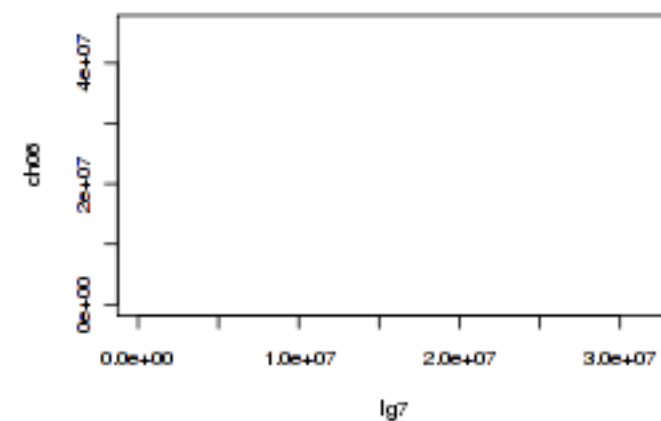

Tobacco lg7 and tomato ch07

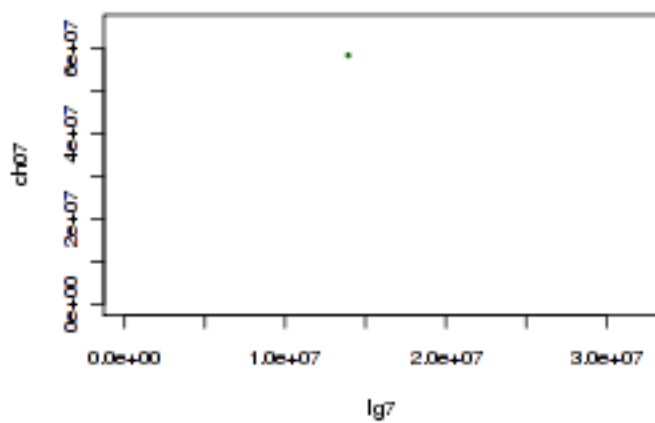

Tobacco lg7 and tomato ch08

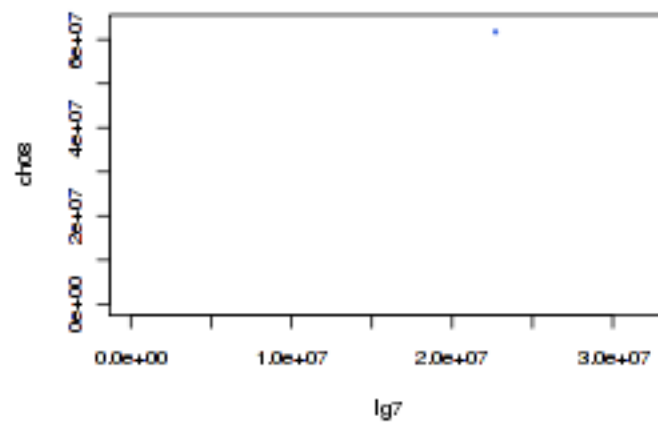

Tobacco lg7 and tomato ch09

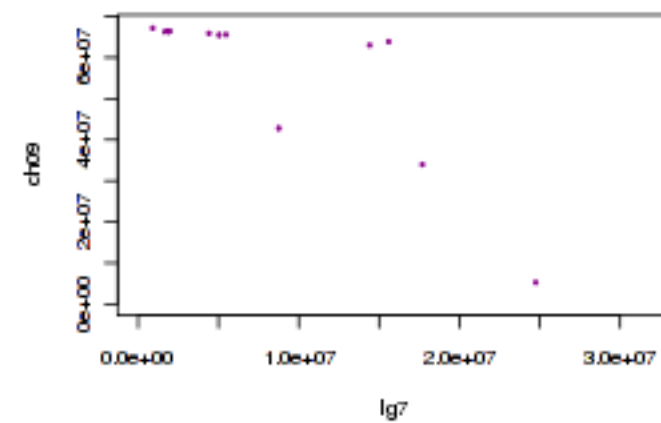

Tobacco lg7 and tomato ch10

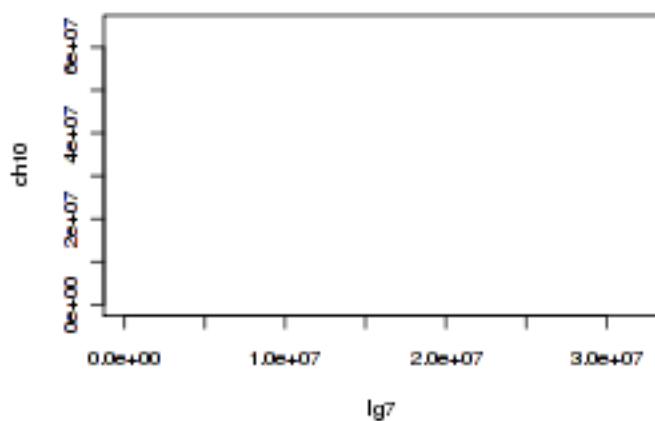

Tobacco lg7 and tomato ch11

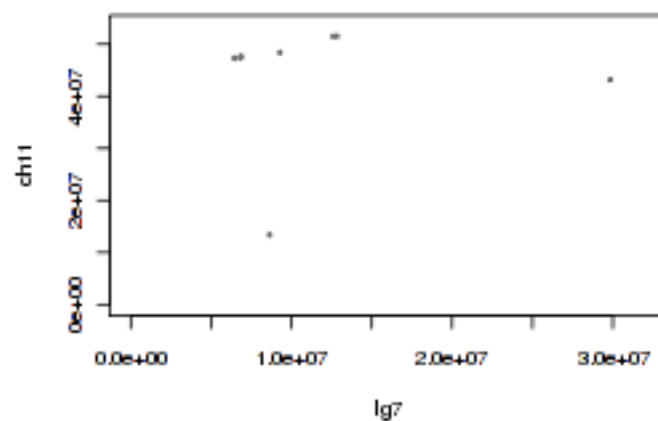

Tobacco lg7 and tomato ch12

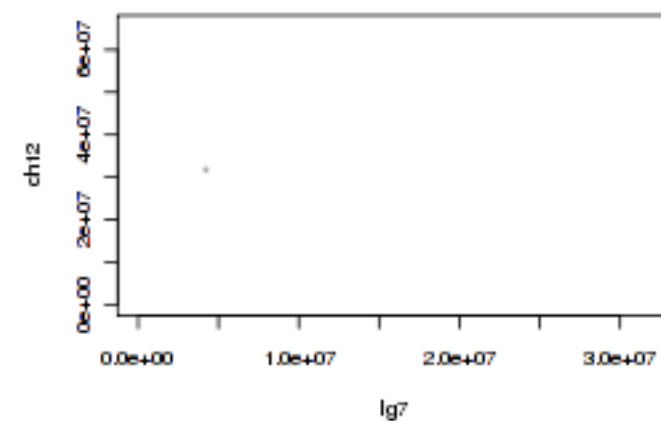

Tobacco Ig8 and tomato ch01

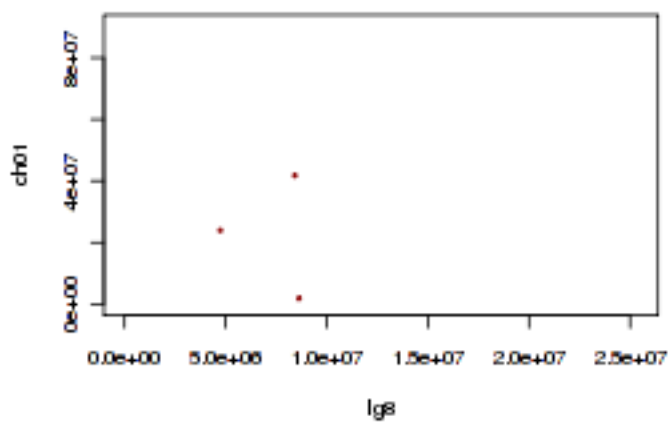

Tobacco Ig8 and tomato ch02

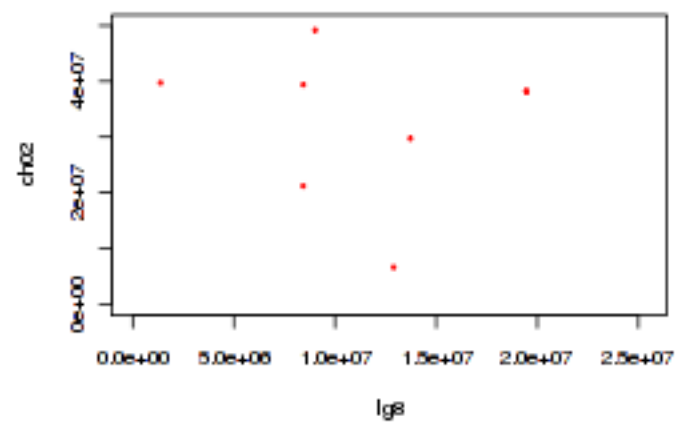

Tobacco Ig8 and tomato ch03

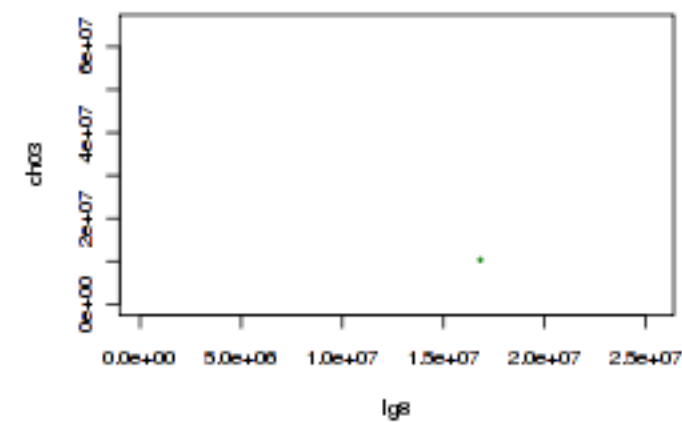

Tobacco Ig8 and tomato ch04

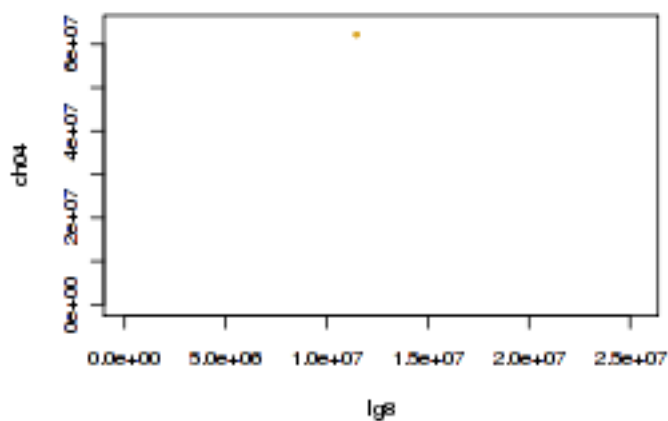

Tobacco Ig8 and tomato ch05

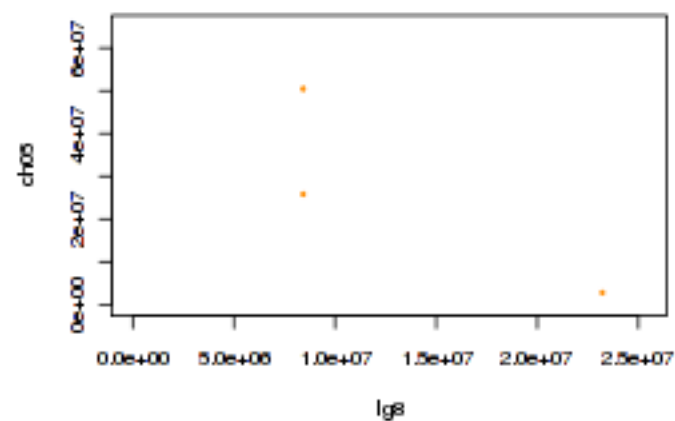

Tobacco Ig8 and tomato ch06

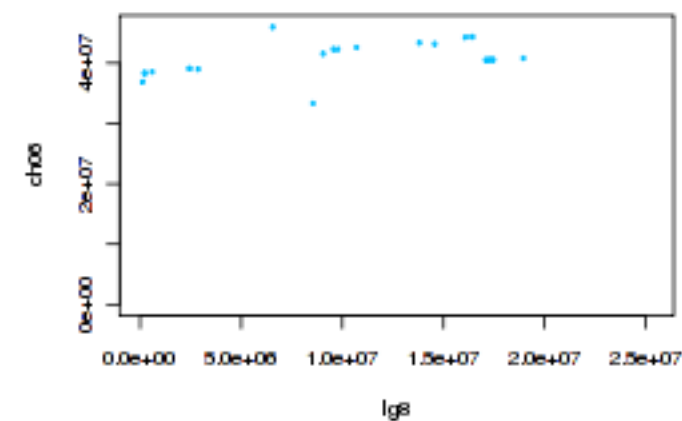

Tobacco Ig8 and tomato ch07

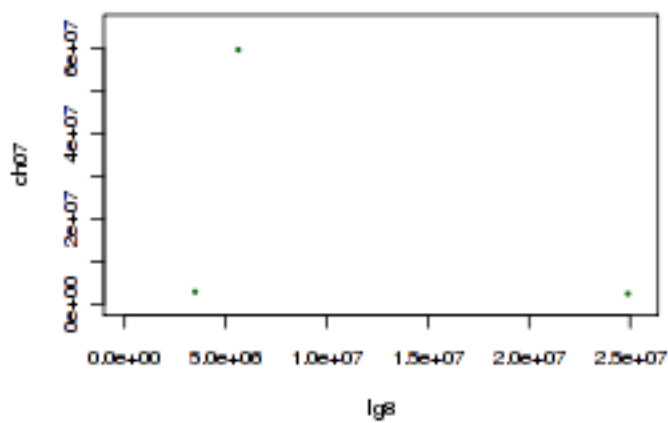

Tobacco Ig8 and tomato ch08

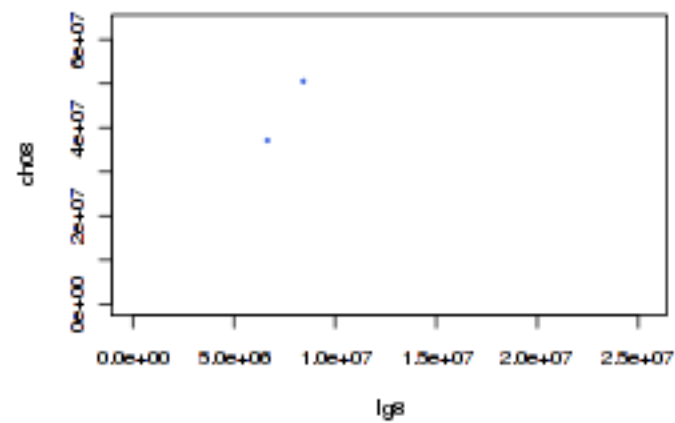

Tobacco Ig8 and tomato ch09

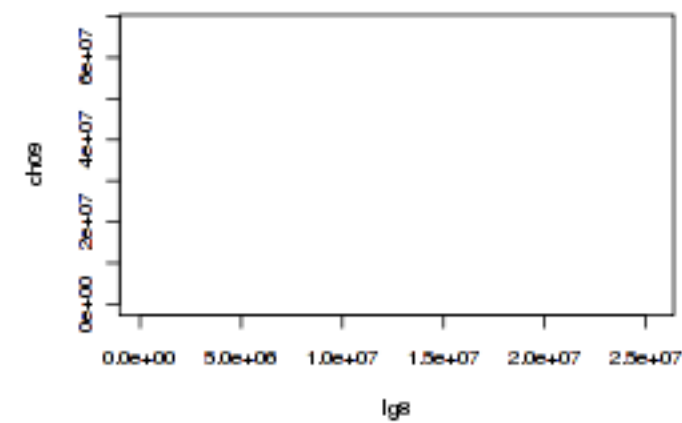

Tobacco Ig8 and tomato ch10

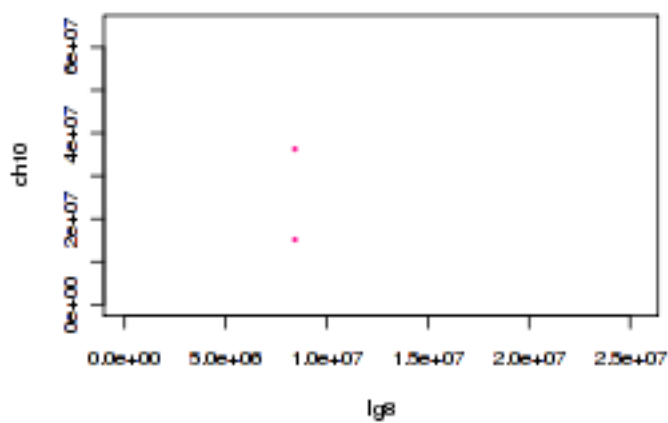

Tobacco Ig8 and tomato ch11

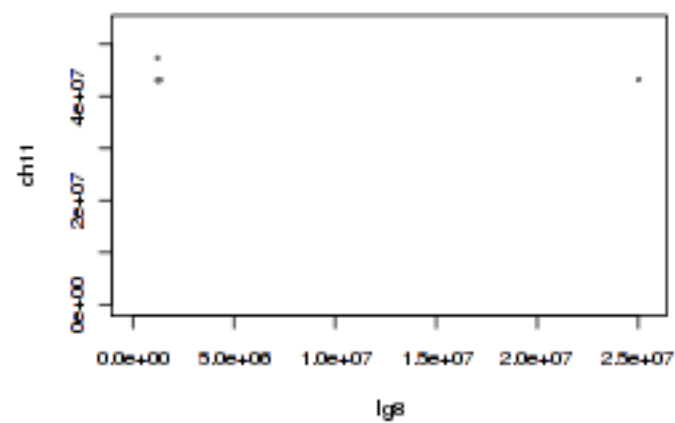

Tobacco Ig8 and tomato ch12

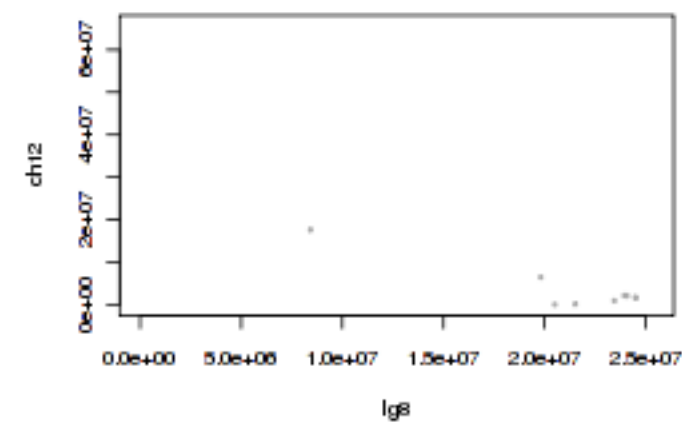



Tobacco Ig9 and tomato ch01

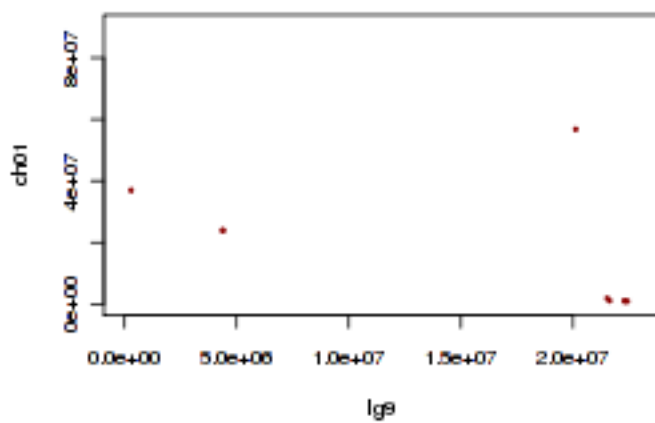

Tobacco Ig9 and tomato ch02

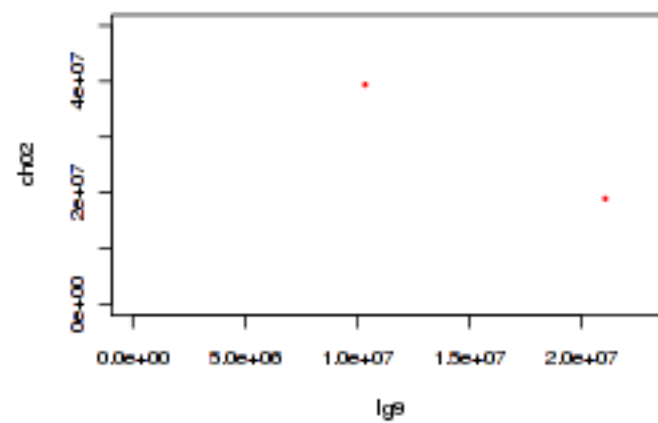

Tobacco Ig9 and tomato ch03

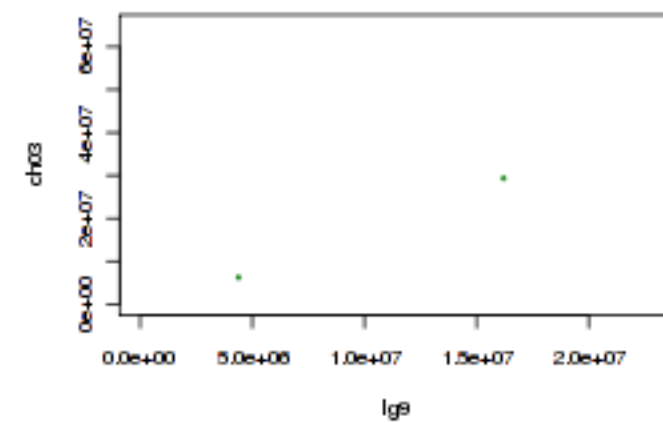

Tobacco Ig9 and tomato ch04

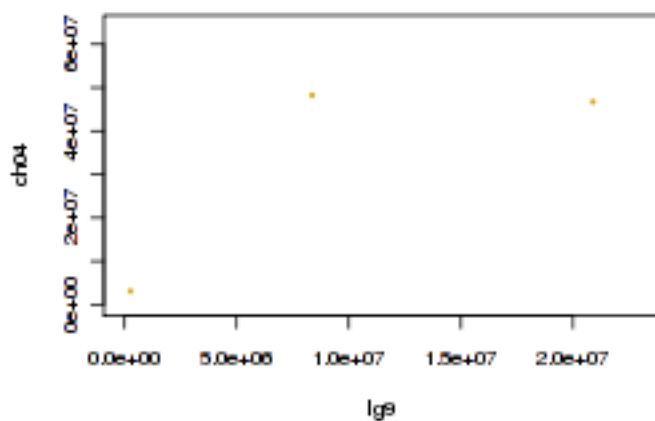

Tobacco Ig9 and tomato ch05

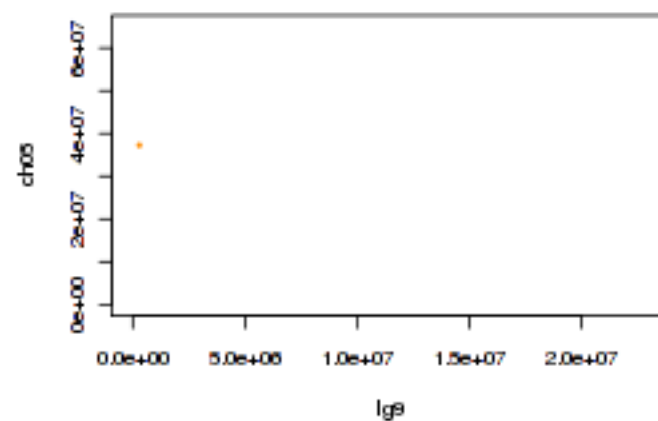

Tobacco Ig9 and tomato ch06

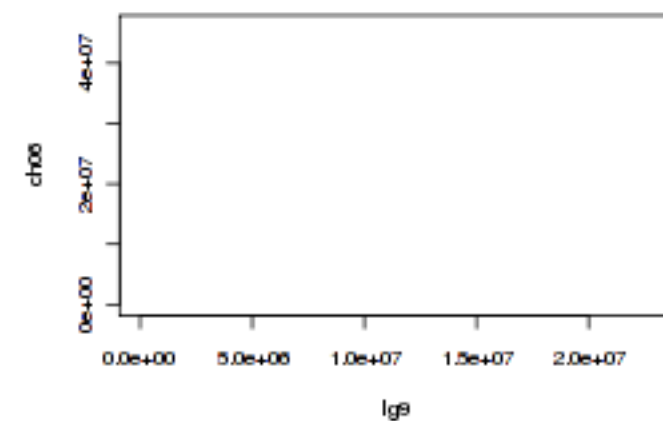

Tobacco Ig9 and tomato ch07

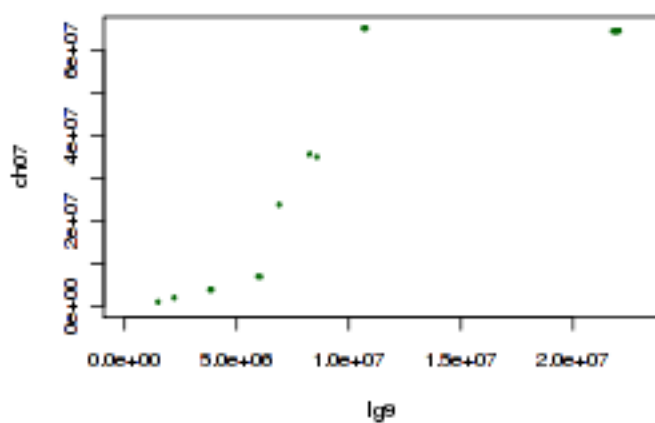

Tobacco Ig9 and tomato ch08

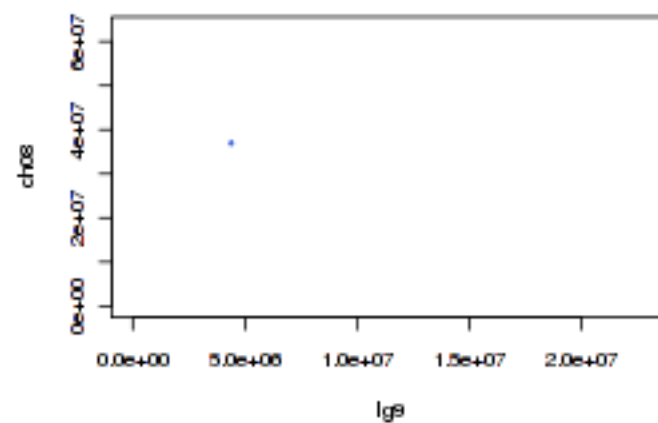

Tobacco Ig9 and tomato ch09

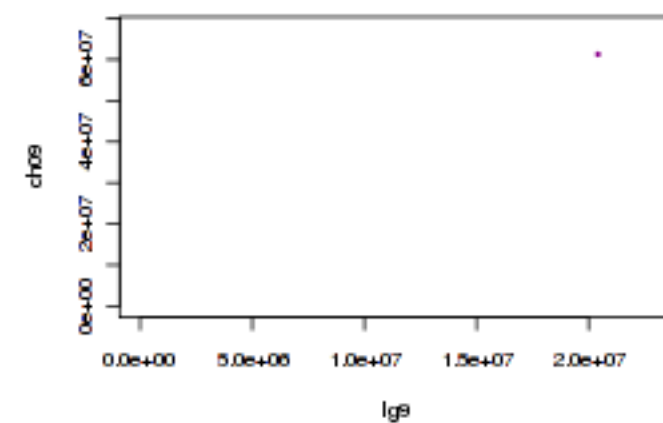

Tobacco Ig9 and tomato ch10

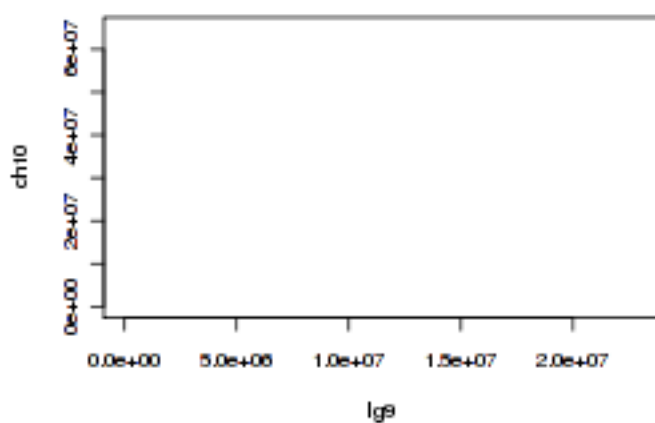

Tobacco Ig9 and tomato ch11

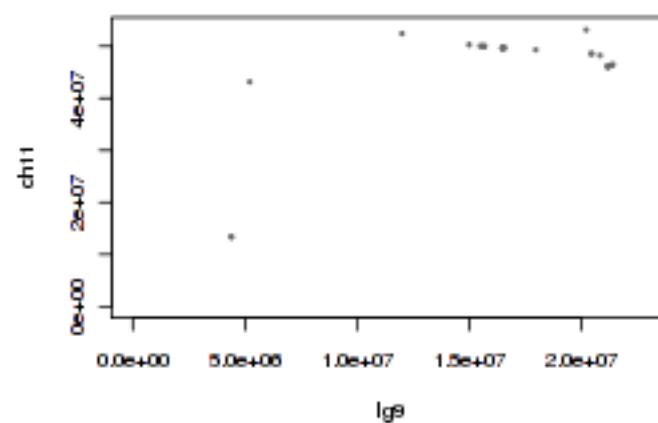

Tobacco Ig9 and tomato ch12

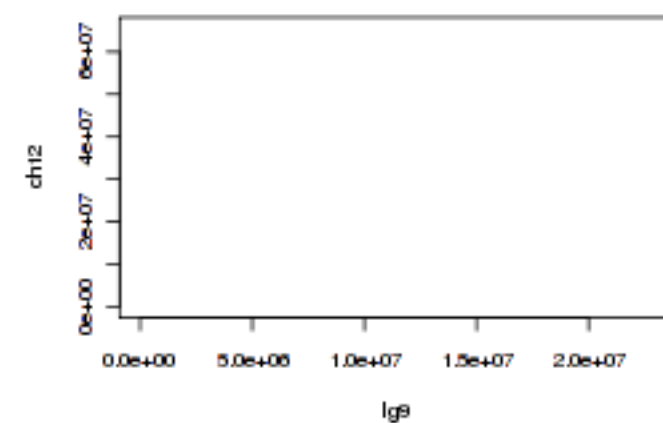

Tobacco lg10 and tomato ch01

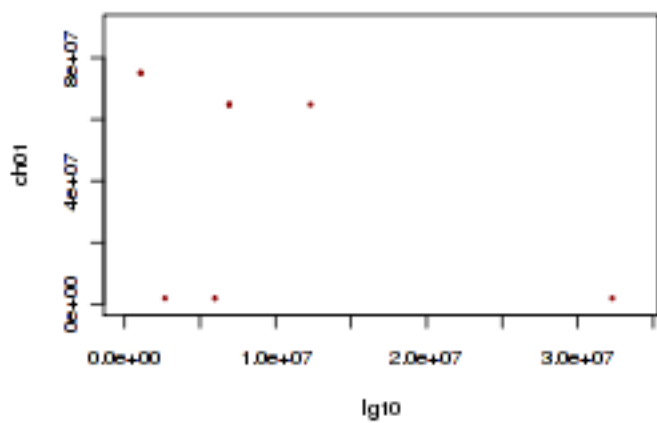

Tobacco lg10 and tomato ch02

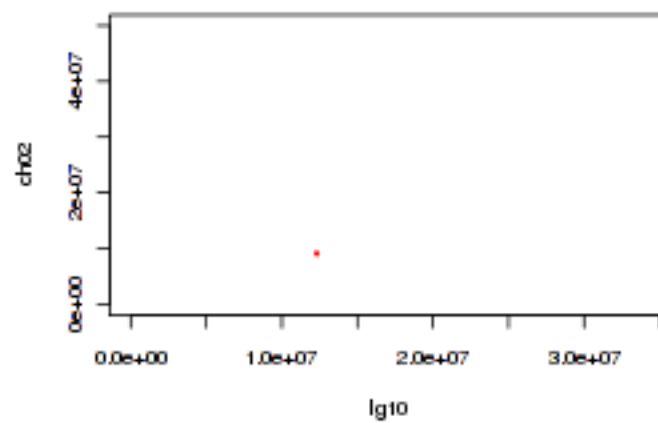

Tobacco lg10 and tomato ch03

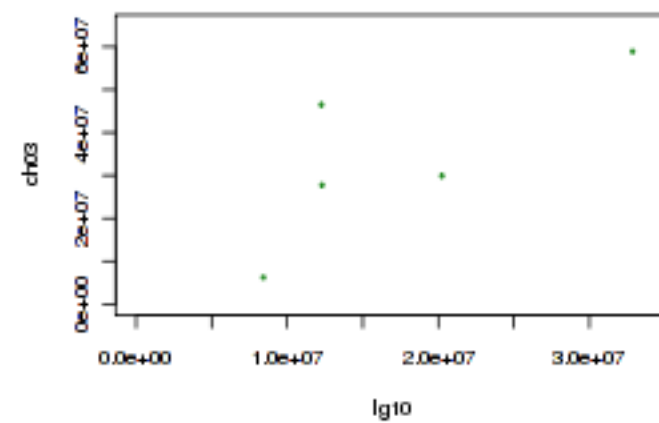

Tobacco lg10 and tomato ch04

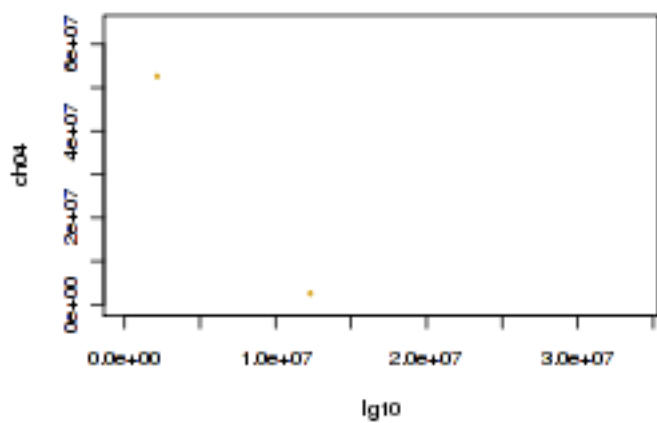

Tobacco lg10 and tomato ch05

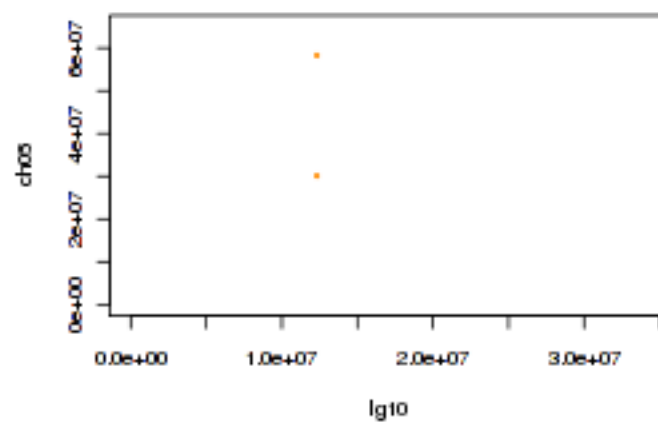

Tobacco lg10 and tomato ch06

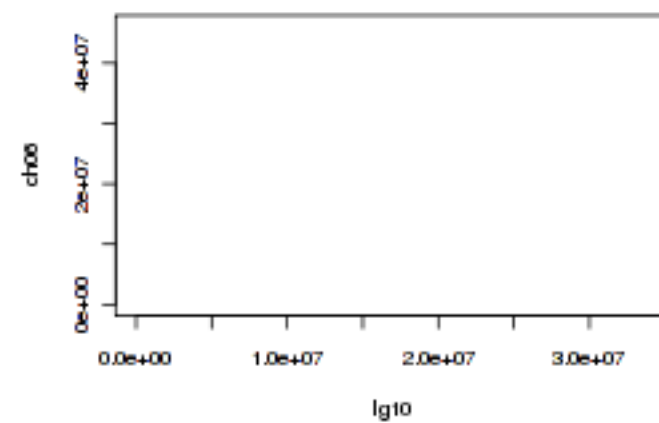

Tobacco lg10 and tomato ch07

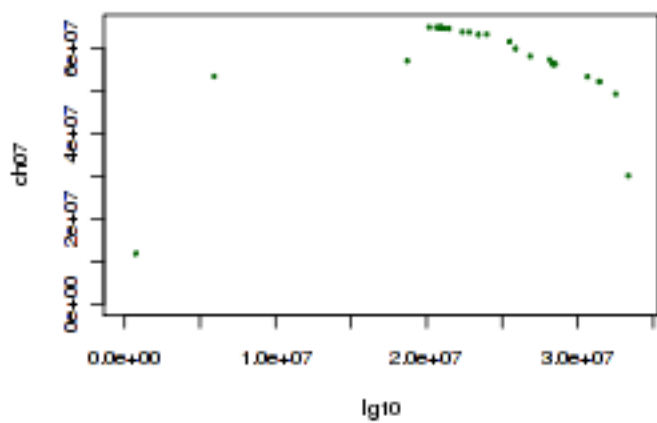

Tobacco lg10 and tomato ch08

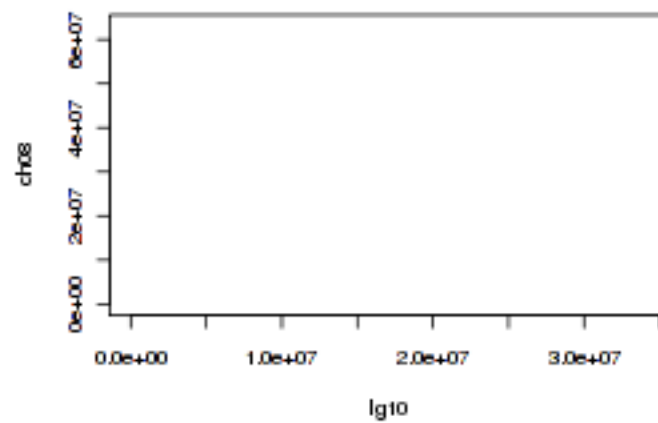

Tobacco lg10 and tomato ch09

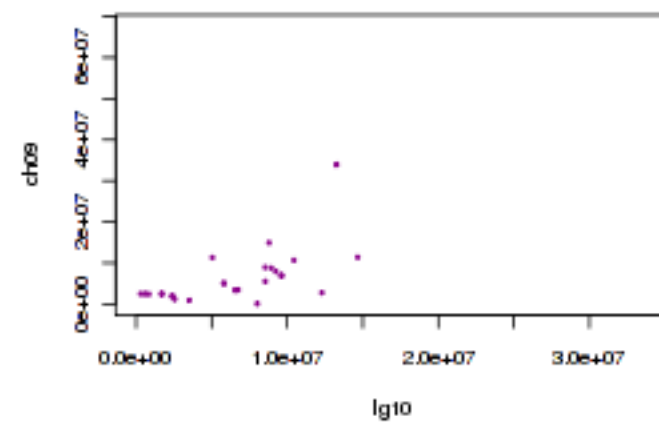

Tobacco lg10 and tomato ch10

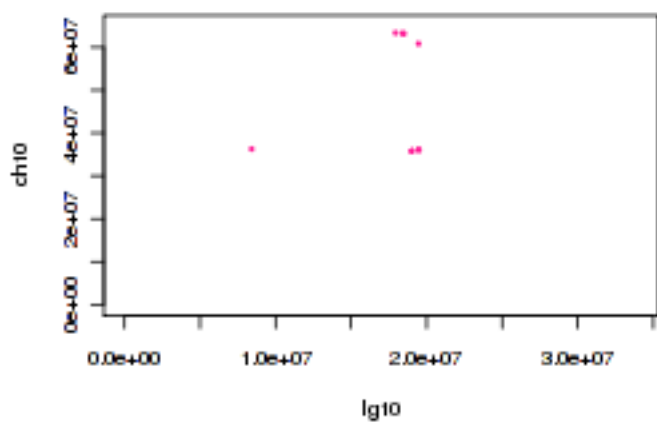

Tobacco lg10 and tomato ch11

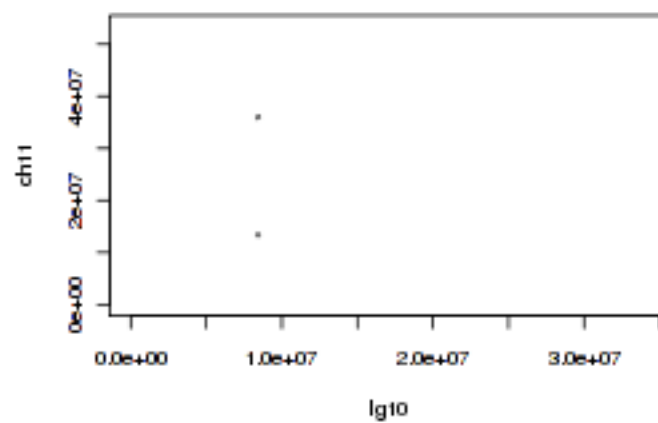

Tobacco lg10 and tomato ch12

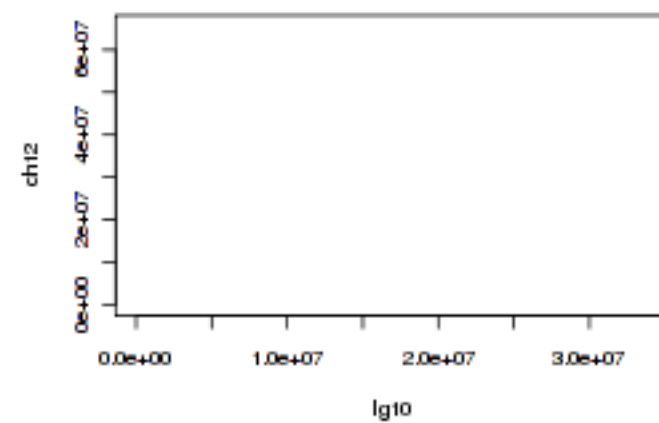

Tobacco lg11 and tomato ch01

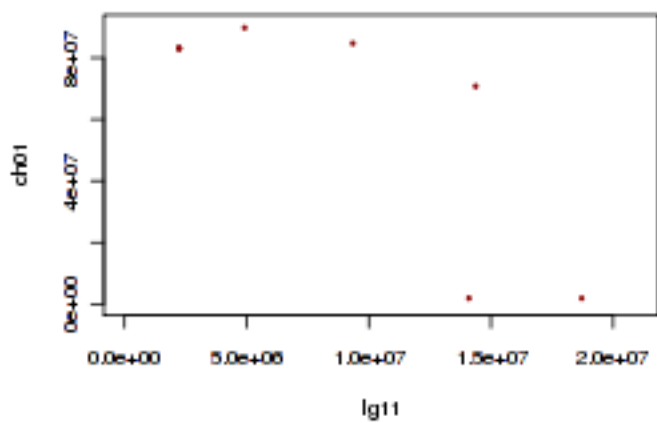

Tobacco lg11 and tomato ch02

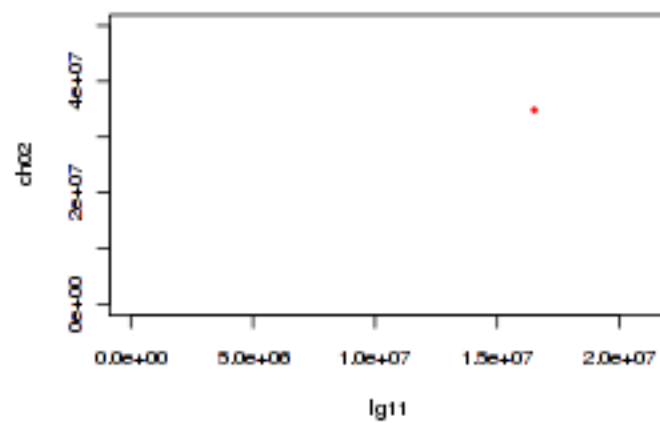

Tobacco lg11 and tomato ch03

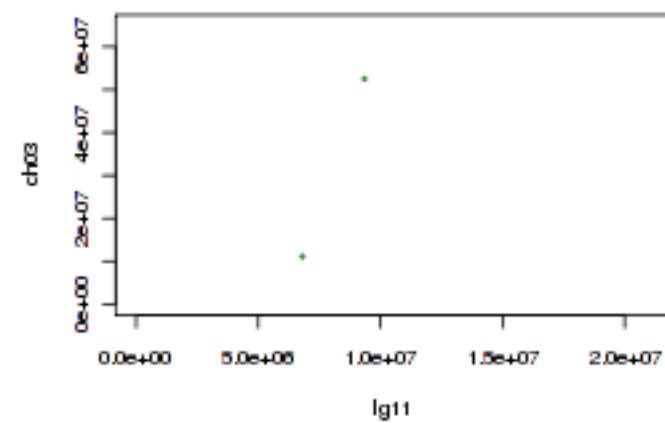

Tobacco lg11 and tomato ch04

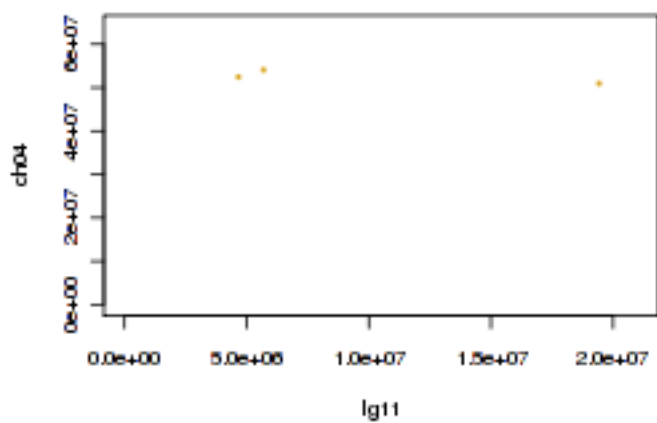

Tobacco lg11 and tomato ch05

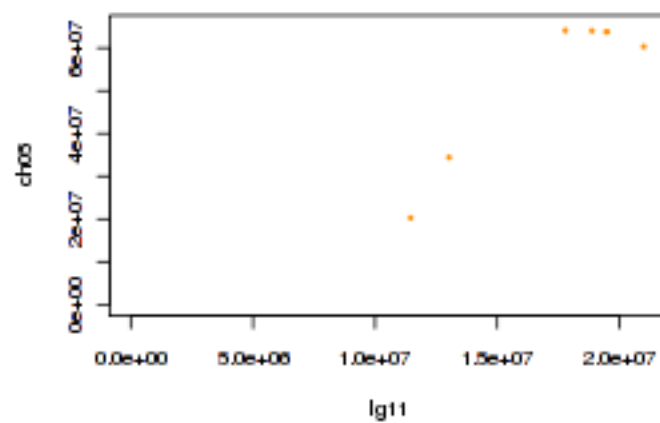

Tobacco lg11 and tomato ch06

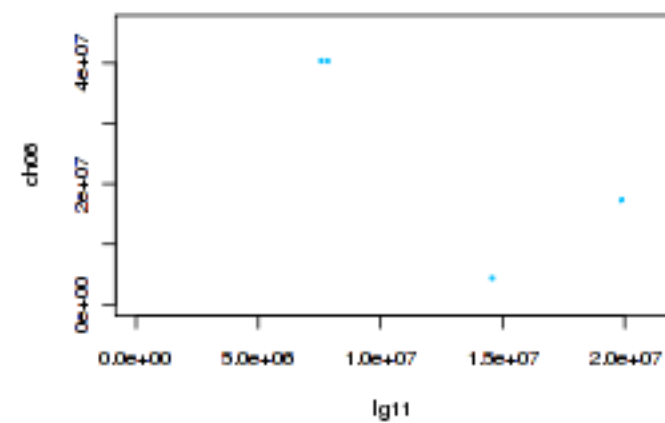

Tobacco lg11 and tomato ch07

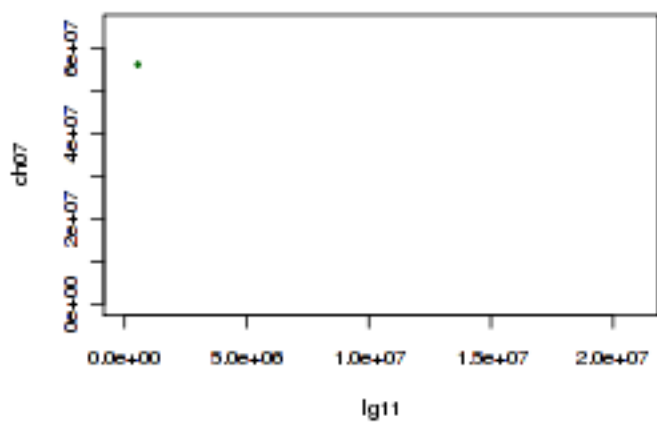

Tobacco lg11 and tomato ch08

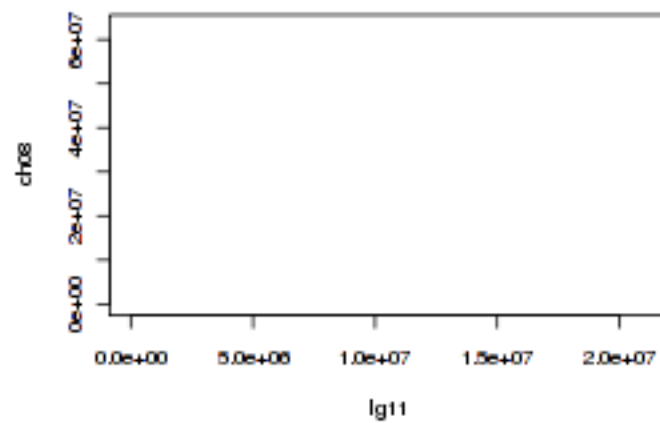

Tobacco lg11 and tomato ch09

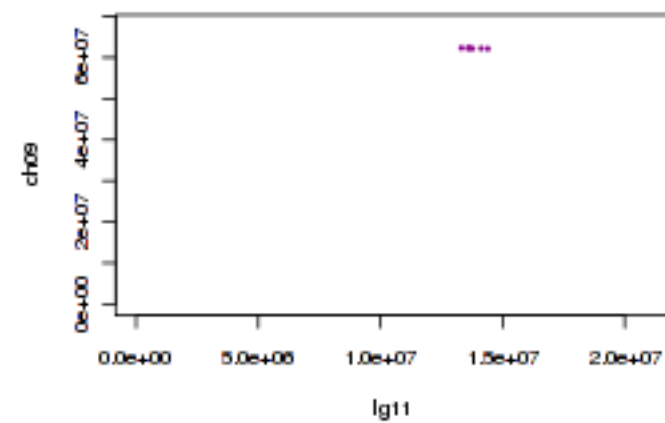

Tobacco lg11 and tomato ch10

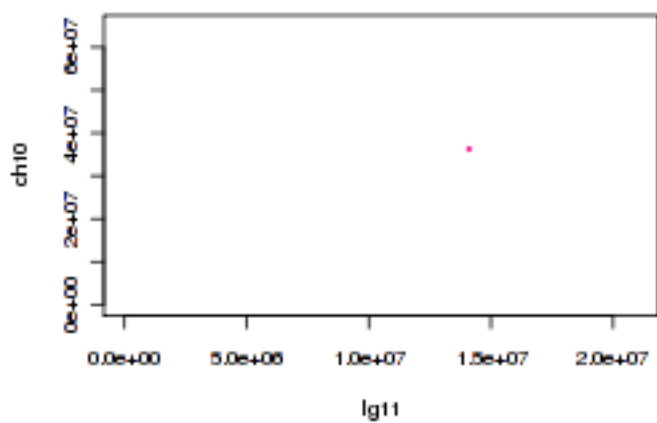

Tobacco lg11 and tomato ch11

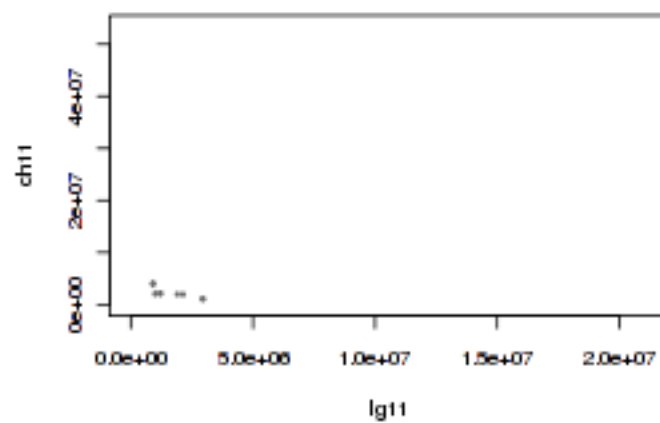

Tobacco lg11 and tomato ch12

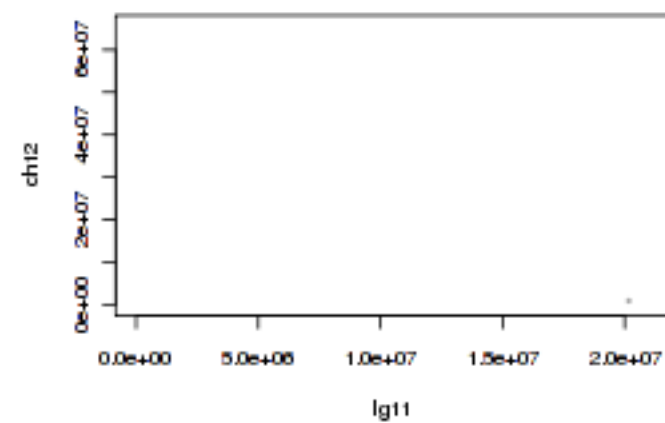

Tobacco lg12 and tomato ch01

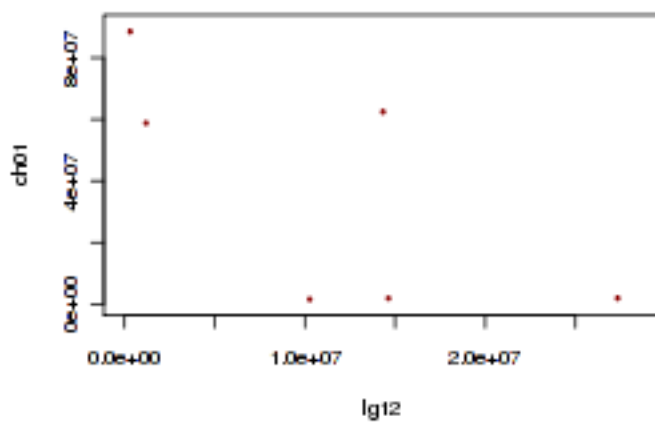

Tobacco lg12 and tomato ch02

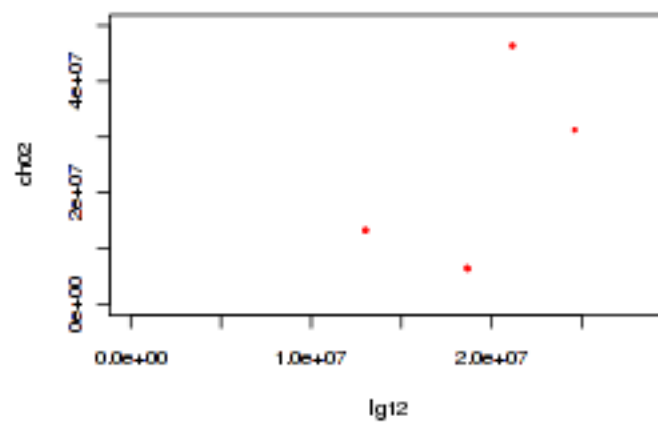

Tobacco lg12 and tomato ch03

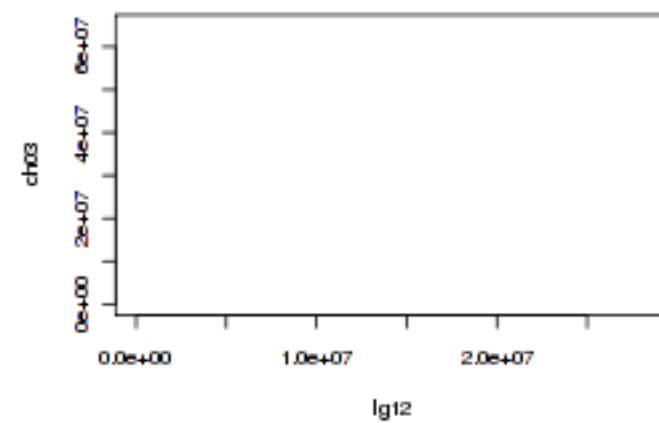

Tobacco lg12 and tomato ch04

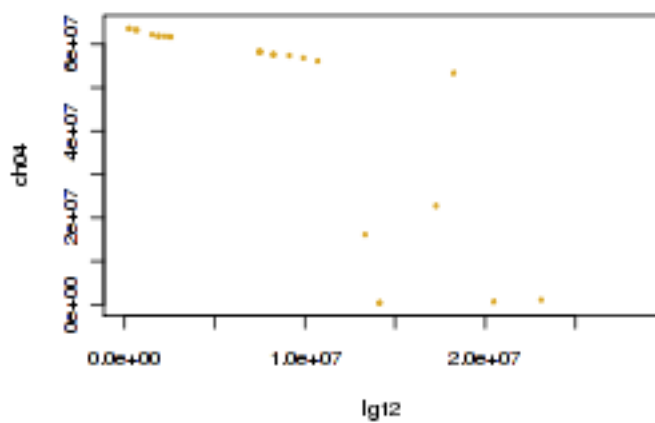

Tobacco lg12 and tomato ch05

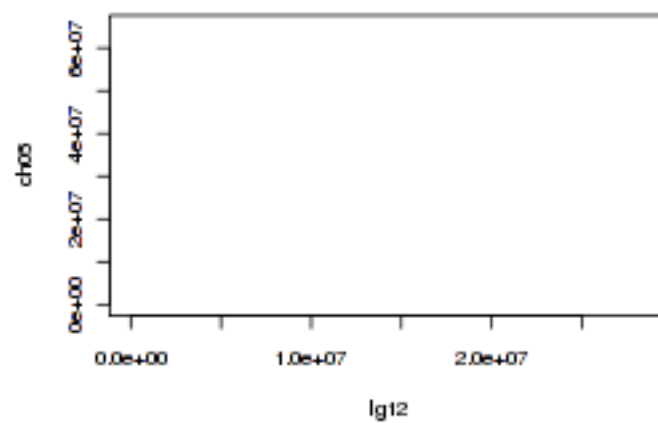

Tobacco lg12 and tomato ch06

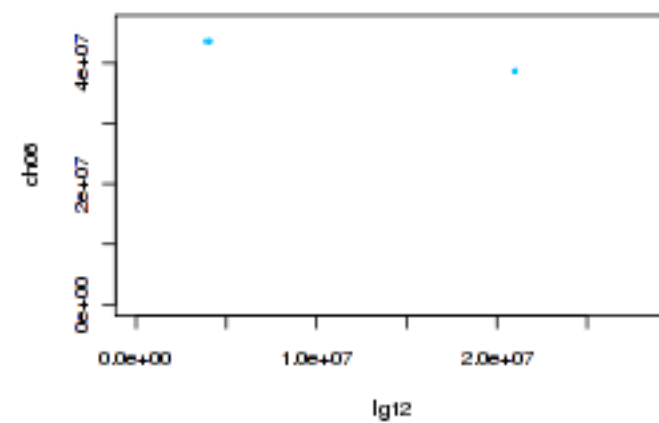

Tobacco lg12 and tomato ch07

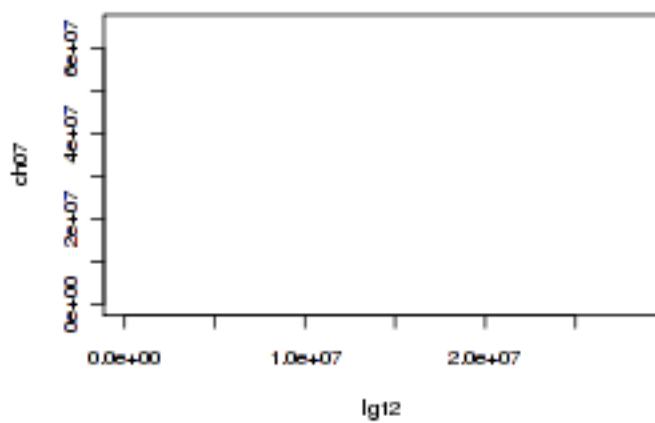

Tobacco lg12 and tomato ch08

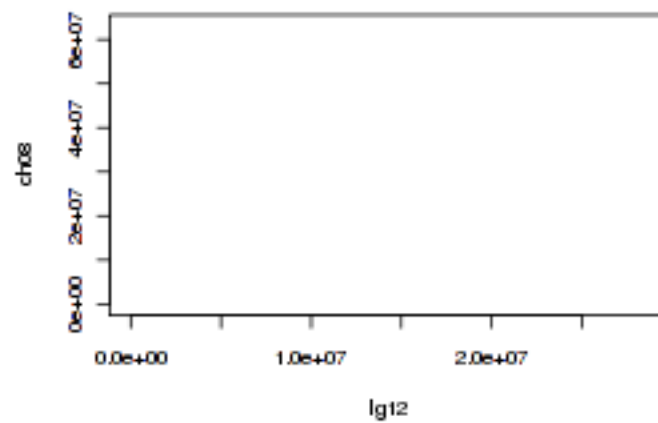

Tobacco lg12 and tomato ch09

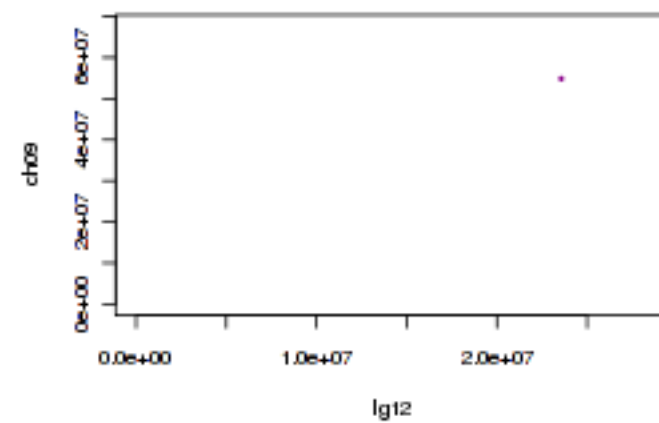

Tobacco lg12 and tomato ch10

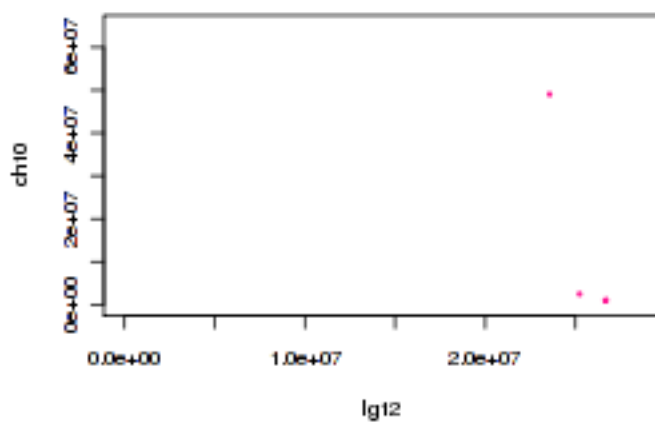

Tobacco lg12 and tomato ch11

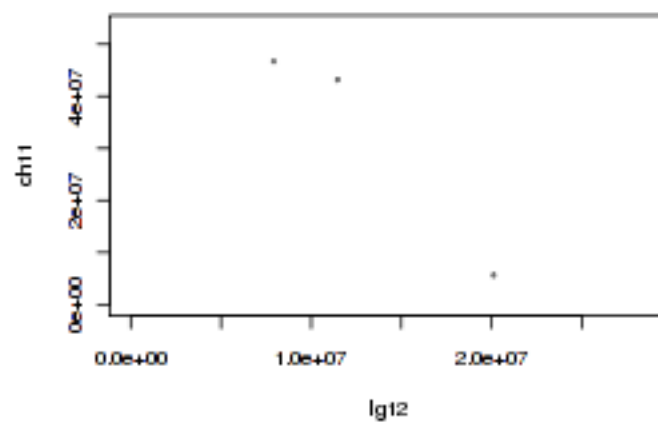

Tobacco lg12 and tomato ch12

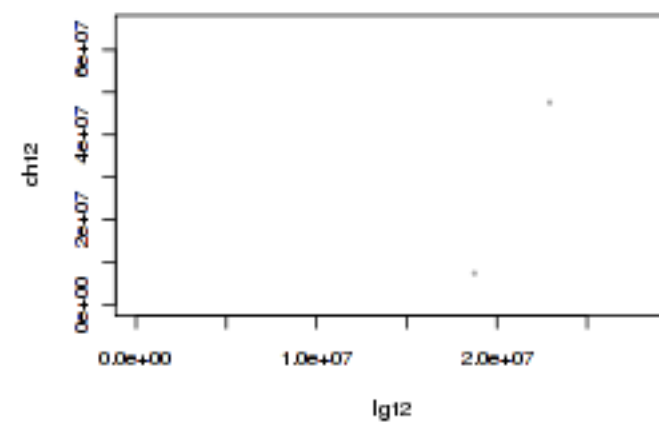

Tobacco lg13 and tomato ch01

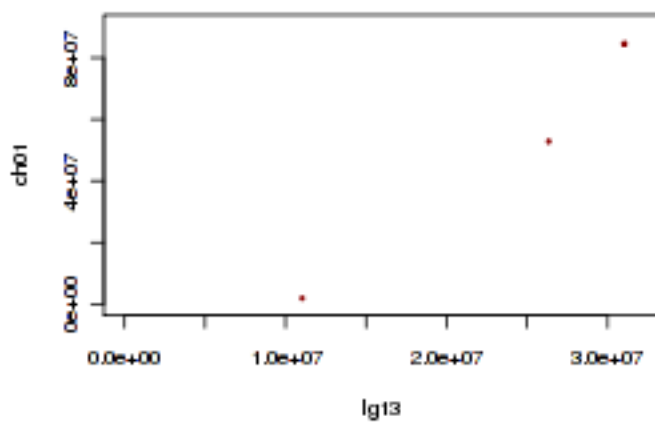

Tobacco lg13 and tomato ch02

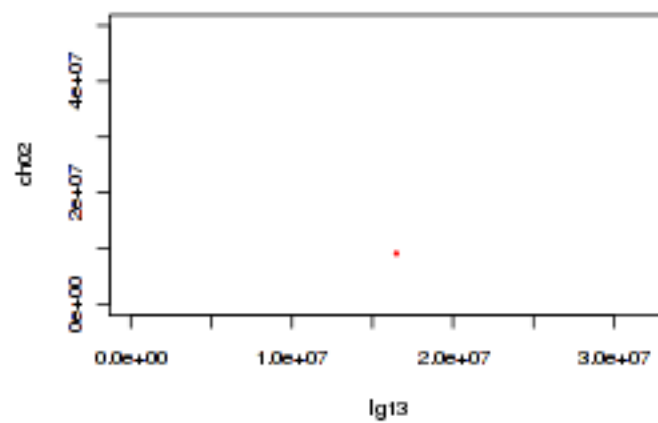

Tobacco lg13 and tomato ch03

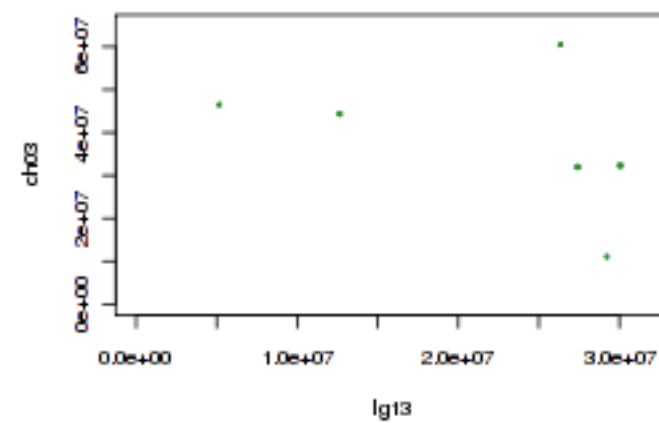

Tobacco lg13 and tomato ch04

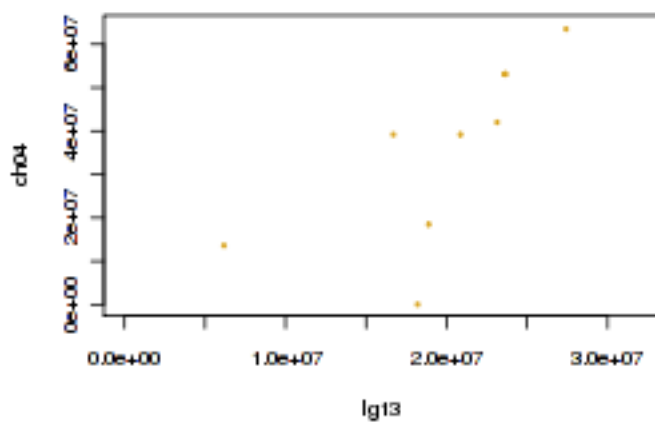

Tobacco lg13 and tomato ch05

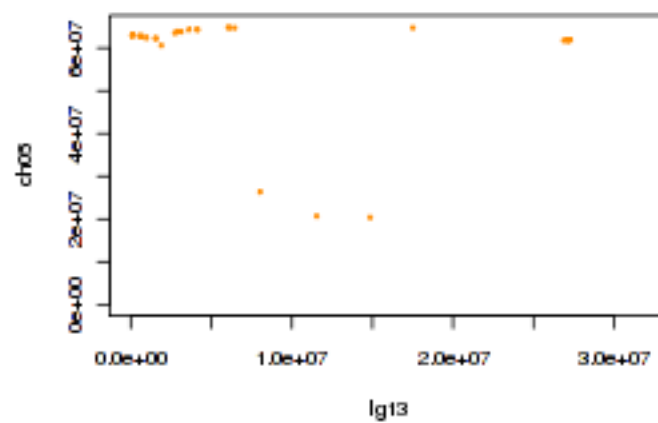

Tobacco lg13 and tomato ch06

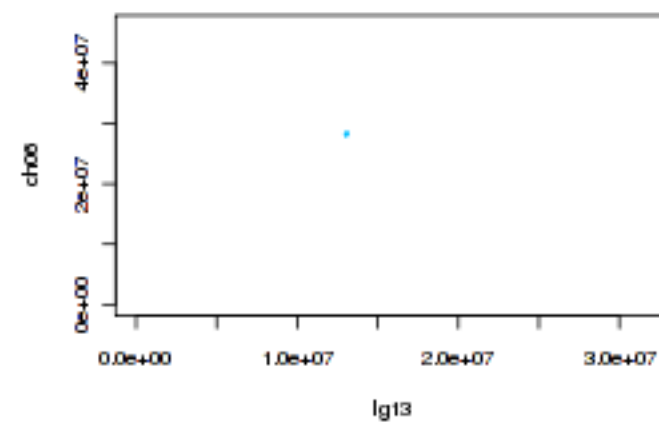

Tobacco lg13 and tomato ch07

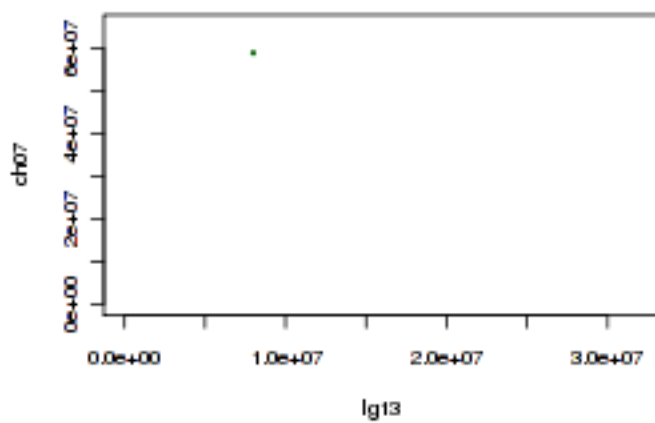

Tobacco lg13 and tomato ch08

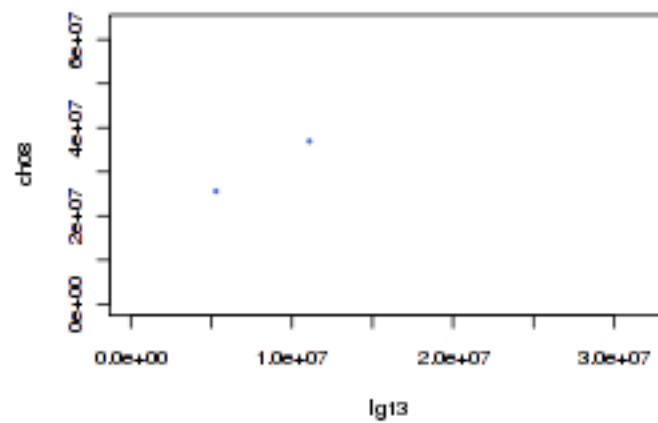

Tobacco lg13 and tomato ch09

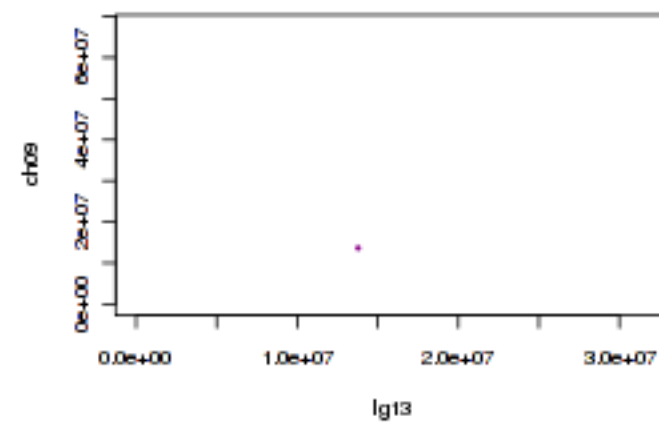

Tobacco lg13 and tomato ch10

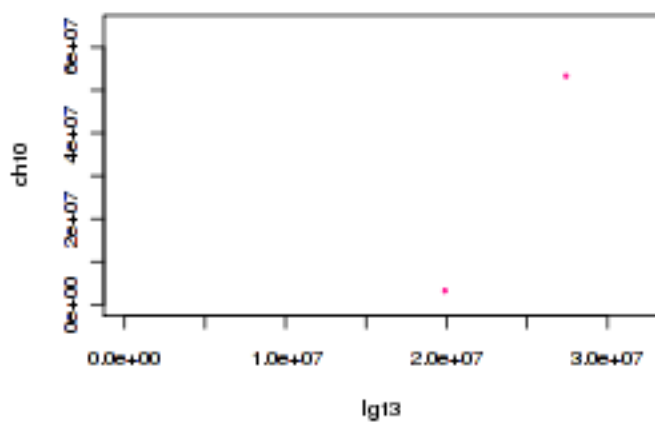

Tobacco lg13 and tomato ch11

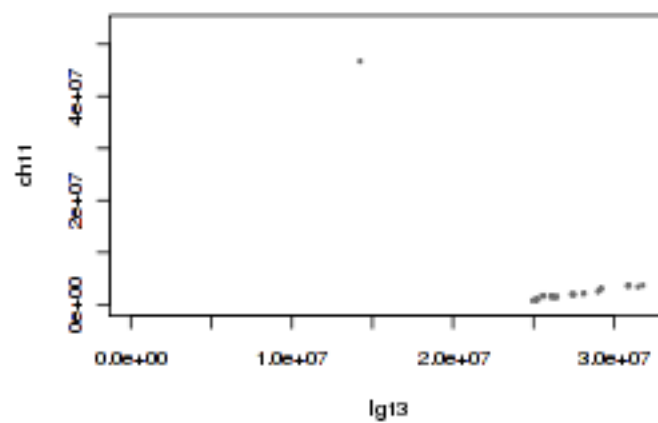

Tobacco lg13 and tomato ch12

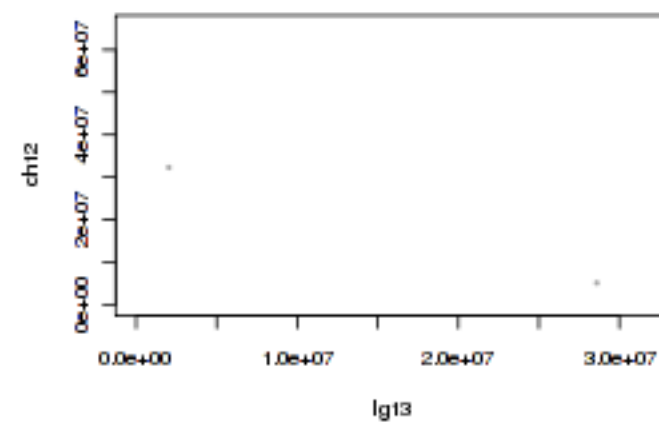

Tobacco lg14 and tomato ch01

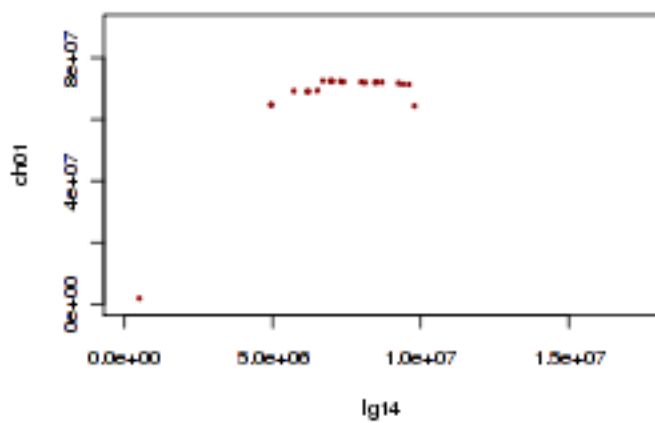

Tobacco lg14 and tomato ch02

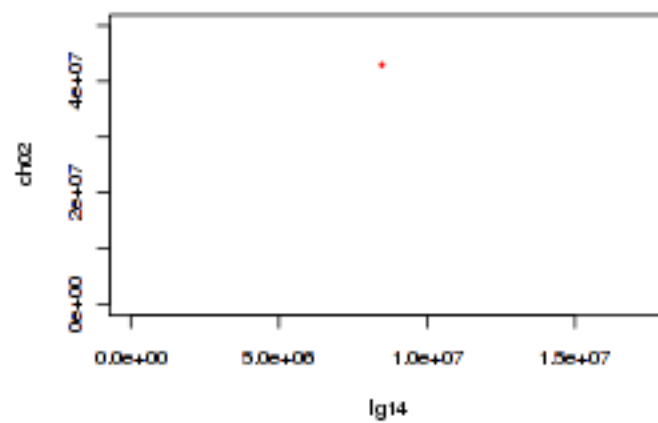

Tobacco lg14 and tomato ch03

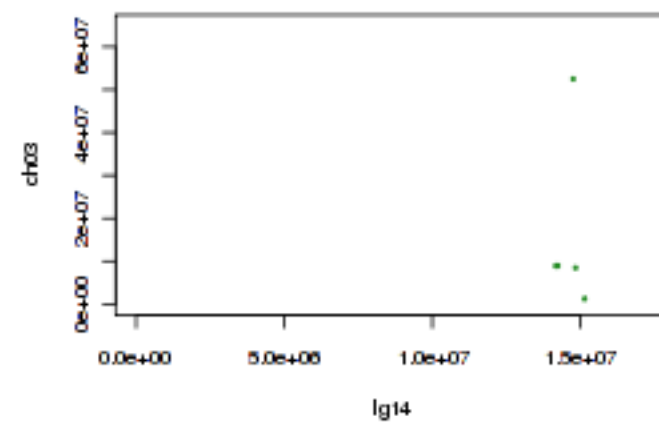

Tobacco lg14 and tomato ch04

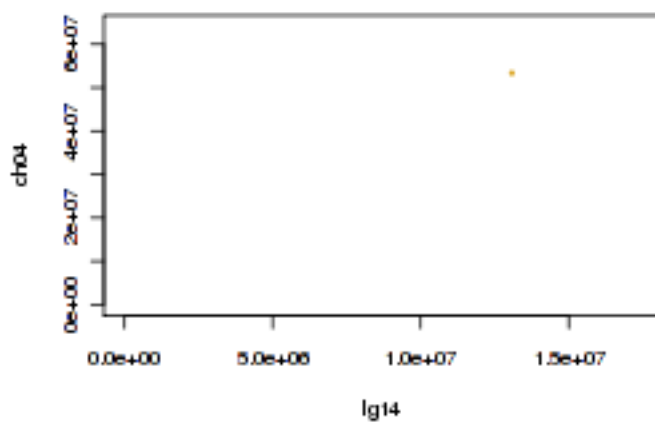

Tobacco lg14 and tomato ch05

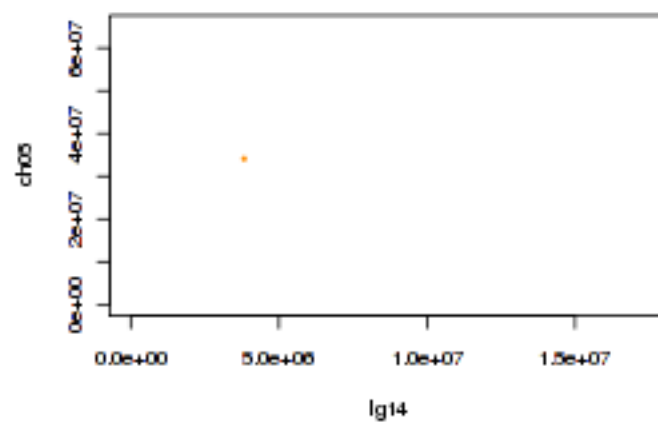

Tobacco lg14 and tomato ch06

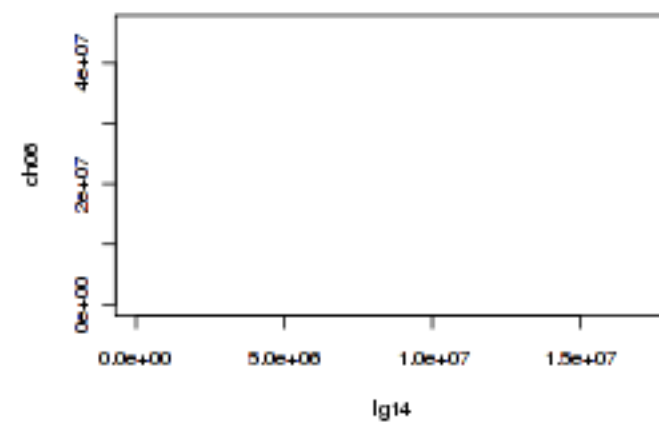

Tobacco lg14 and tomato ch07

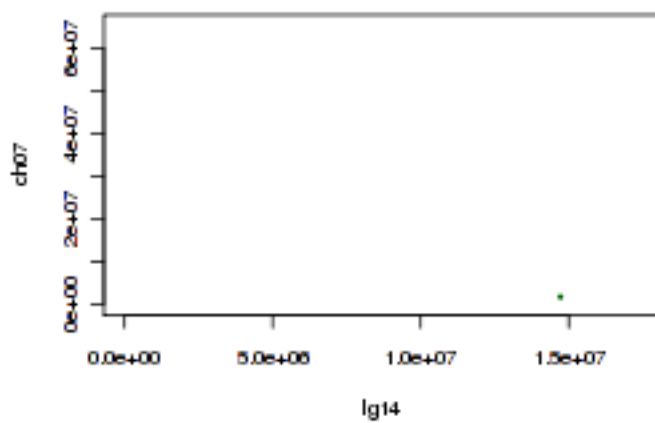

Tobacco lg14 and tomato ch08

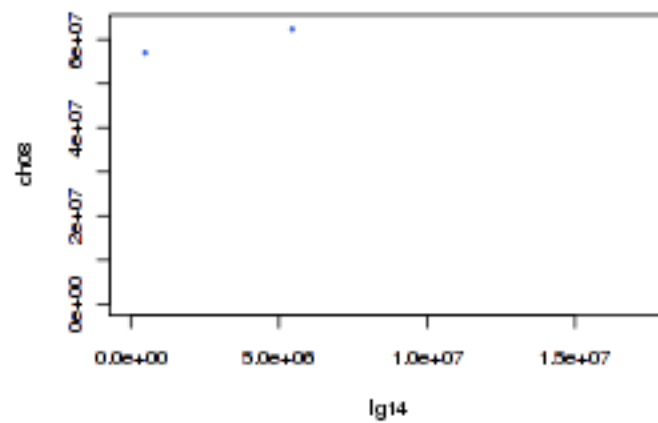

Tobacco lg14 and tomato ch09

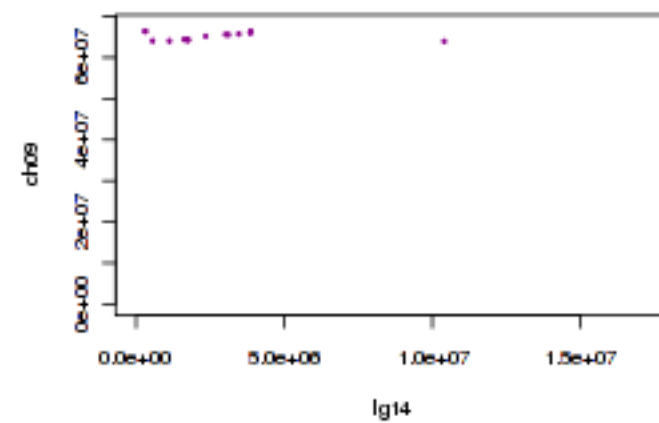

Tobacco lg14 and tomato ch10

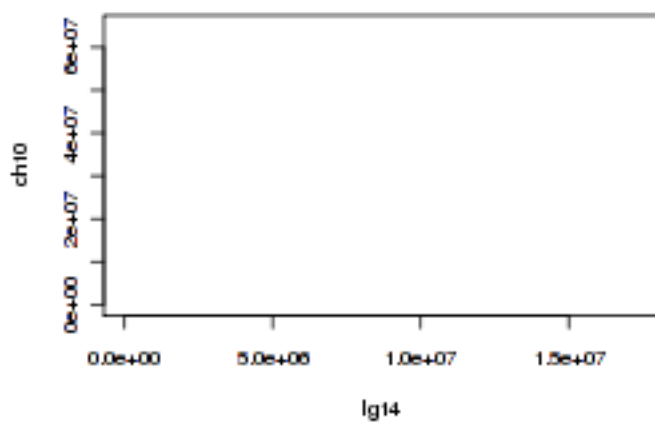

Tobacco lg14 and tomato ch11

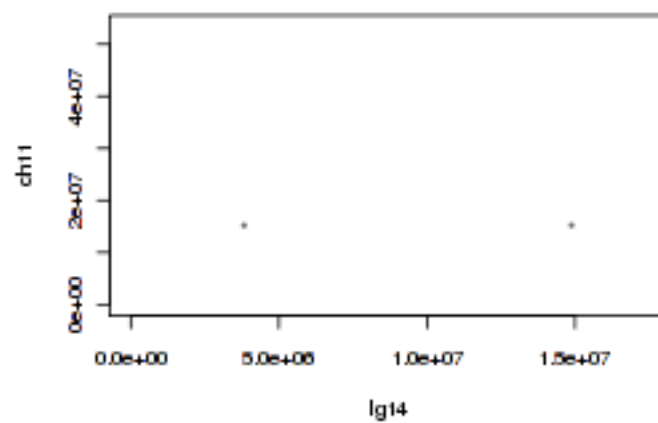

Tobacco lg14 and tomato ch12

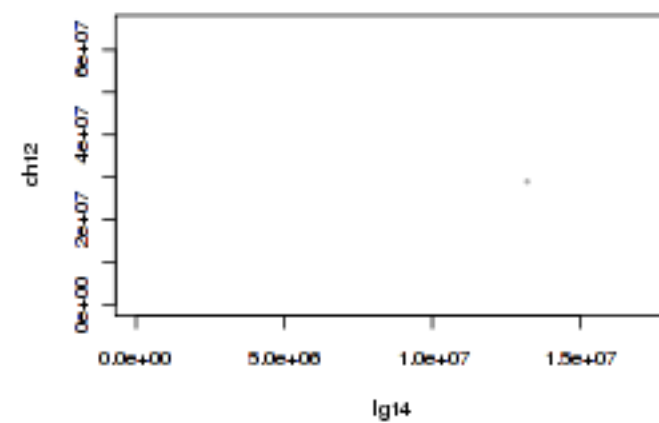

Tobacco lg15 and tomato ch01

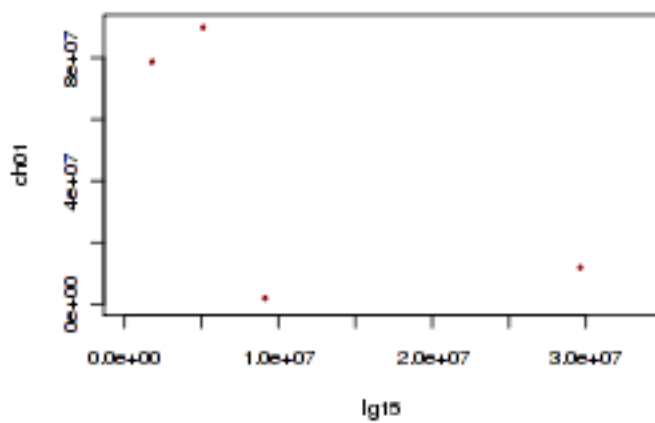

Tobacco lg15 and tomato ch02

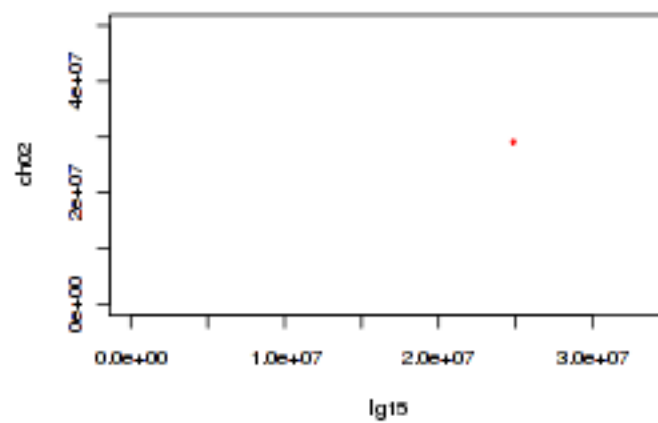

Tobacco lg15 and tomato ch03

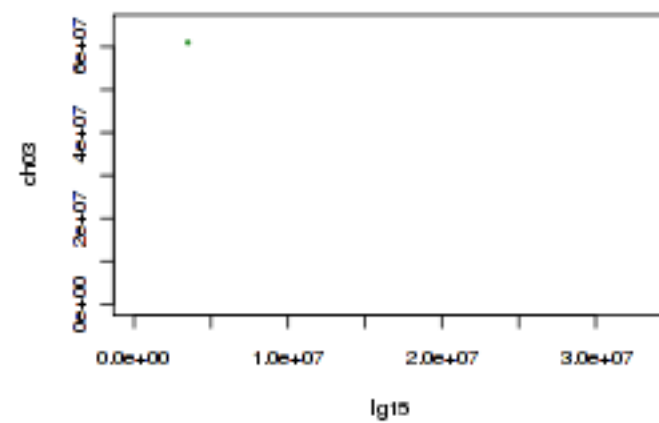

Tobacco lg15 and tomato ch04

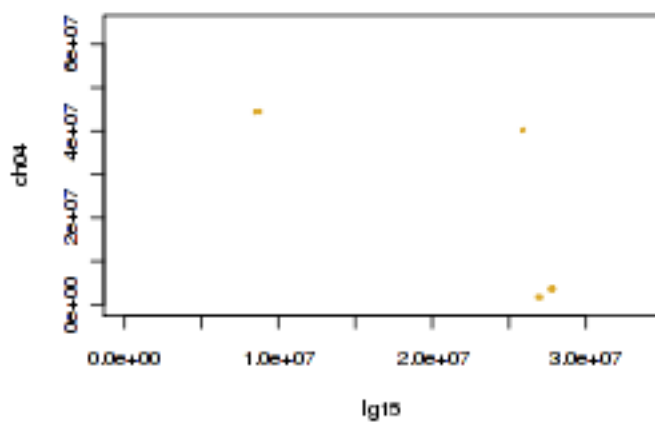

Tobacco lg15 and tomato ch05

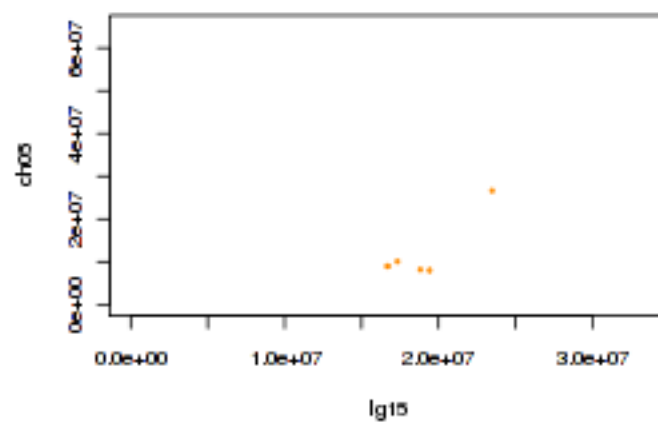

Tobacco lg15 and tomato ch06

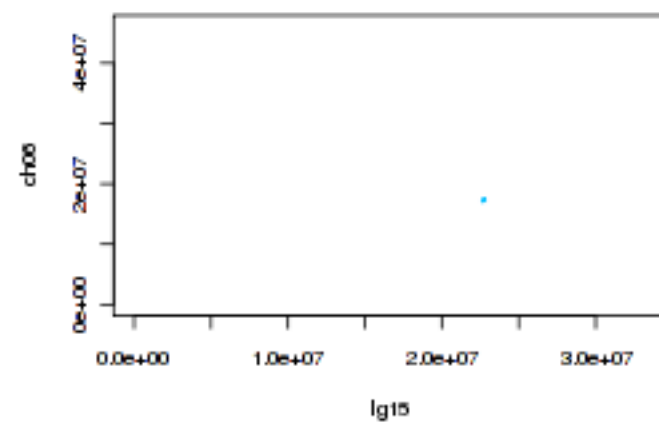

Tobacco lg15 and tomato ch07

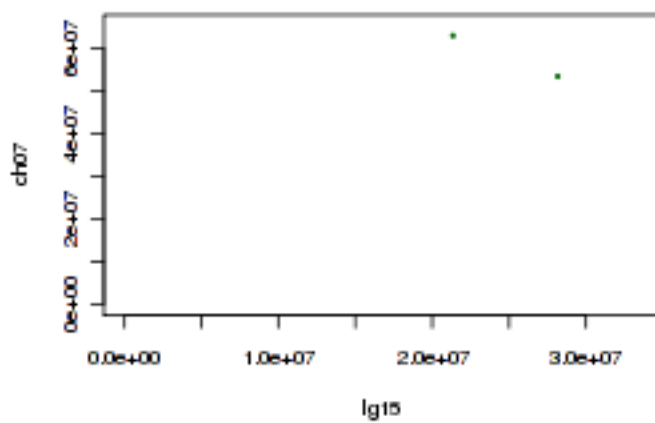

Tobacco lg15 and tomato ch08

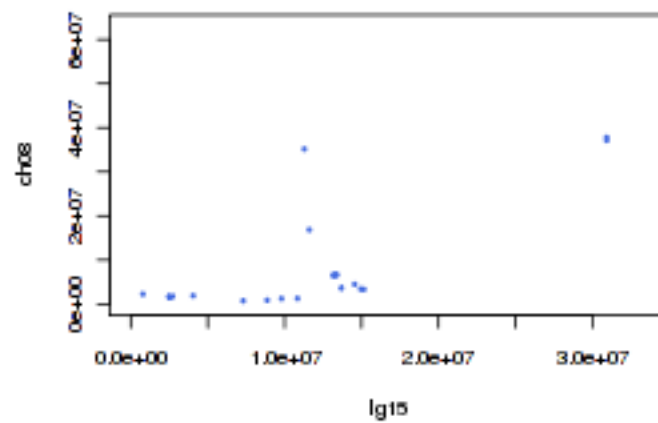

Tobacco lg15 and tomato ch09

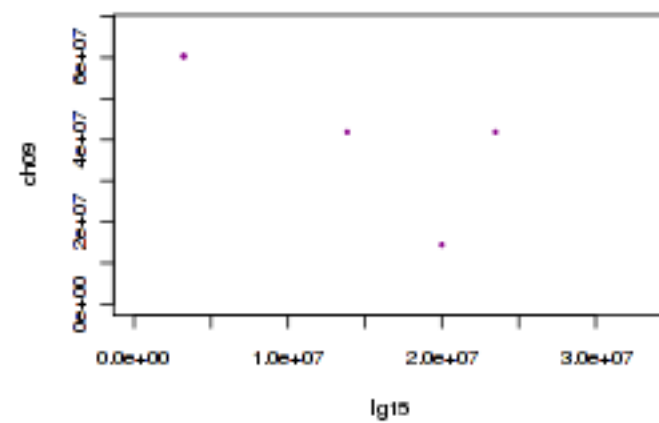

Tobacco lg15 and tomato ch10

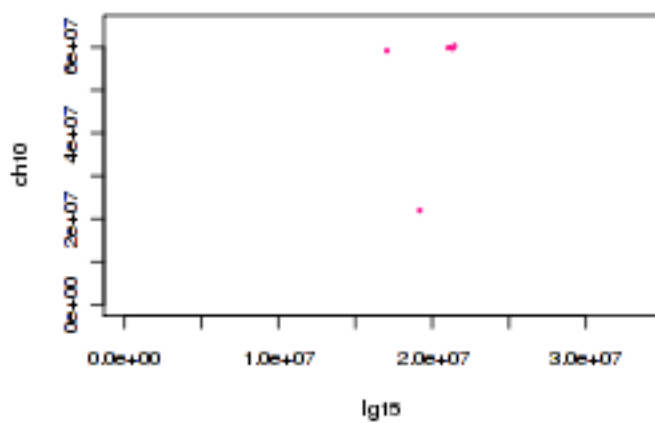

Tobacco lg15 and tomato ch11

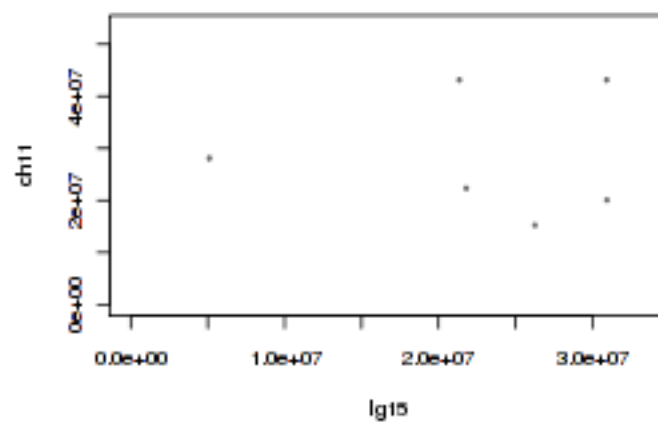

Tobacco lg15 and tomato ch12

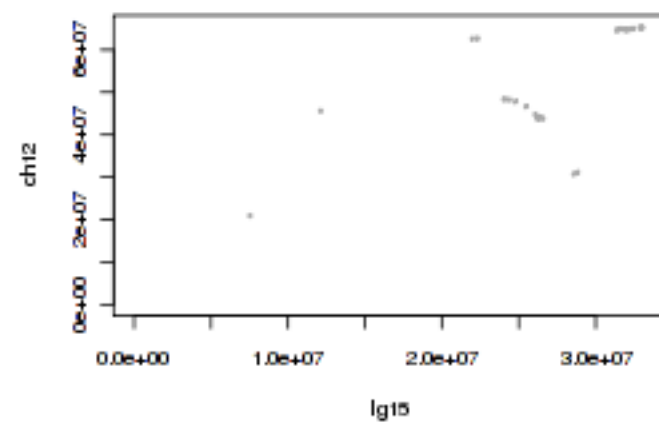

Tobacco lg16 and tomato ch01

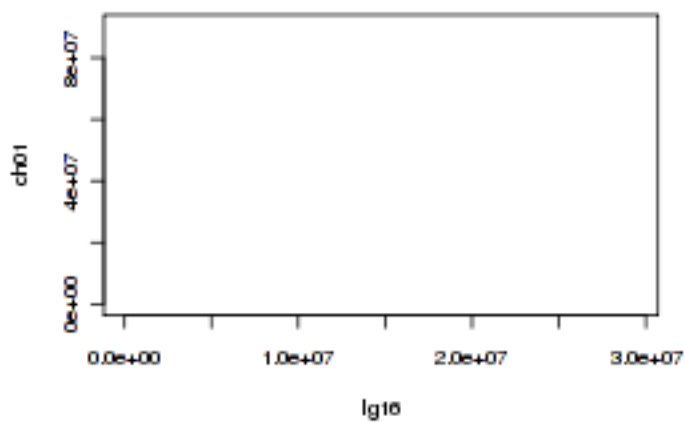

Tobacco lg16 and tomato ch02

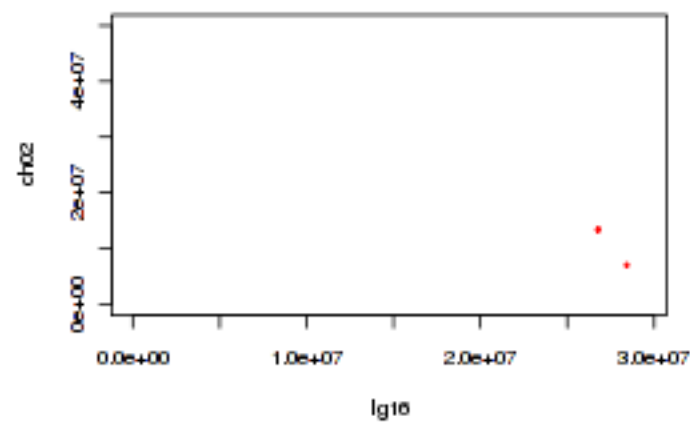

Tobacco lg16 and tomato ch03

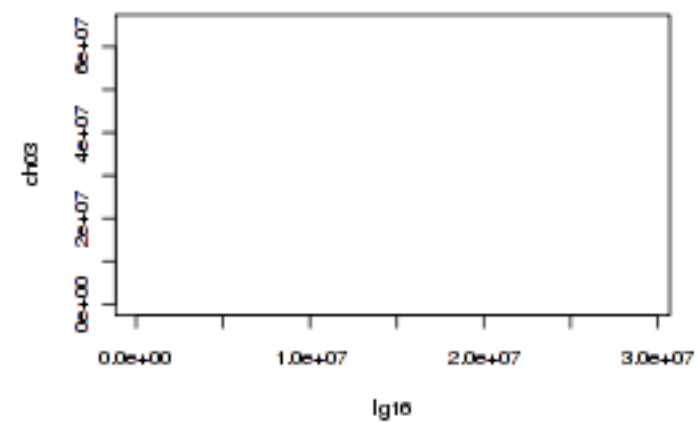

Tobacco lg16 and tomato ch04

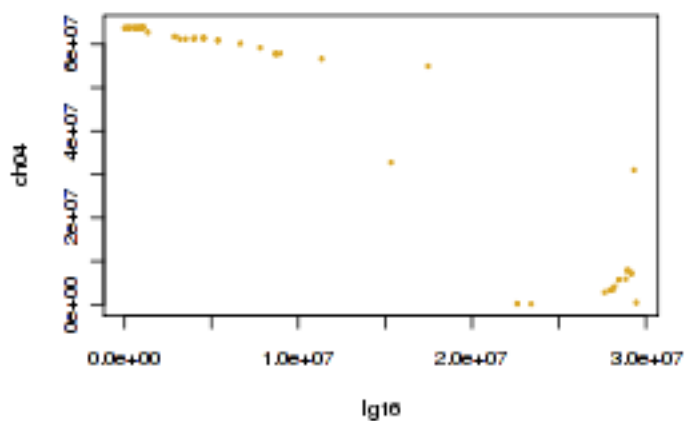

Tobacco lg16 and tomato ch05

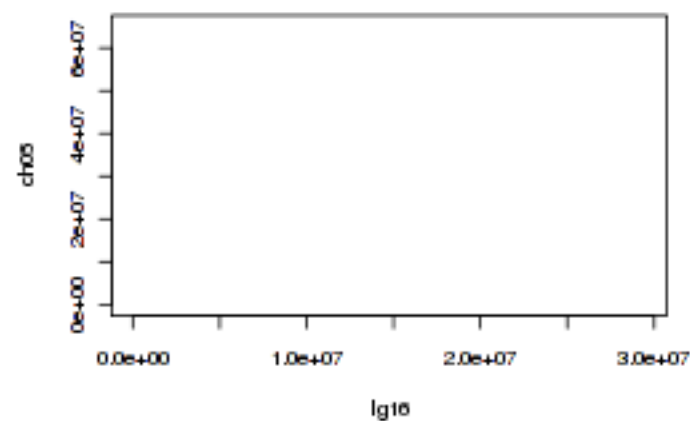

Tobacco lg16 and tomato ch06

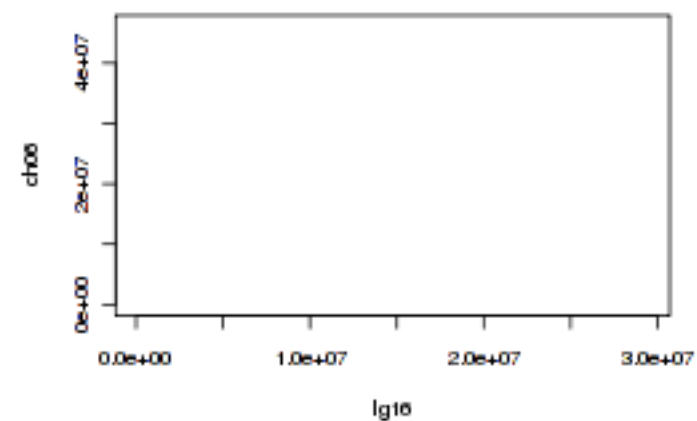

Tobacco lg16 and tomato ch07

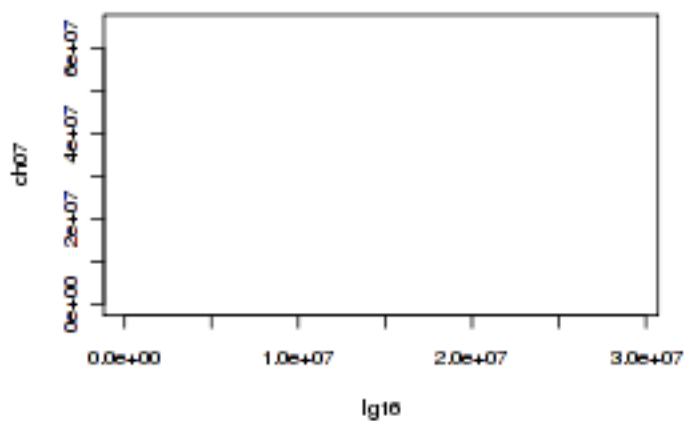

Tobacco lg16 and tomato ch08

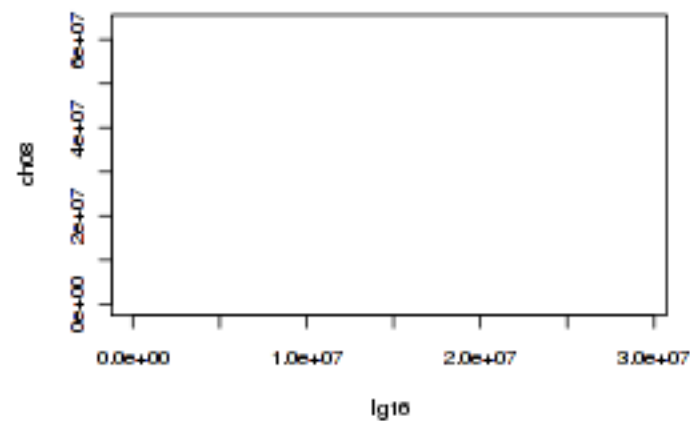

Tobacco lg16 and tomato ch09

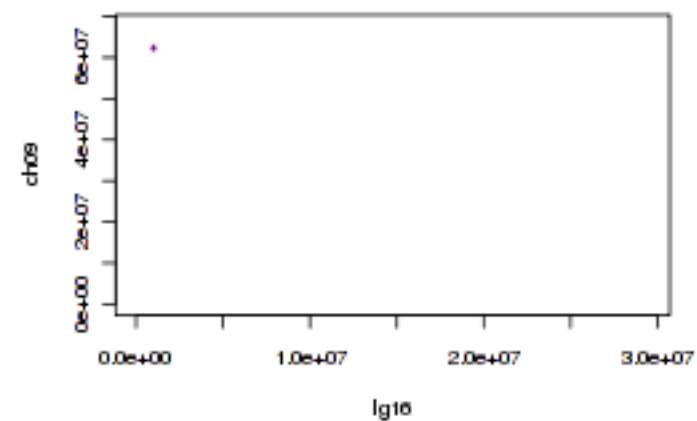

Tobacco lg16 and tomato ch10

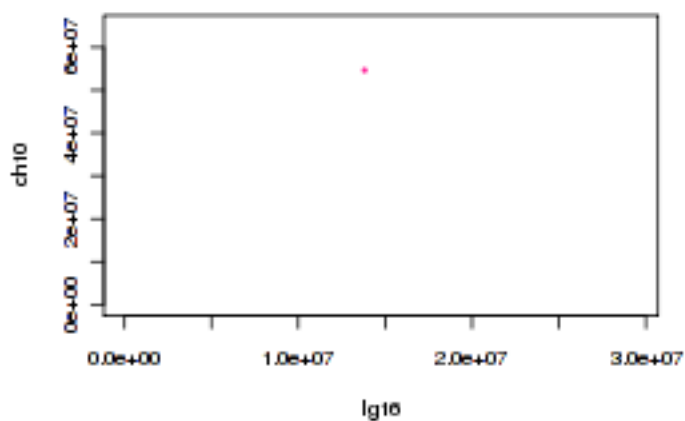

Tobacco lg16 and tomato ch11

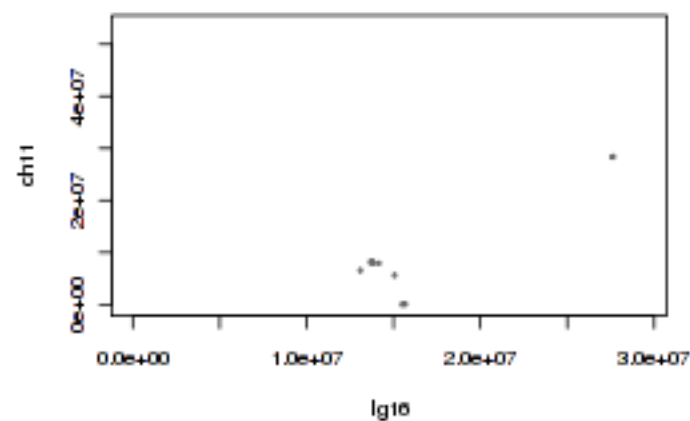

Tobacco lg16 and tomato ch12

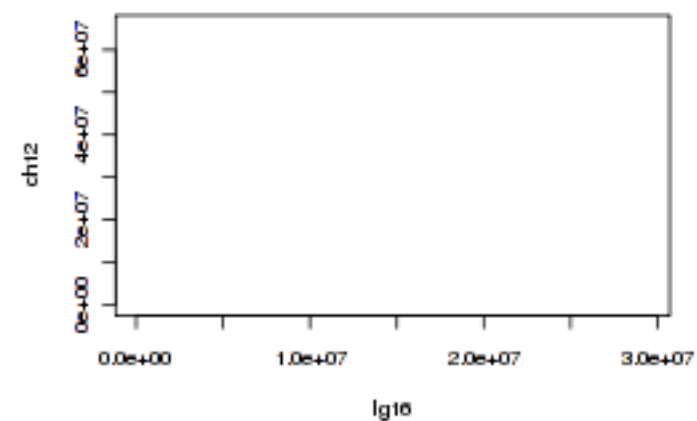



Tobacco lg17 and tomato ch01

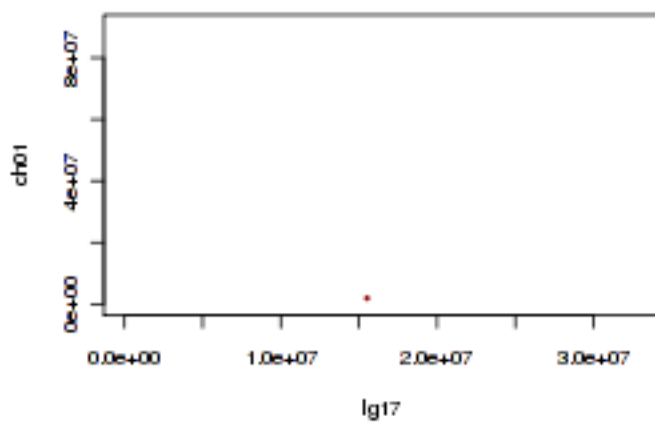

Tobacco lg17 and tomato ch02

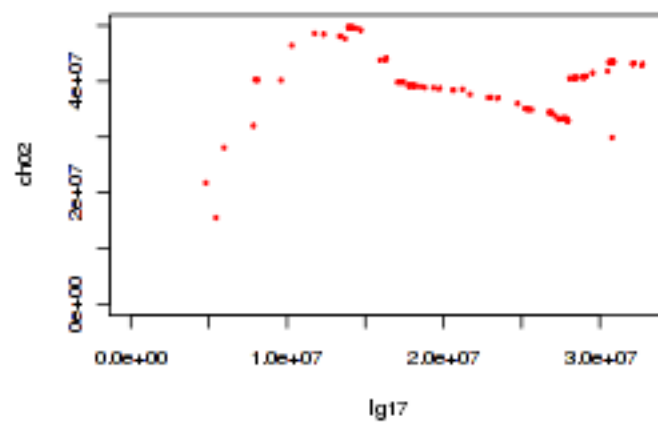

Tobacco lg17 and tomato ch03

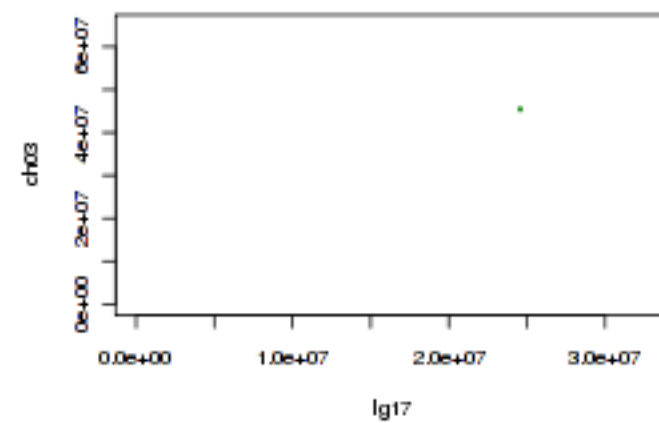

Tobacco lg17 and tomato ch04

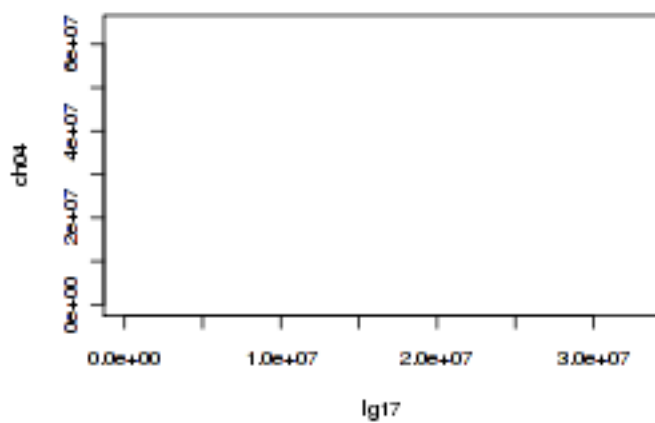

Tobacco lg17 and tomato ch05

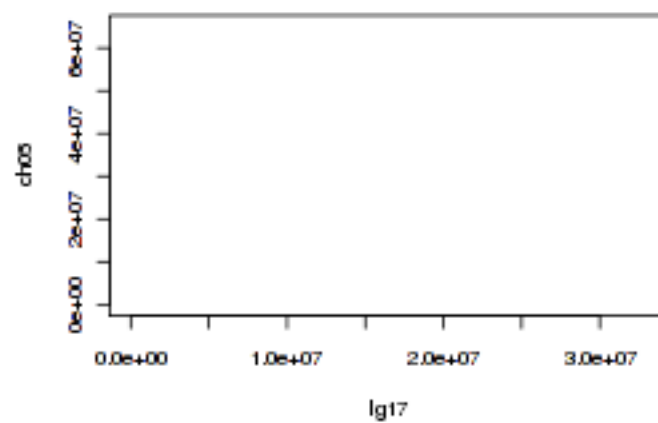

Tobacco lg17 and tomato ch06

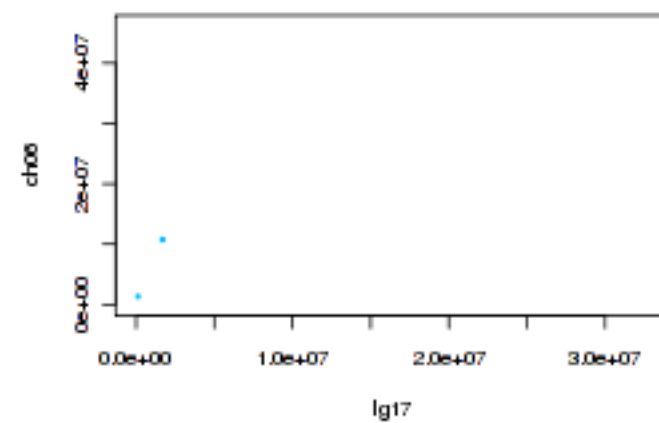

Tobacco lg17 and tomato ch07

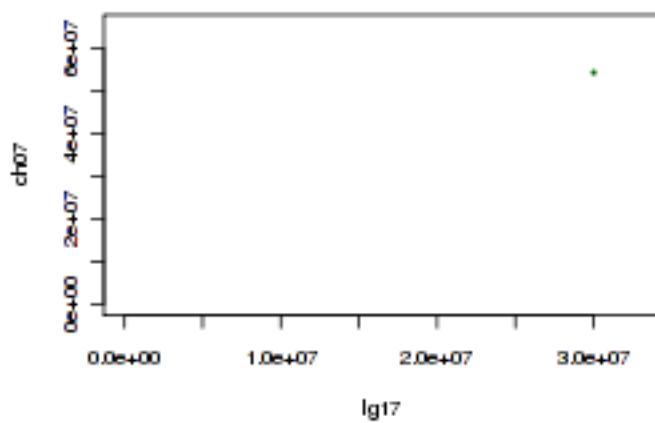

Tobacco lg17 and tomato ch08

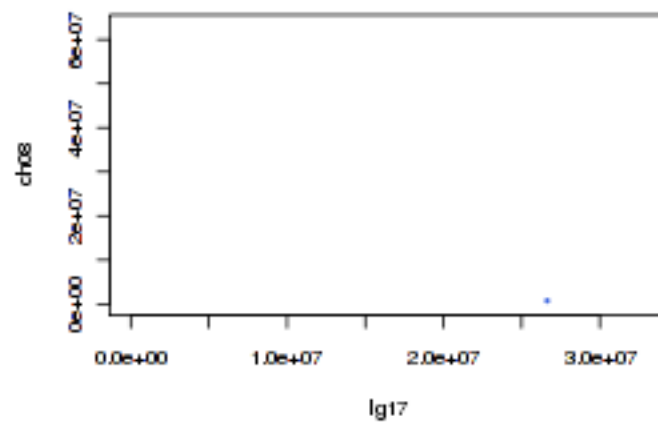

Tobacco lg17 and tomato ch09

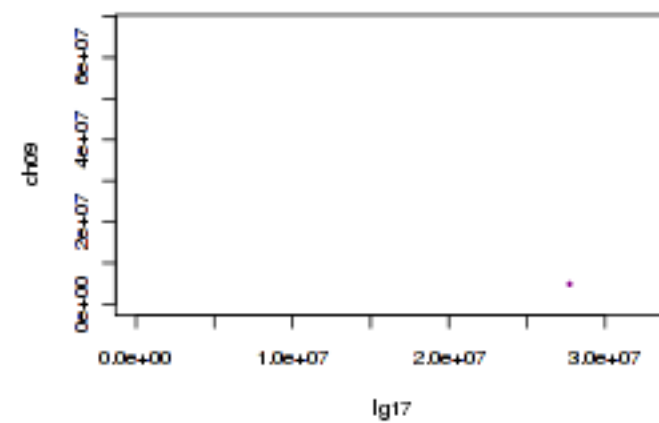

Tobacco lg17 and tomato ch10

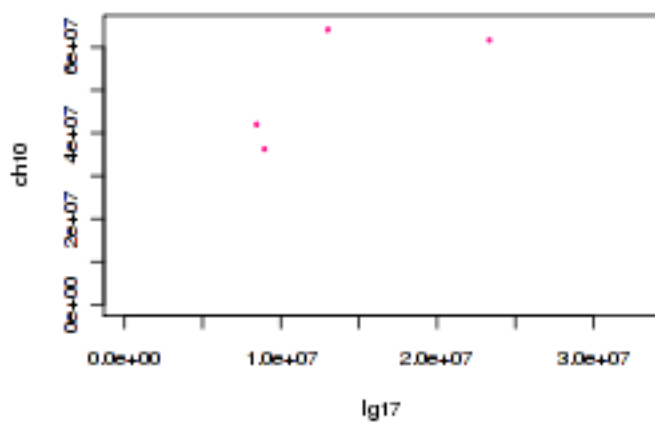

Tobacco lg17 and tomato ch11

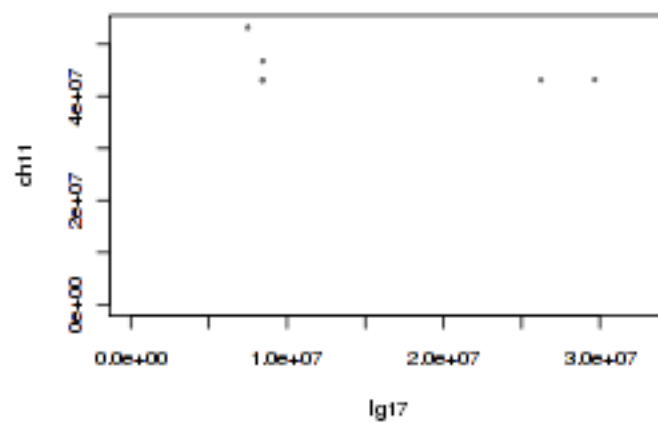

Tobacco lg17 and tomato ch12

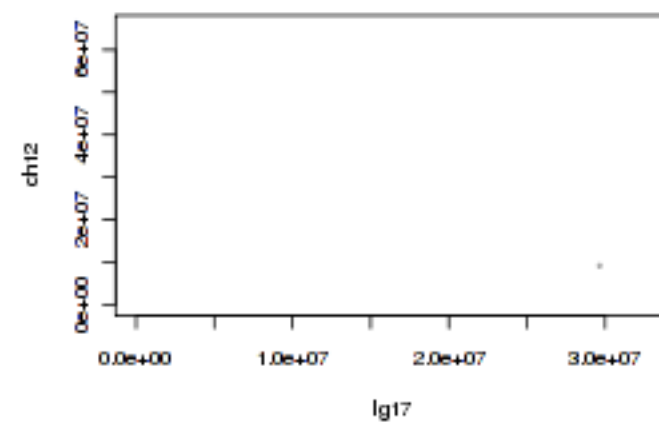

Tobacco lg18 and tomato ch01

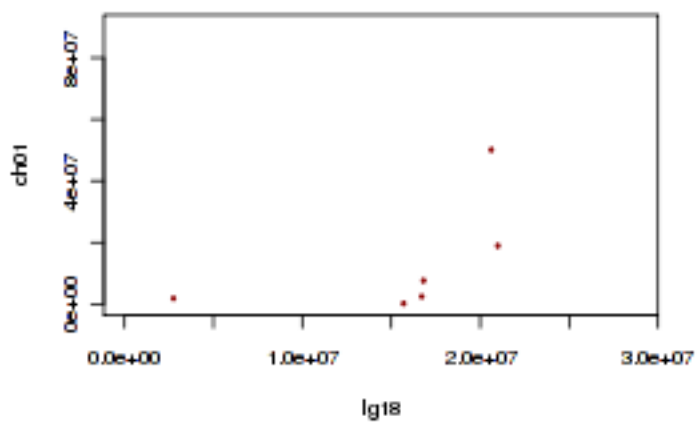

Tobacco lg18 and tomato ch02

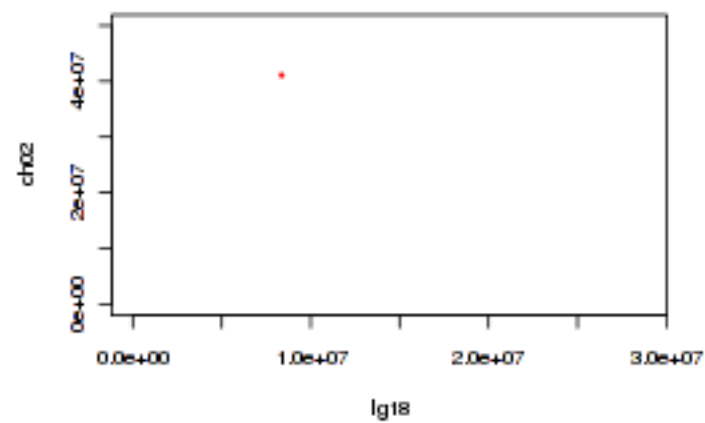

Tobacco lg18 and tomato ch03

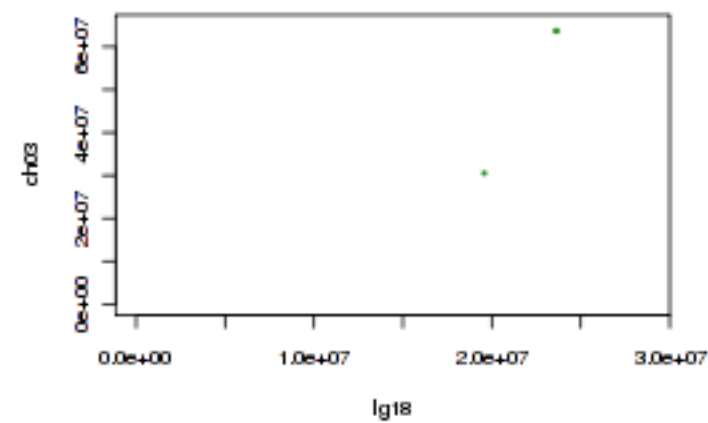

Tobacco lg18 and tomato ch04

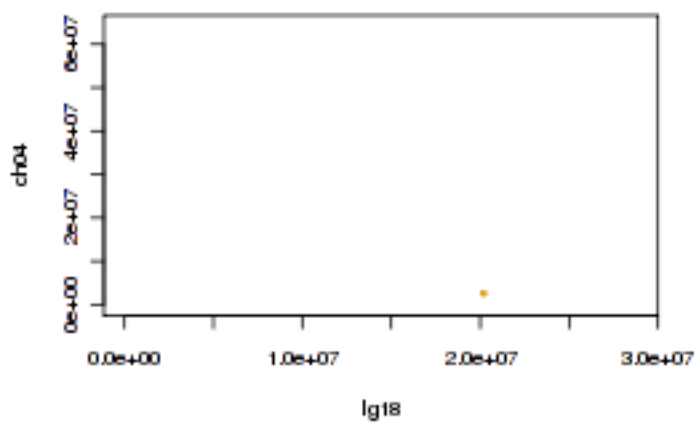

Tobacco lg18 and tomato ch05

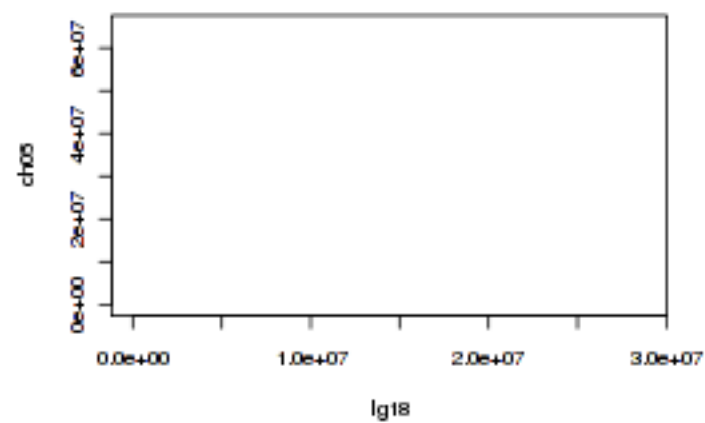

Tobacco lg18 and tomato ch06

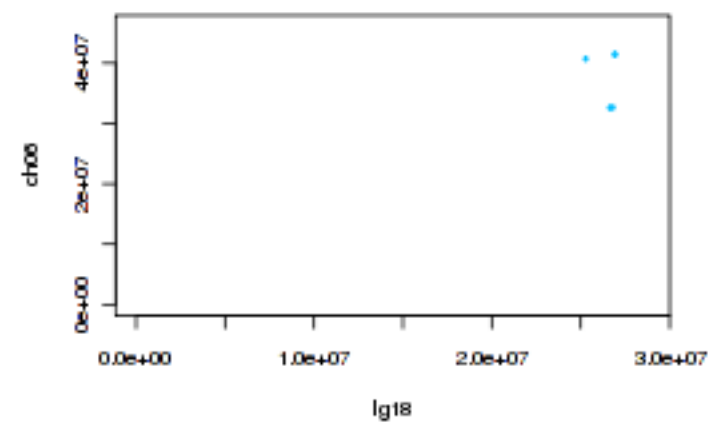

Tobacco lg18 and tomato ch07

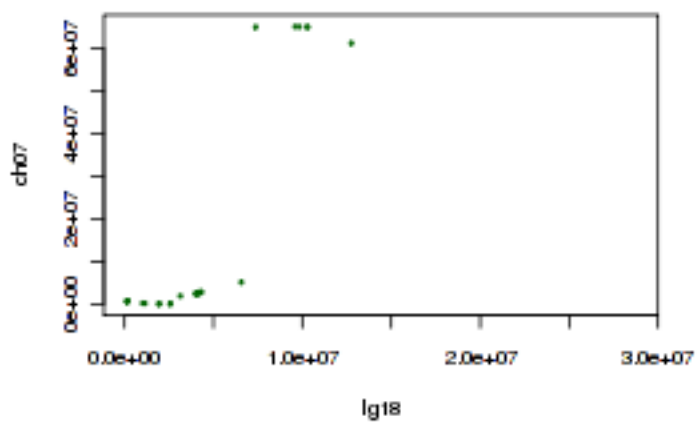

Tobacco lg18 and tomato ch08

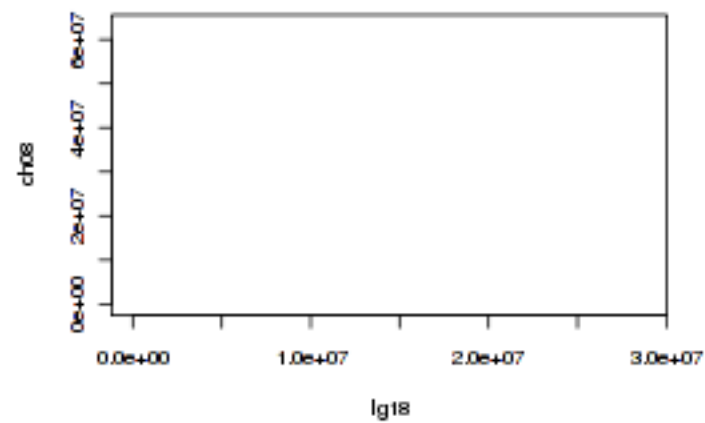

Tobacco lg18 and tomato ch09

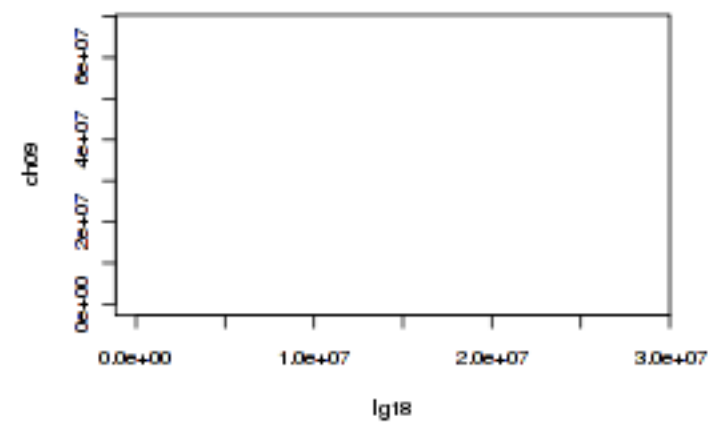

Tobacco lg18 and tomato ch10

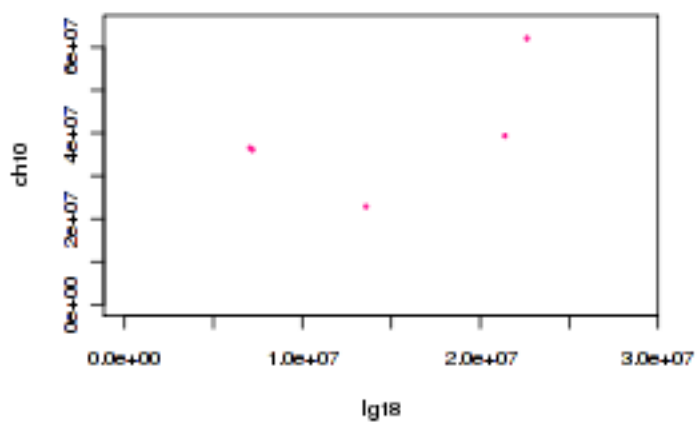

Tobacco lg18 and tomato ch11

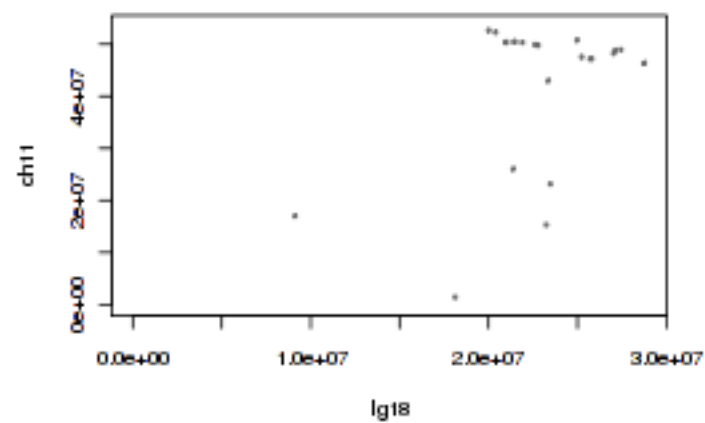

Tobacco lg18 and tomato ch12

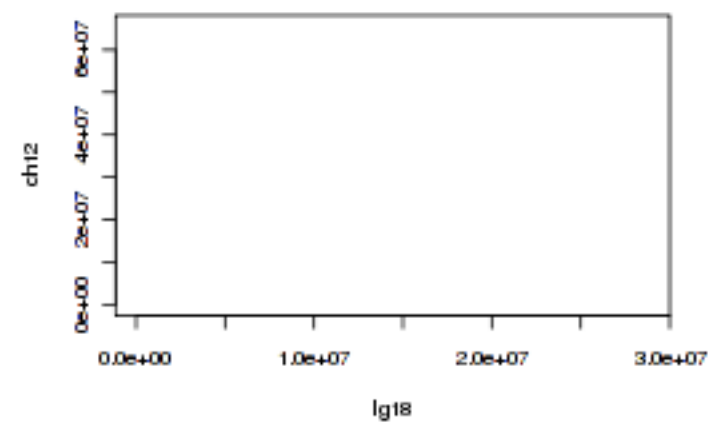

Tobacco lg19 and tomato ch01

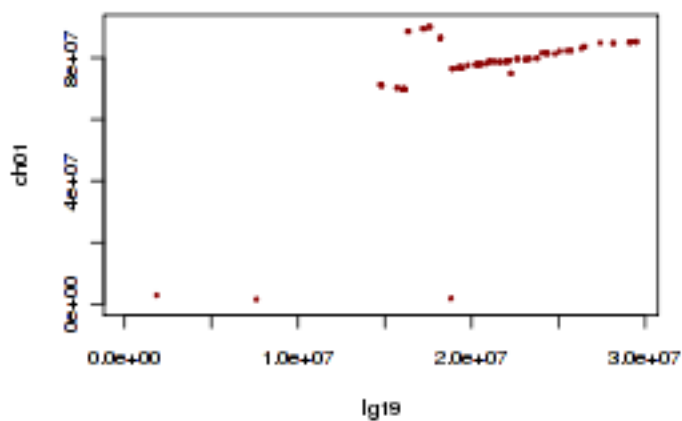

Tobacco lg19 and tomato ch02

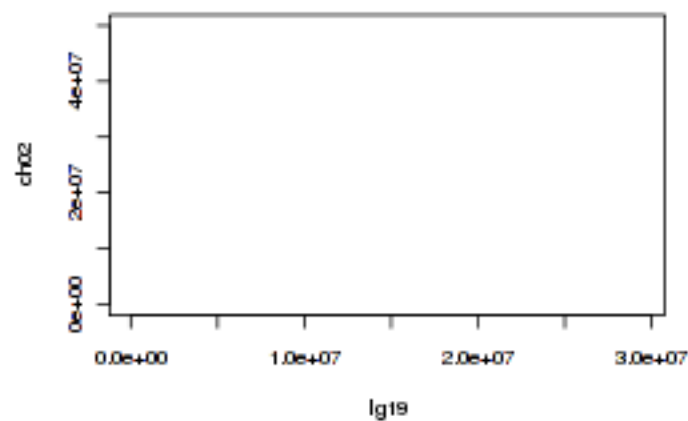

Tobacco lg19 and tomato ch03

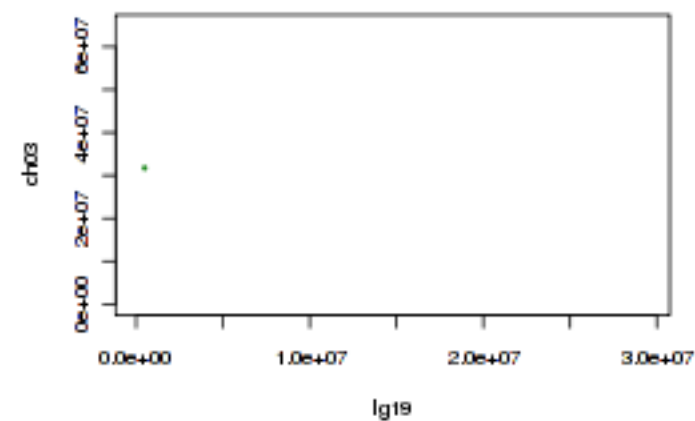

Tobacco lg19 and tomato ch04

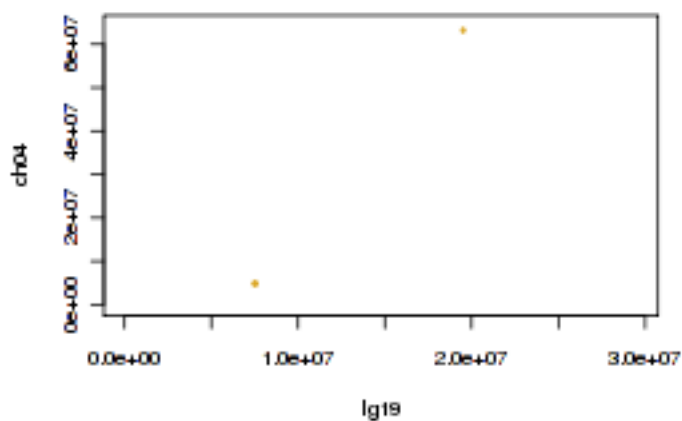

Tobacco lg19 and tomato ch05

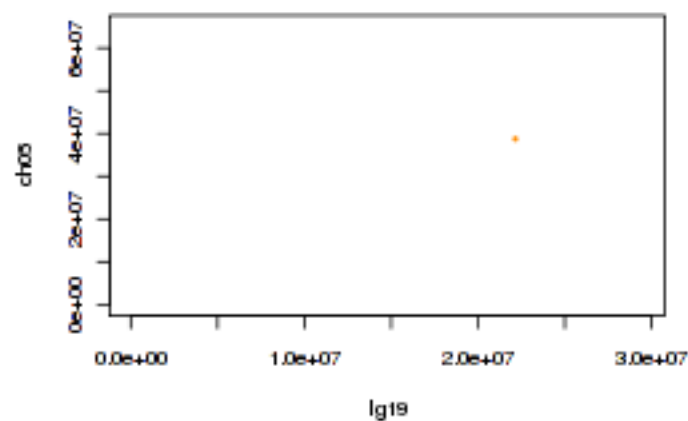

Tobacco lg19 and tomato ch06

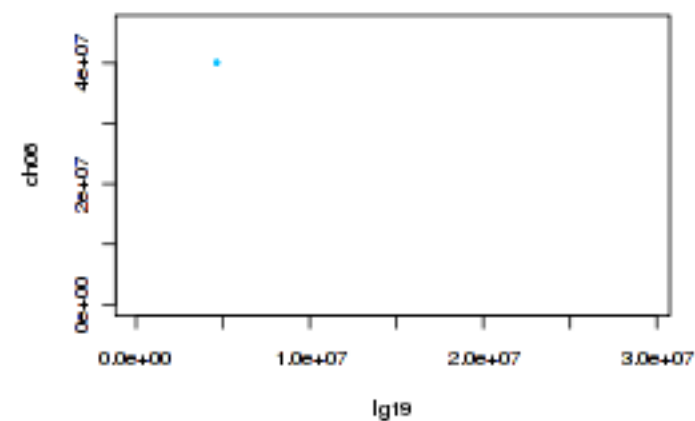

Tobacco lg19 and tomato ch07

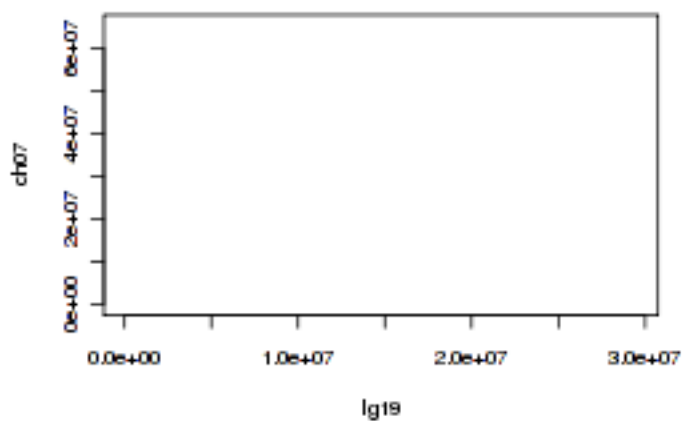

Tobacco lg19 and tomato ch08

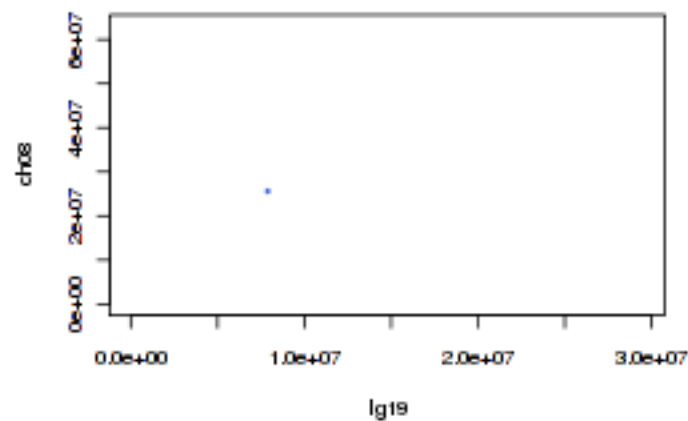

Tobacco lg19 and tomato ch09

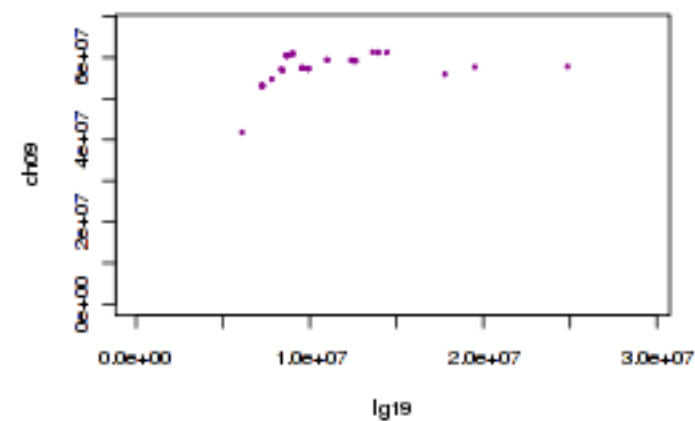

Tobacco lg19 and tomato ch10

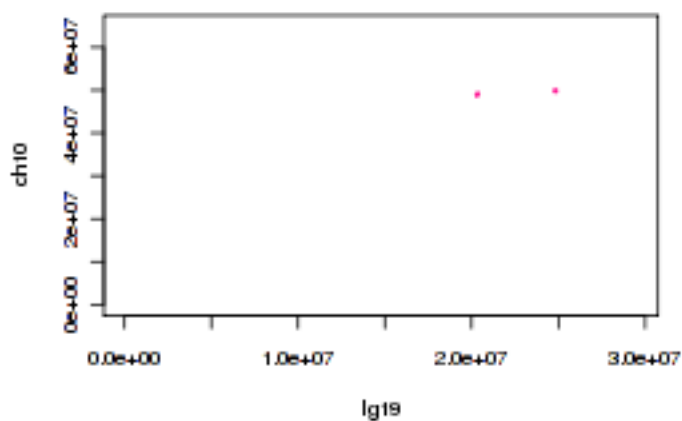

Tobacco lg19 and tomato ch11

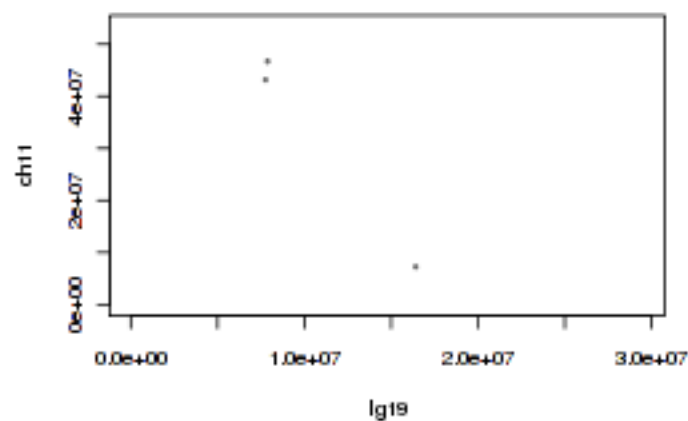

Tobacco lg19 and tomato ch12

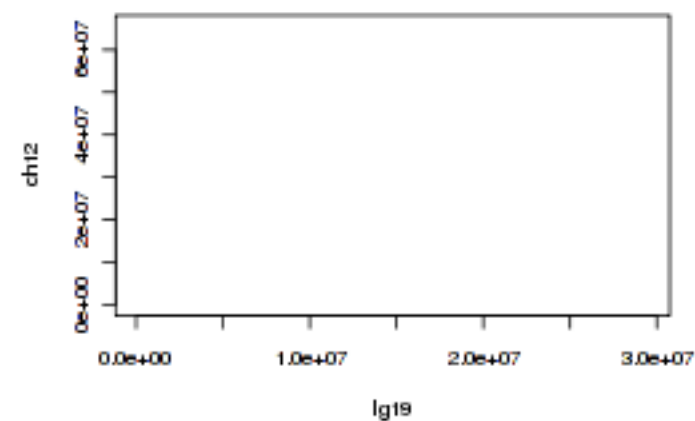

Tobacco Ig20 and tomato ch01

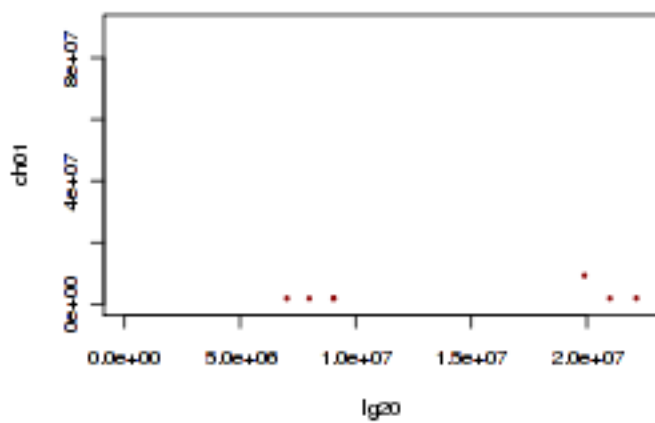

Tobacco Ig20 and tomato ch02

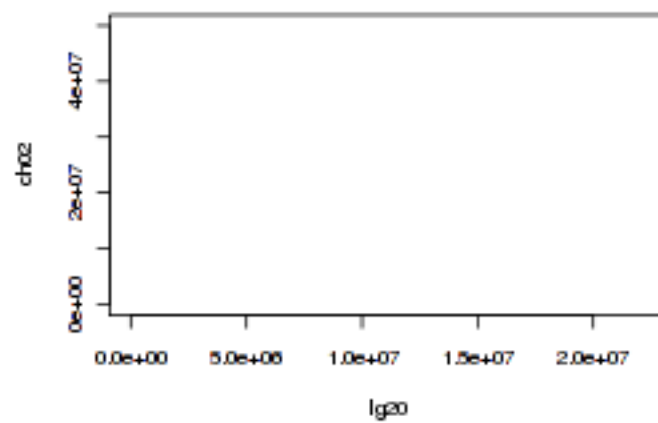

Tobacco Ig20 and tomato ch03

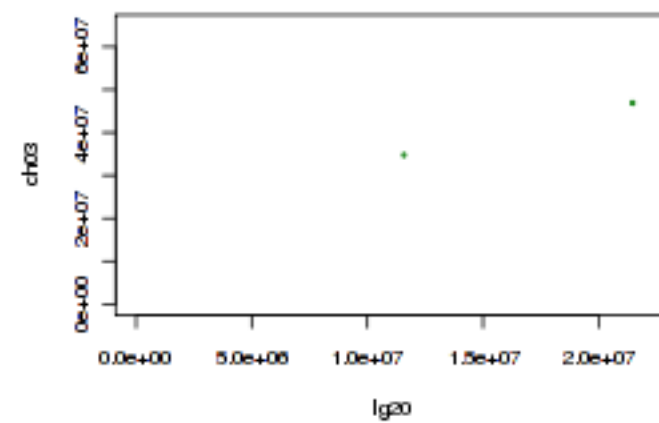

Tobacco Ig20 and tomato ch04

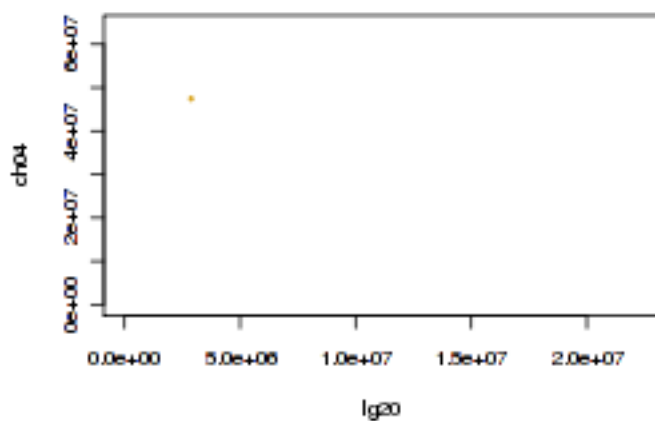

Tobacco Ig20 and tomato ch05

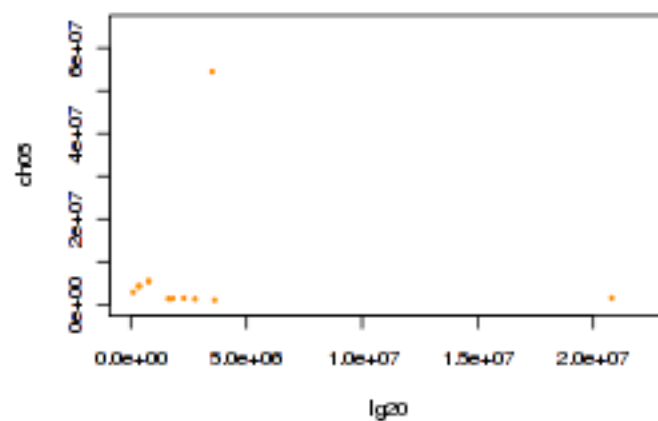

Tobacco Ig20 and tomato ch06

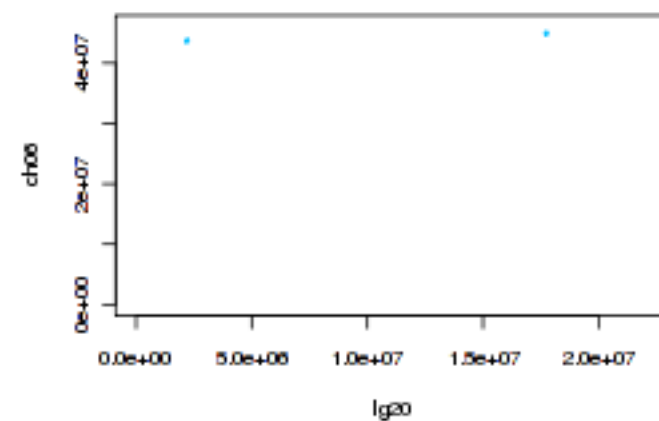

Tobacco Ig20 and tomato ch07

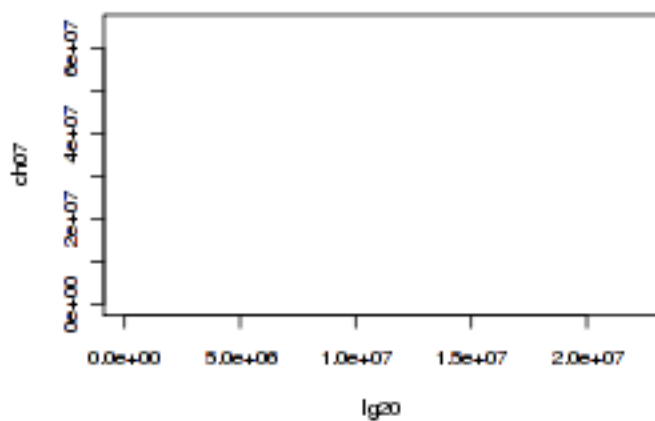

Tobacco Ig20 and tomato ch08

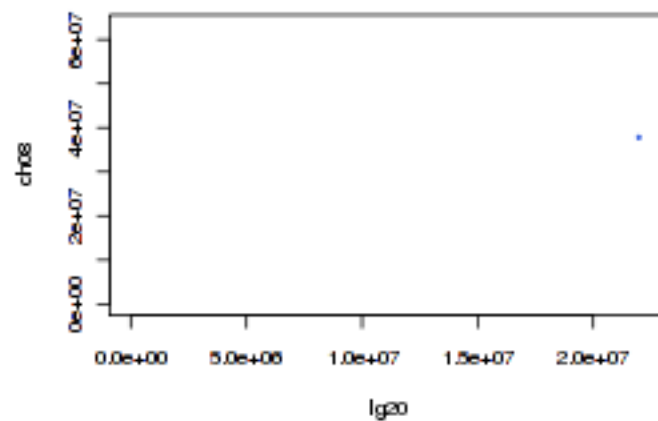

Tobacco Ig20 and tomato ch09

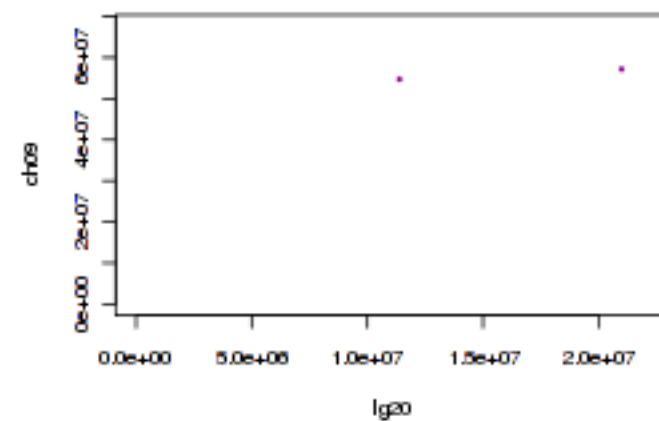

Tobacco Ig20 and tomato ch10

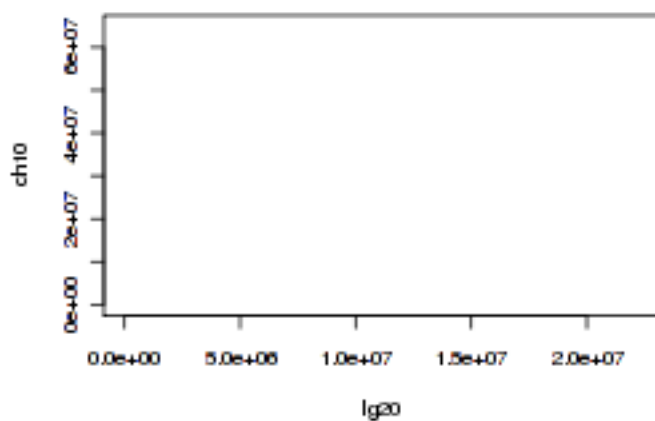

Tobacco Ig20 and tomato ch11

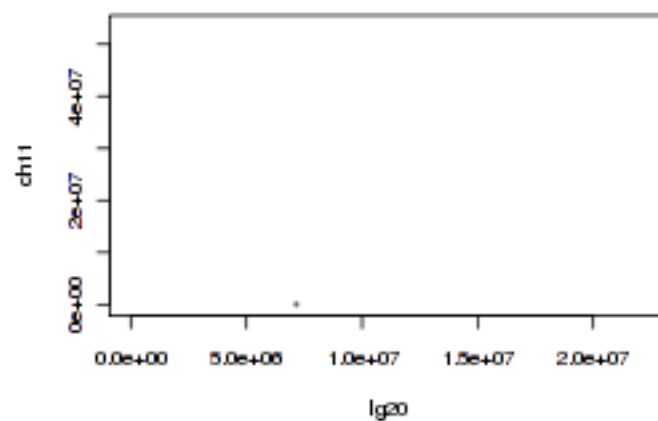

Tobacco Ig20 and tomato ch12

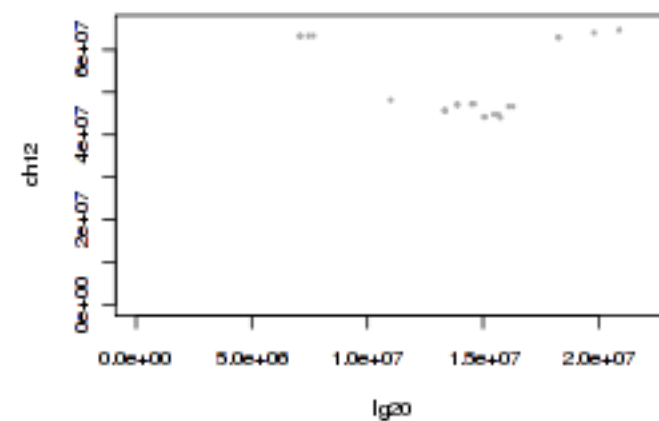

Tobacco lg21 and tomato ch01

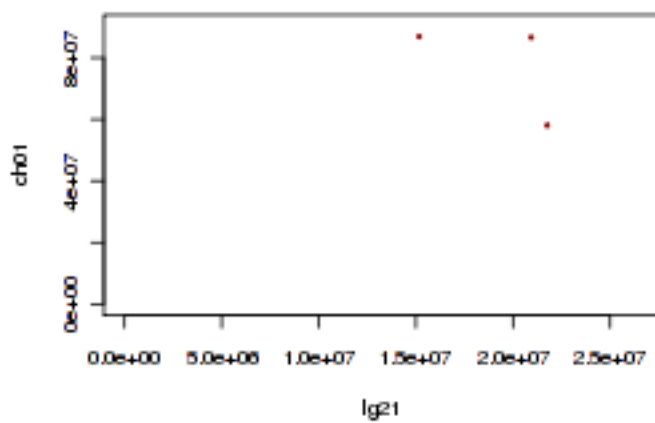

Tobacco lg21 and tomato ch02

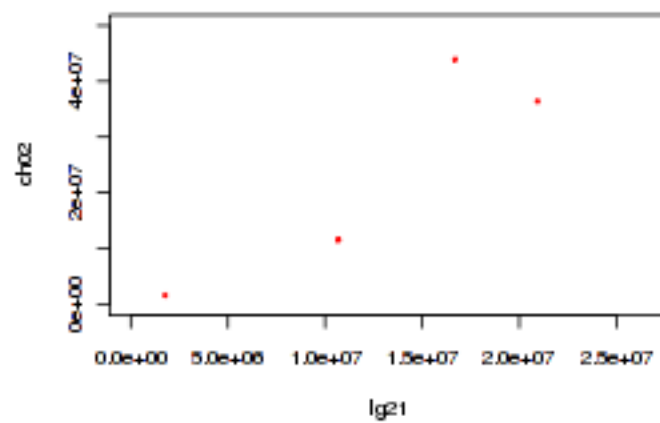

Tobacco lg21 and tomato ch03

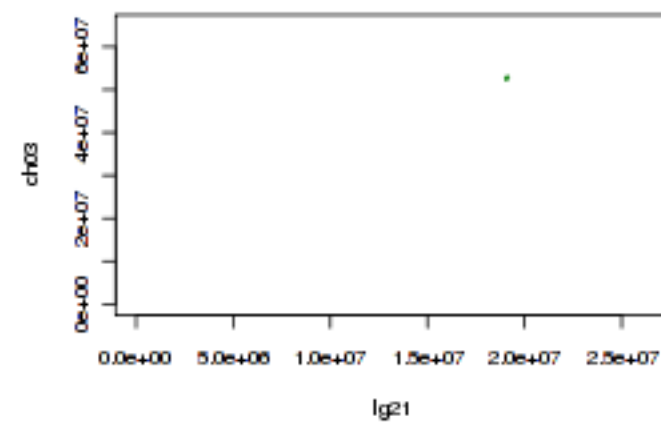

Tobacco lg21 and tomato ch04

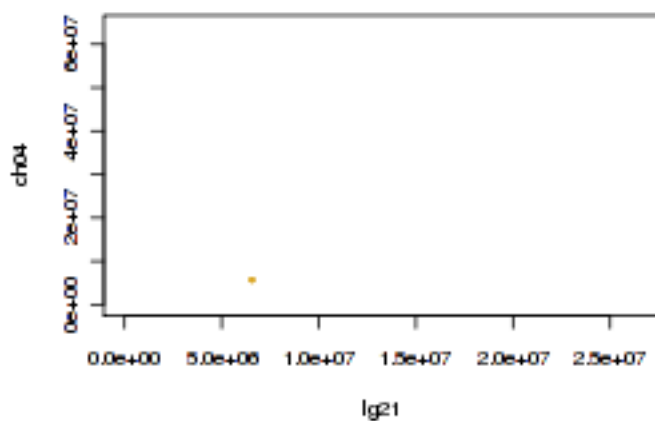

Tobacco lg21 and tomato ch05

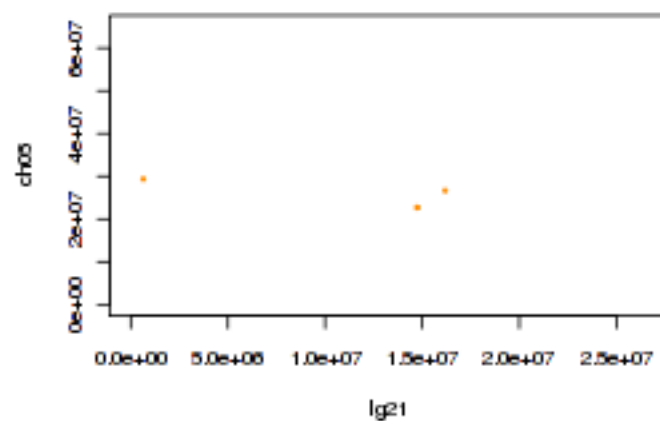

Tobacco lg21 and tomato ch06

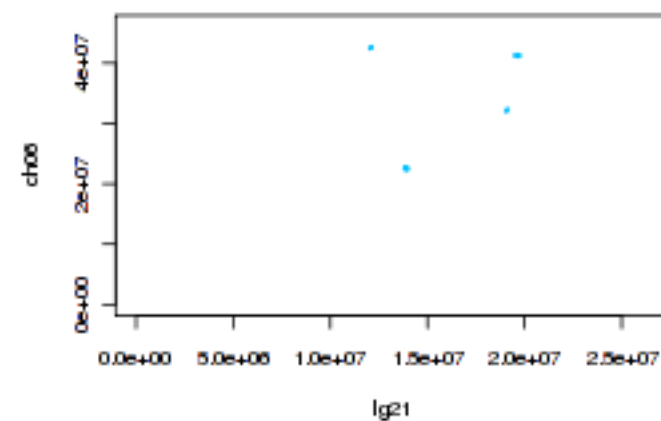

Tobacco lg21 and tomato ch07

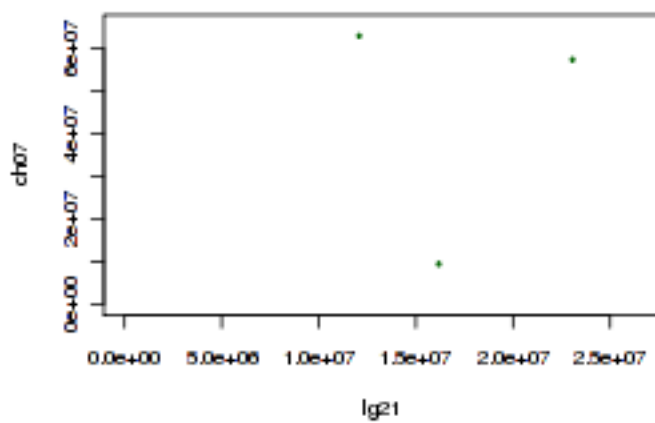

Tobacco lg21 and tomato ch08

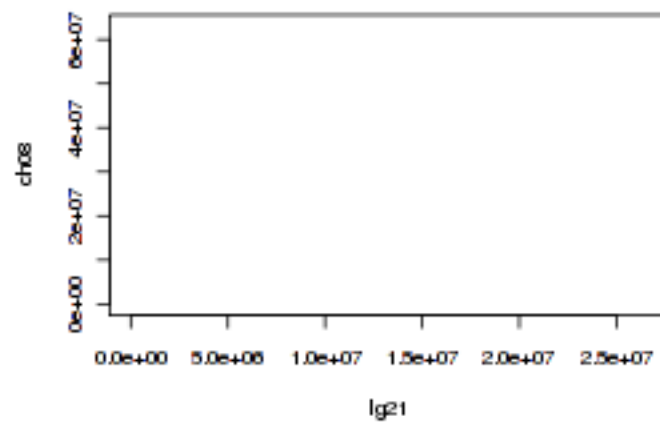

Tobacco lg21 and tomato ch09

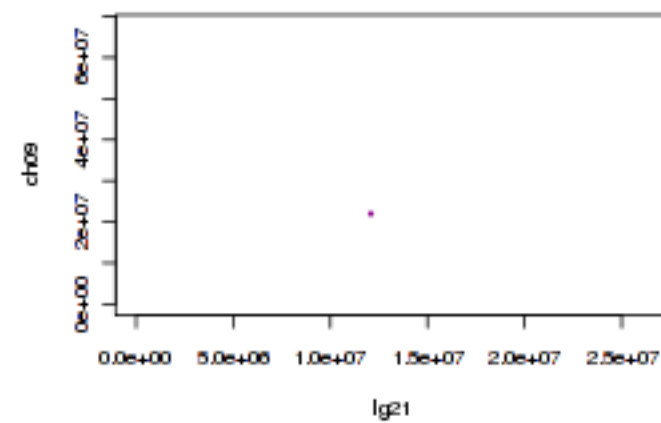

Tobacco lg21 and tomato ch10

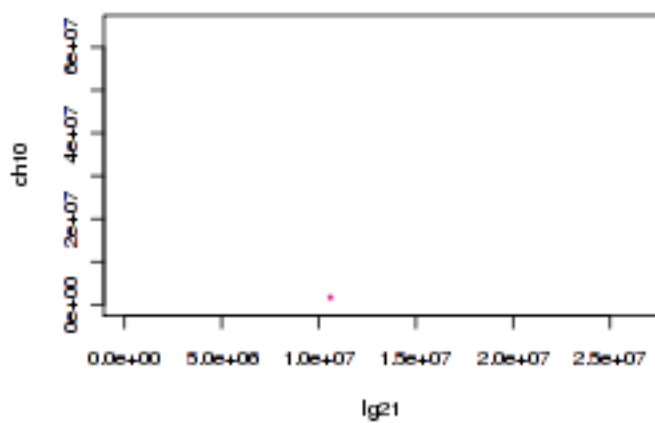

Tobacco lg21 and tomato ch11

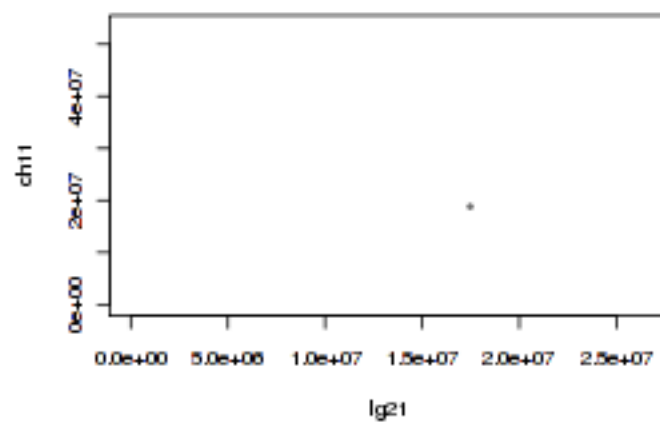

Tobacco lg21 and tomato ch12

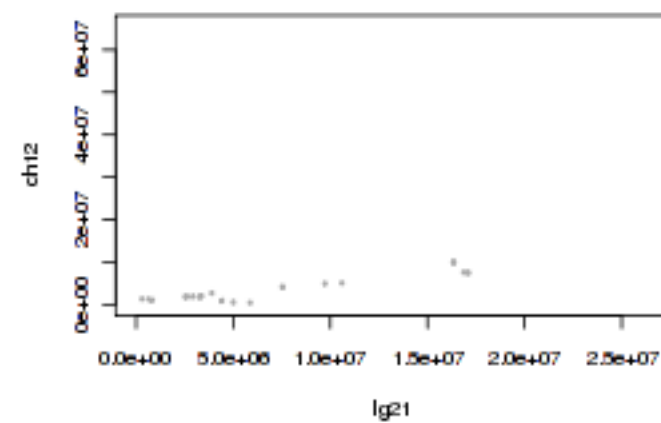

Tobacco Ig22 and tomato ch01

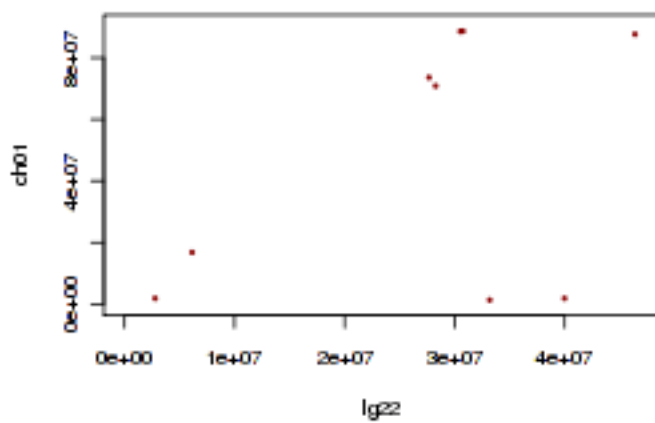

Tobacco Ig22 and tomato ch02

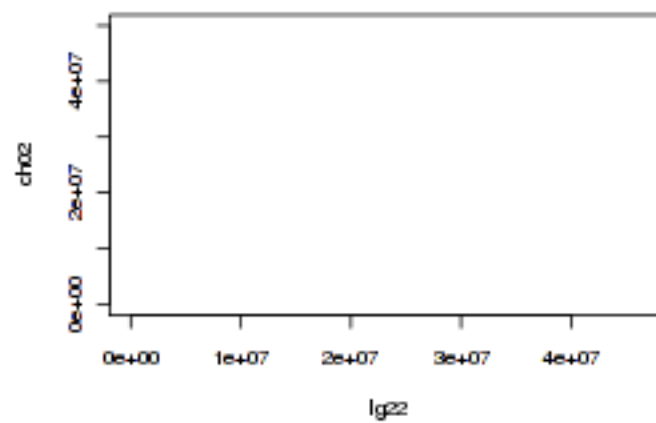

Tobacco Ig22 and tomato ch03

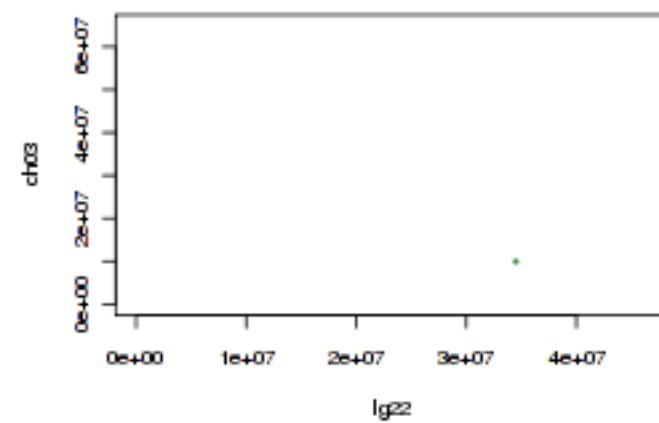

Tobacco Ig22 and tomato ch04

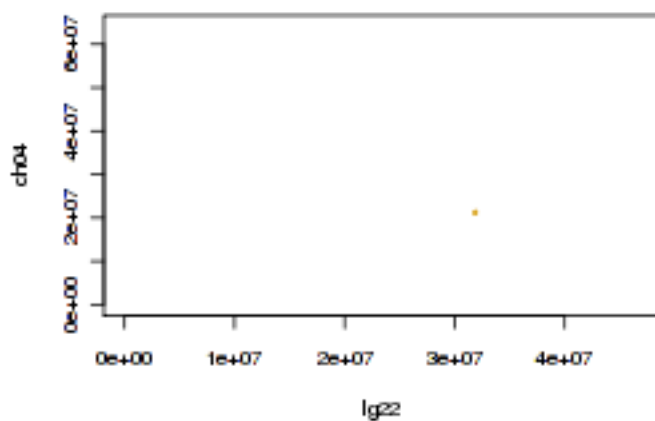

Tobacco Ig22 and tomato ch05

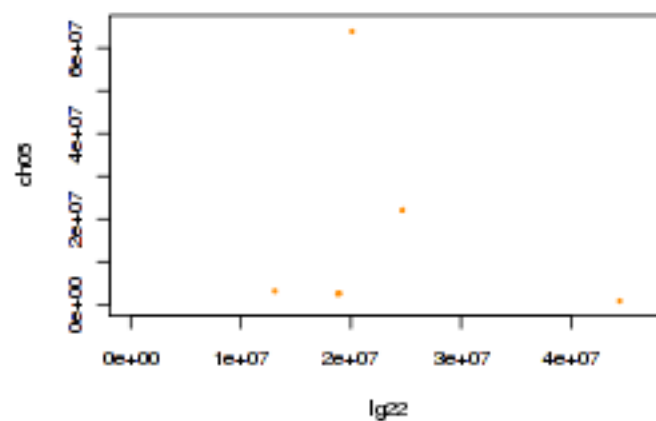

Tobacco Ig22 and tomato ch06

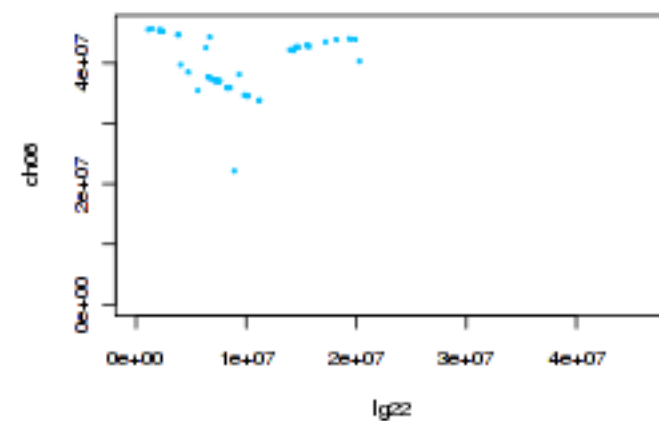

Tobacco Ig22 and tomato ch07

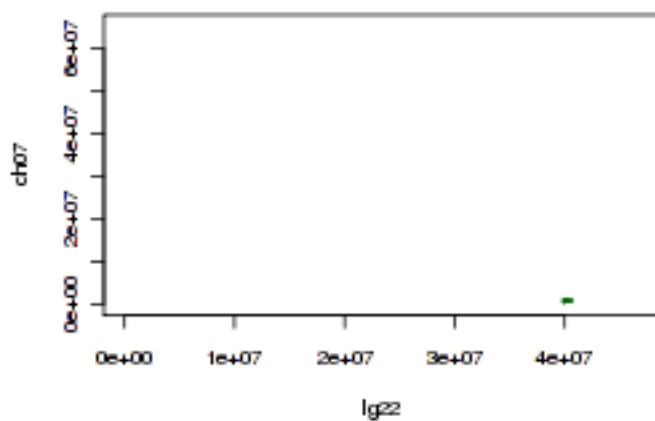

Tobacco Ig22 and tomato ch08

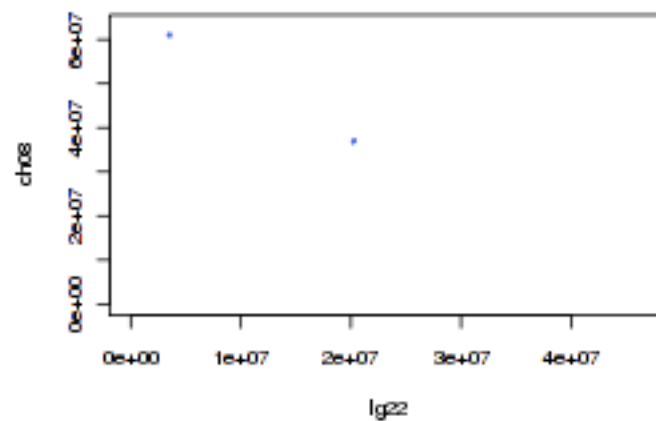

Tobacco Ig22 and tomato ch09

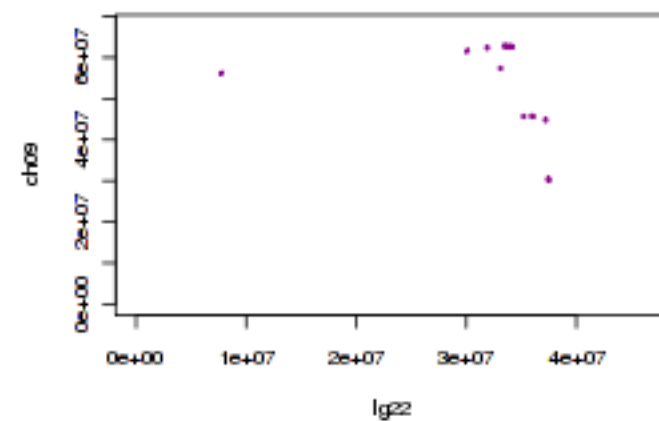

Tobacco Ig22 and tomato ch10

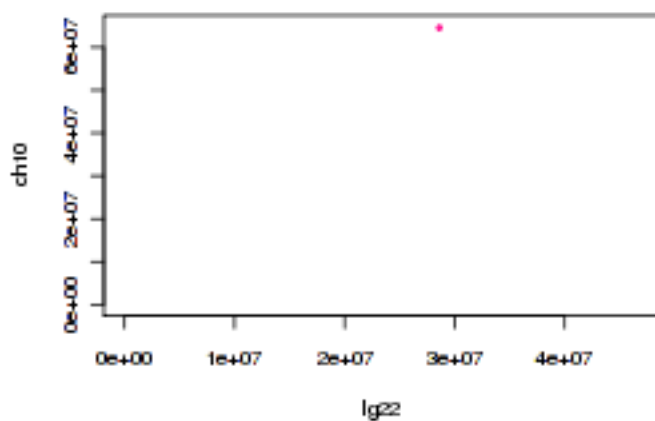

Tobacco Ig22 and tomato ch11

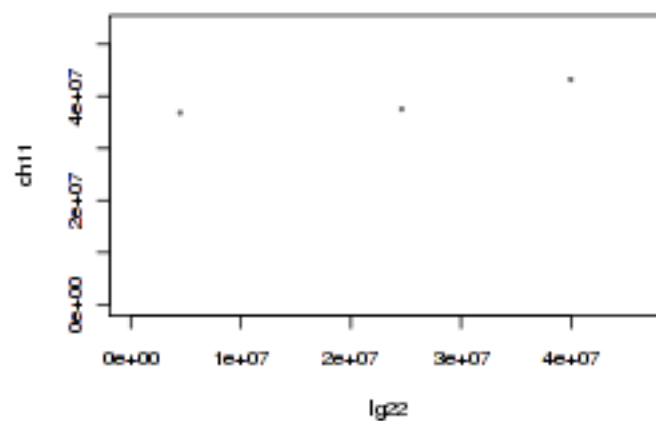

Tobacco Ig22 and tomato ch12

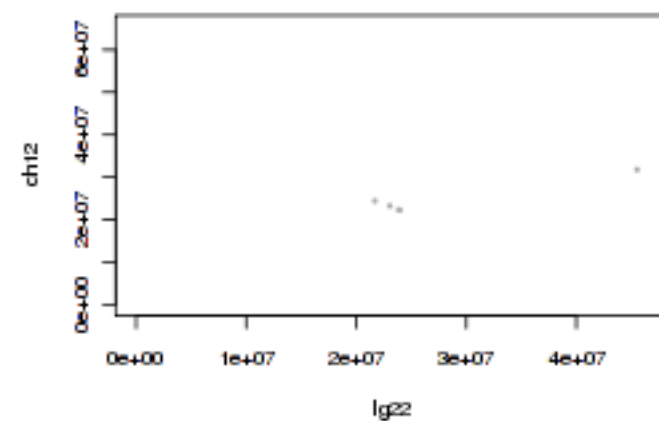

Tobacco Ig23 and tomato ch01

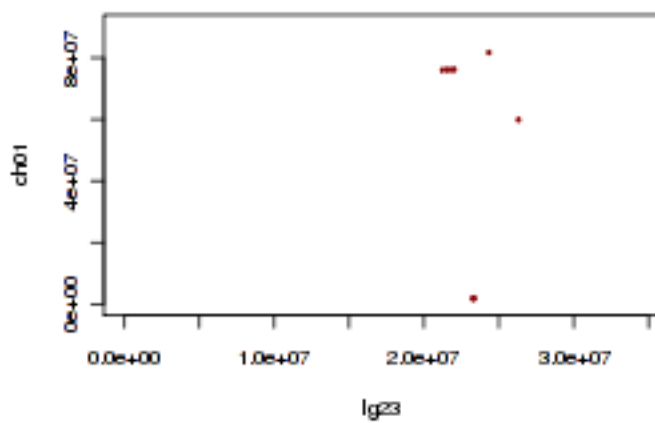

Tobacco Ig23 and tomato ch02

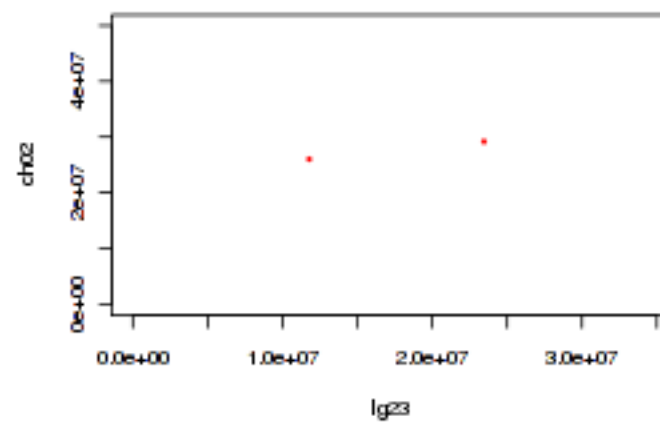

Tobacco Ig23 and tomato ch03

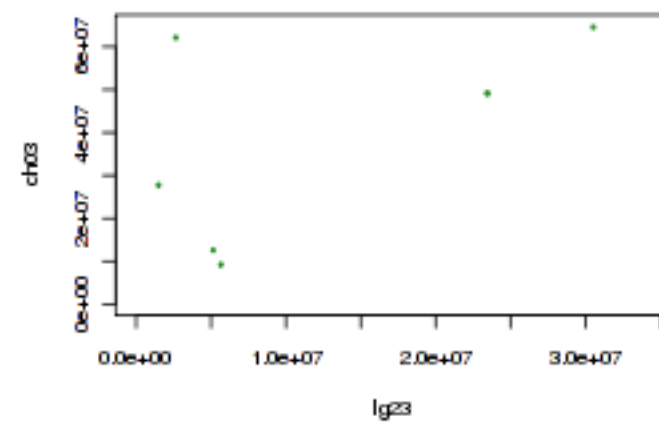

Tobacco Ig23 and tomato ch04

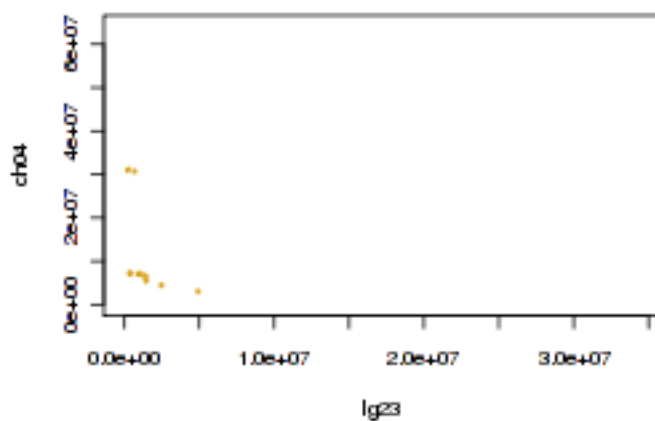

Tobacco Ig23 and tomato ch05

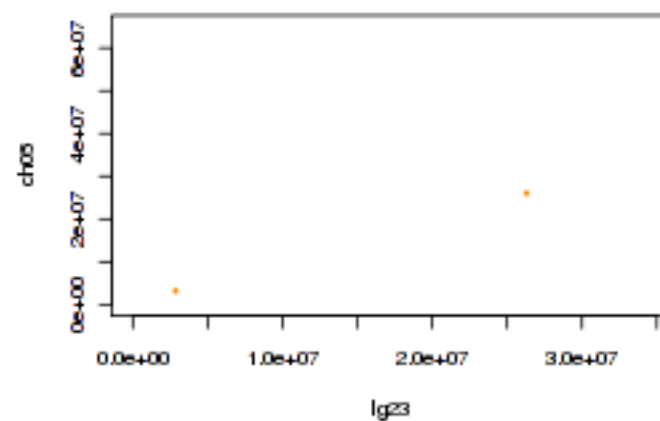

Tobacco Ig23 and tomato ch06

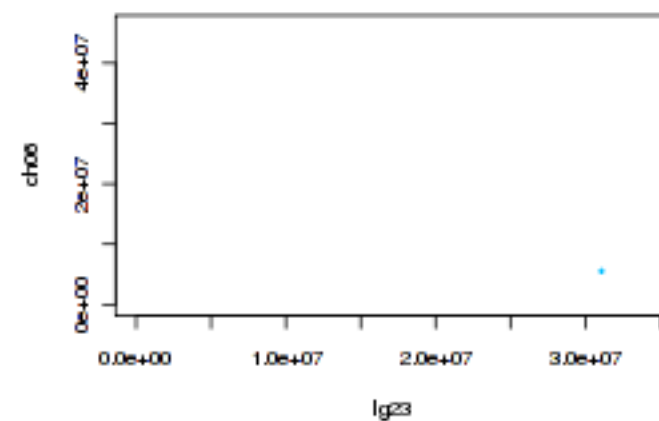

Tobacco Ig23 and tomato ch07

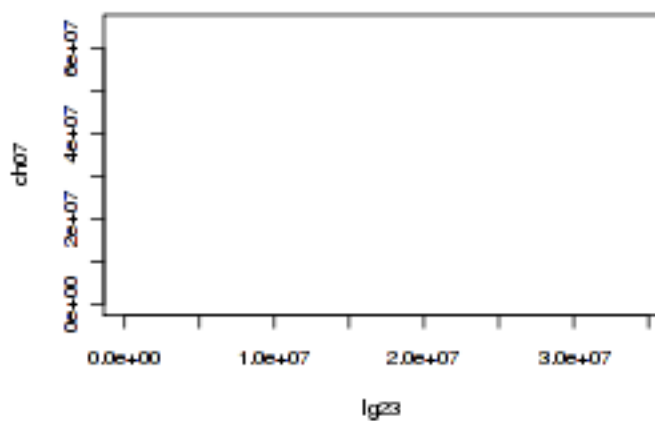

Tobacco Ig23 and tomato ch08

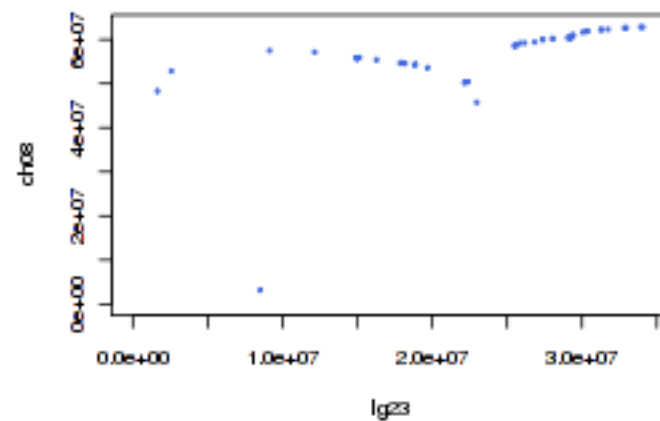

Tobacco Ig23 and tomato ch09

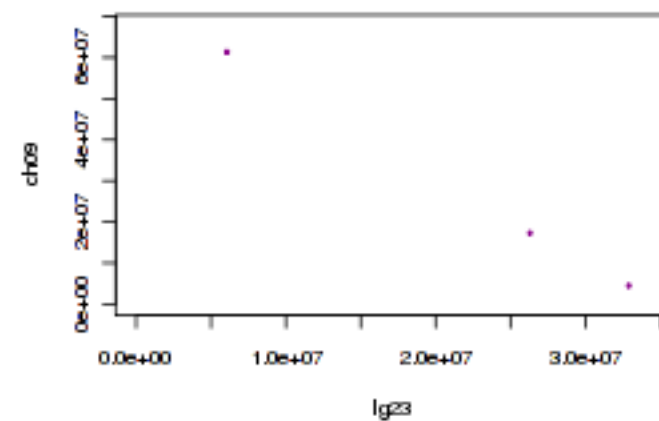

Tobacco Ig23 and tomato ch10

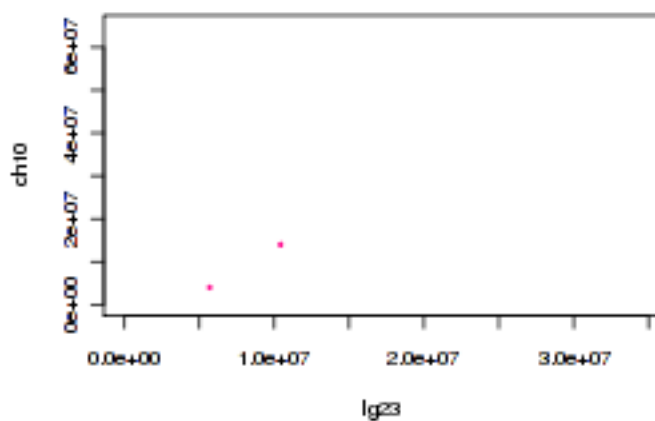

Tobacco Ig23 and tomato ch11

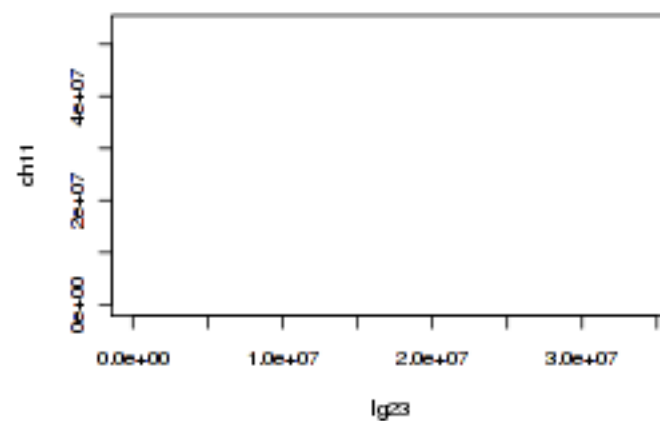

Tobacco Ig23 and tomato ch12

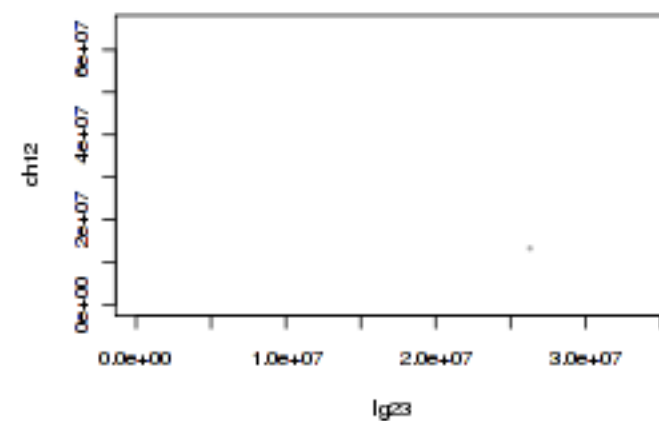

Tobacco Ig24 and tomato ch01

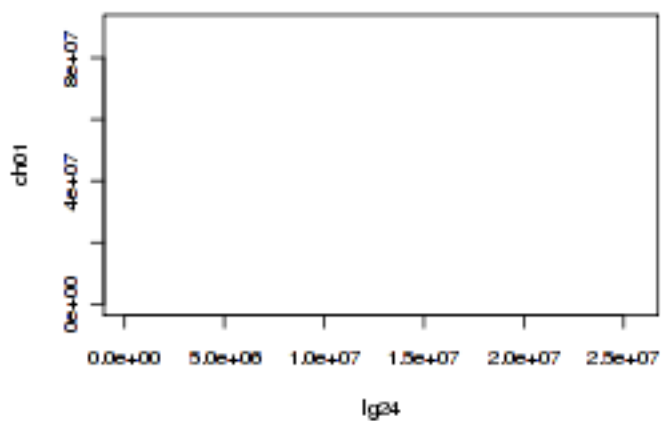

Tobacco Ig24 and tomato ch02

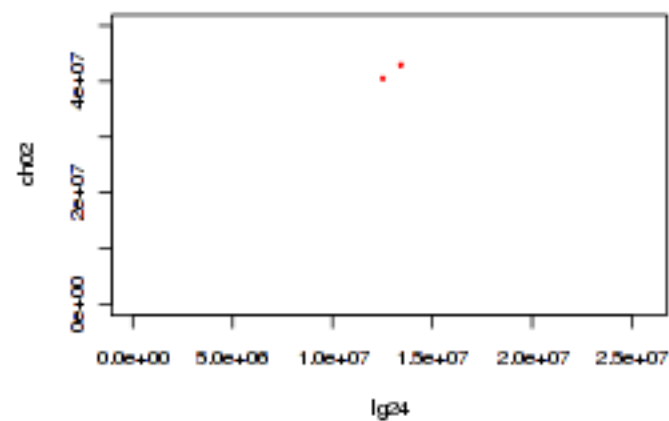

Tobacco Ig24 and tomato ch03

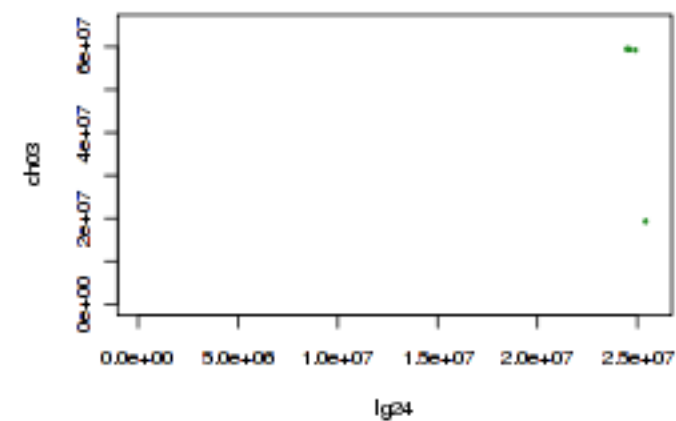

Tobacco Ig24 and tomato ch04

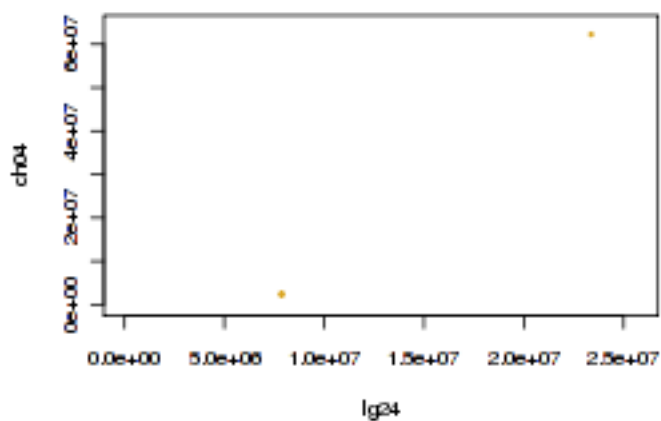

Tobacco Ig24 and tomato ch05

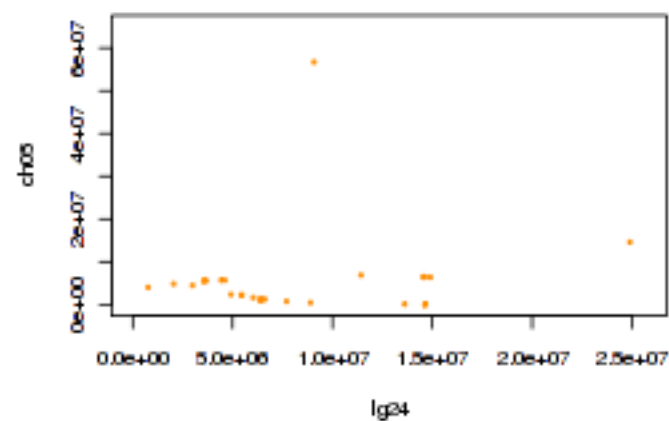

Tobacco Ig24 and tomato ch06

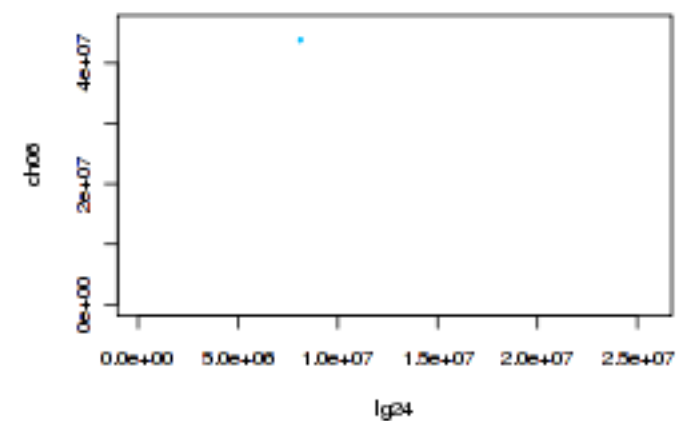

Tobacco Ig24 and tomato ch07

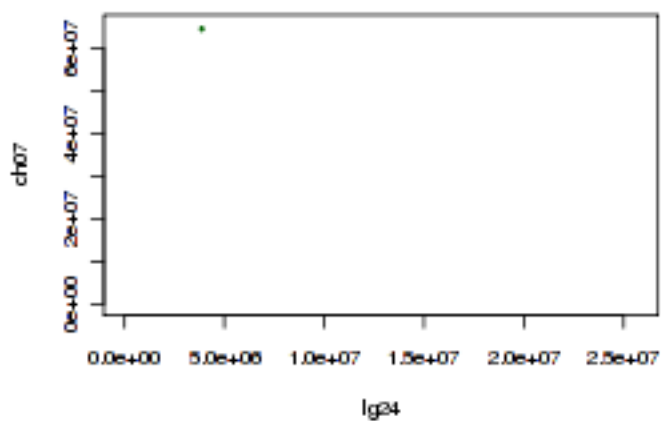

Tobacco Ig24 and tomato ch08

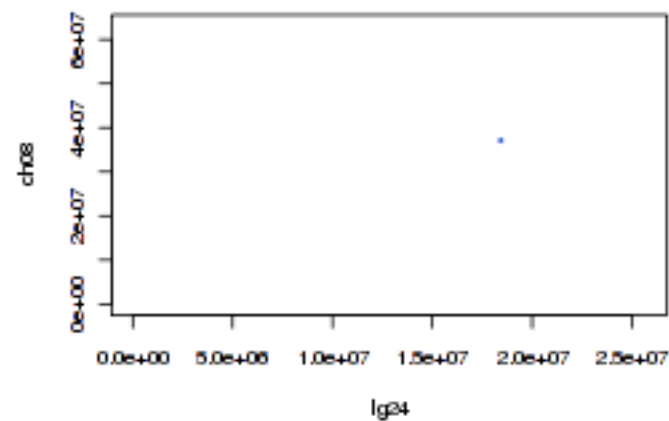

Tobacco Ig24 and tomato ch09

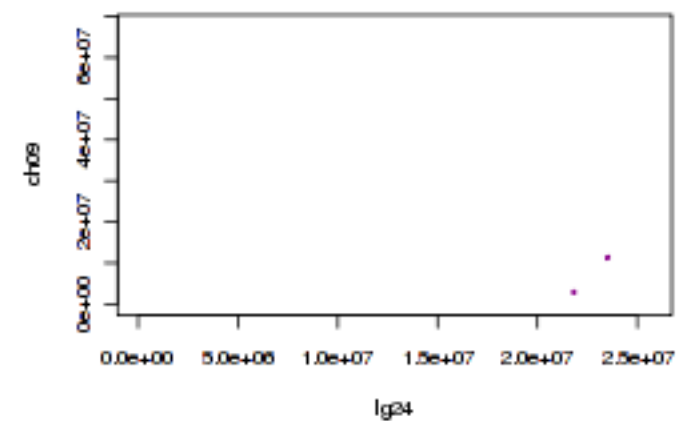

Tobacco Ig24 and tomato ch10

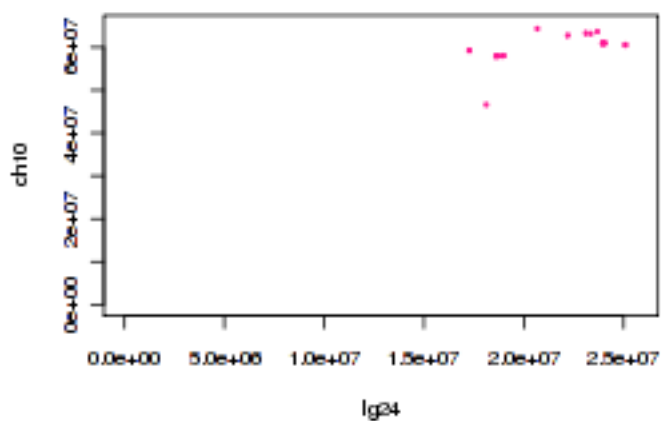

Tobacco Ig24 and tomato ch11

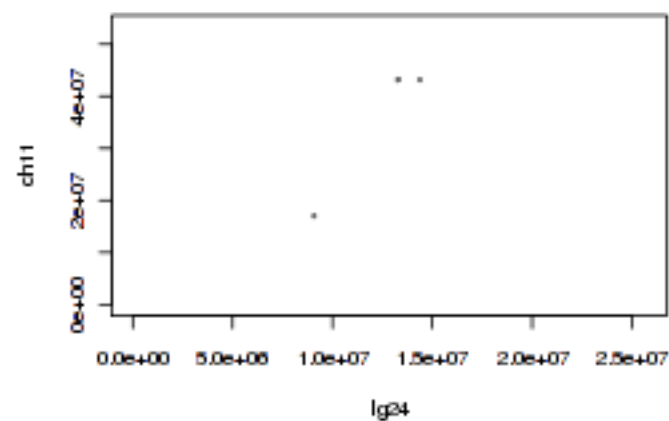

Tobacco Ig24 and tomato ch12

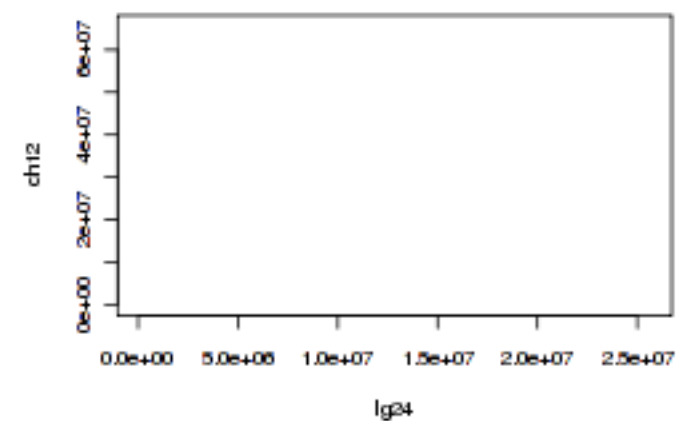

Supplement: ncomms4833-s5.pdf [file ncomms4833-s5.pdf]
