# Supplementary material for: The tobacco genome sequence and its comparison with those of tomato and potato
Source: PubMed Central journal article supplement (PMC4024737; doi:10.1038/ncomms4833), 2014-05-08
Supplement: ncomms4833-s2.pdf [file ncomms4833-s2.pdf]

# BAC 1

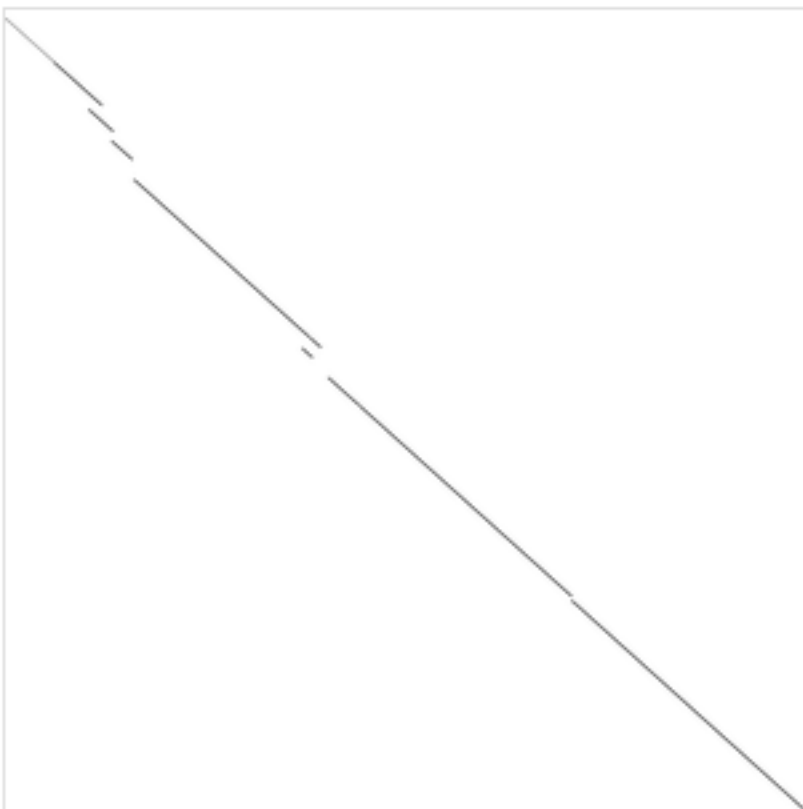

TN90

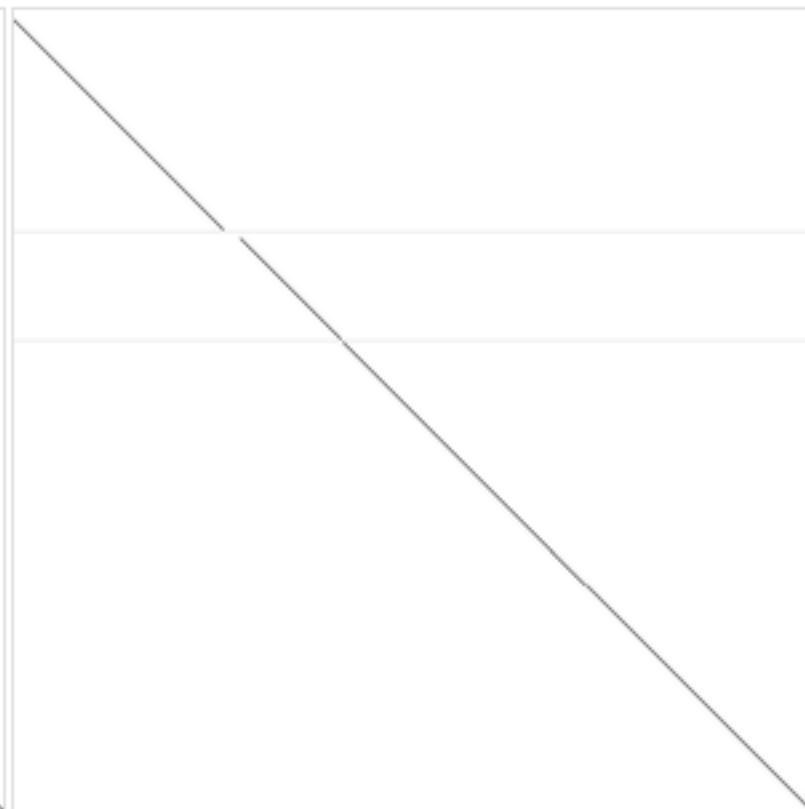

K326

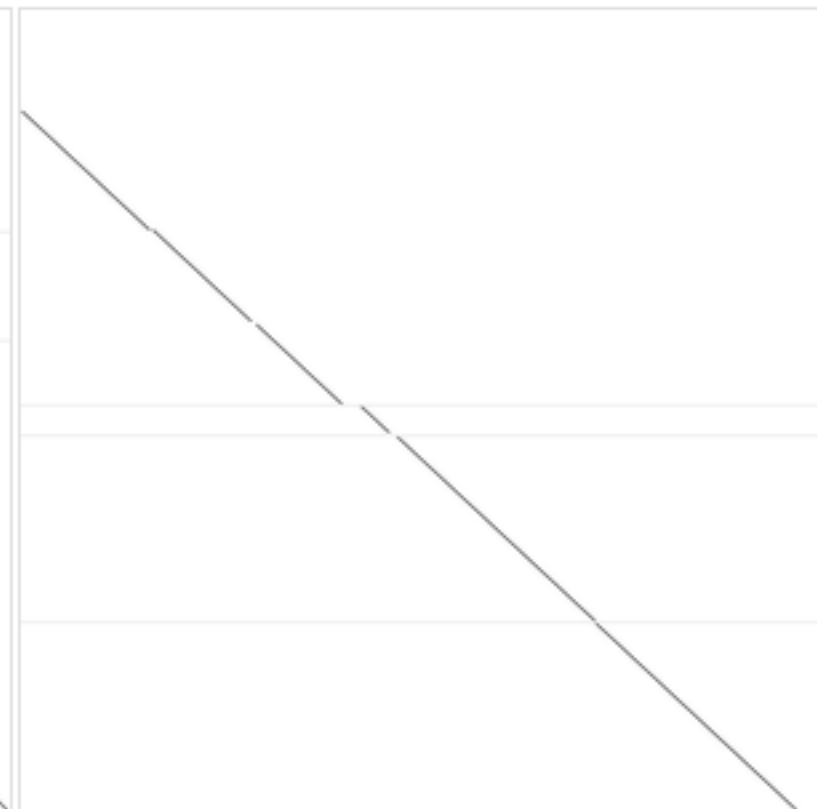

BX

# BAC 2

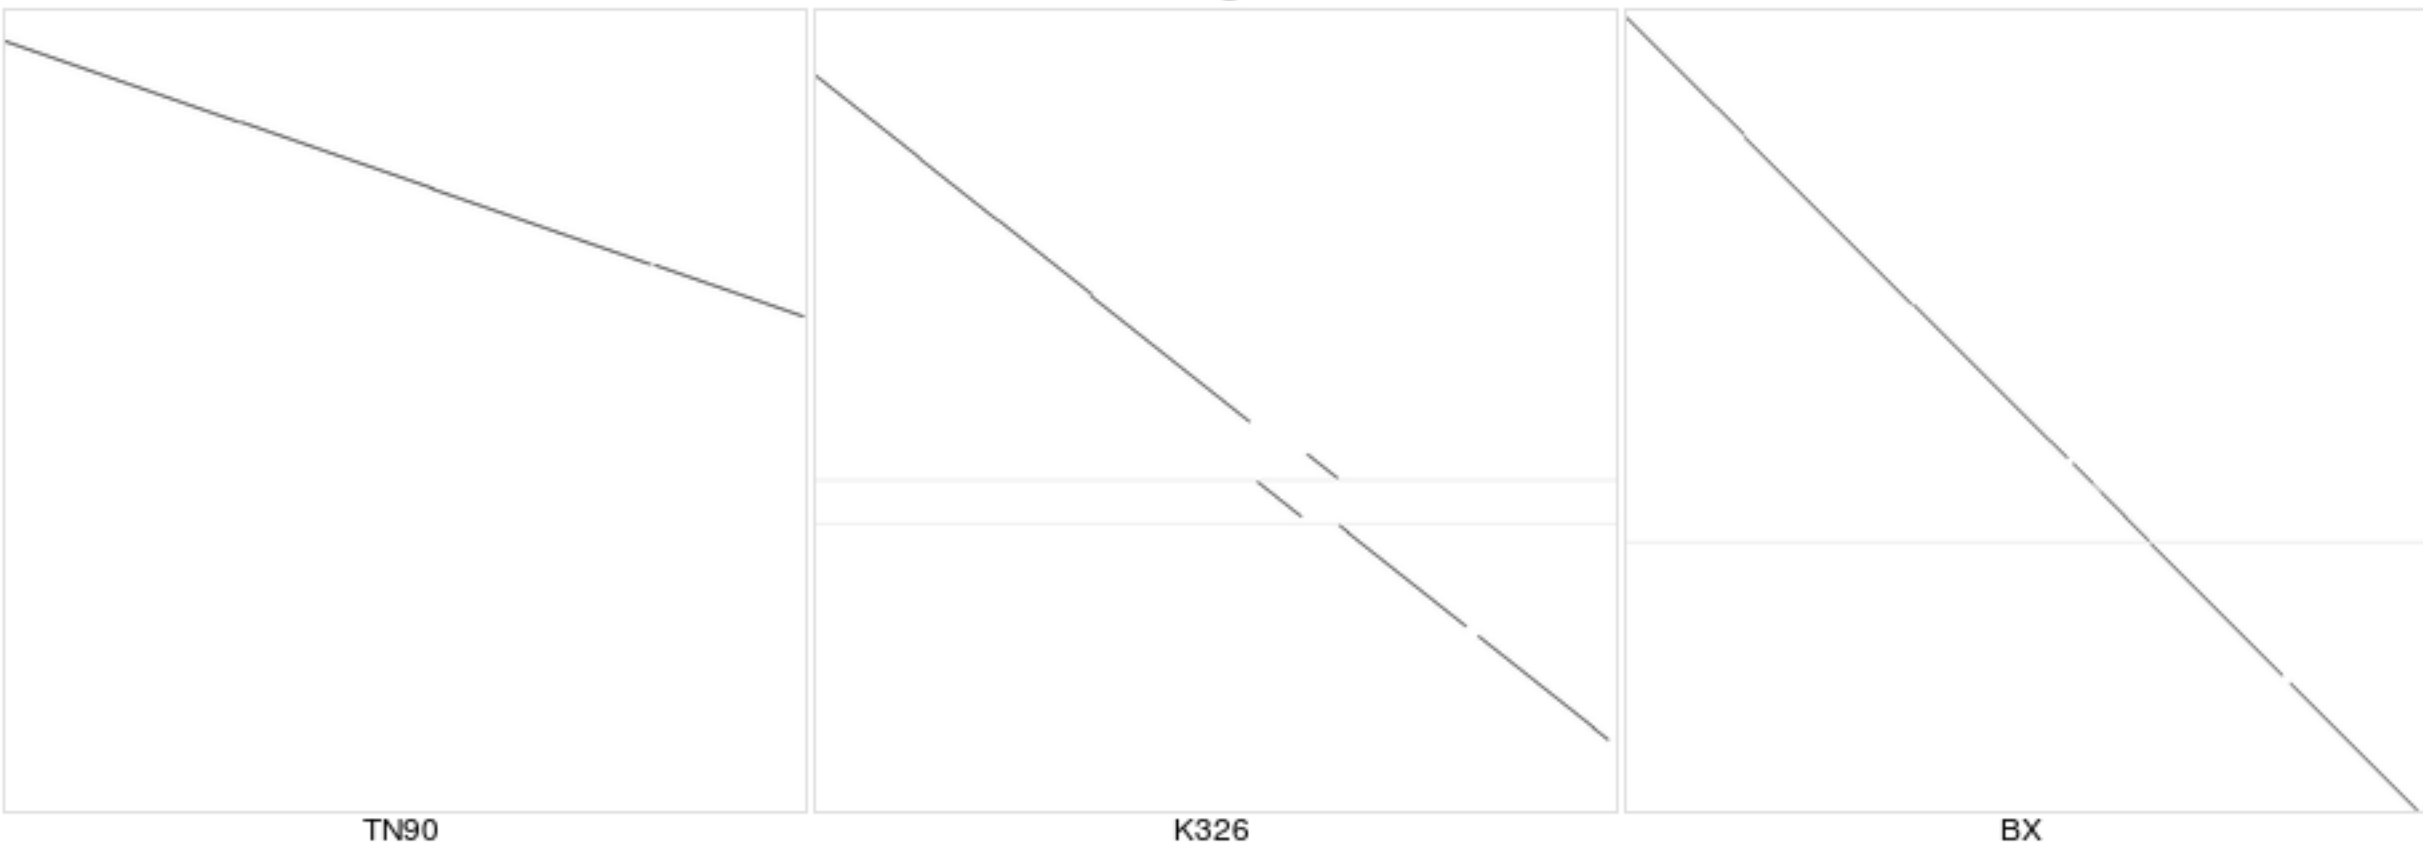

# BAC 3

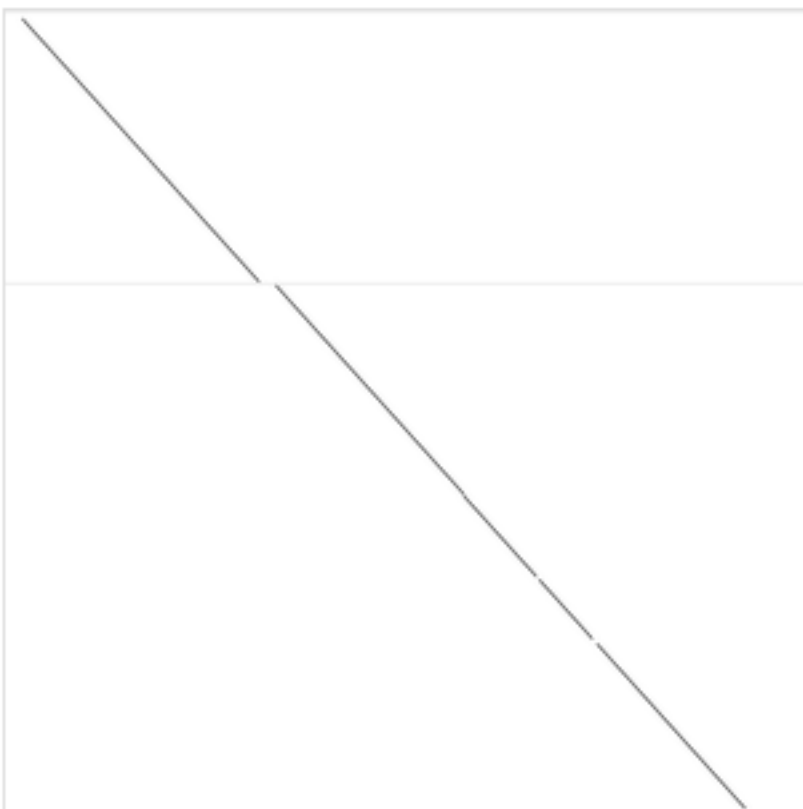

TN90

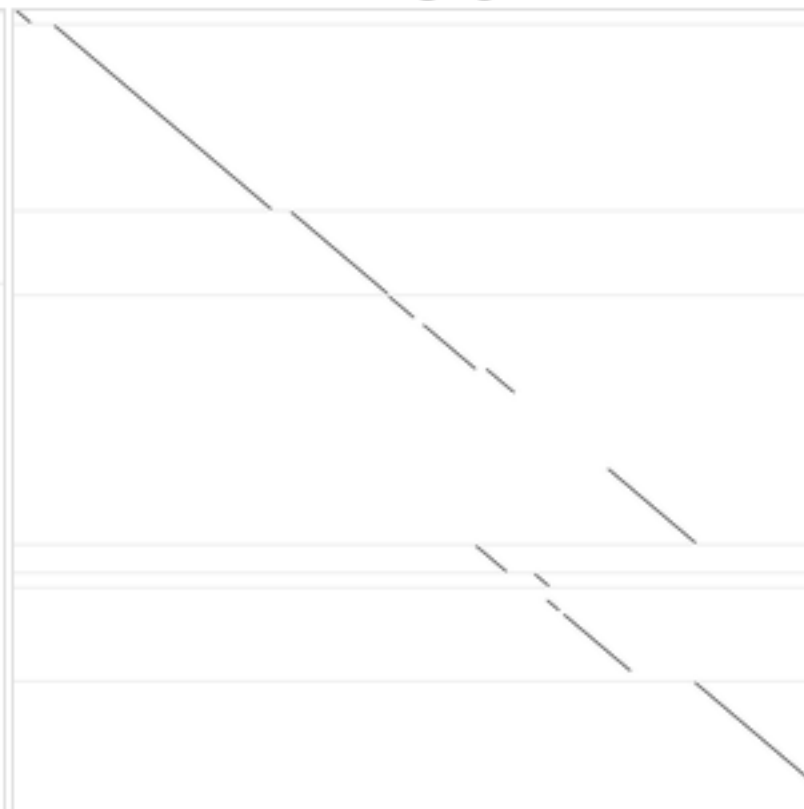

K326

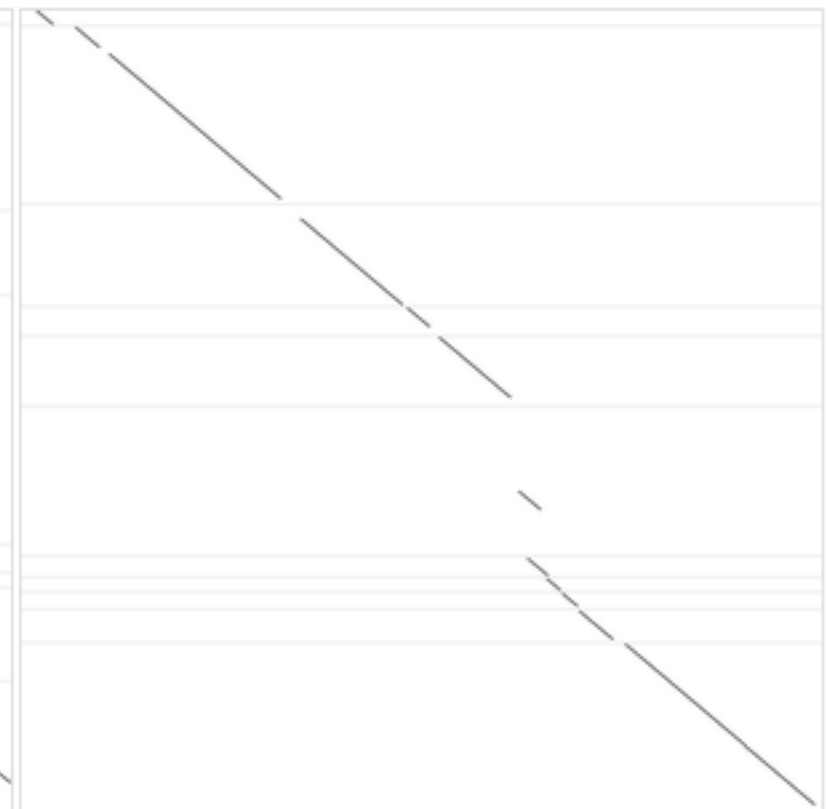

BX

# BAC 4

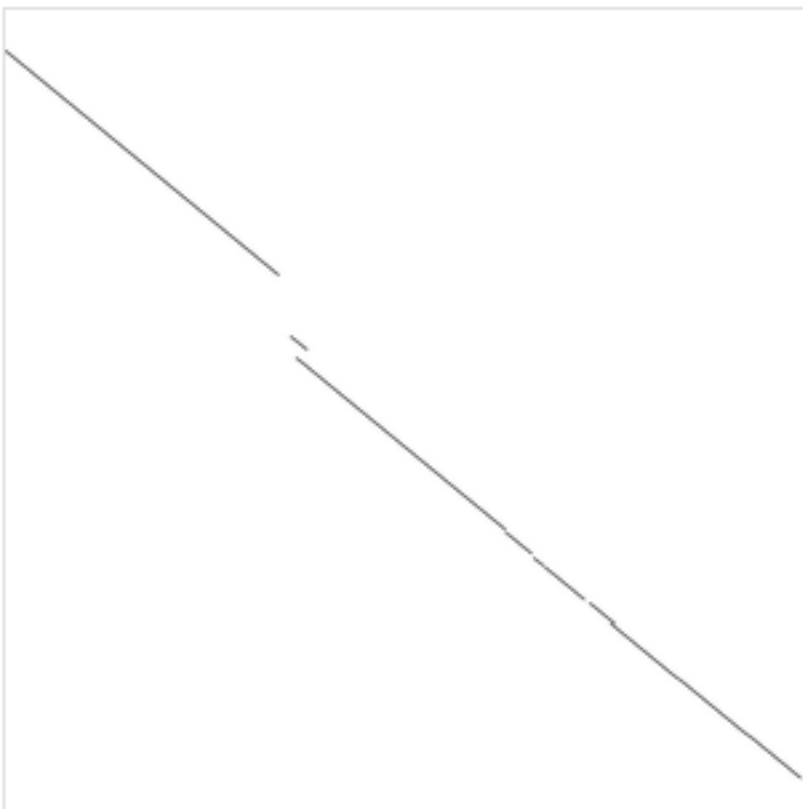

TN90

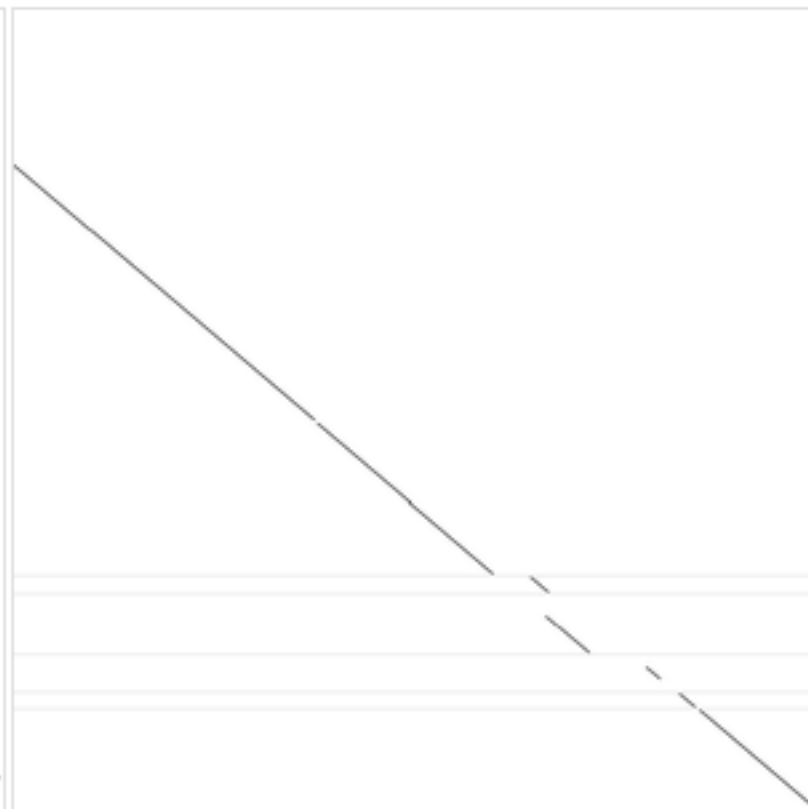

K326

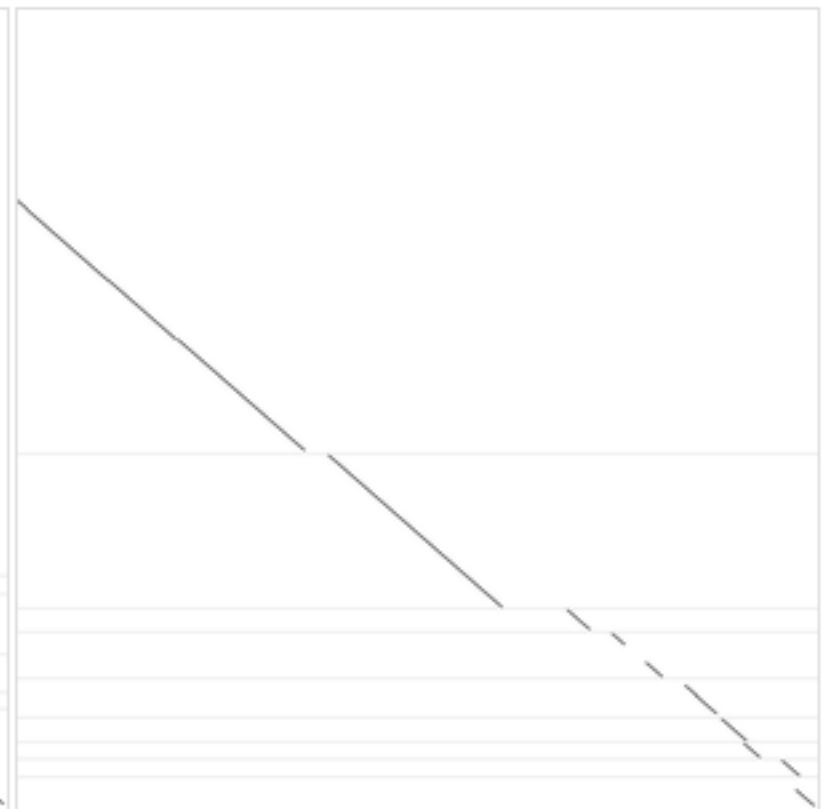

BX

# BAC 5

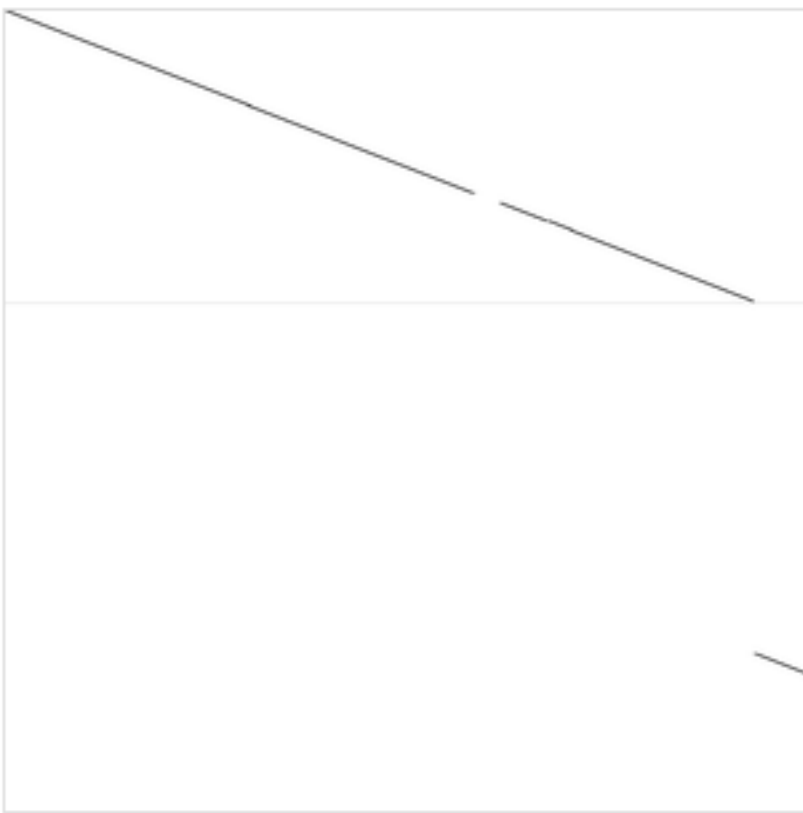

TN90

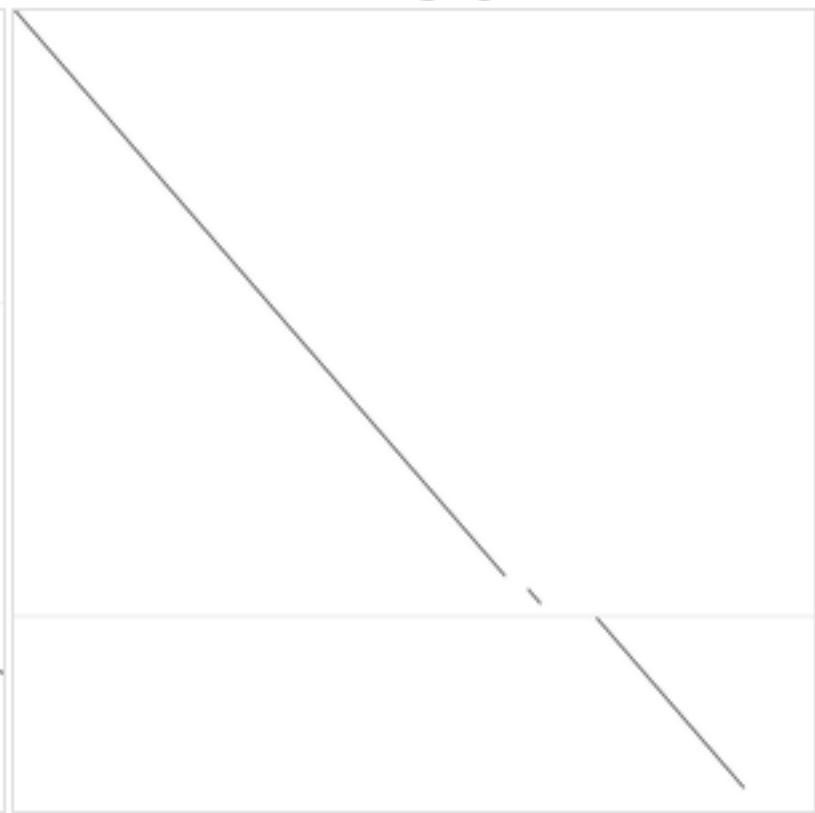

K326

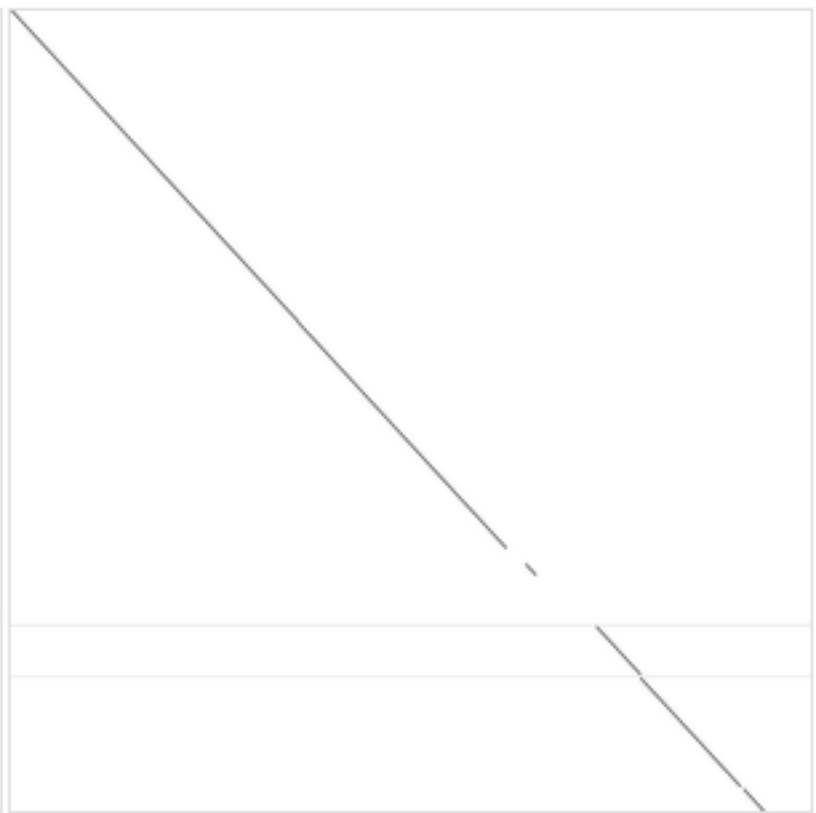

BX

# BAC 6

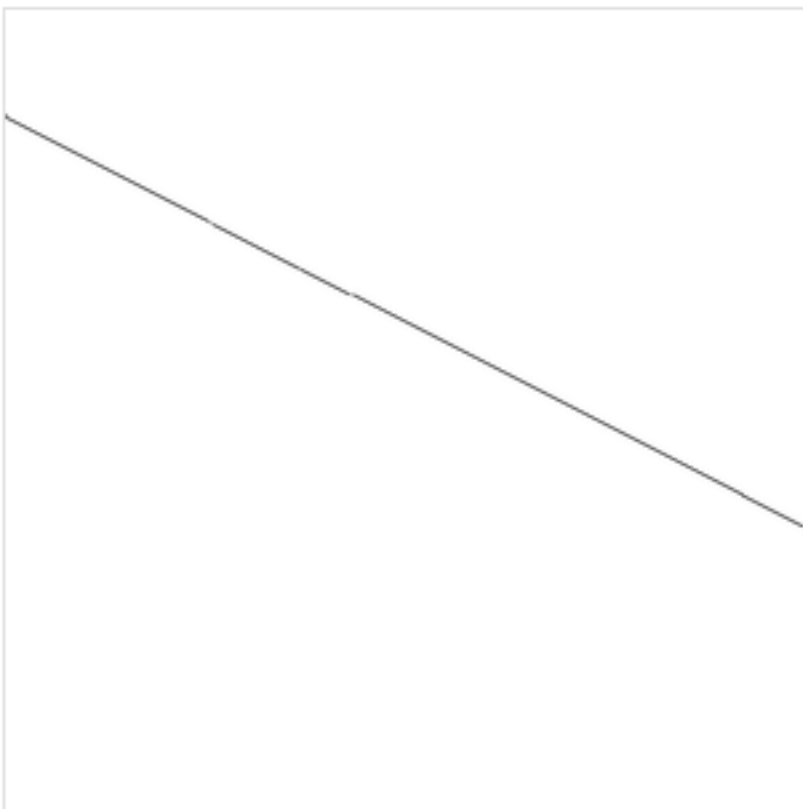

TN90

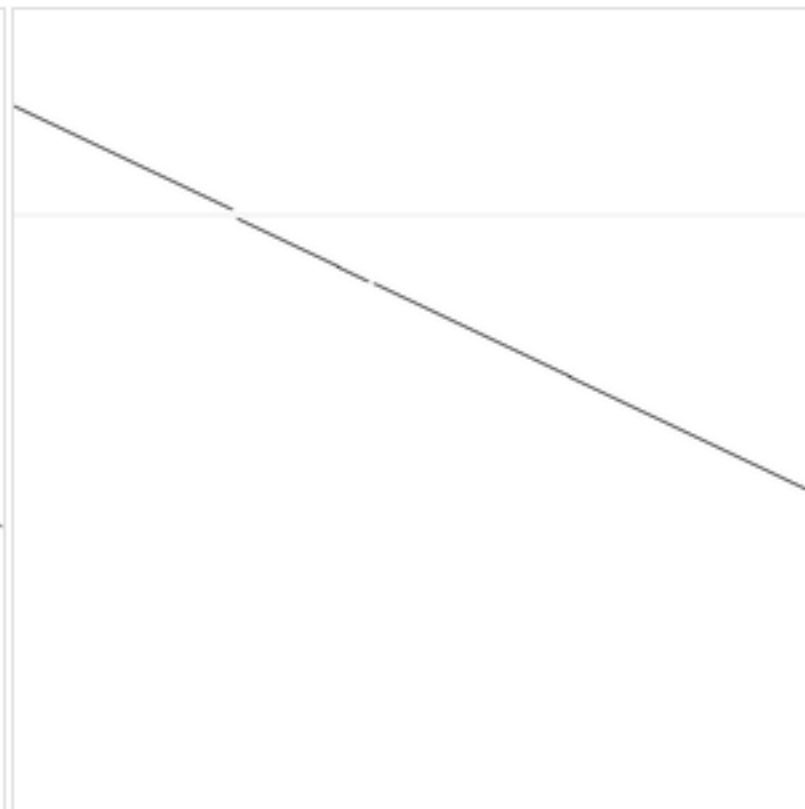

K326

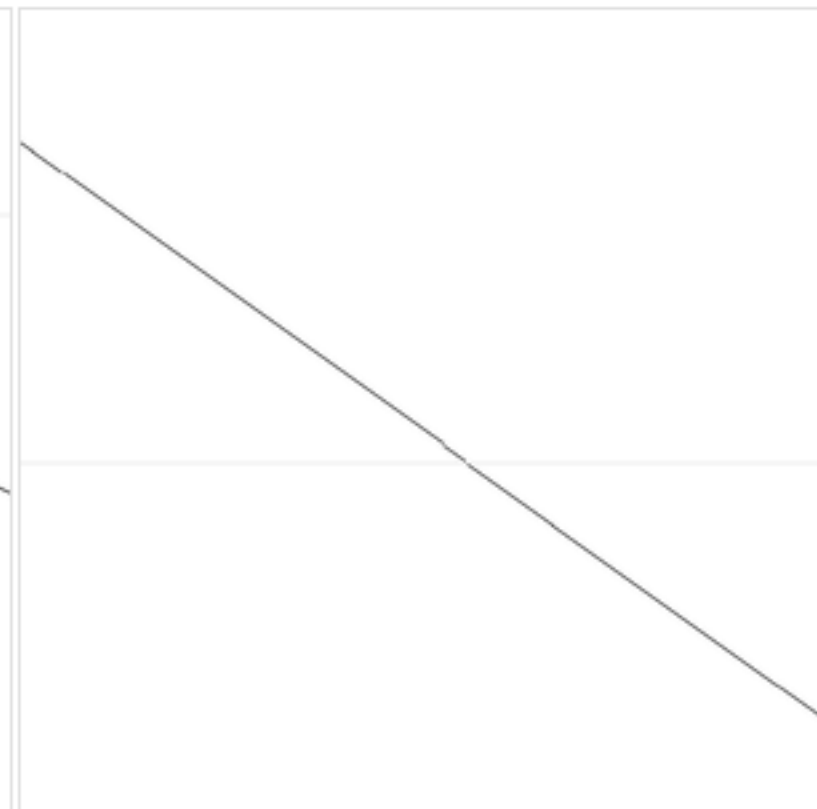

BX

# BAC 7

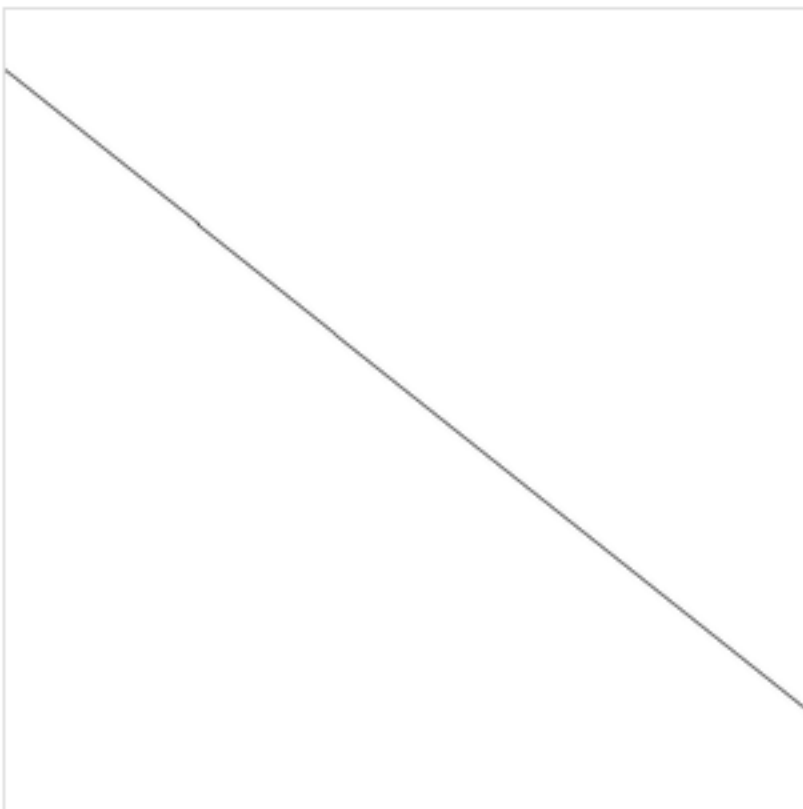

TN90

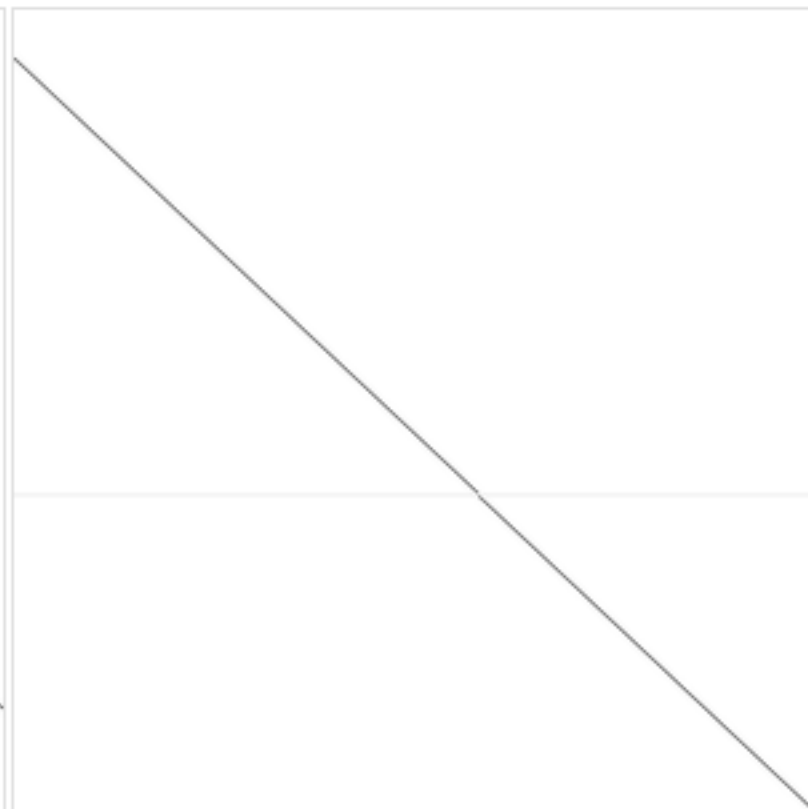

K326

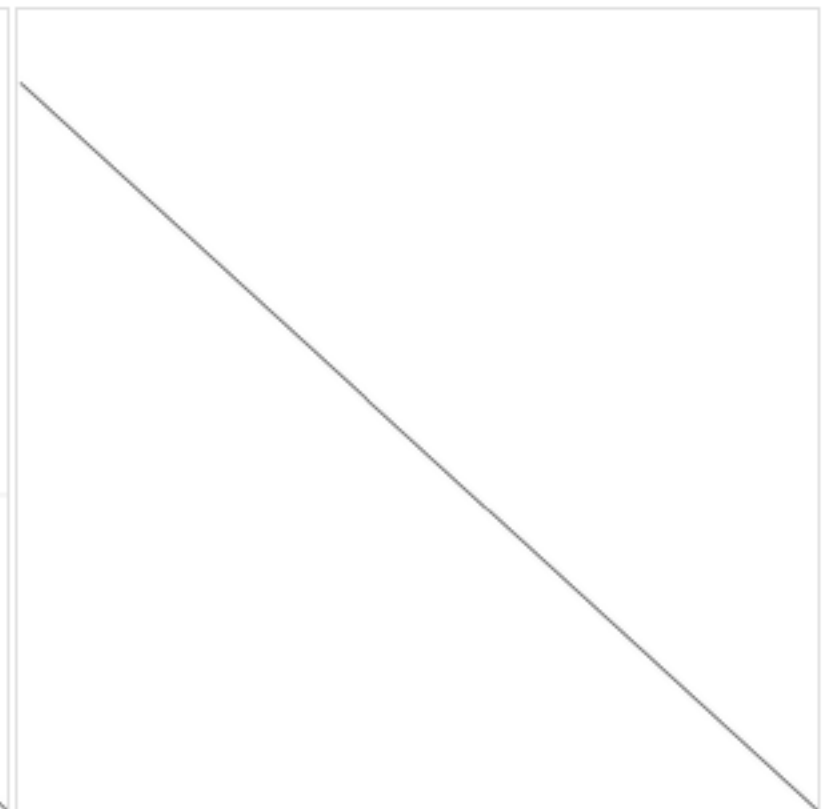

BX

# BAC 8

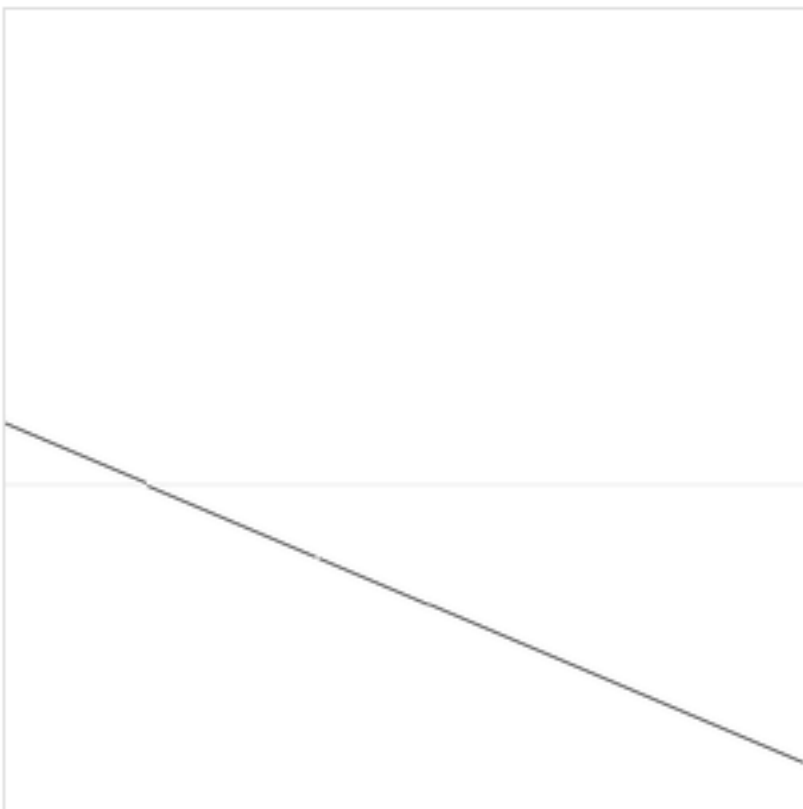

TN90

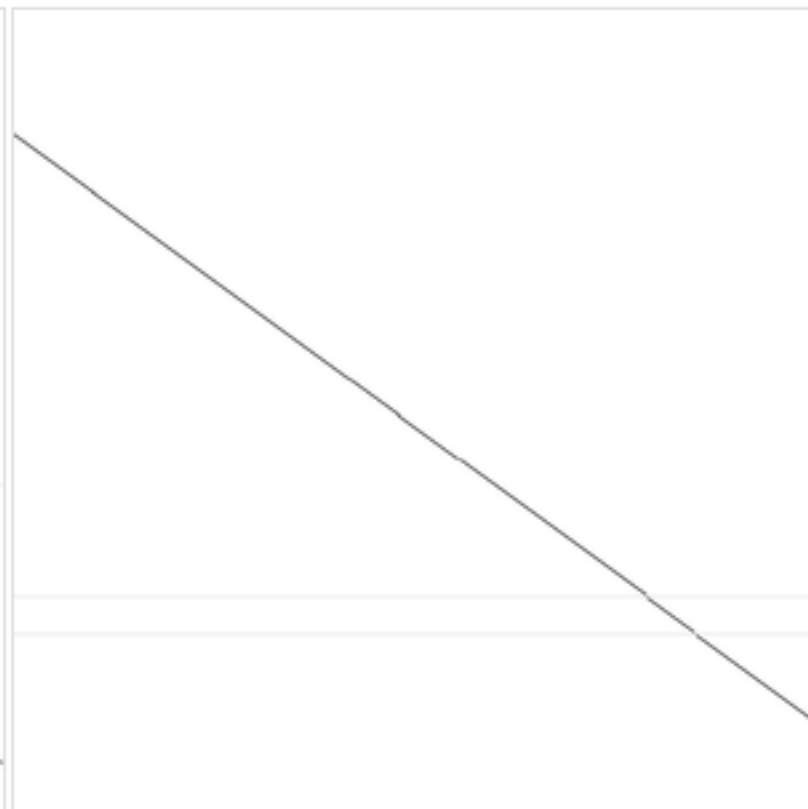

K326

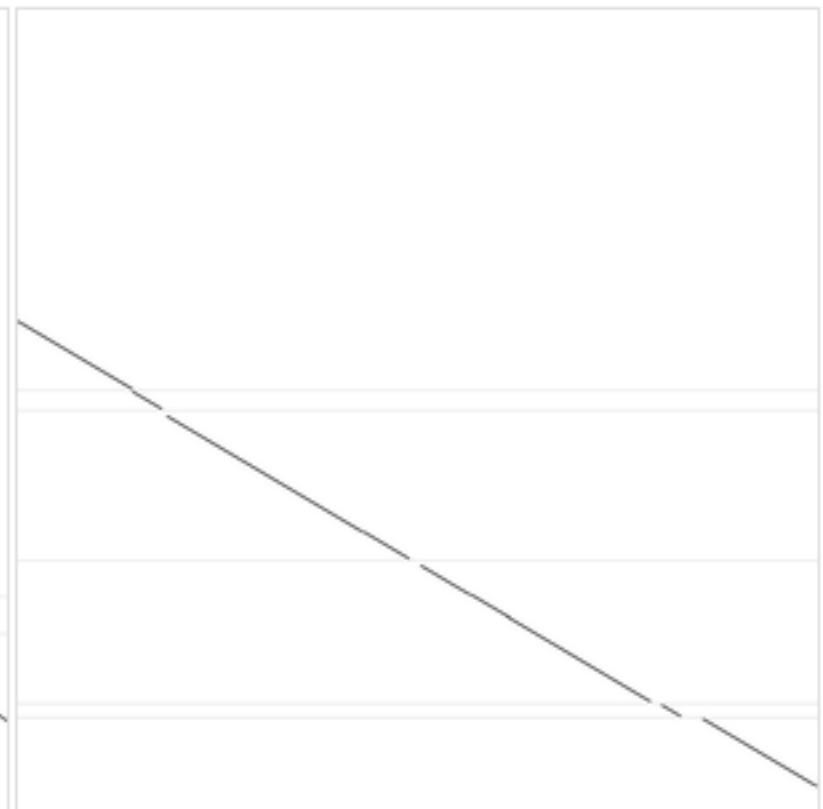

BX



# BAC 9

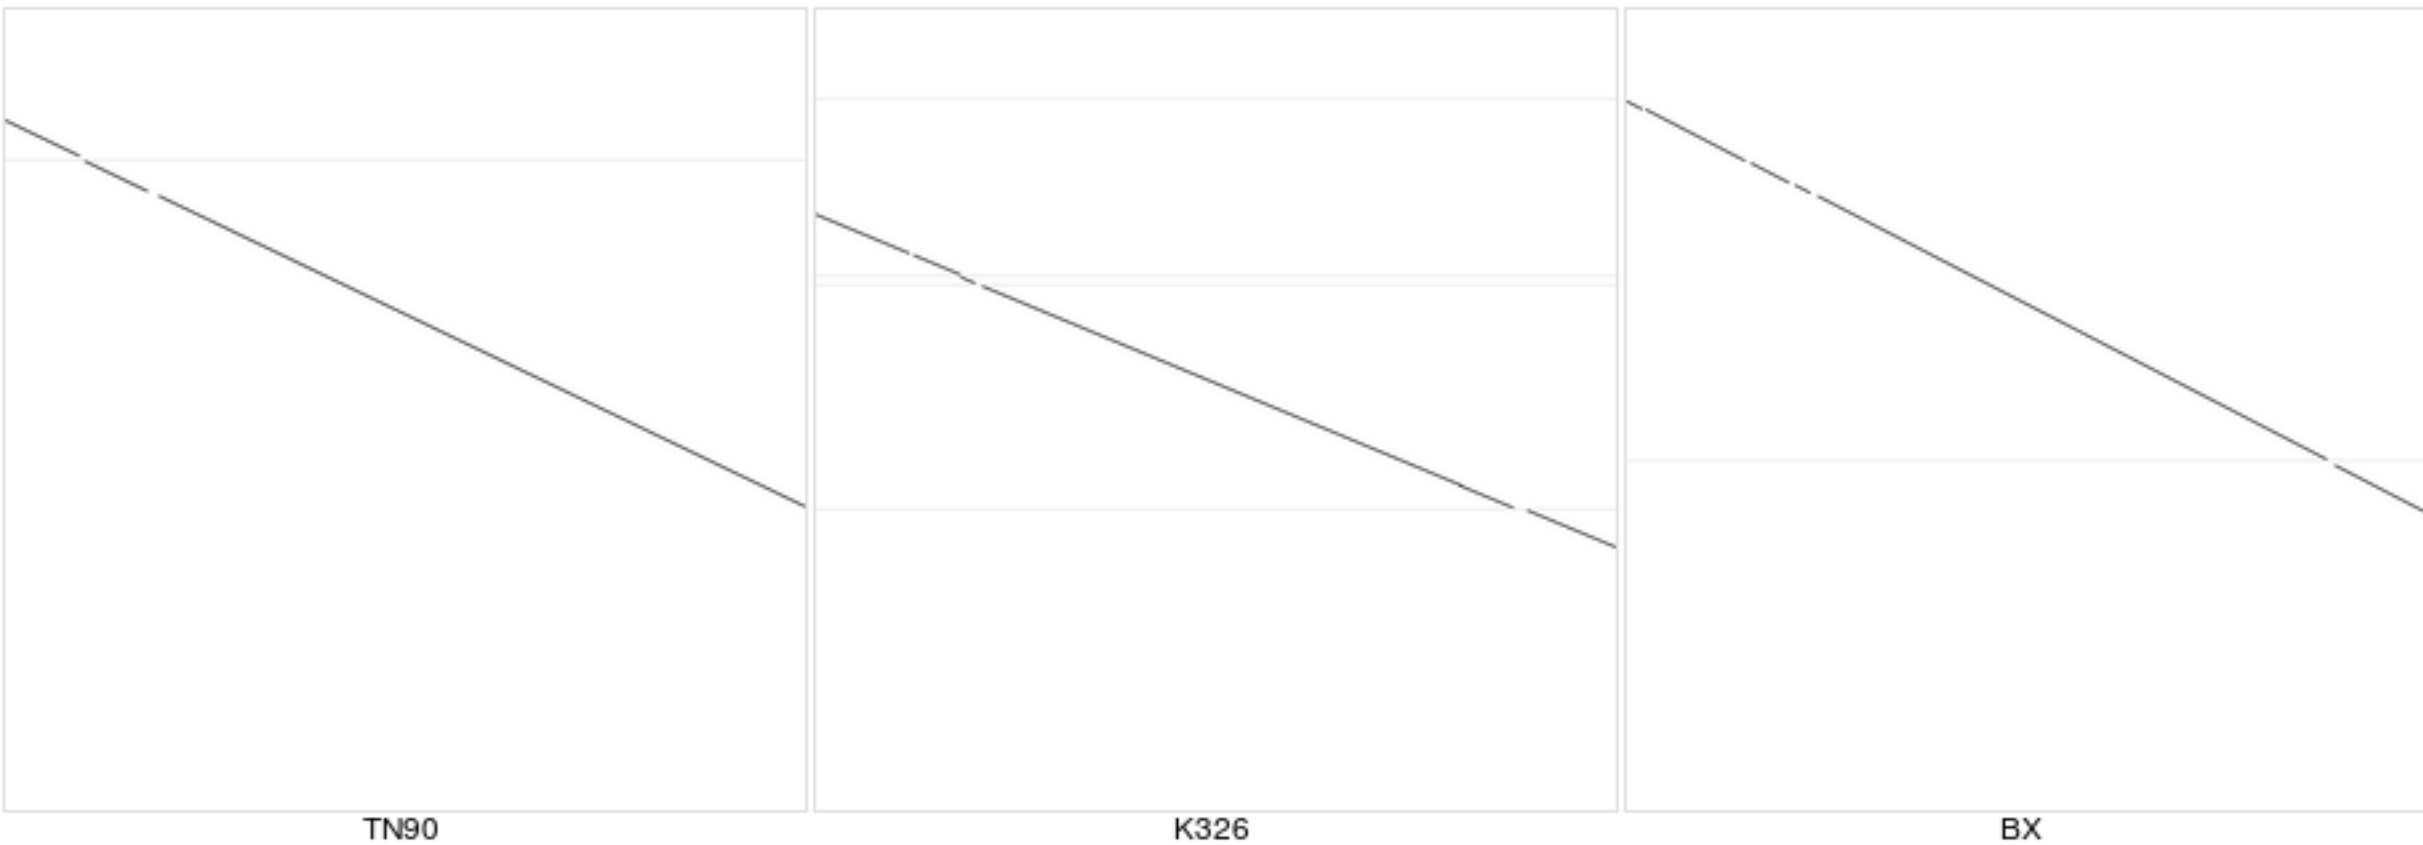

# BAC 10

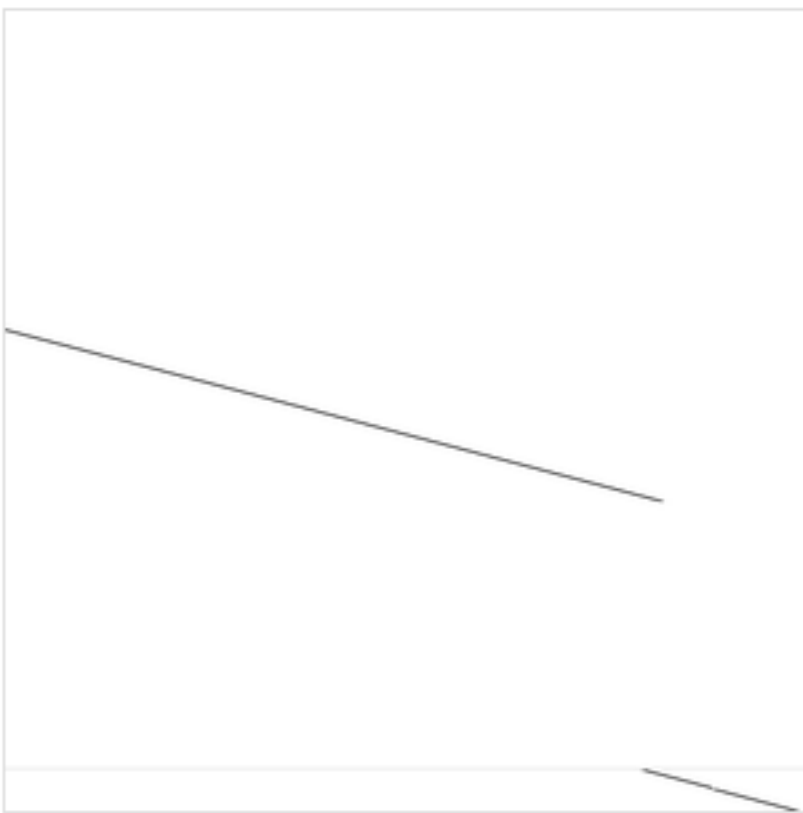

TN90

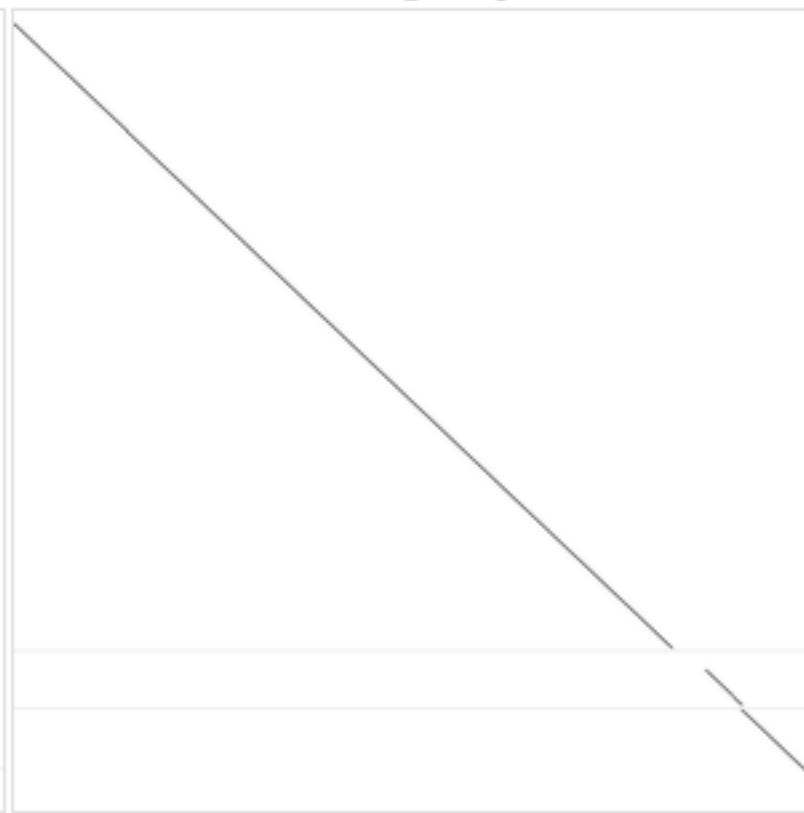

K326

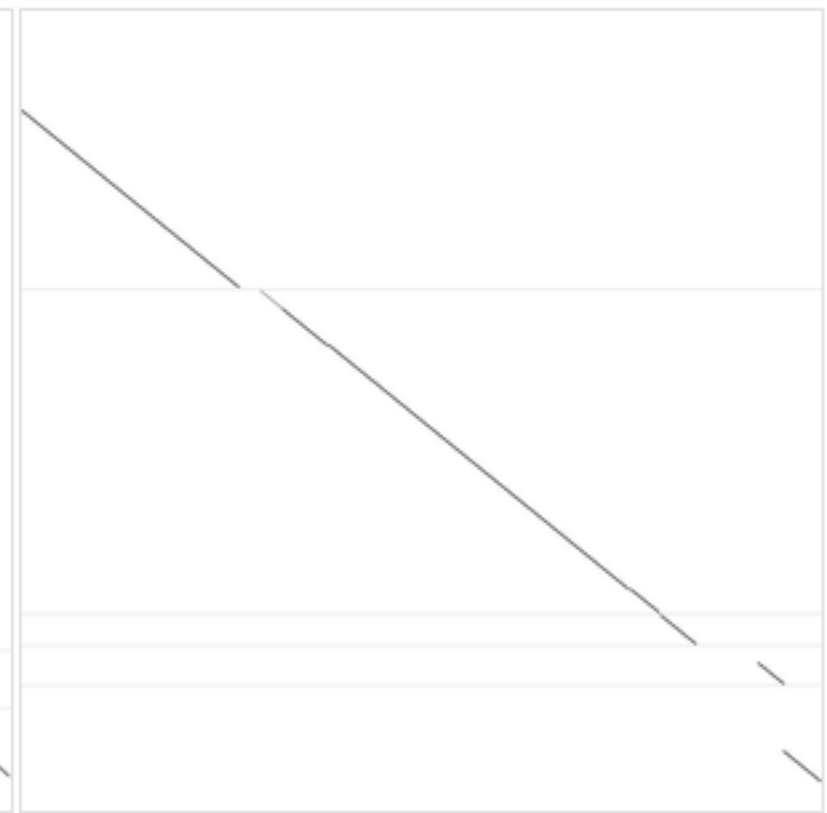

BX

# BAC 11

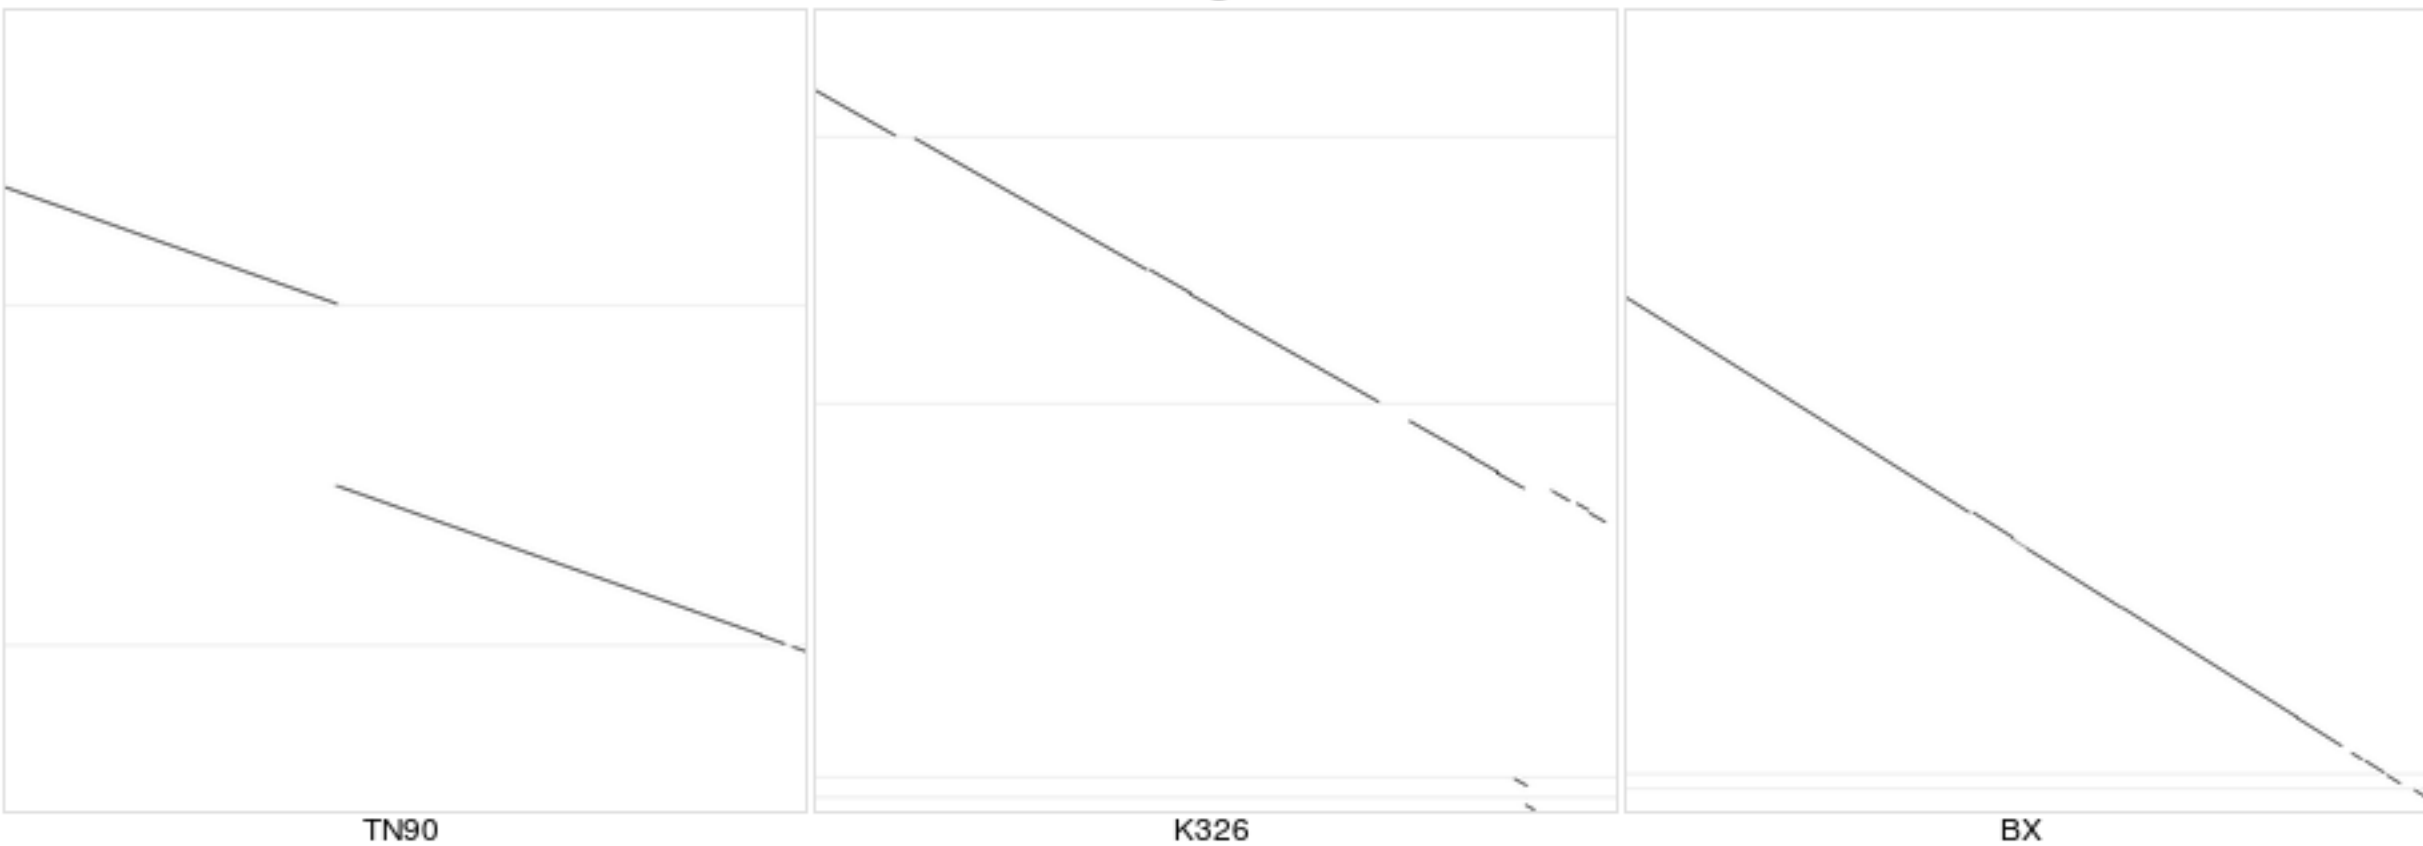

# BAC 12

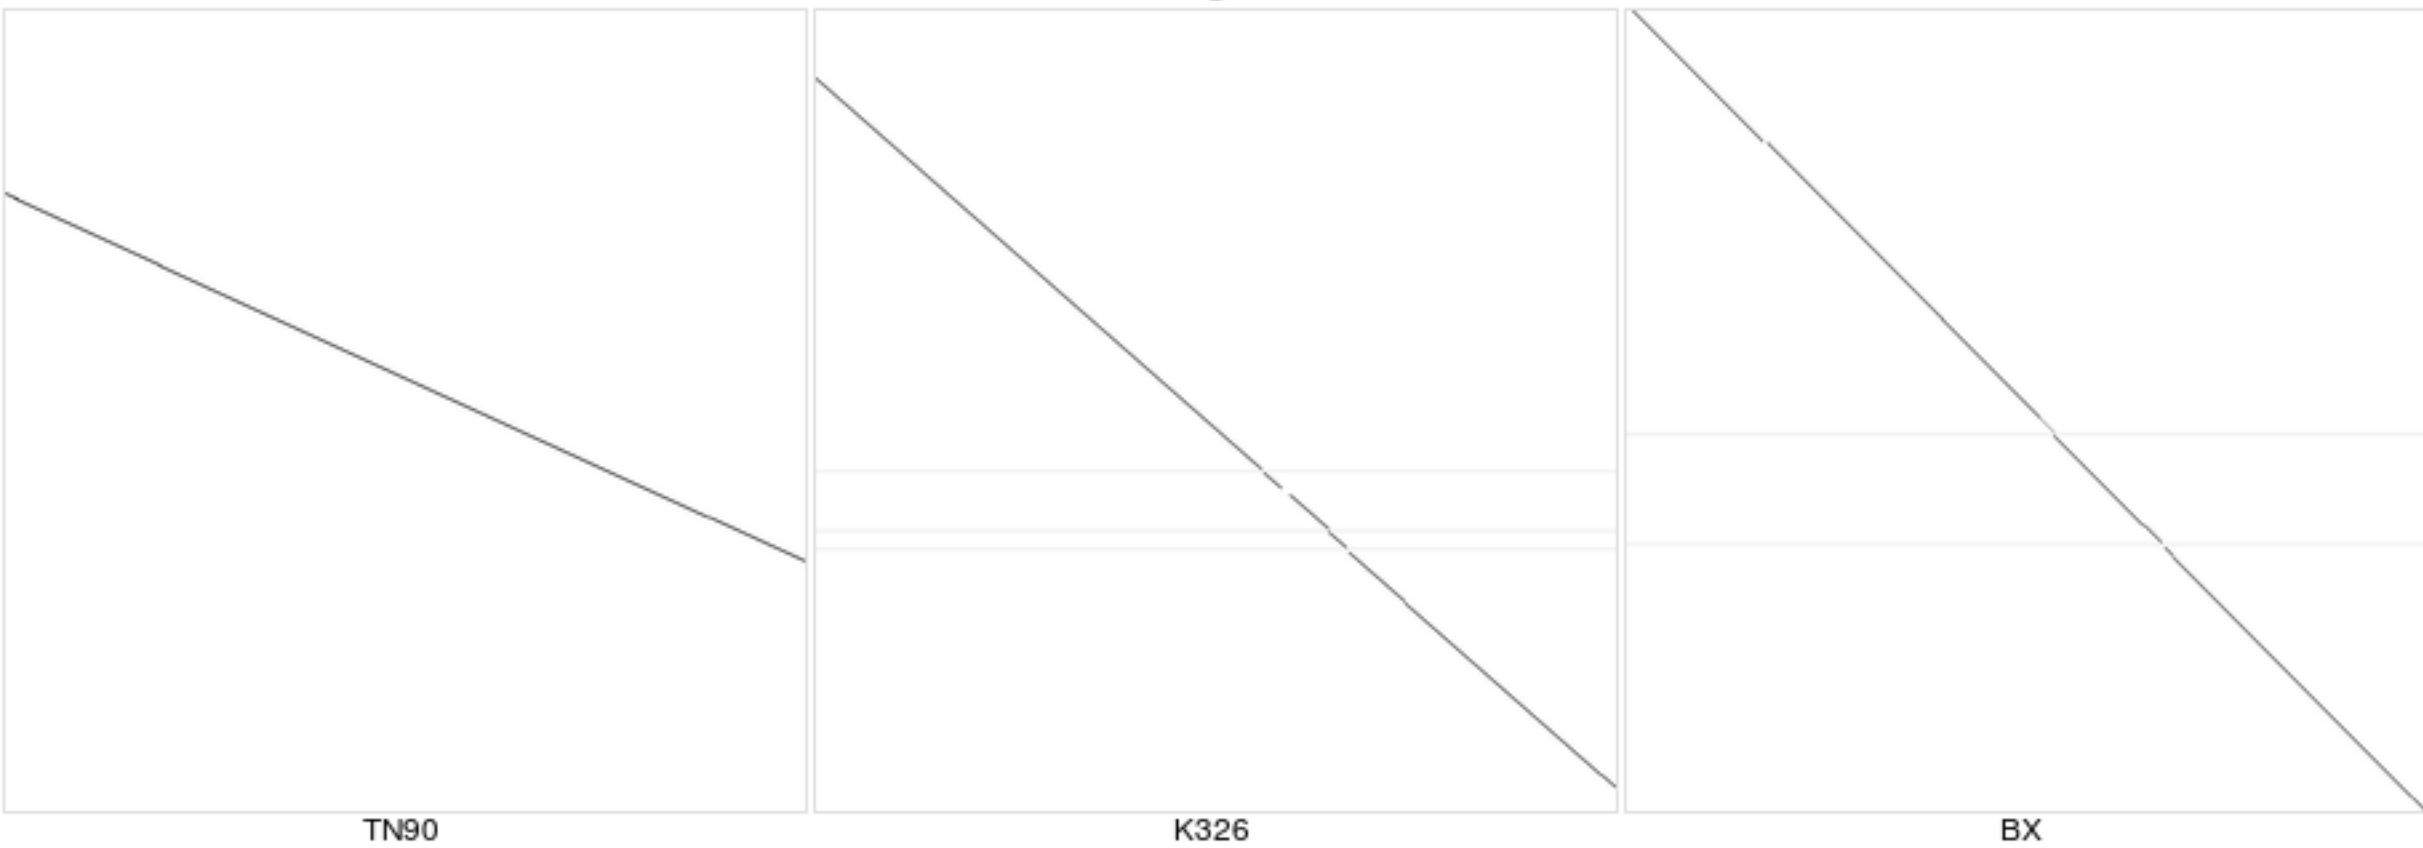

# BAC 13

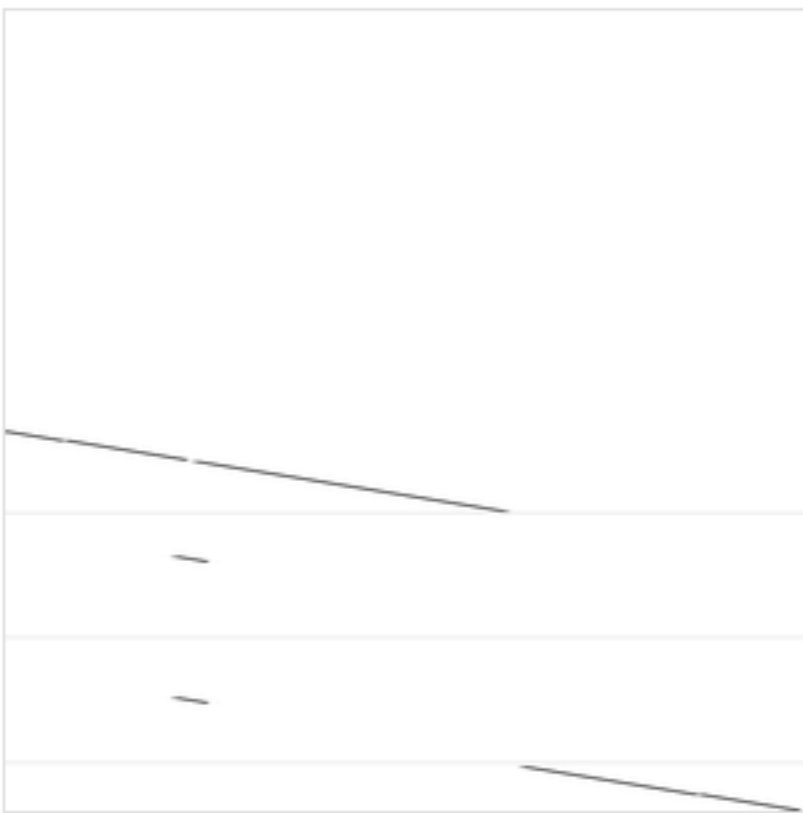

TN90

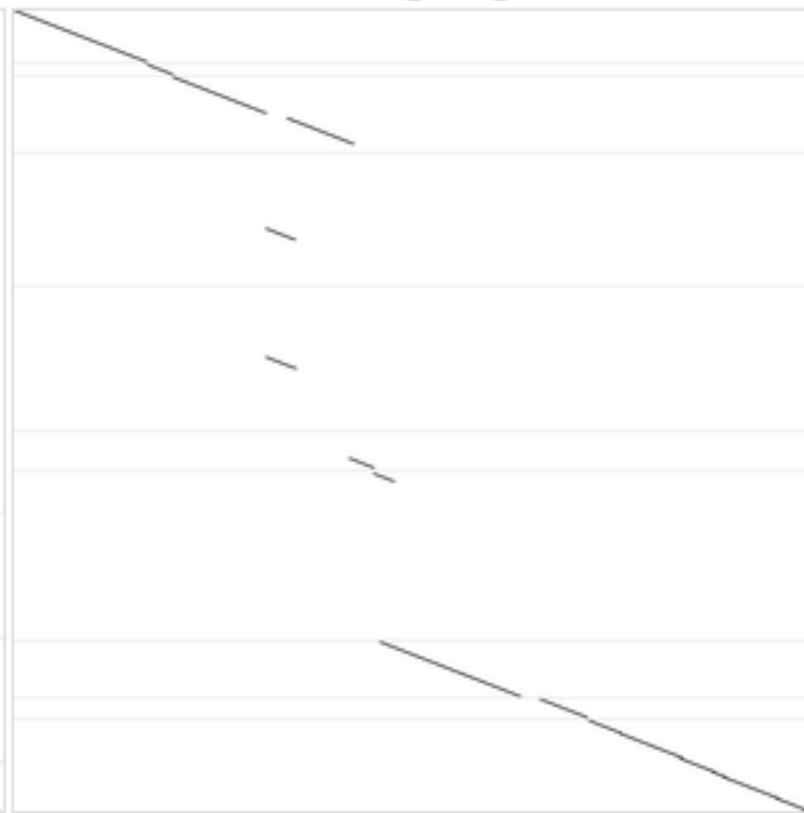

K326

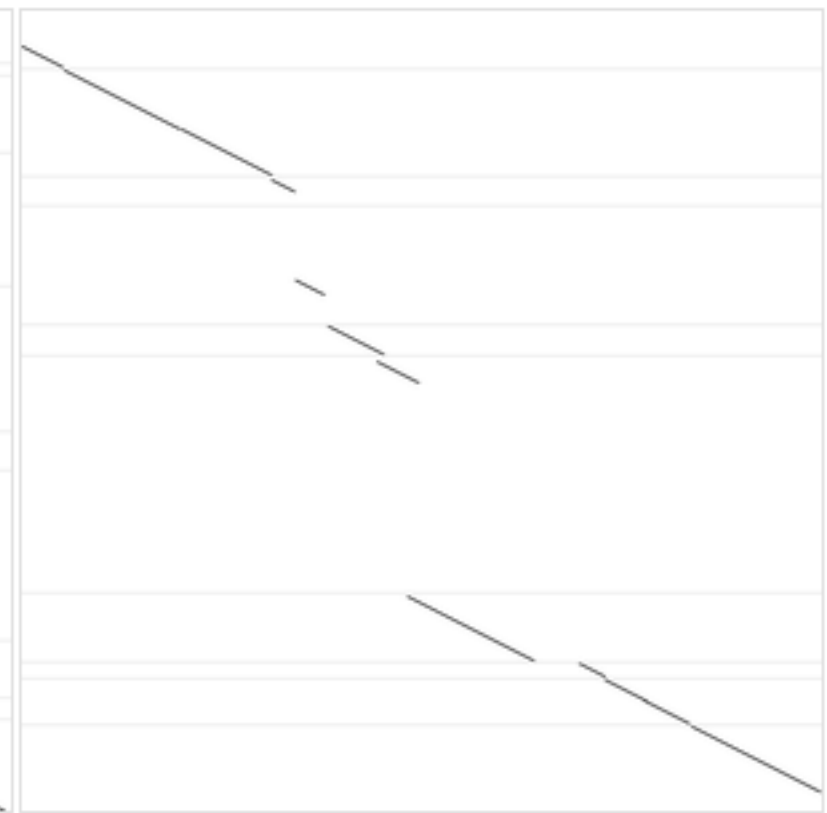

BX

# BAC 14

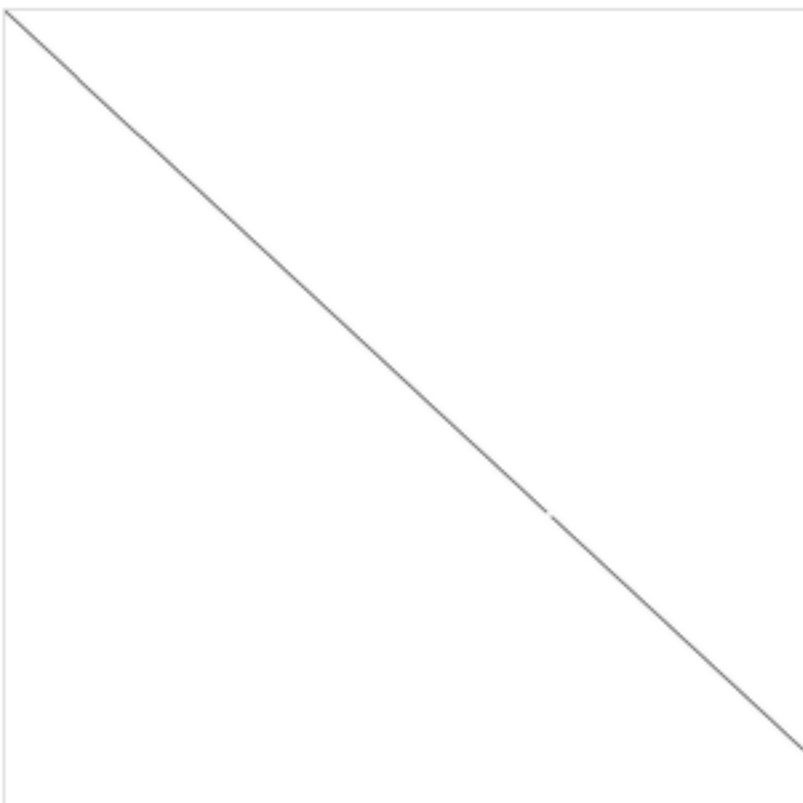

TN90

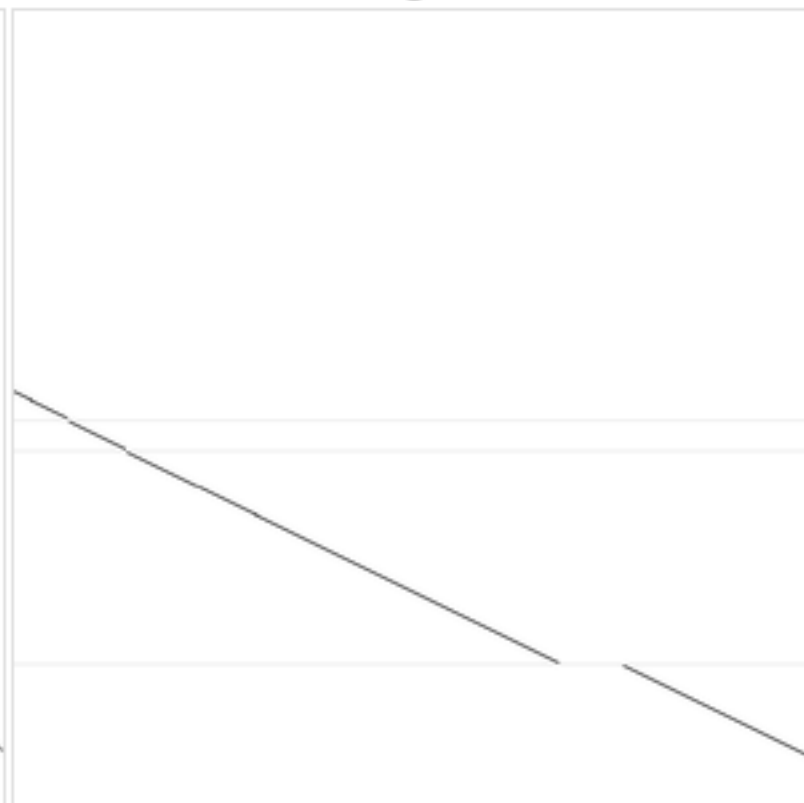

K326

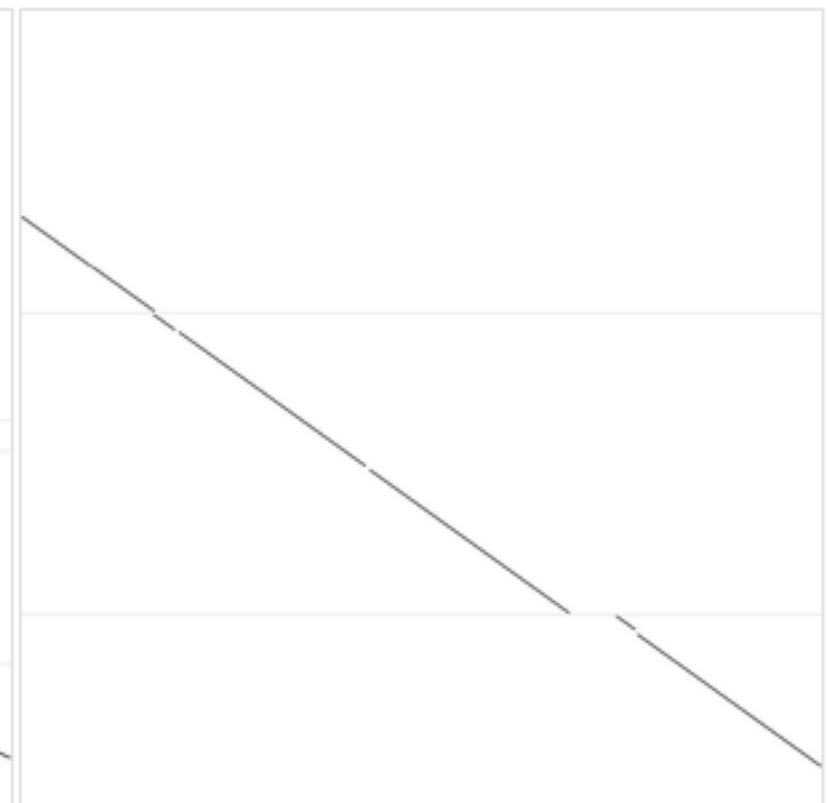

BX

# BAC 15

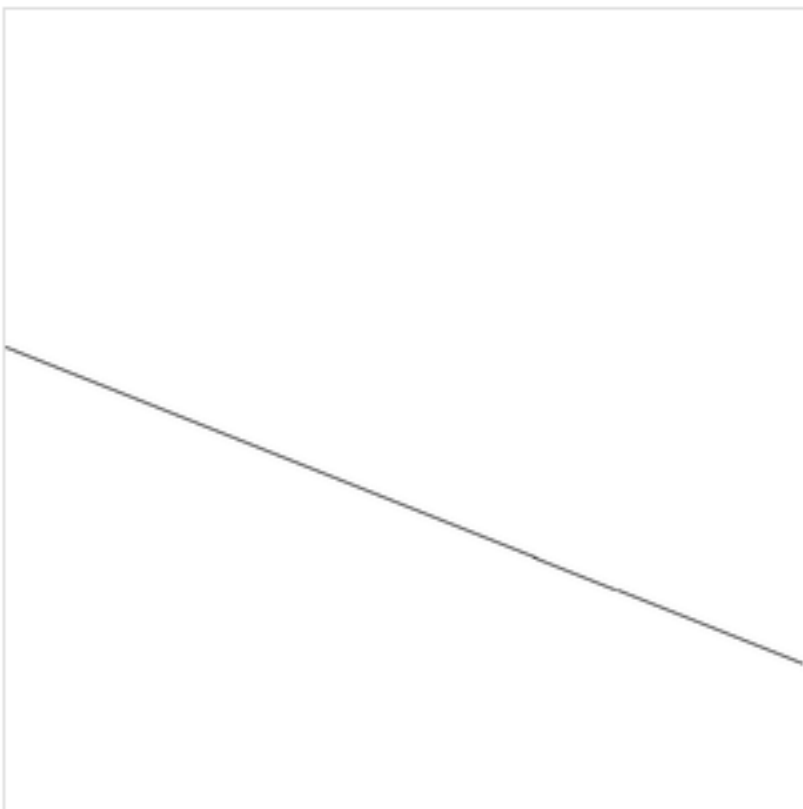

TN90

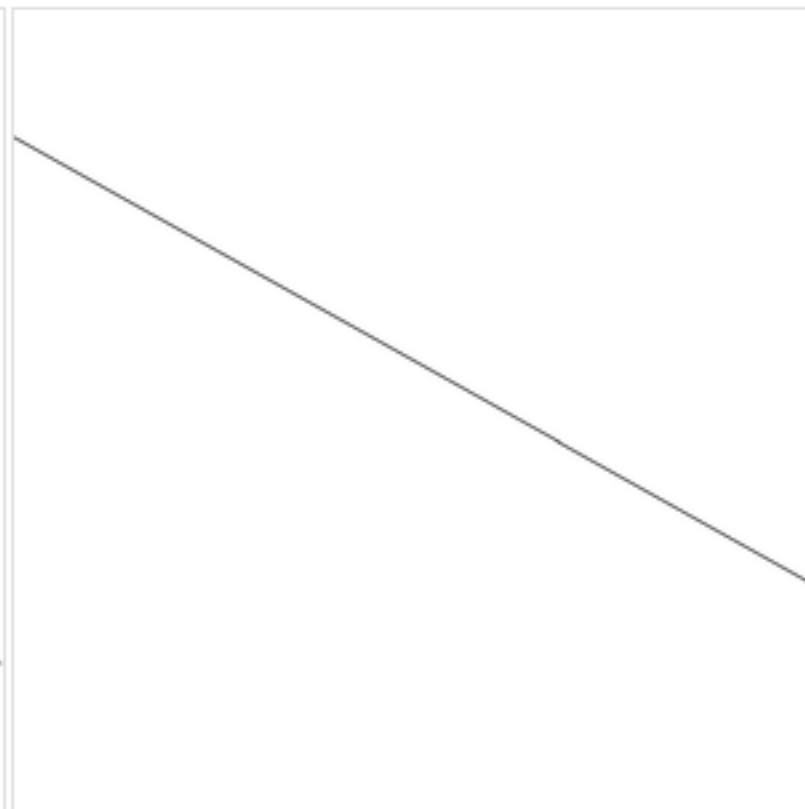

K326

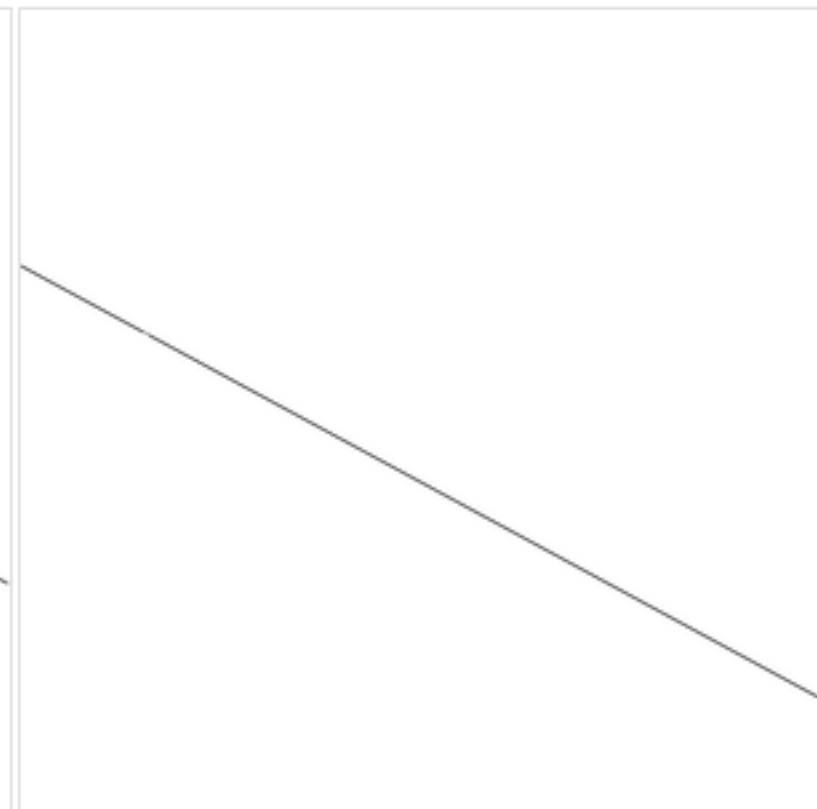

BX

# BAC 16

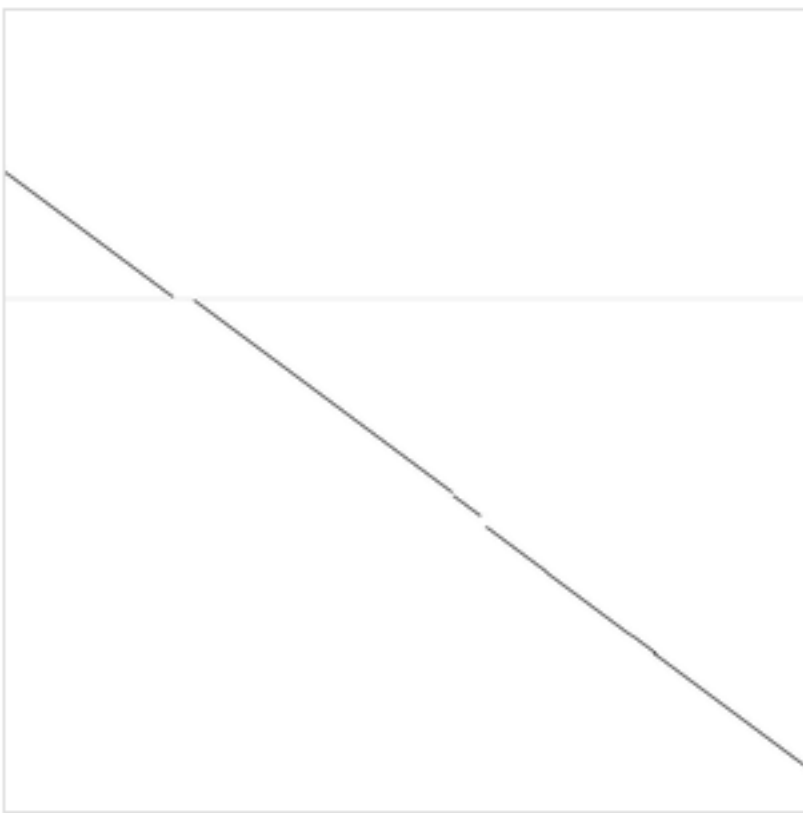

TN90

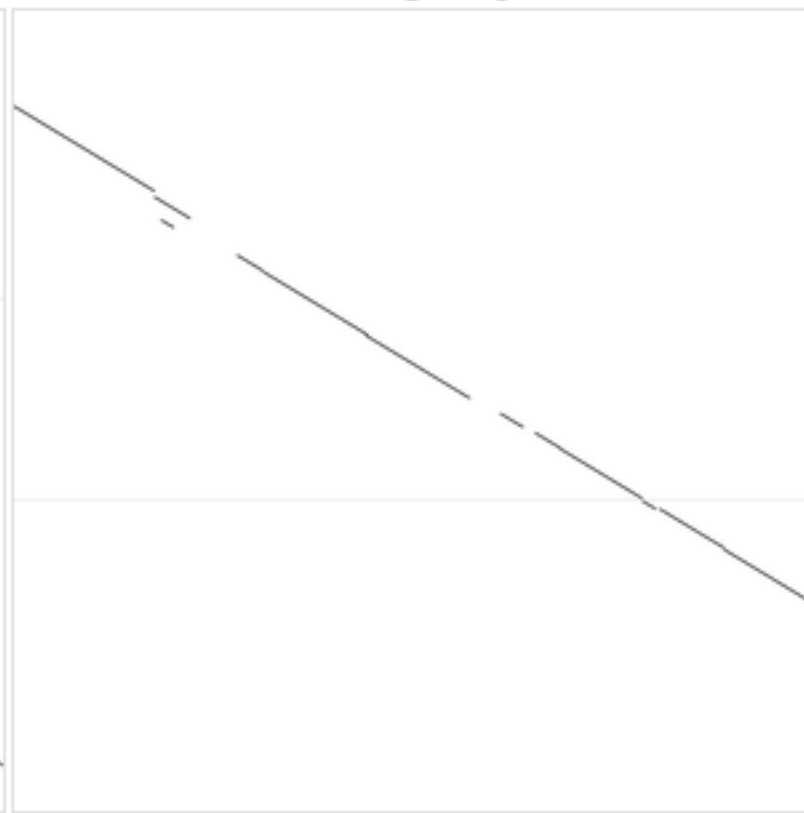

K326

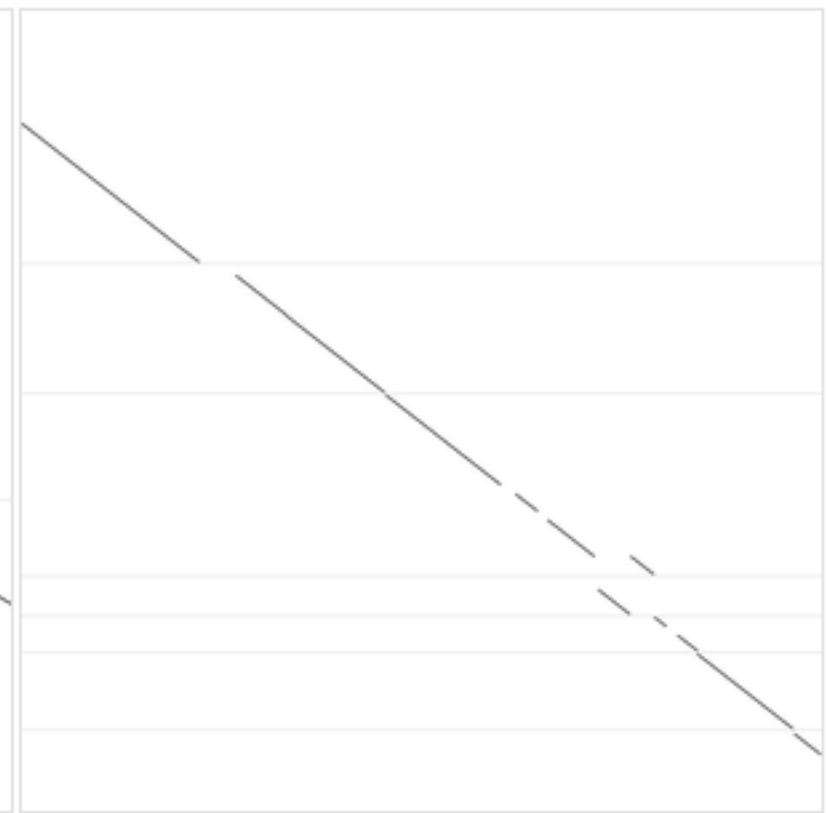

BX



# BAC 17

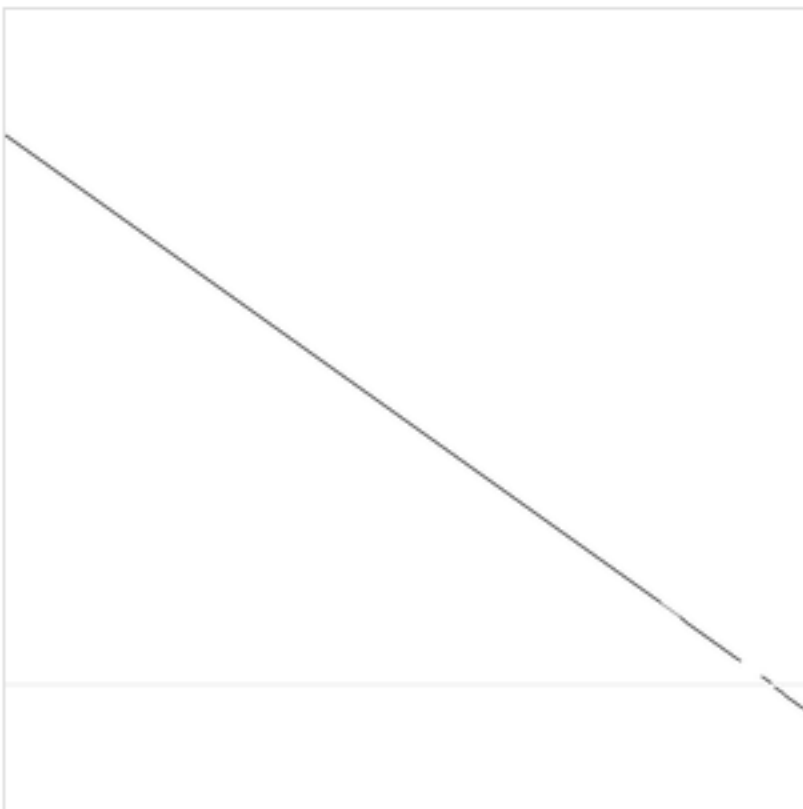

TN90

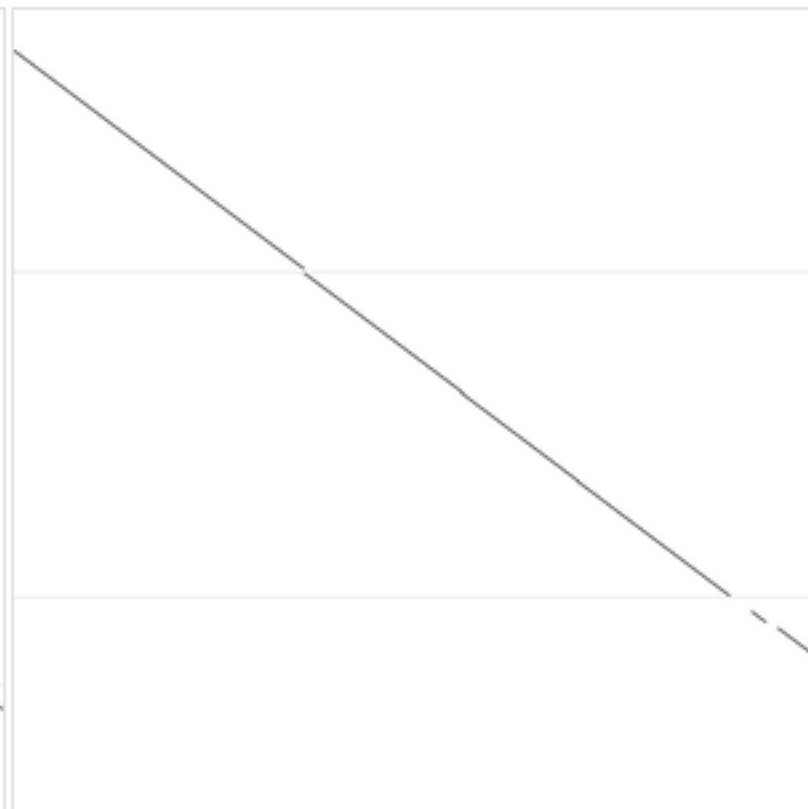

K326

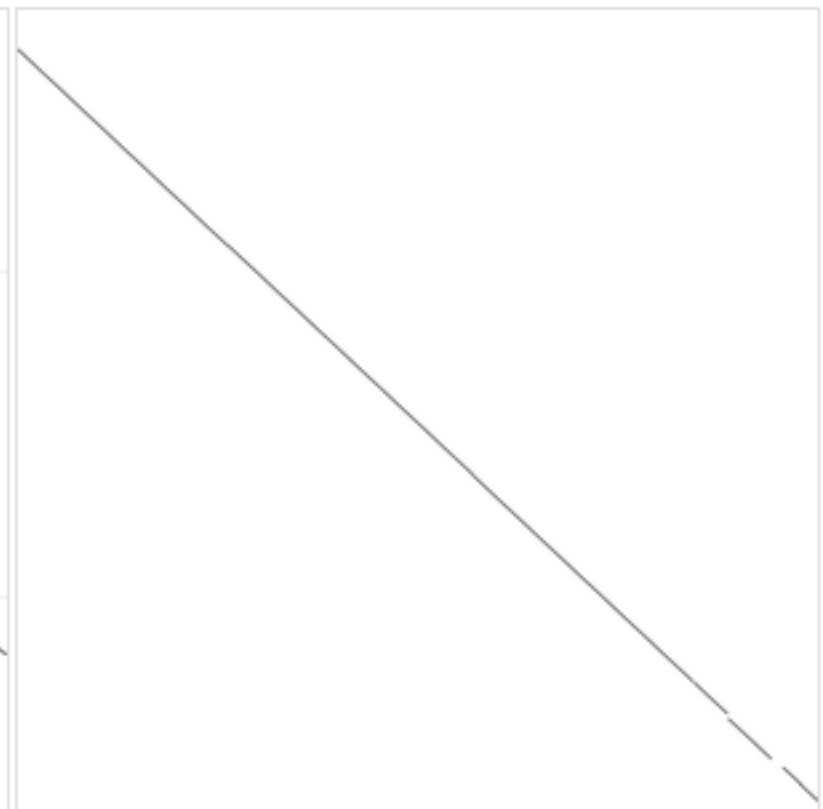

BX

# BAC 18

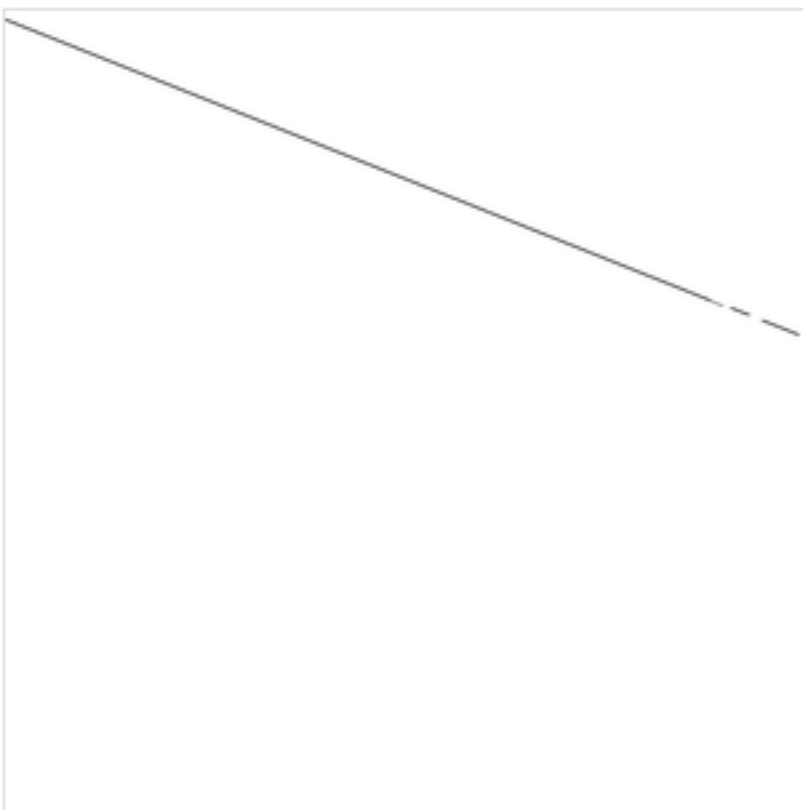

TN90

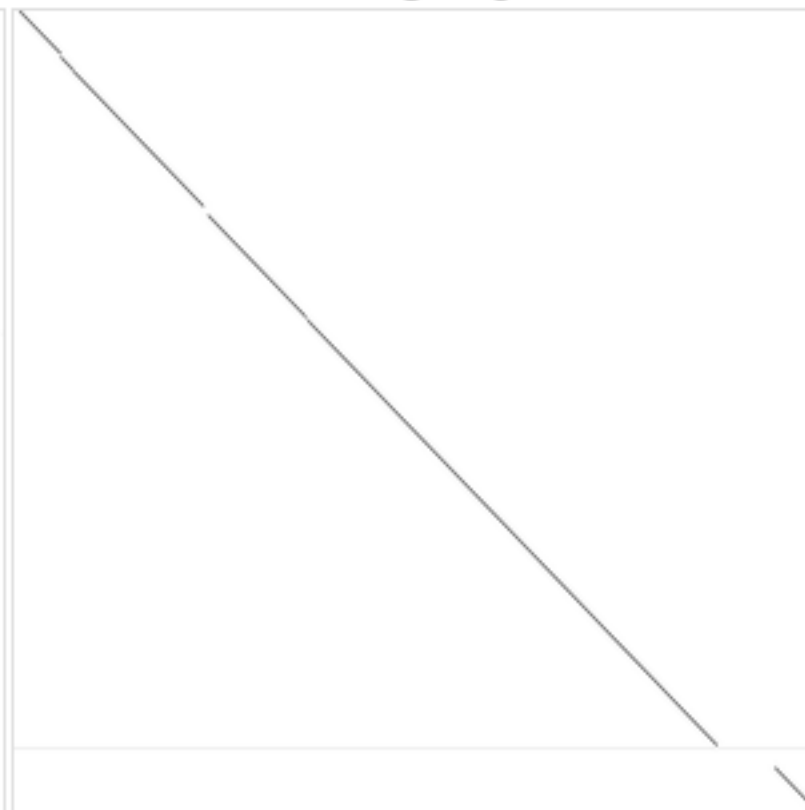

K326

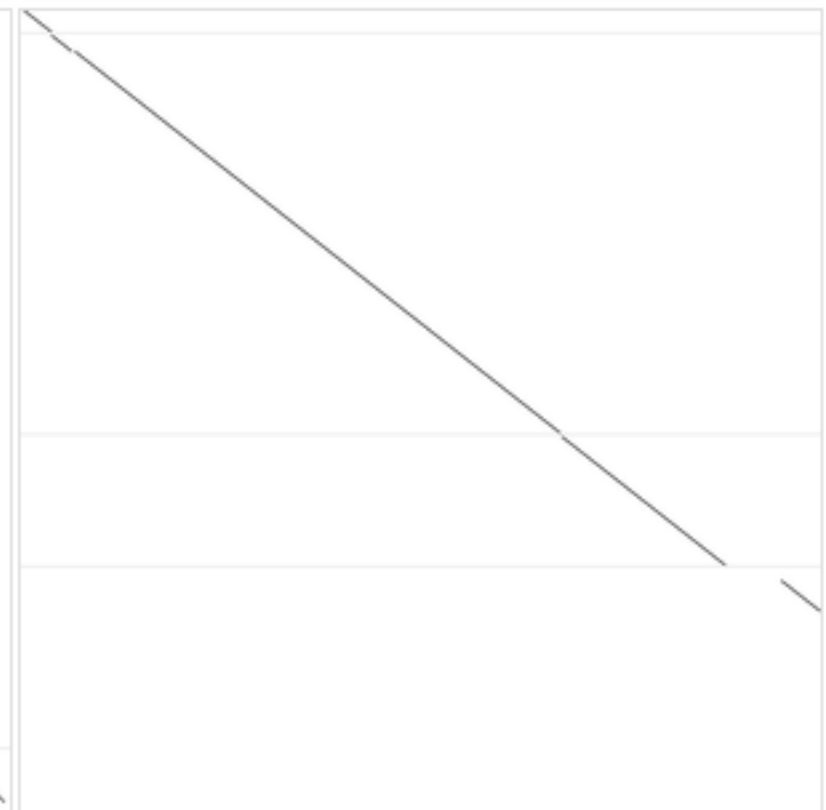

BX

# BAC 19

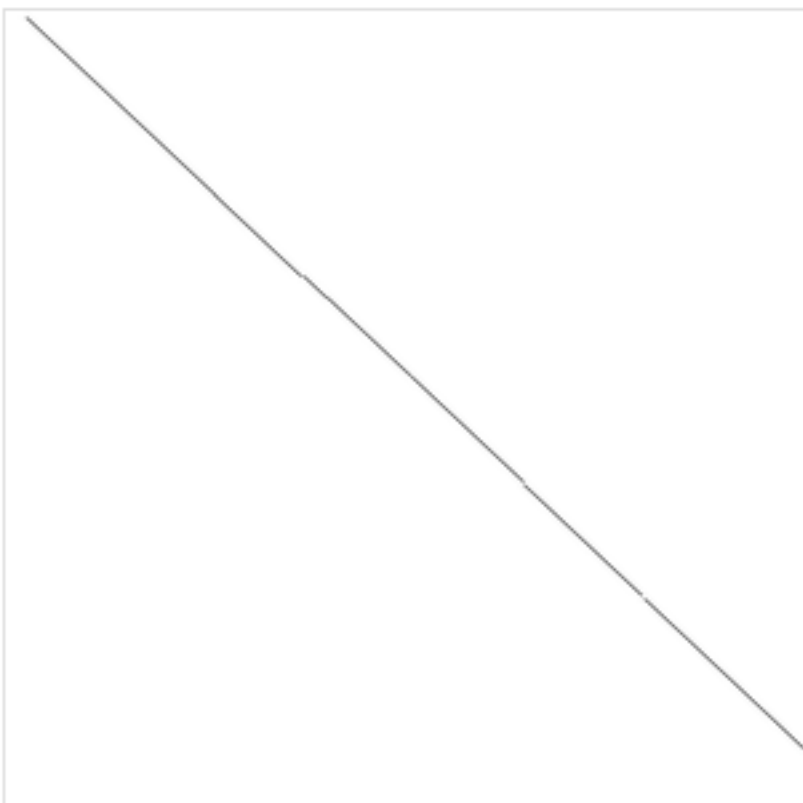

TN90

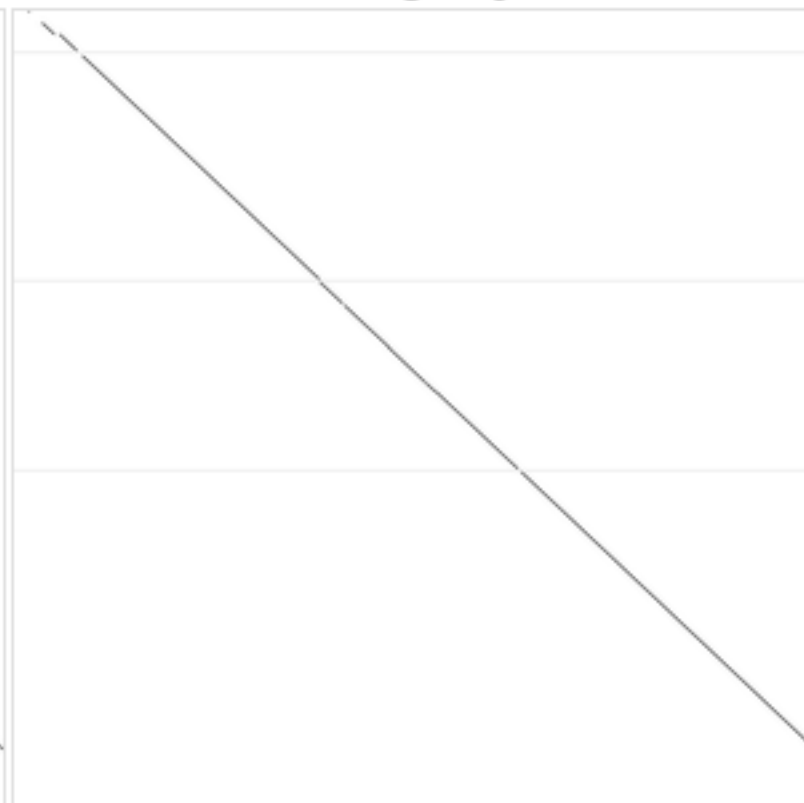

K326

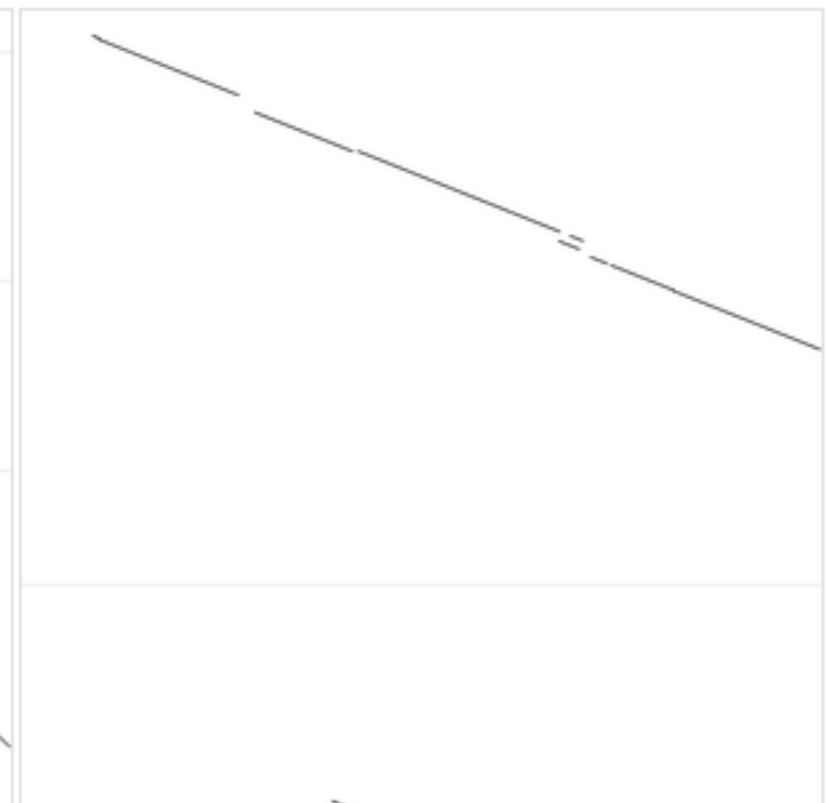

BX

# BAC 20

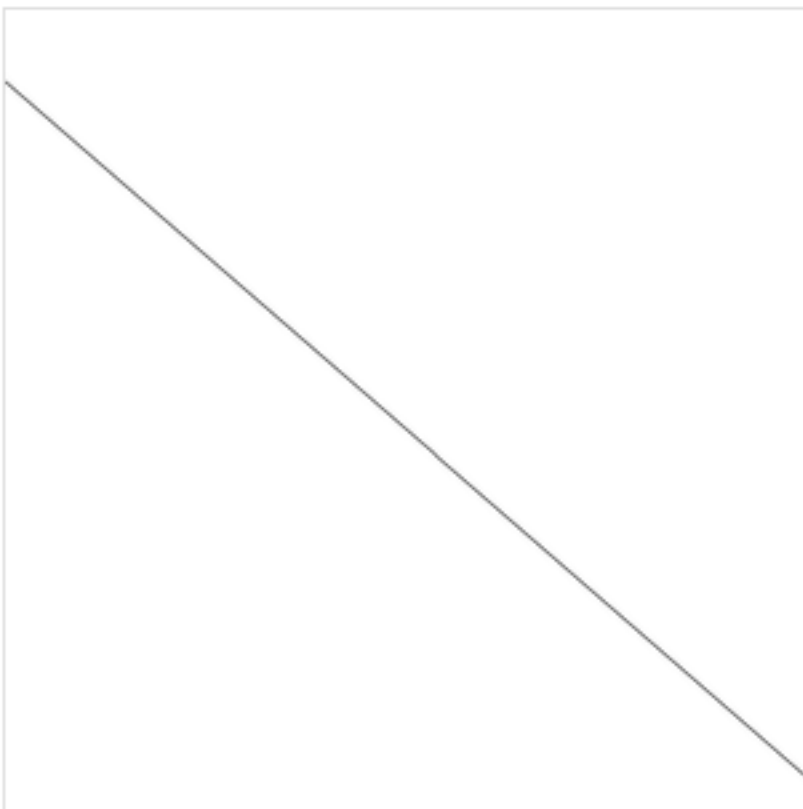

TN90

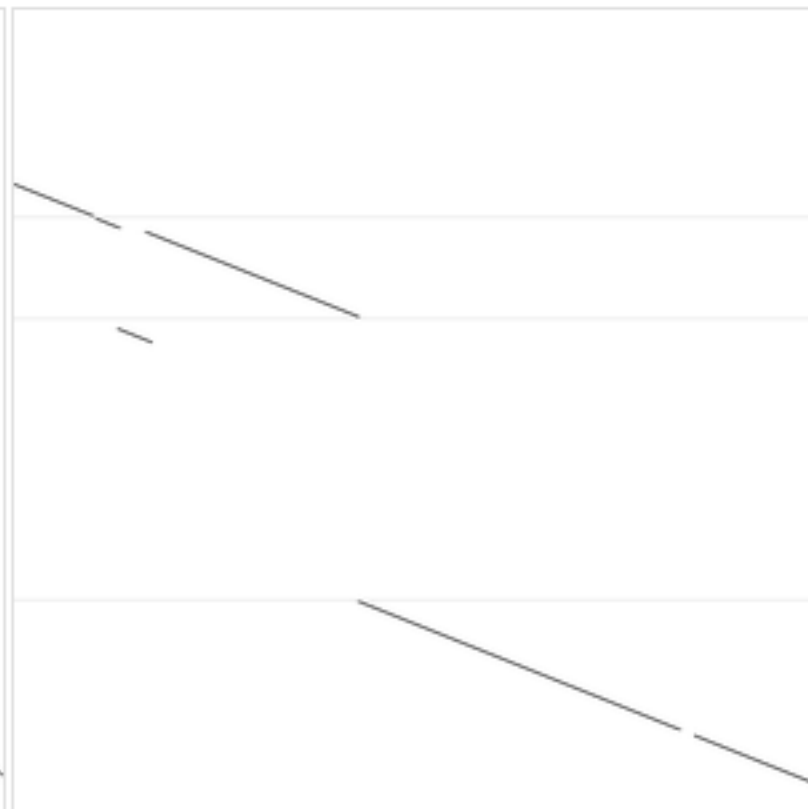

K326

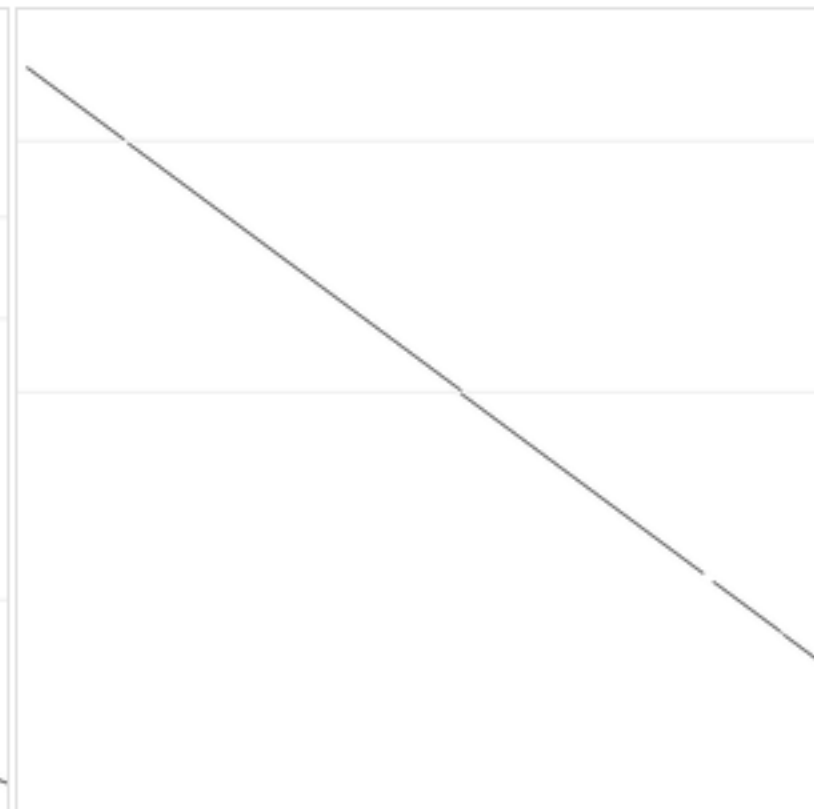

BX
