# Supplementary material for: The tobacco genome sequence and its comparison with those of tomato and potato
Source: PubMed Central journal article supplement (PMC4024737; doi:10.1038/ncomms4833), 2014-05-08

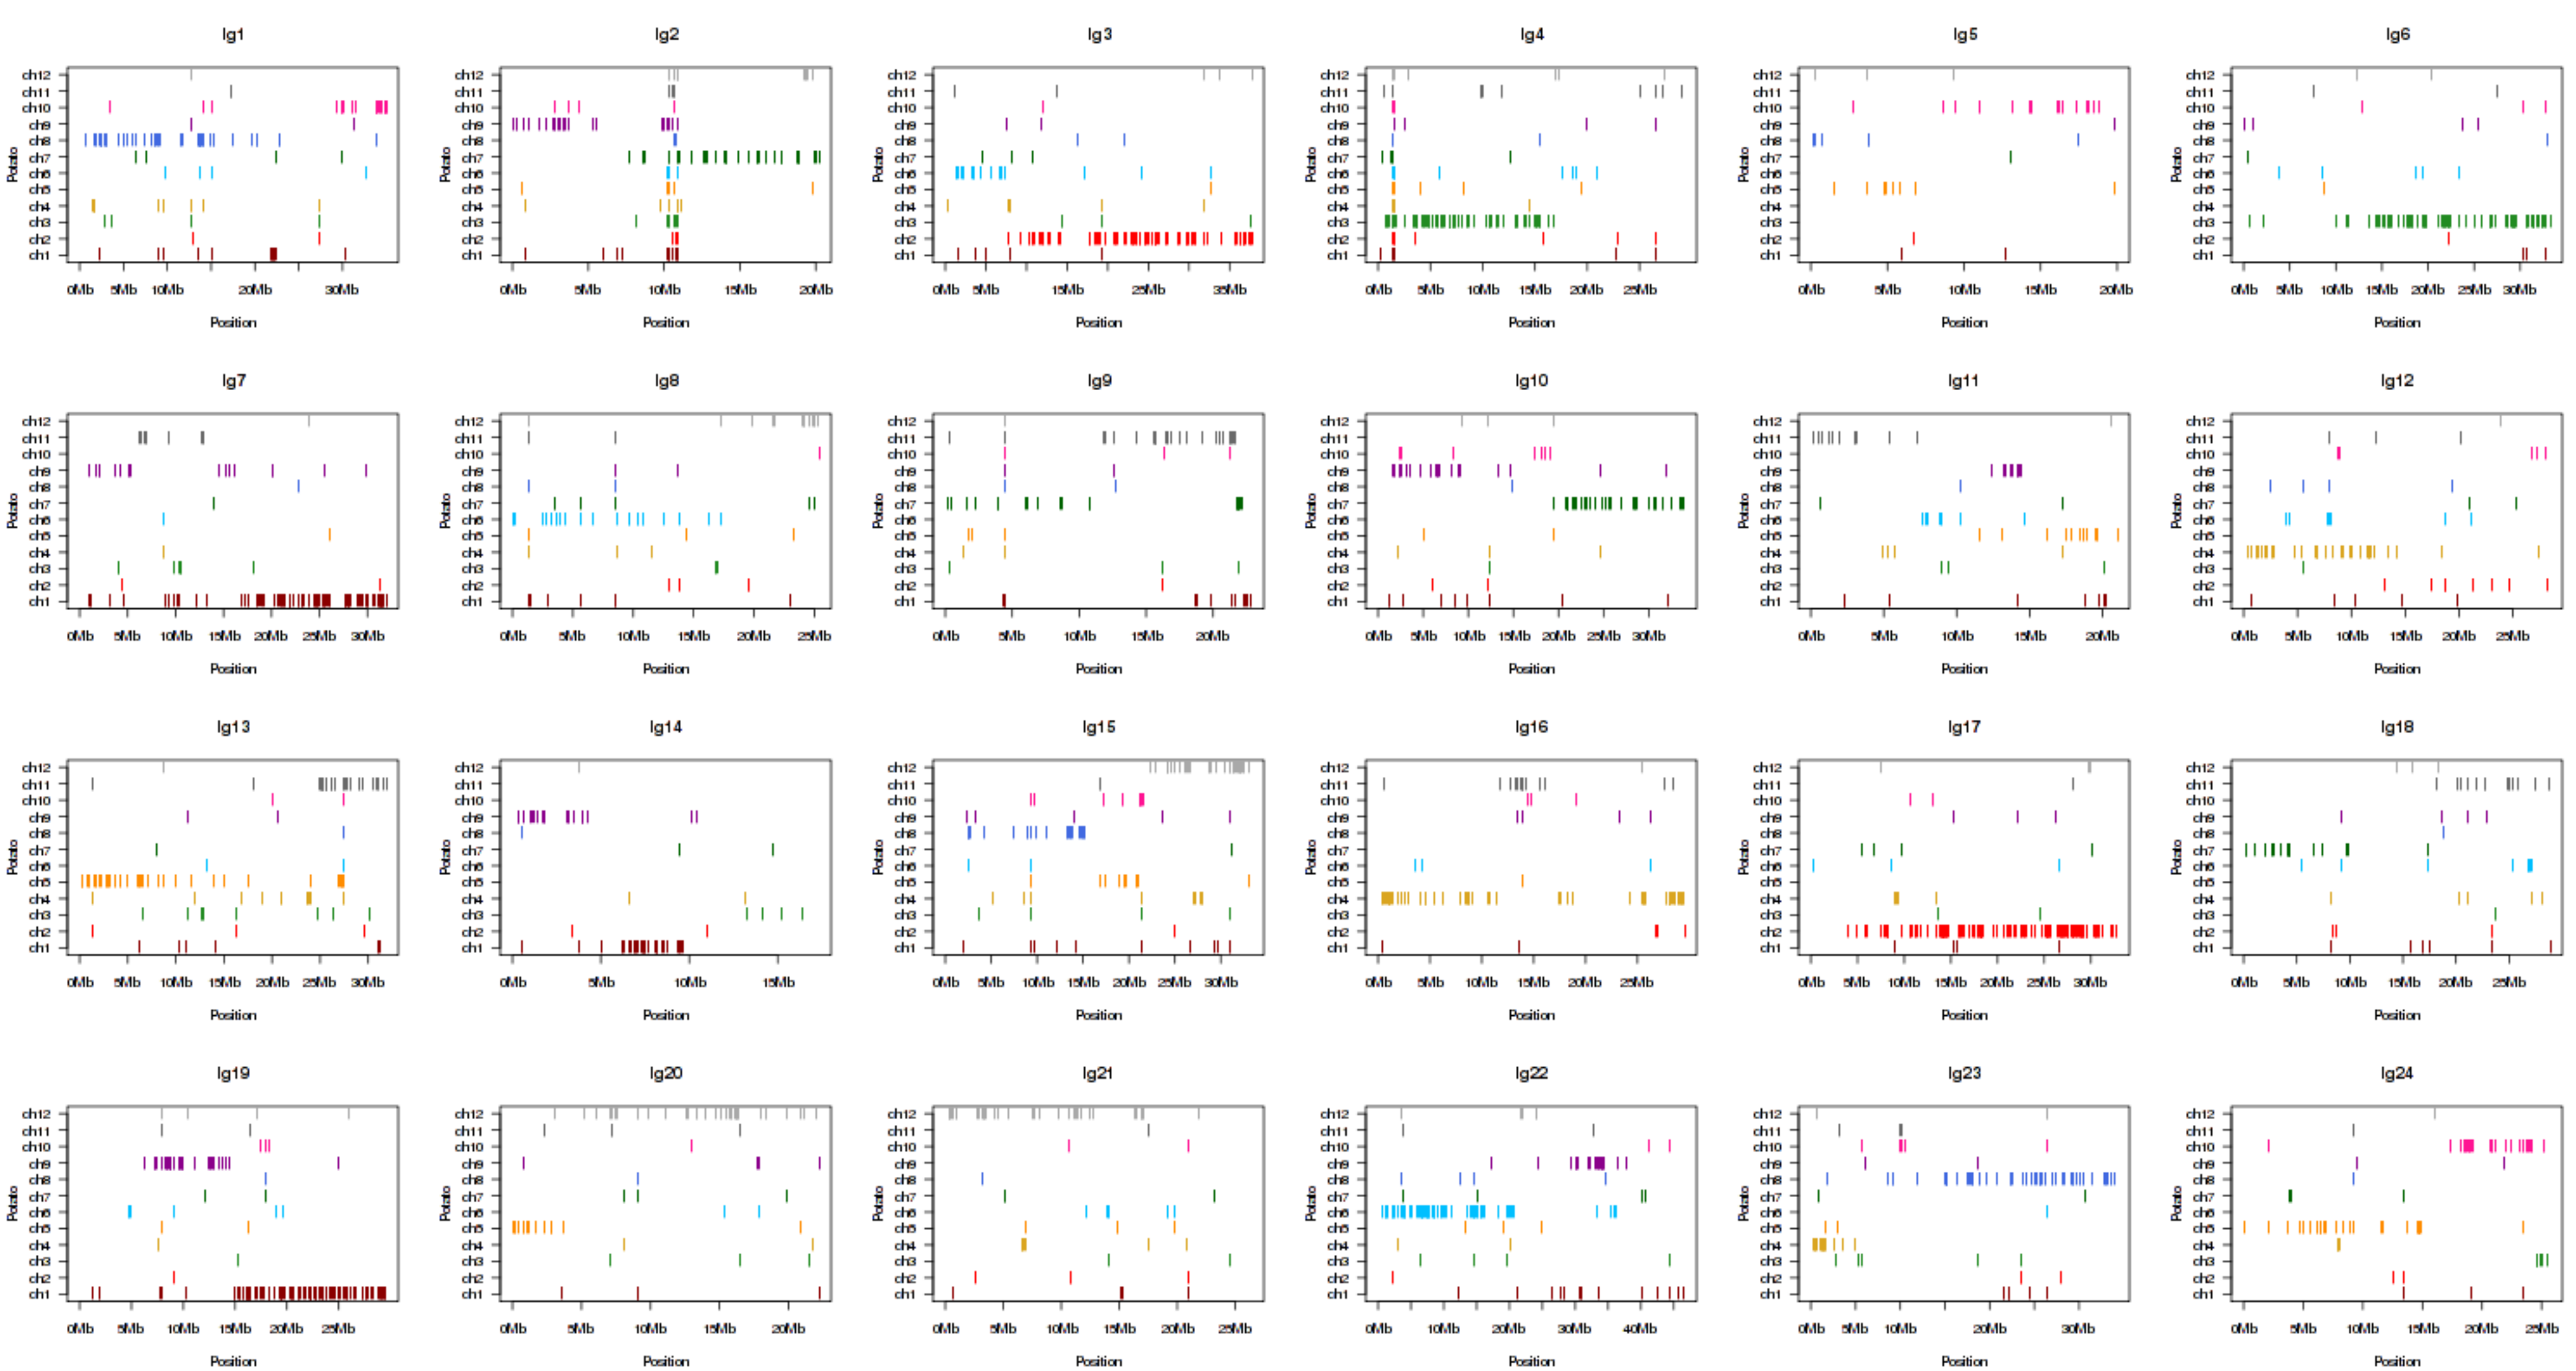

Supplement: ncomms4833-s8.pdf [file ncomms4833-s8.pdf]
