# Supplementary material for: The tobacco genome sequence and its comparison with those of tomato and potato
Source: PubMed Central journal article supplement (PMC4024737; doi:10.1038/ncomms4833), 2014-05-08

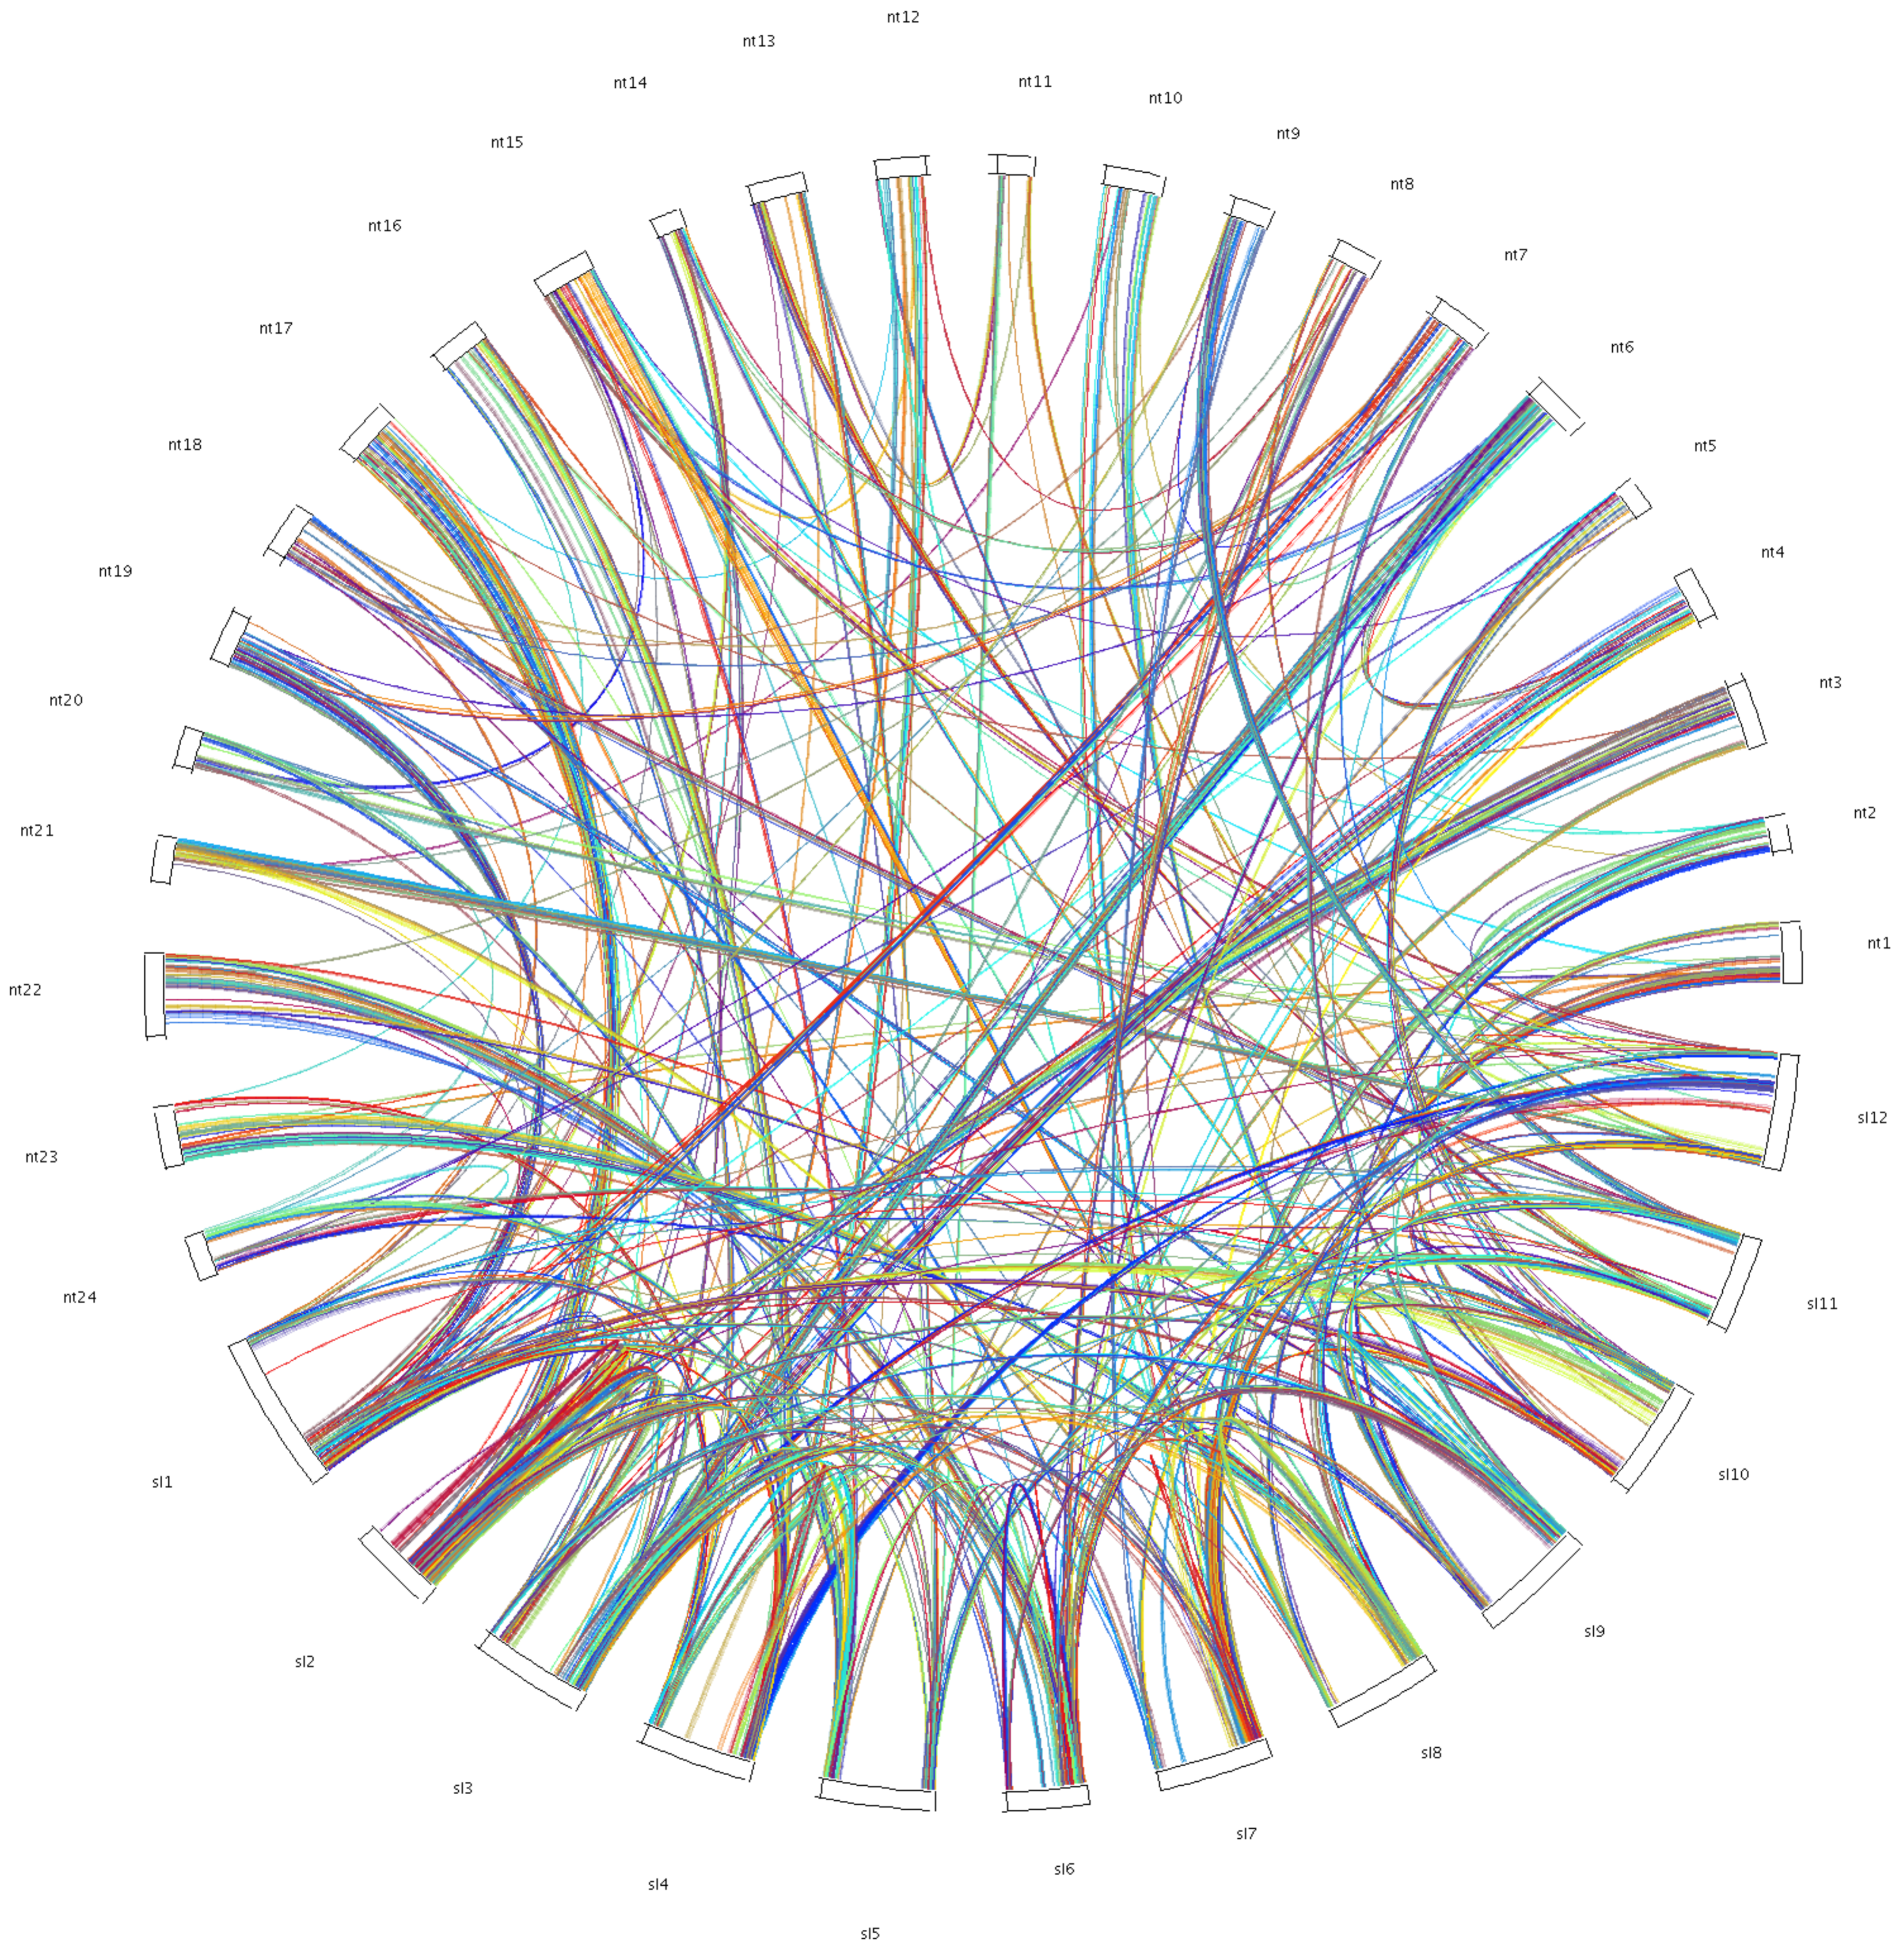

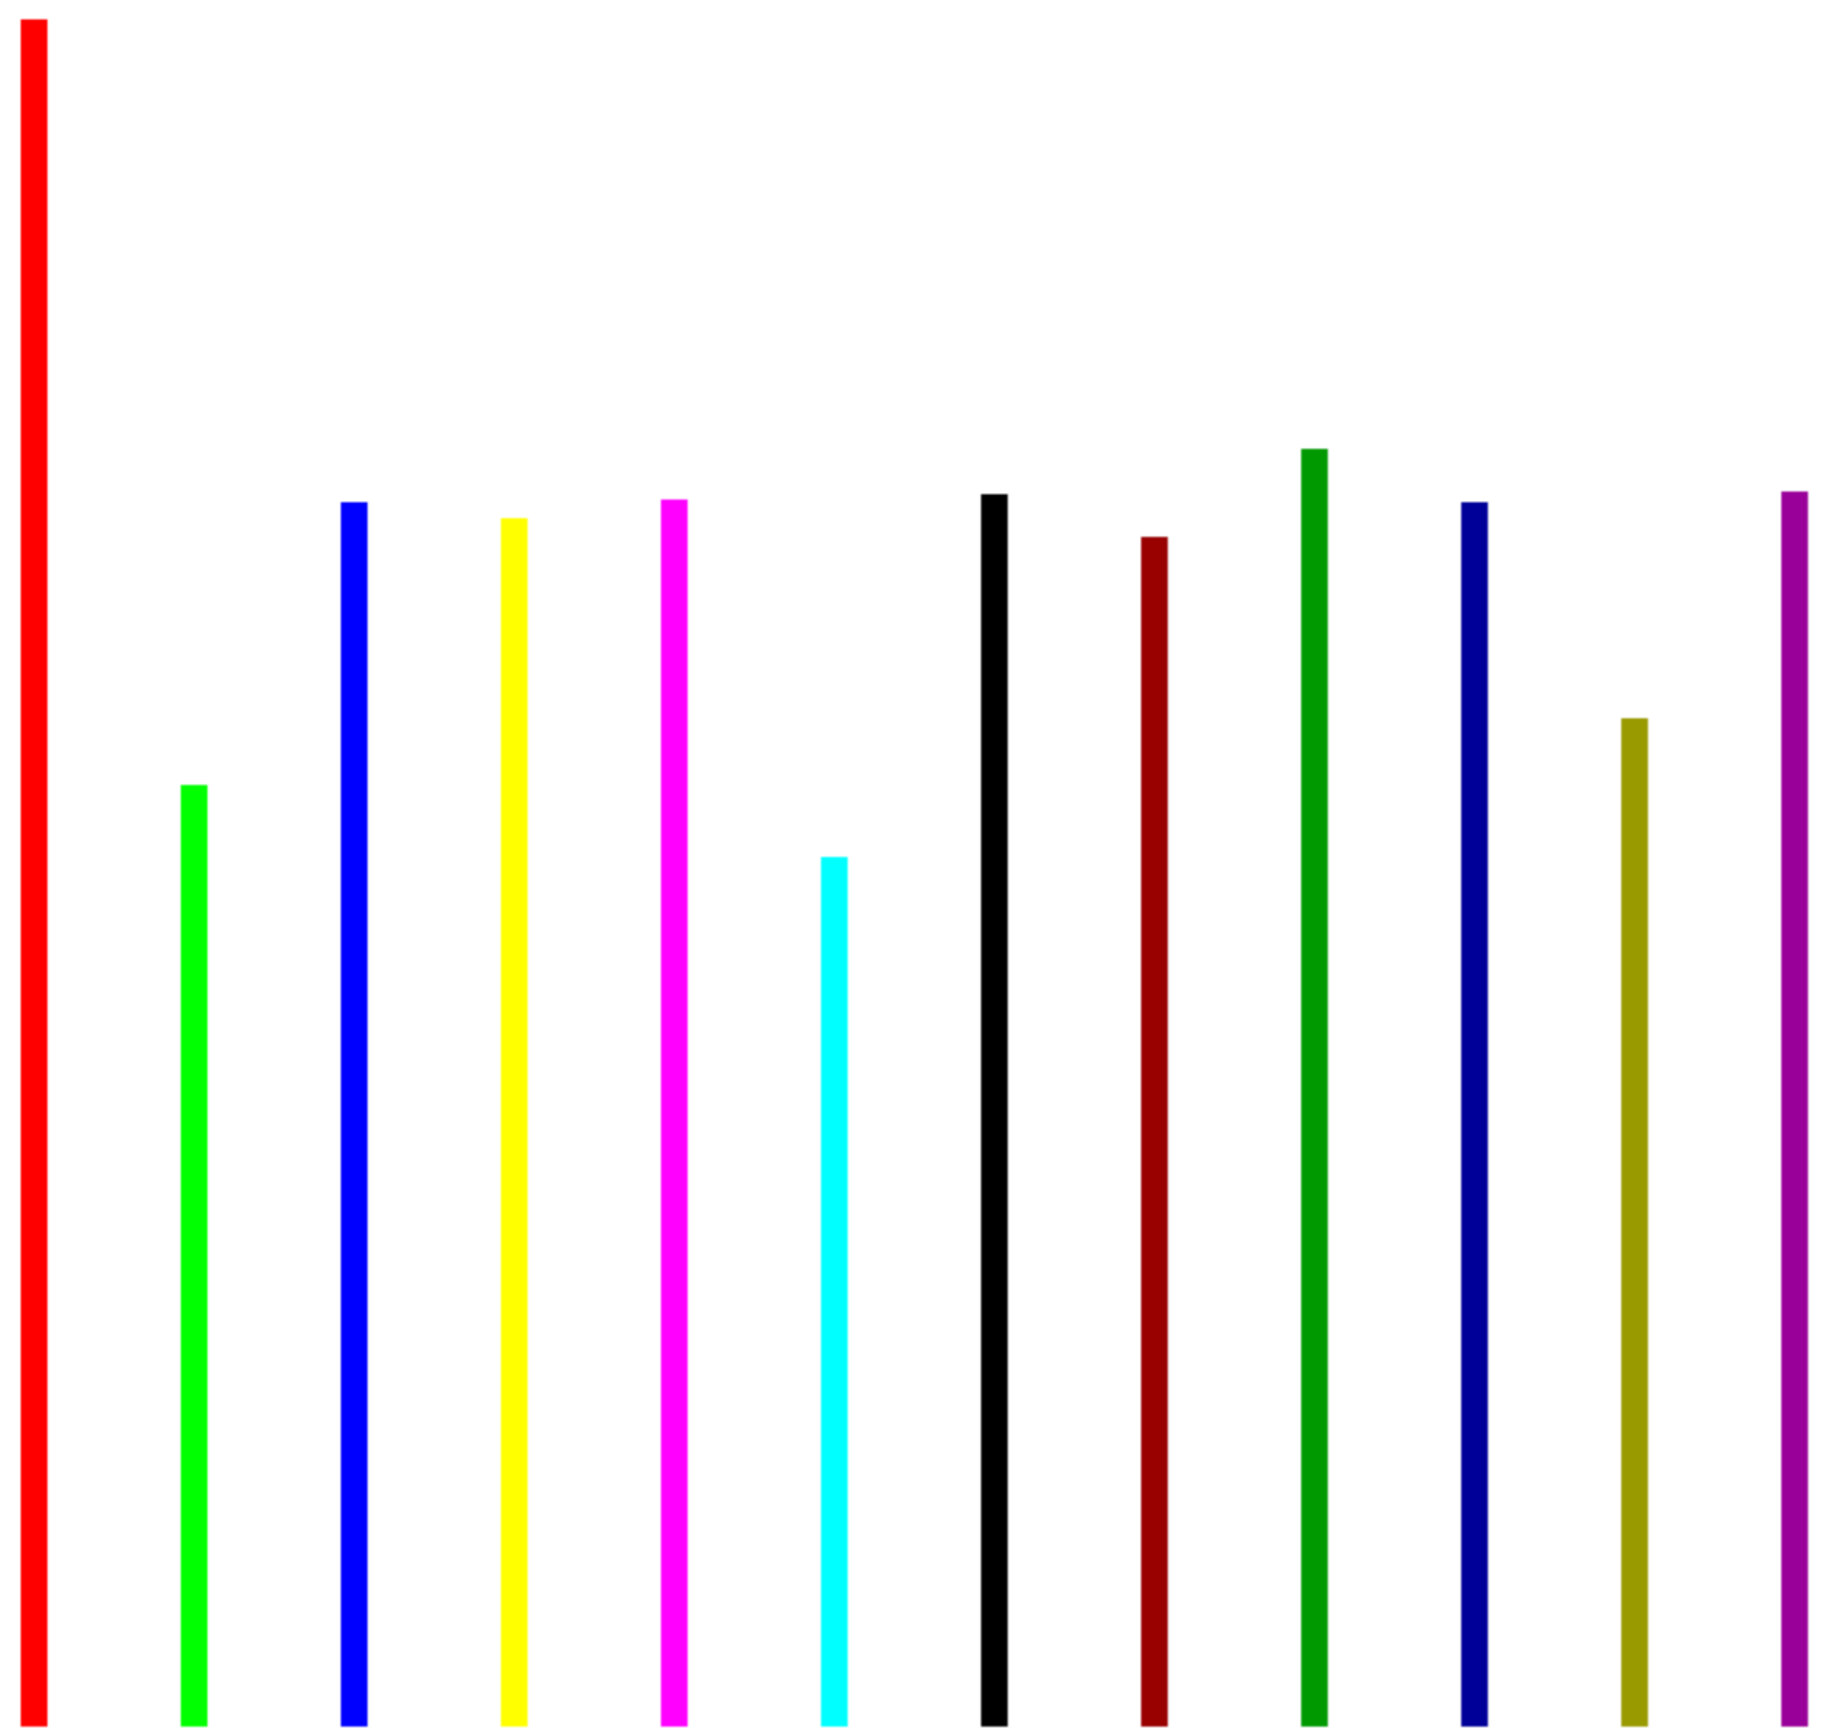

s11 s12 s13 s14 s15 s16 s17 s18 s19 s110 s111 s112

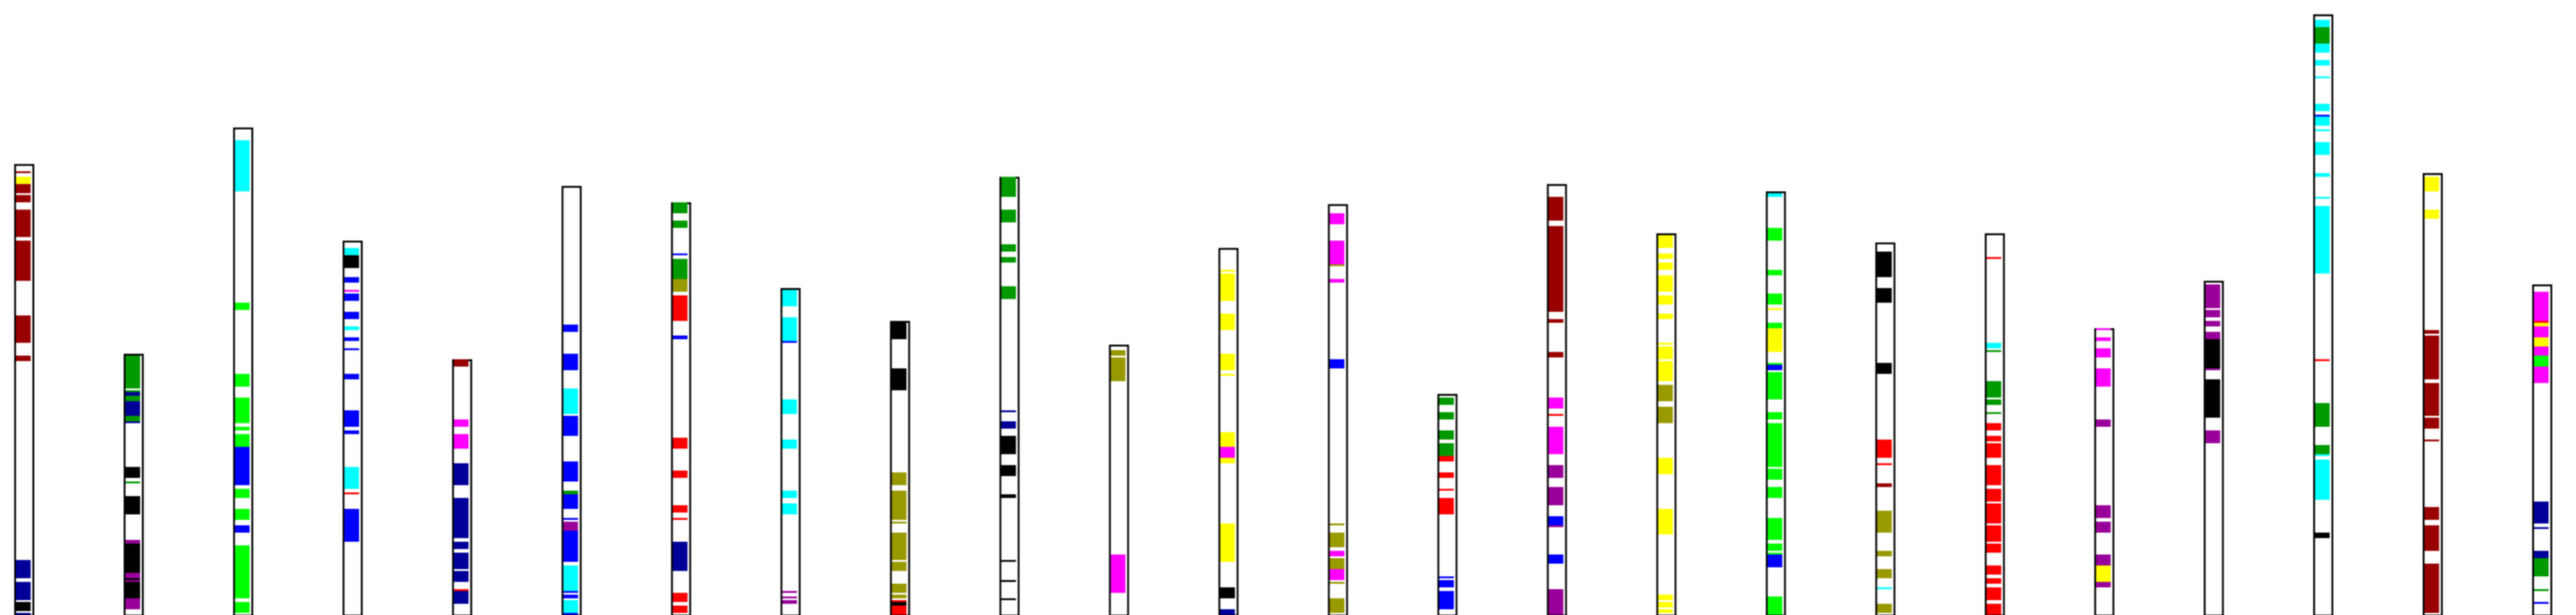

nt1 nt2 nt3 nt4 nt5 nt6 nt7 nt8 nt9 nt10 nt11 nt12 nt13 nt14 nt15 nt16 nt17 nt18 nt19 nt20 nt21 nt22 nt23 nt24

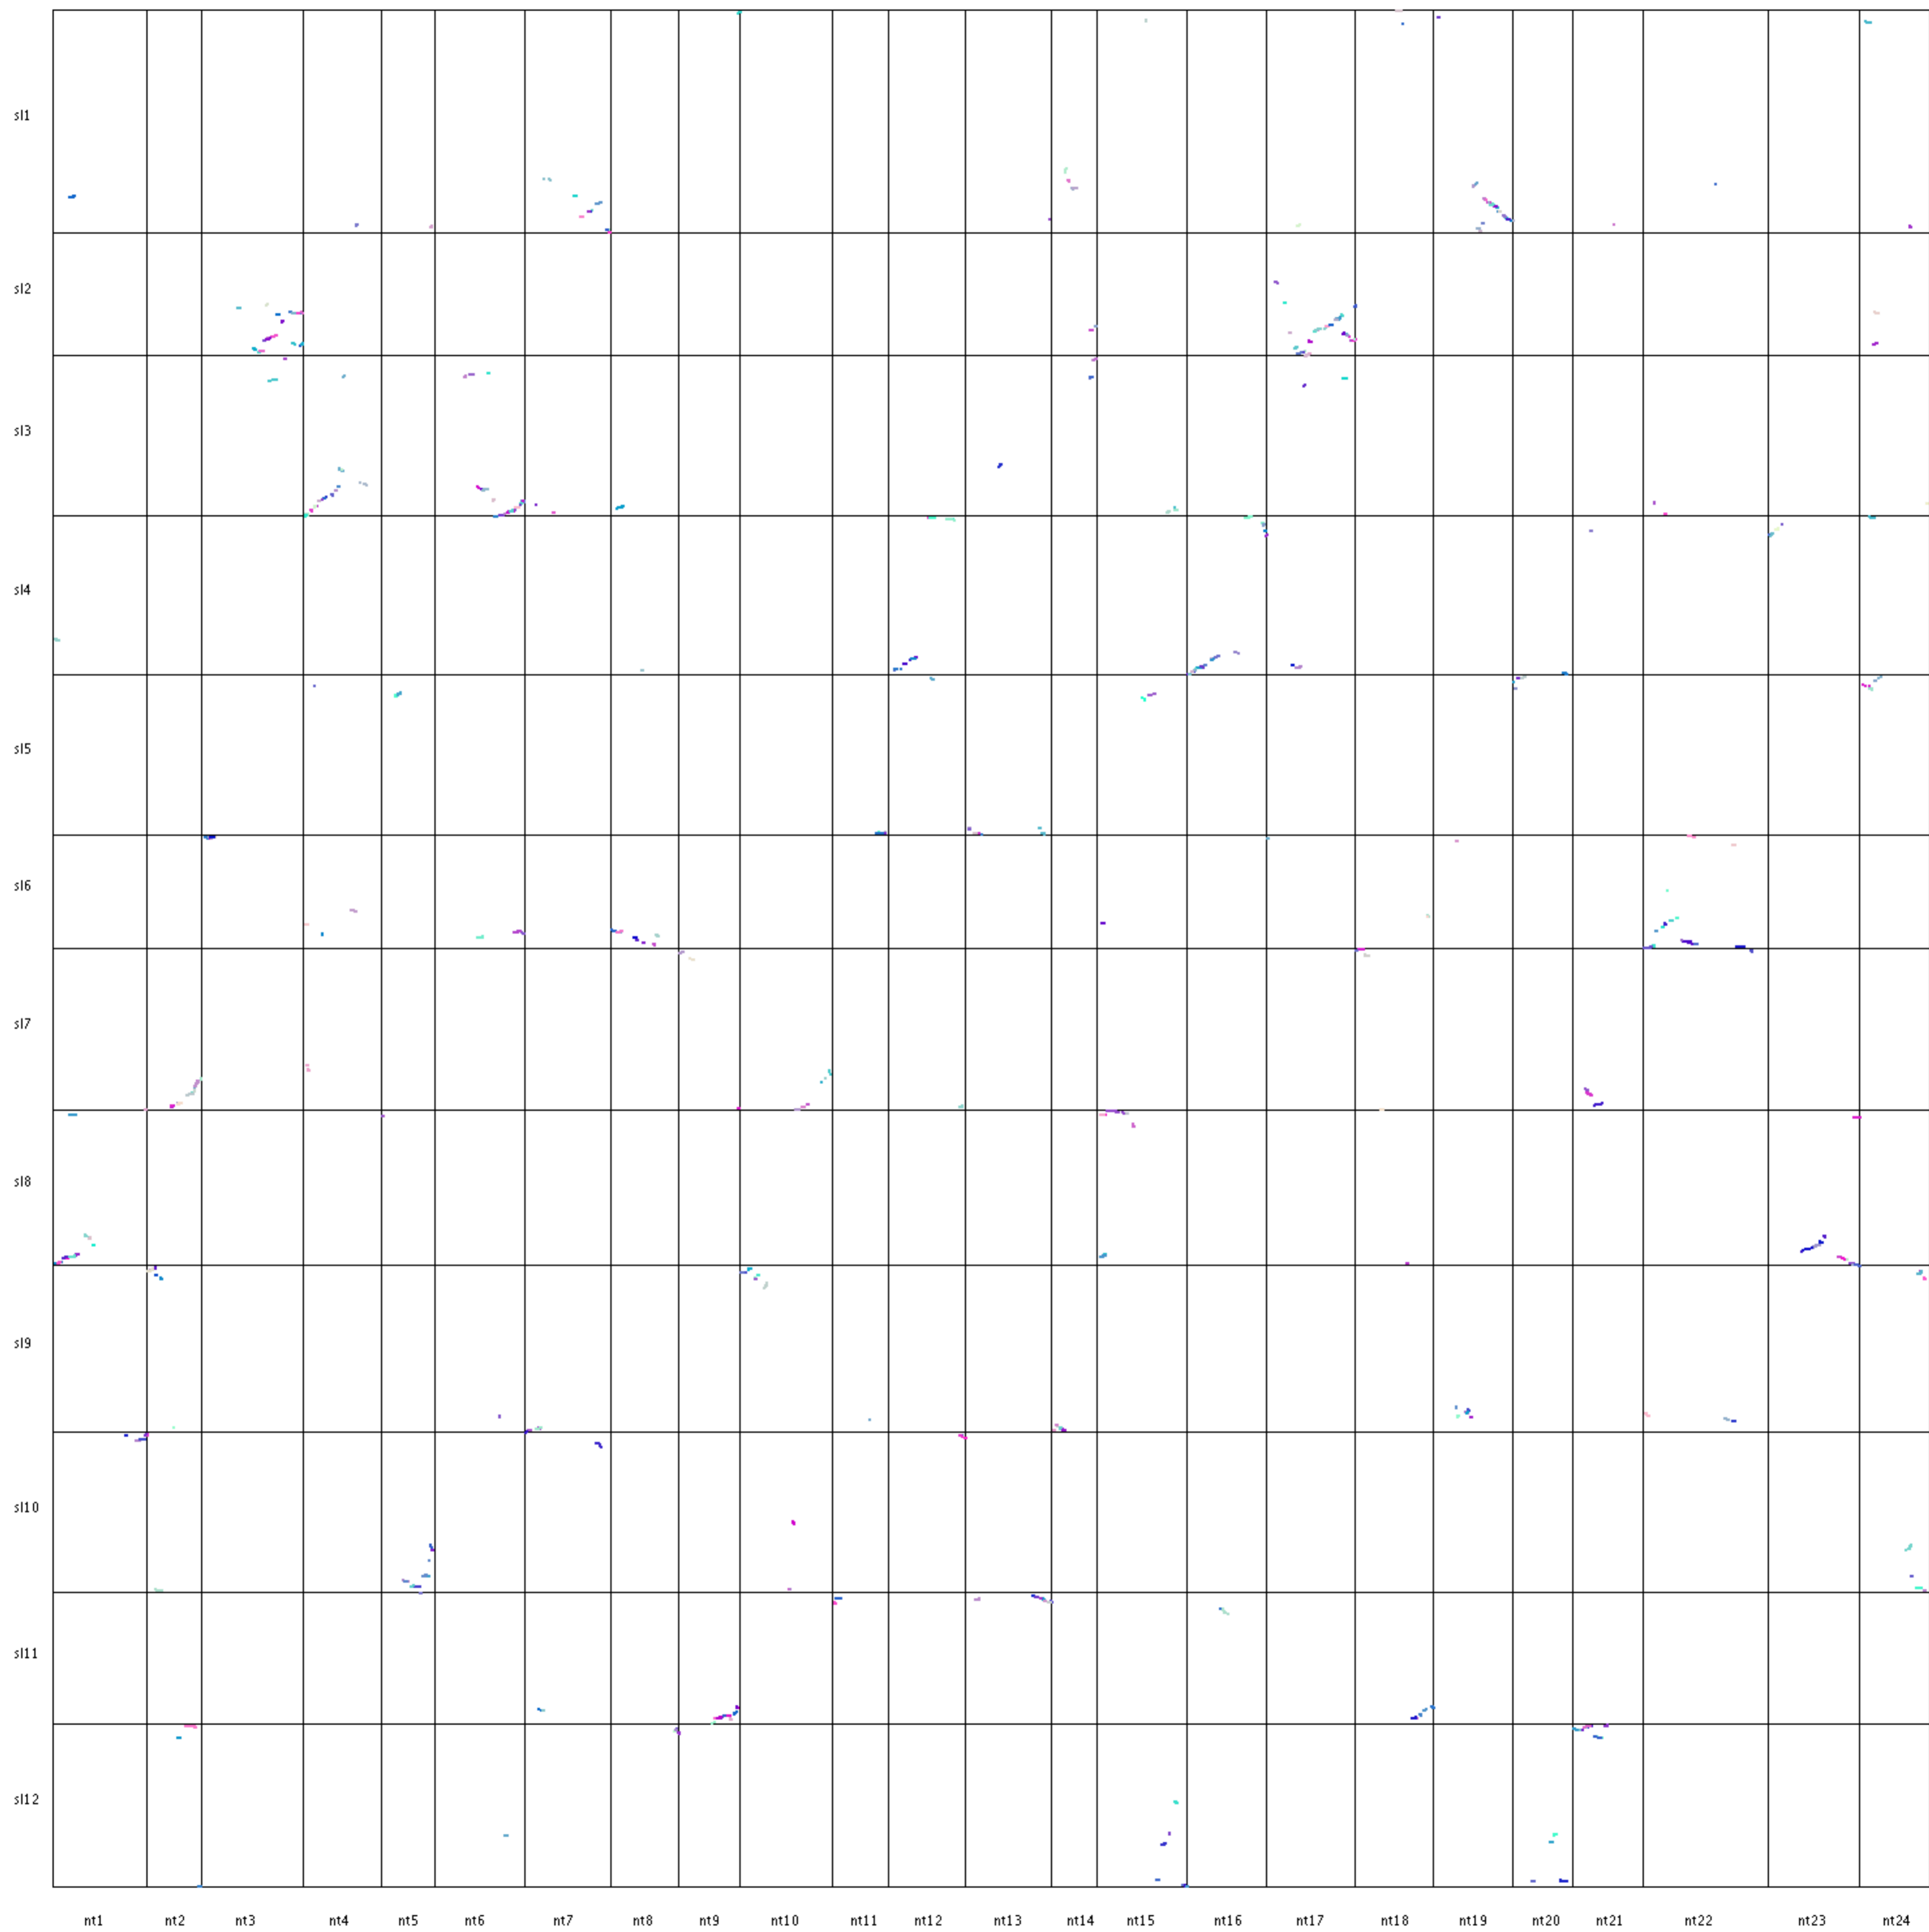

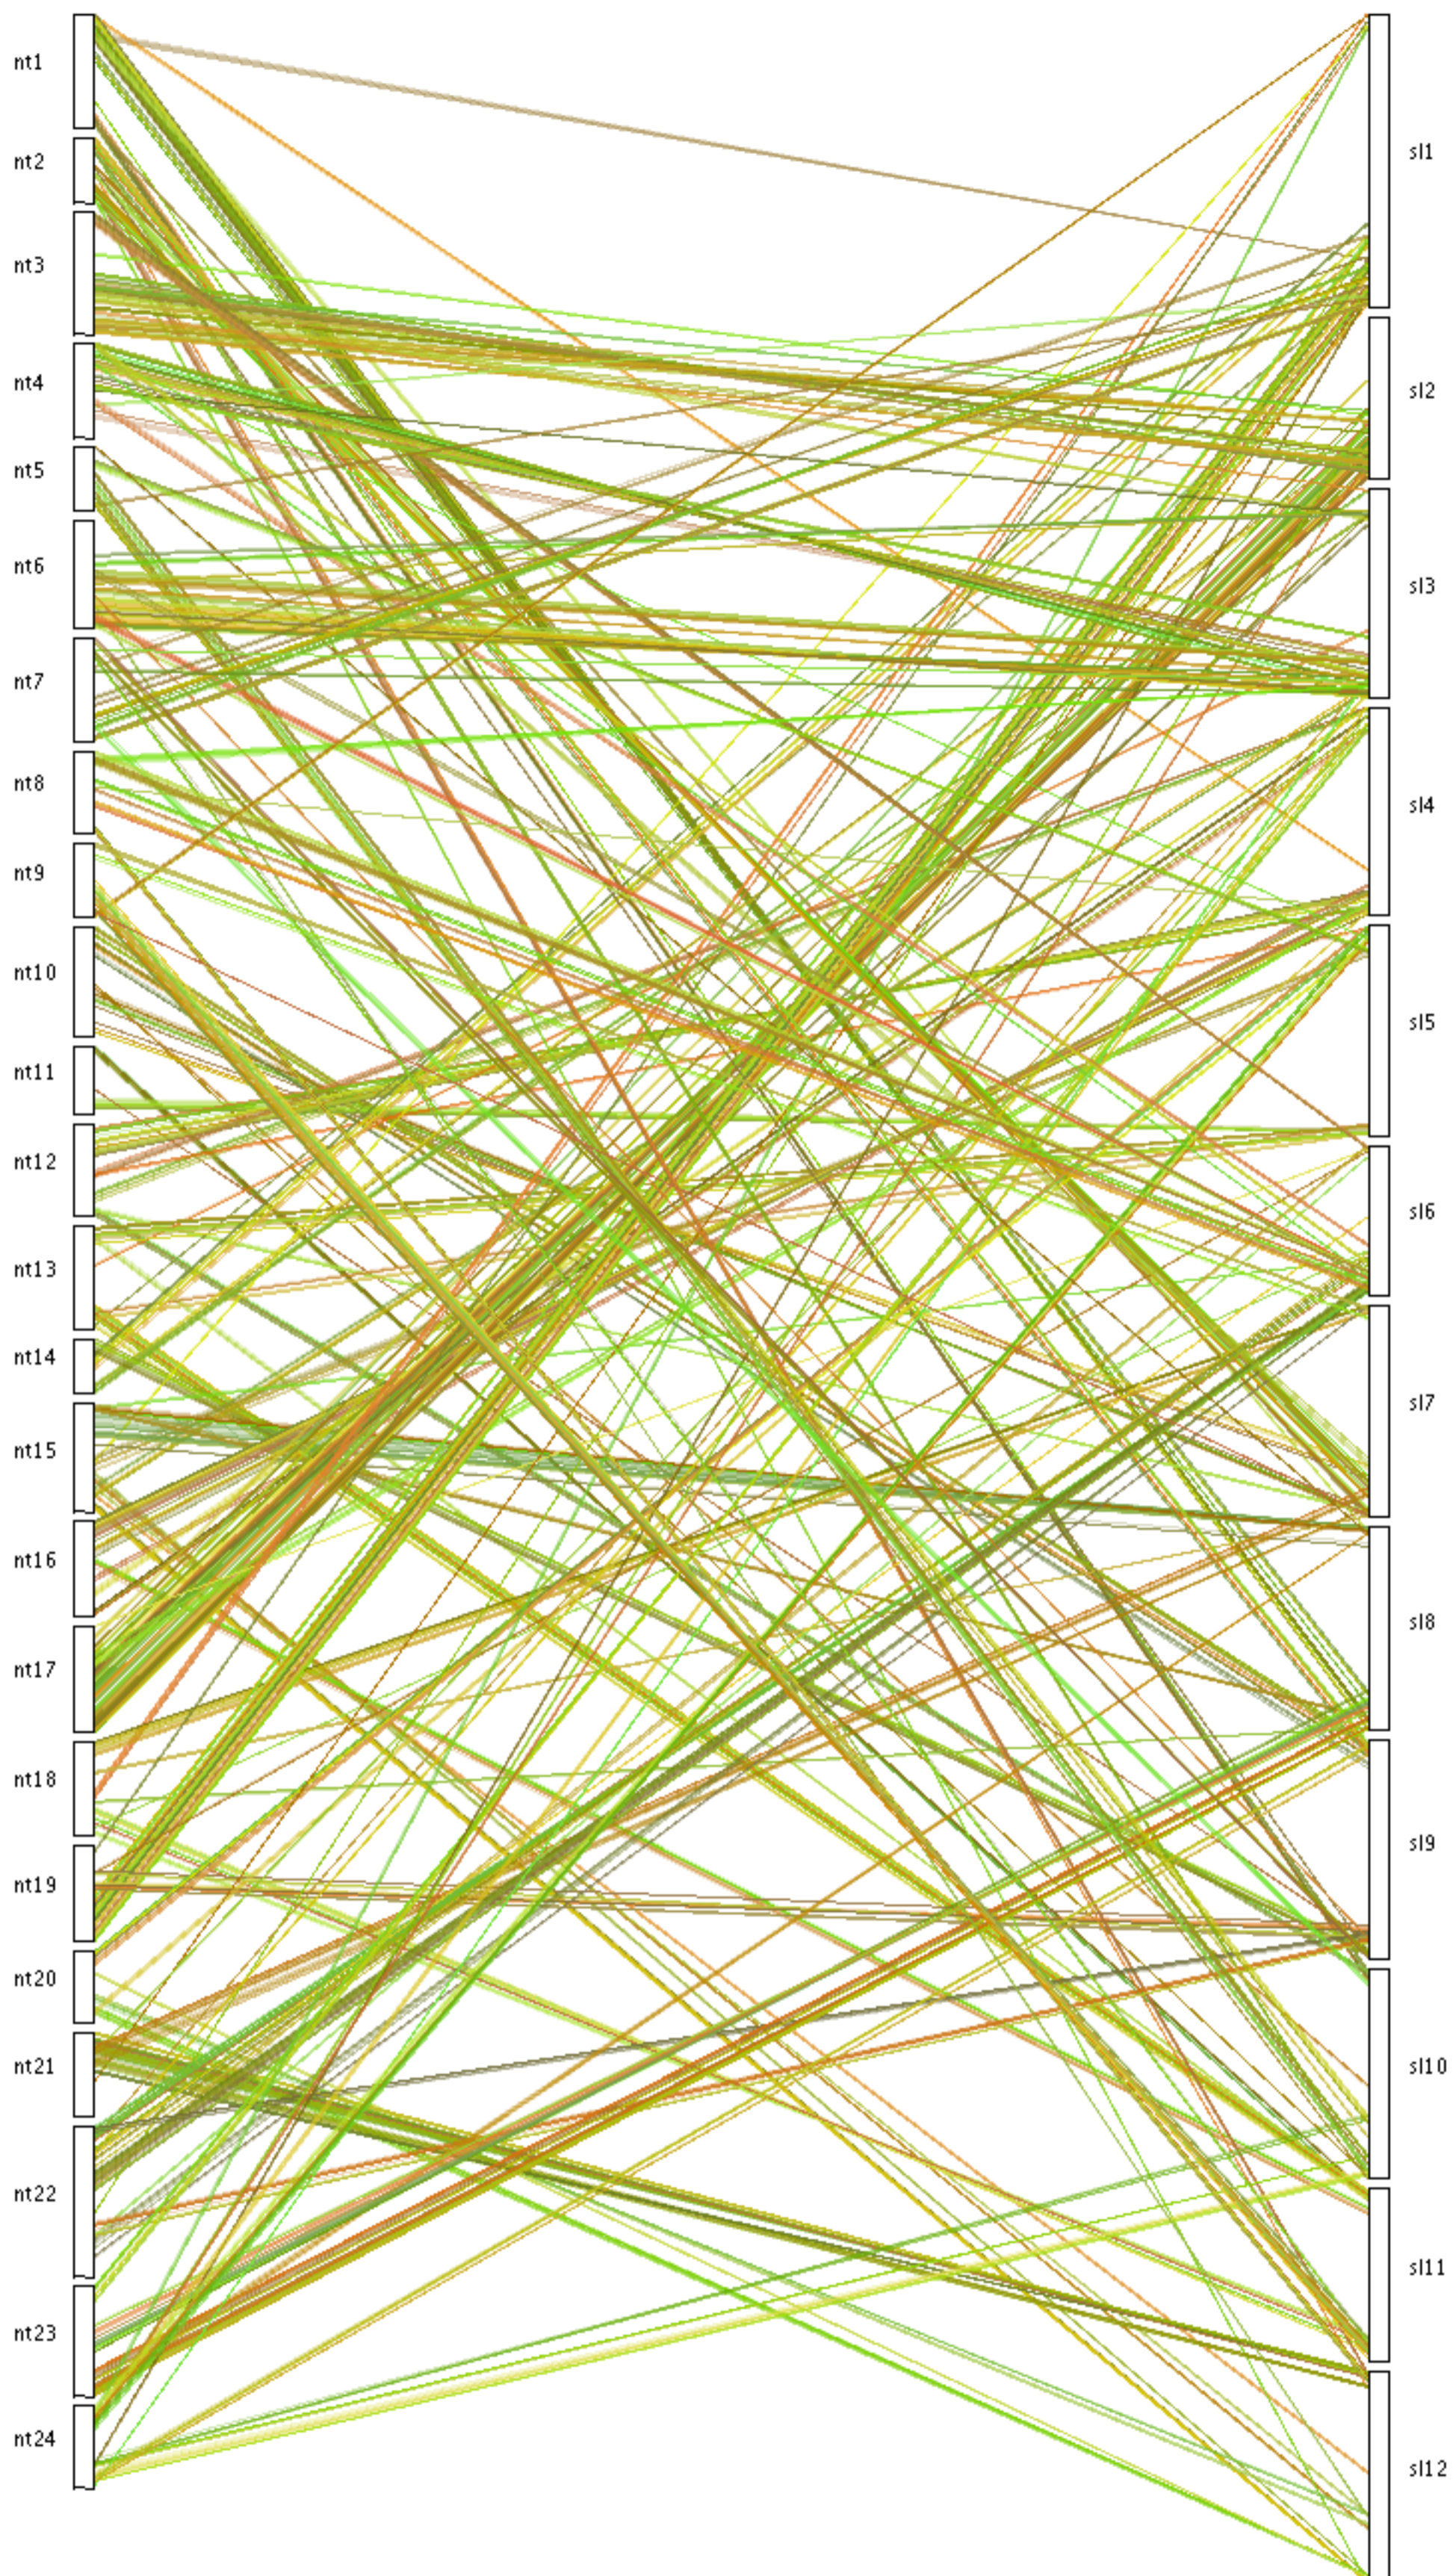

Supplement: ncomms4833-s9.pdf [file ncomms4833-s9.pdf]
