# Supplementary material for: The tobacco genome sequence and its comparison with those of tomato and potato
Source: PubMed Central journal article supplement (PMC4024737; doi:10.1038/ncomms4833), 2014-05-08

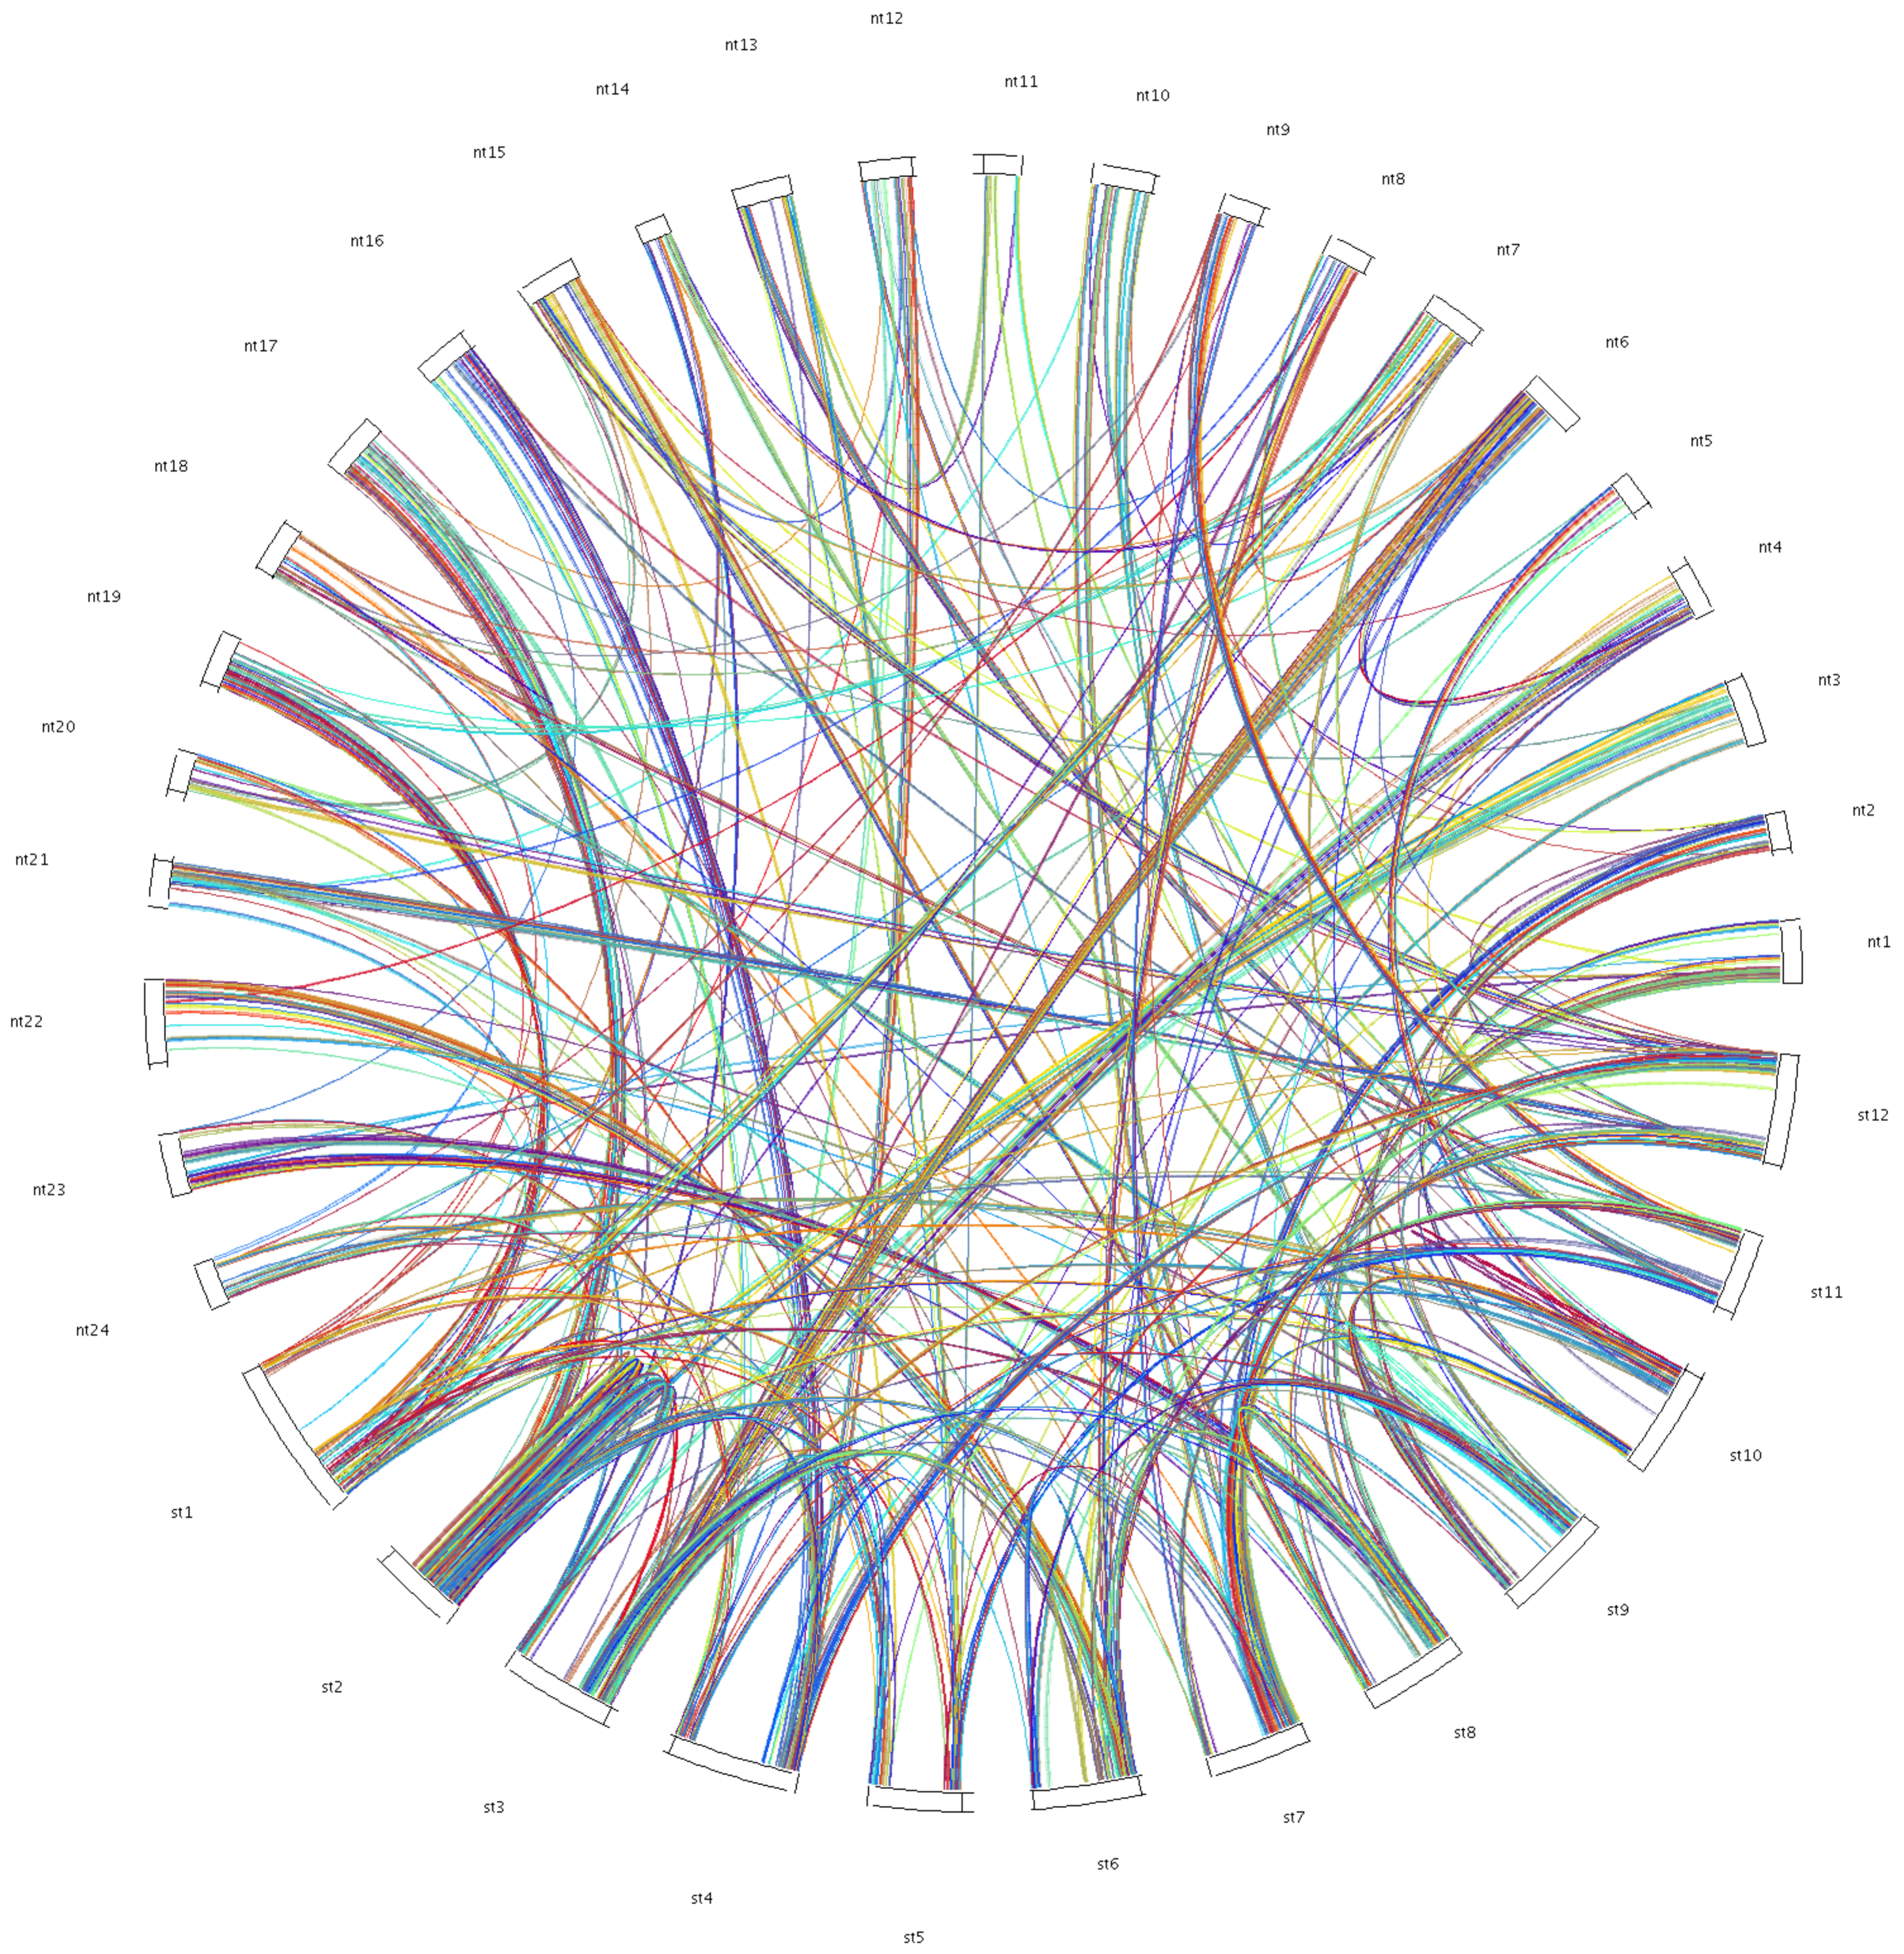



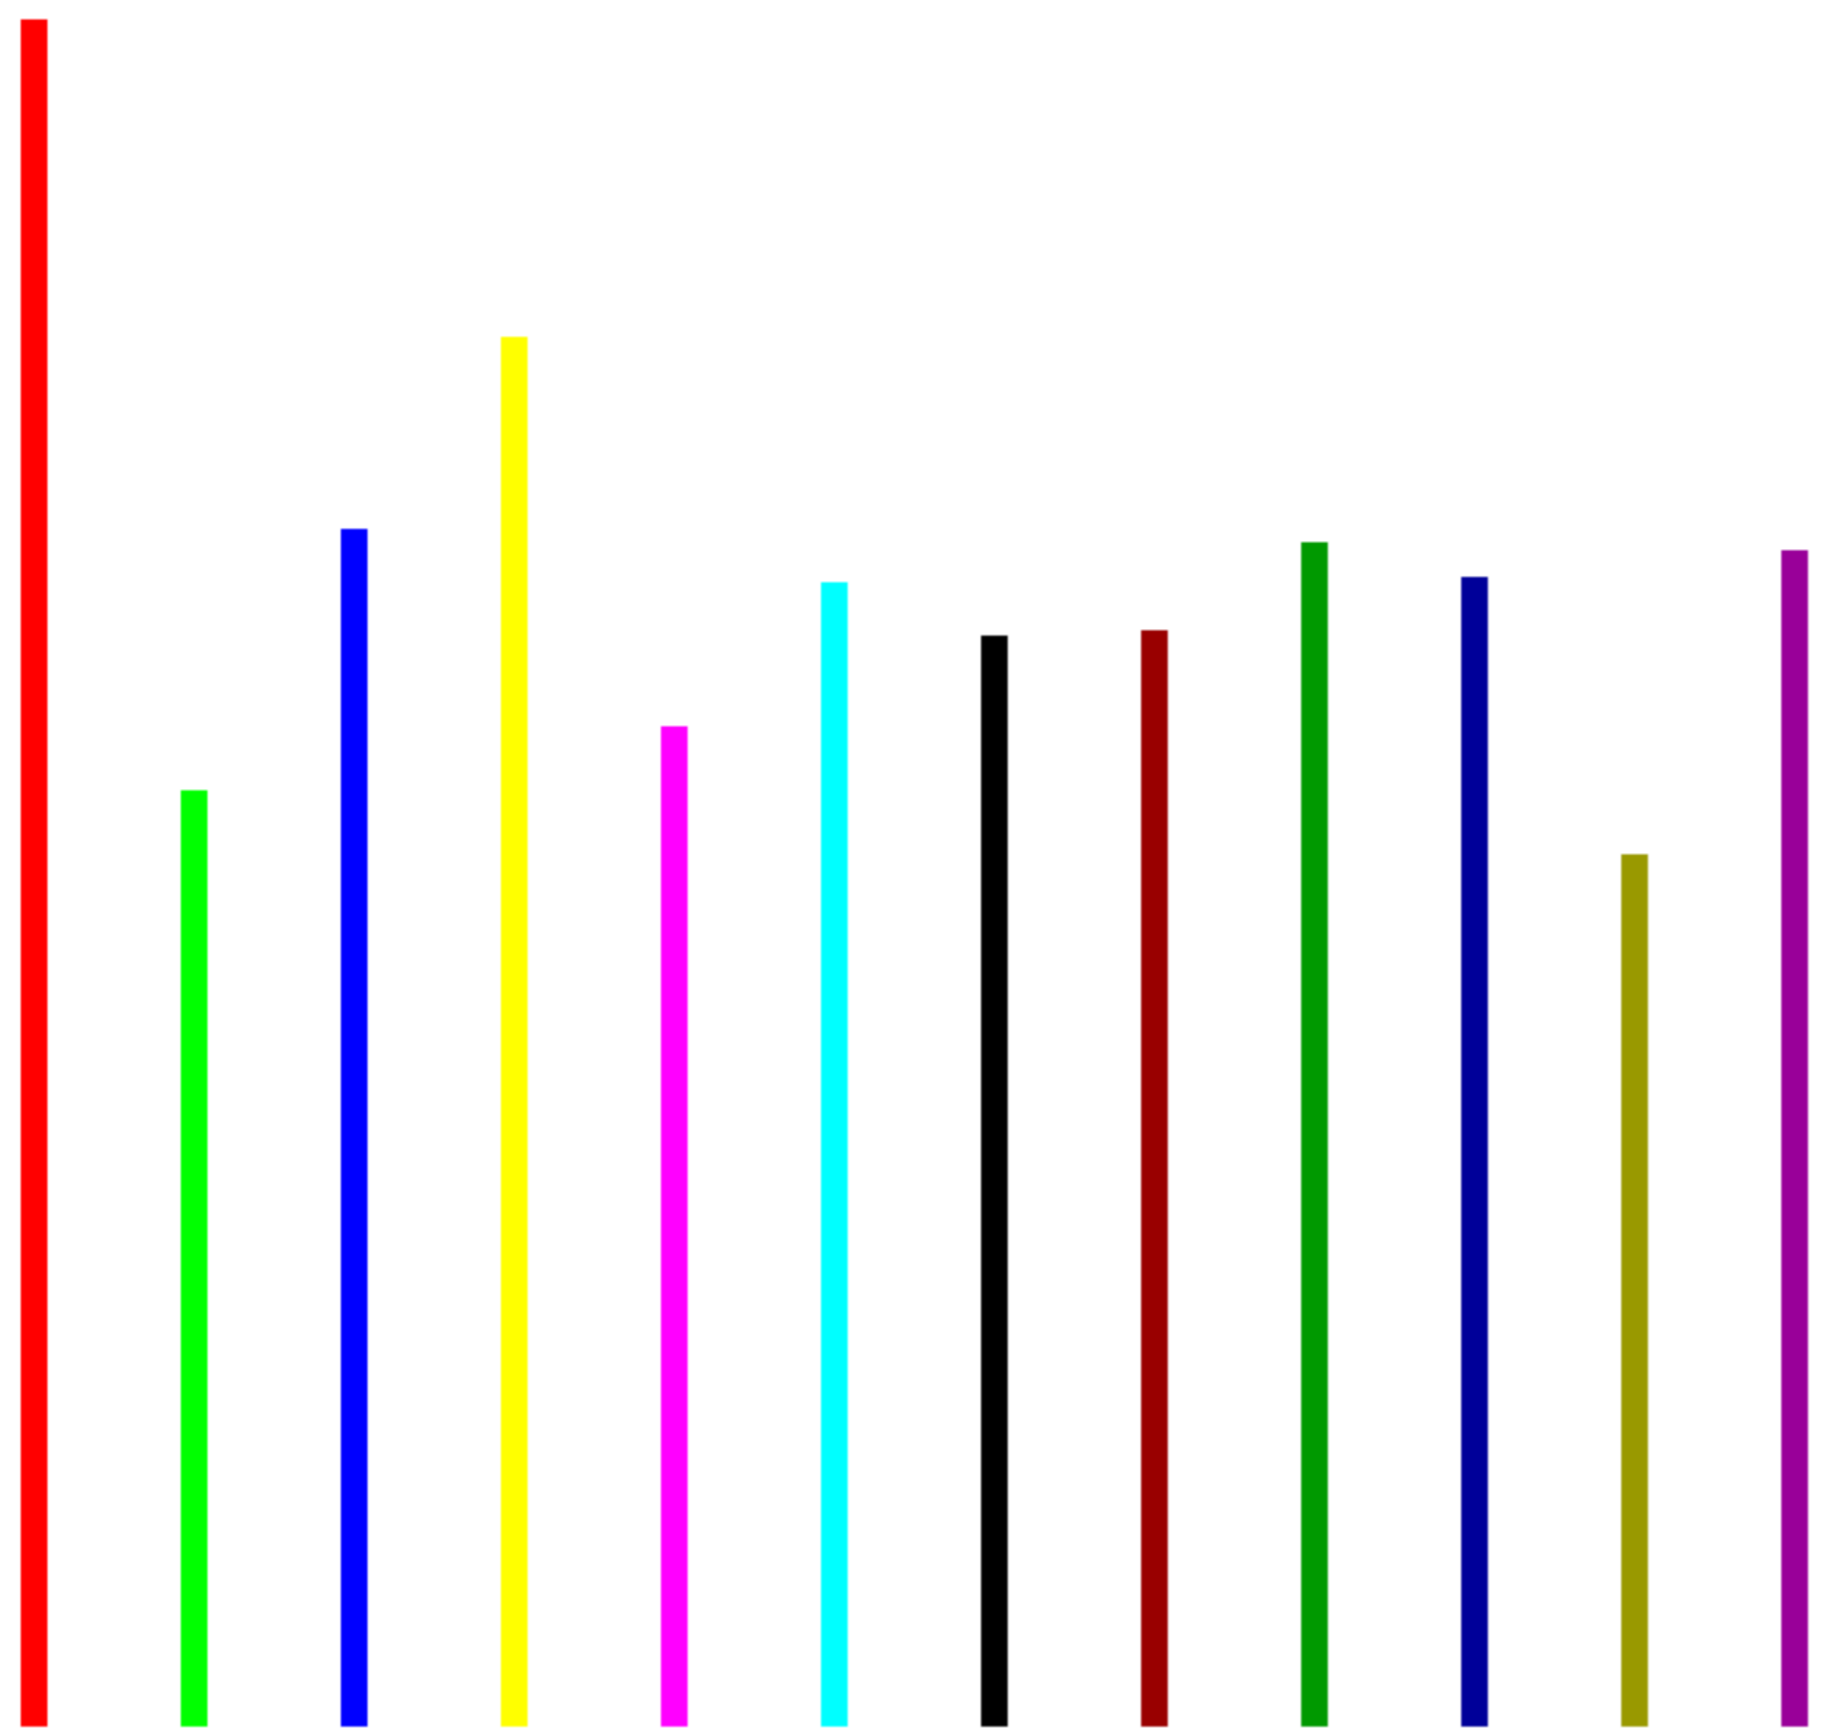

st1 st2 st3 st4 st5 st6 st7 st8 st9 st10 st11 st12

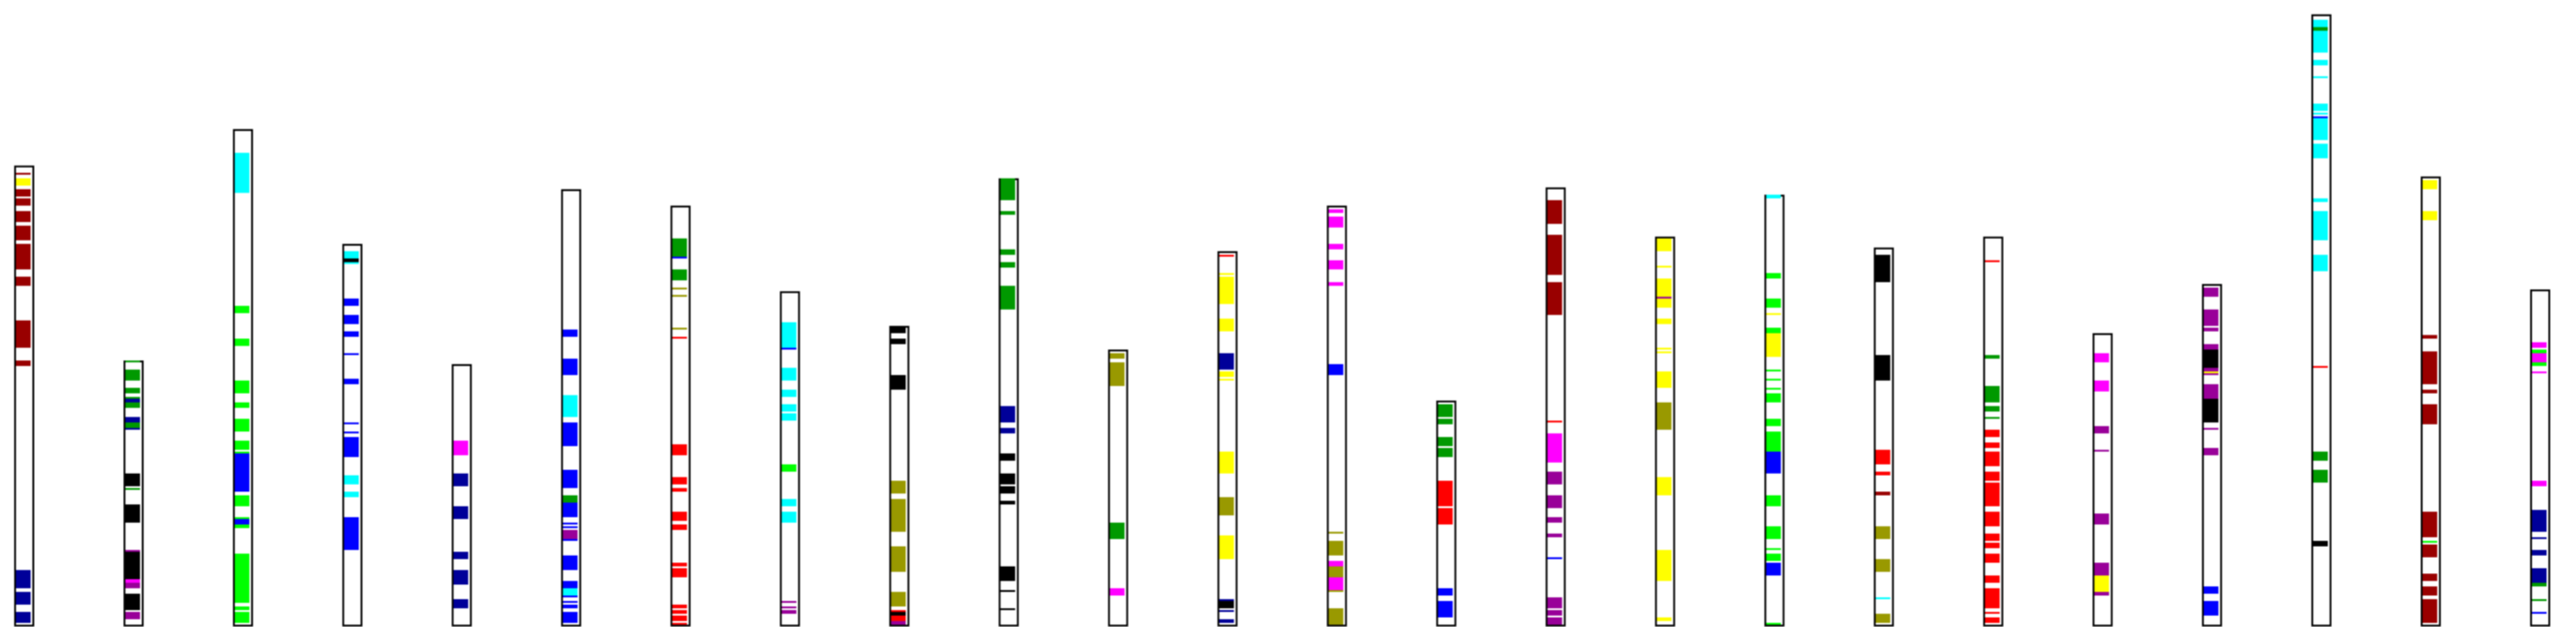

nt1 nt2 nt3 nt4 nt5 nt6 nt7 nt8 nt9 nt10 nt11 nt12 nt13 nt14 nt15 nt16 nt17 nt18 nt19 nt20 nt21 nt22 nt23 nt24

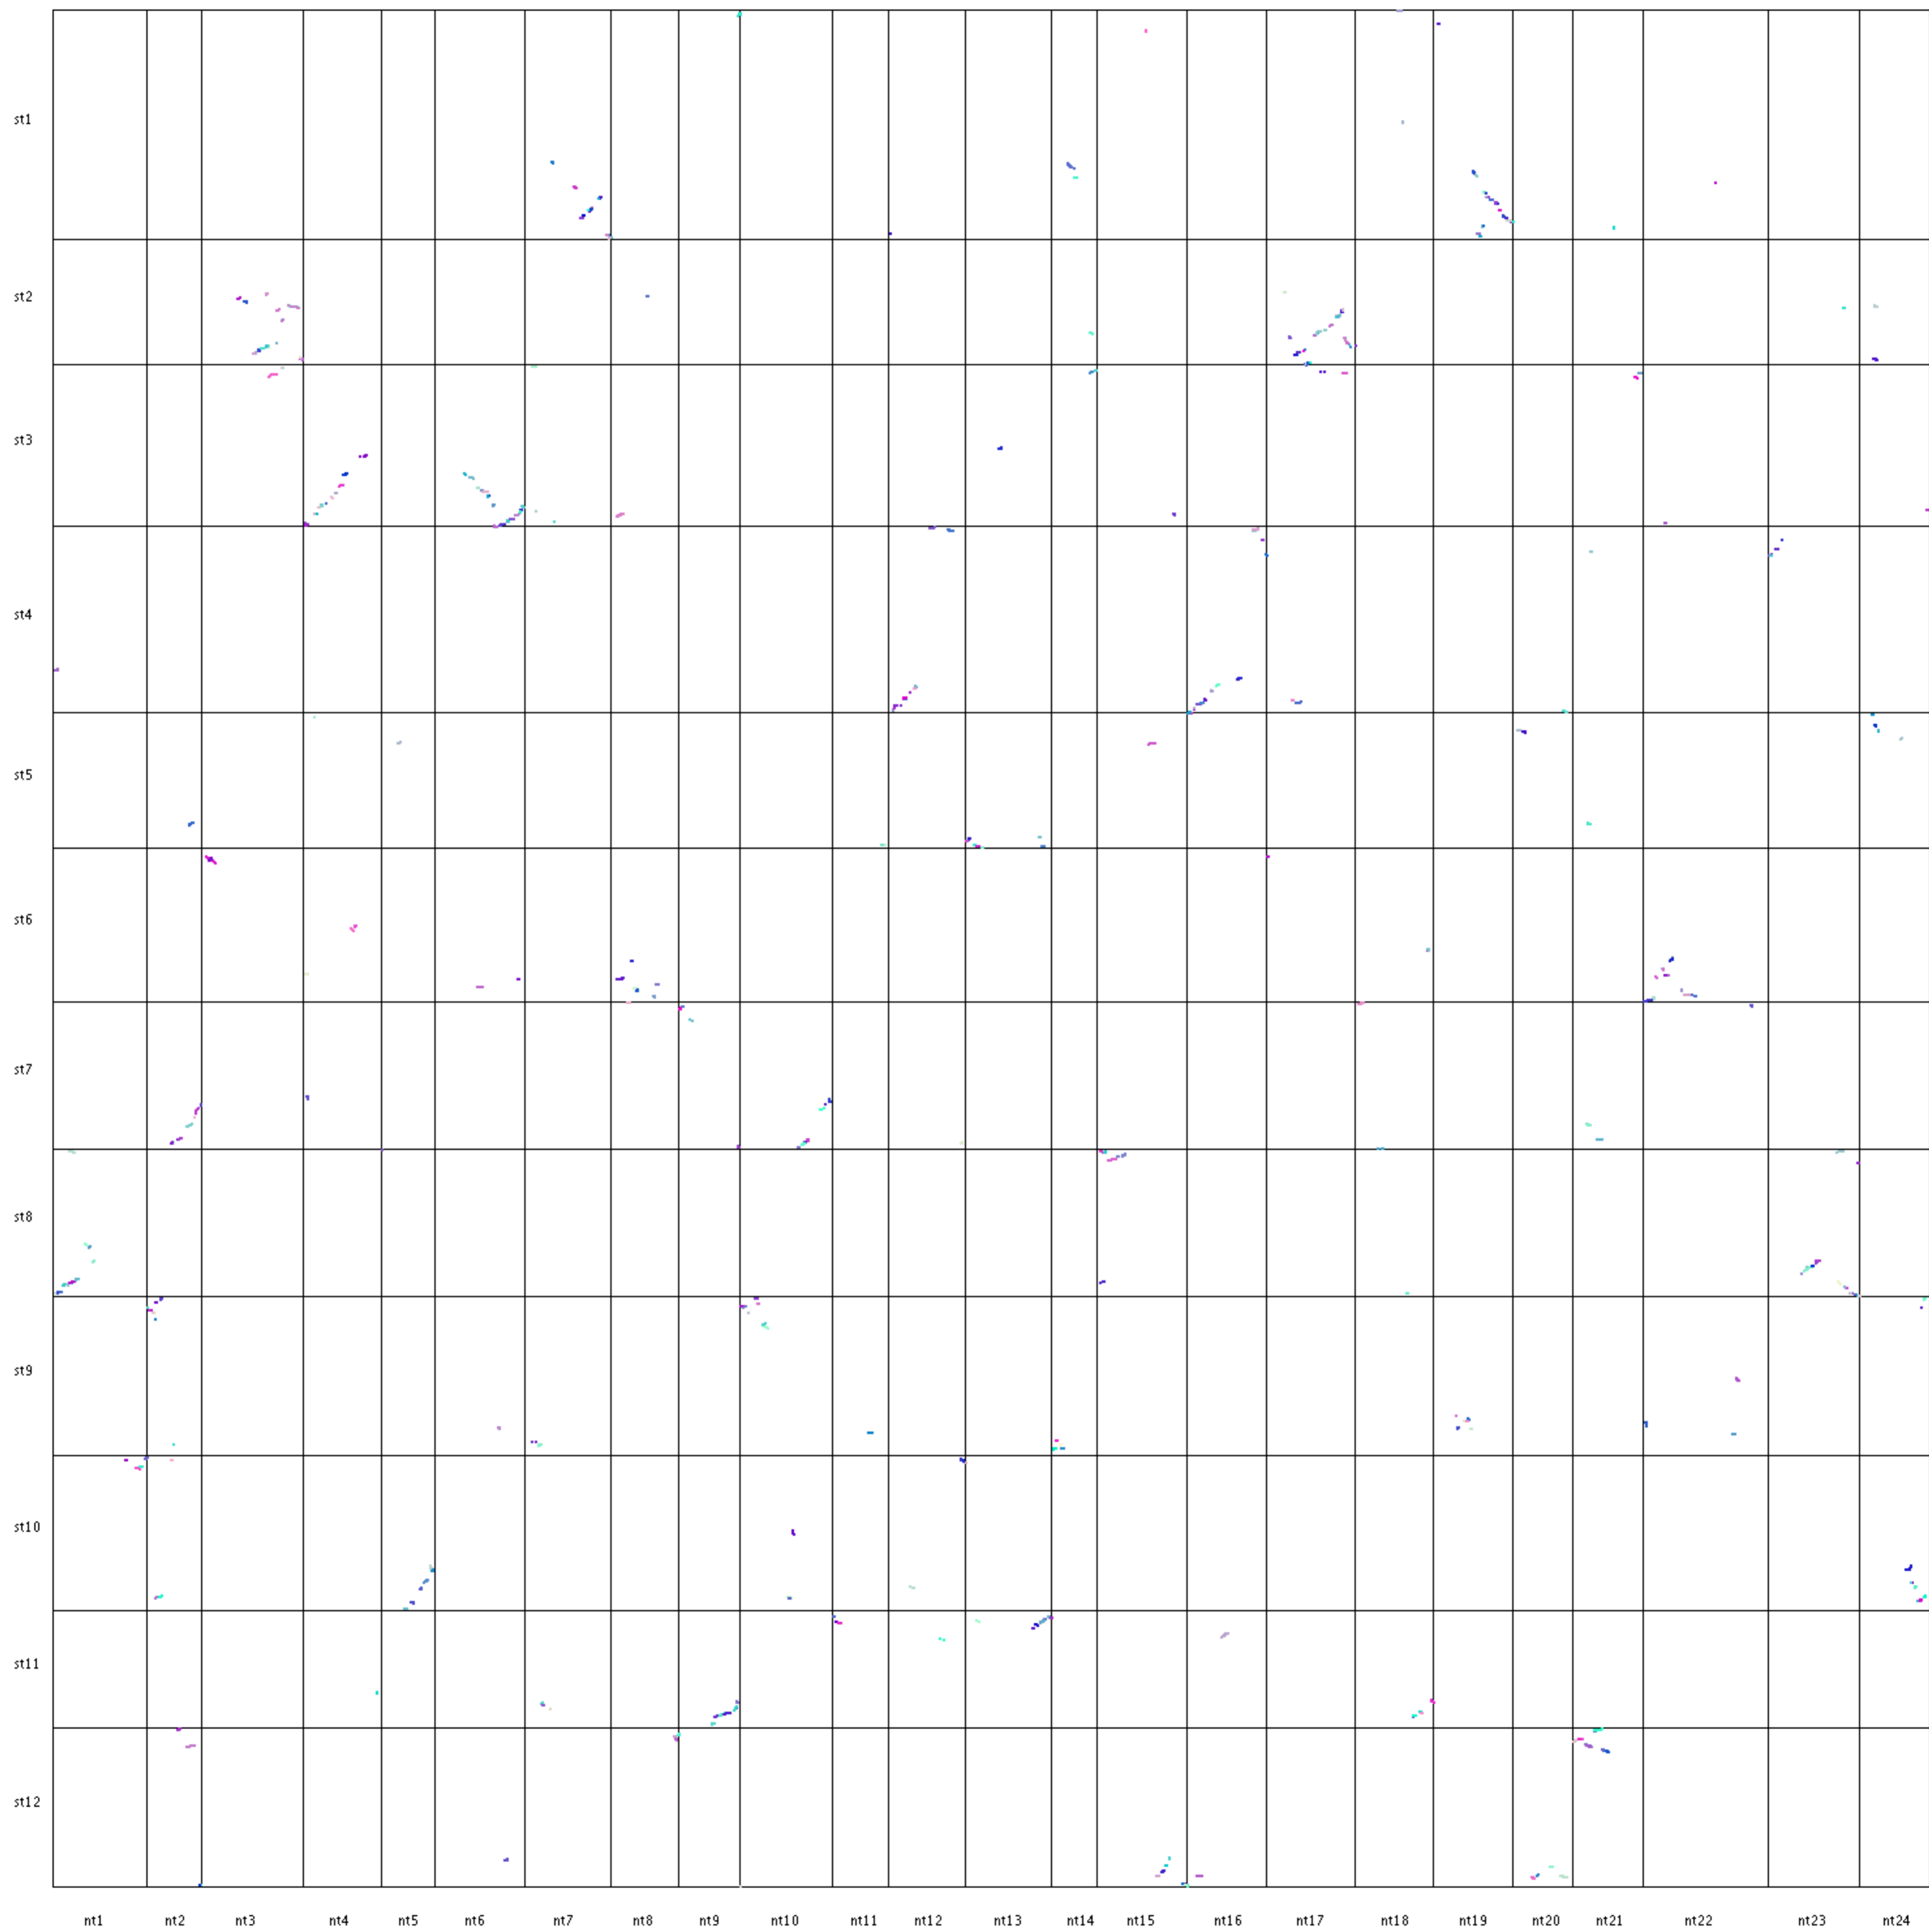



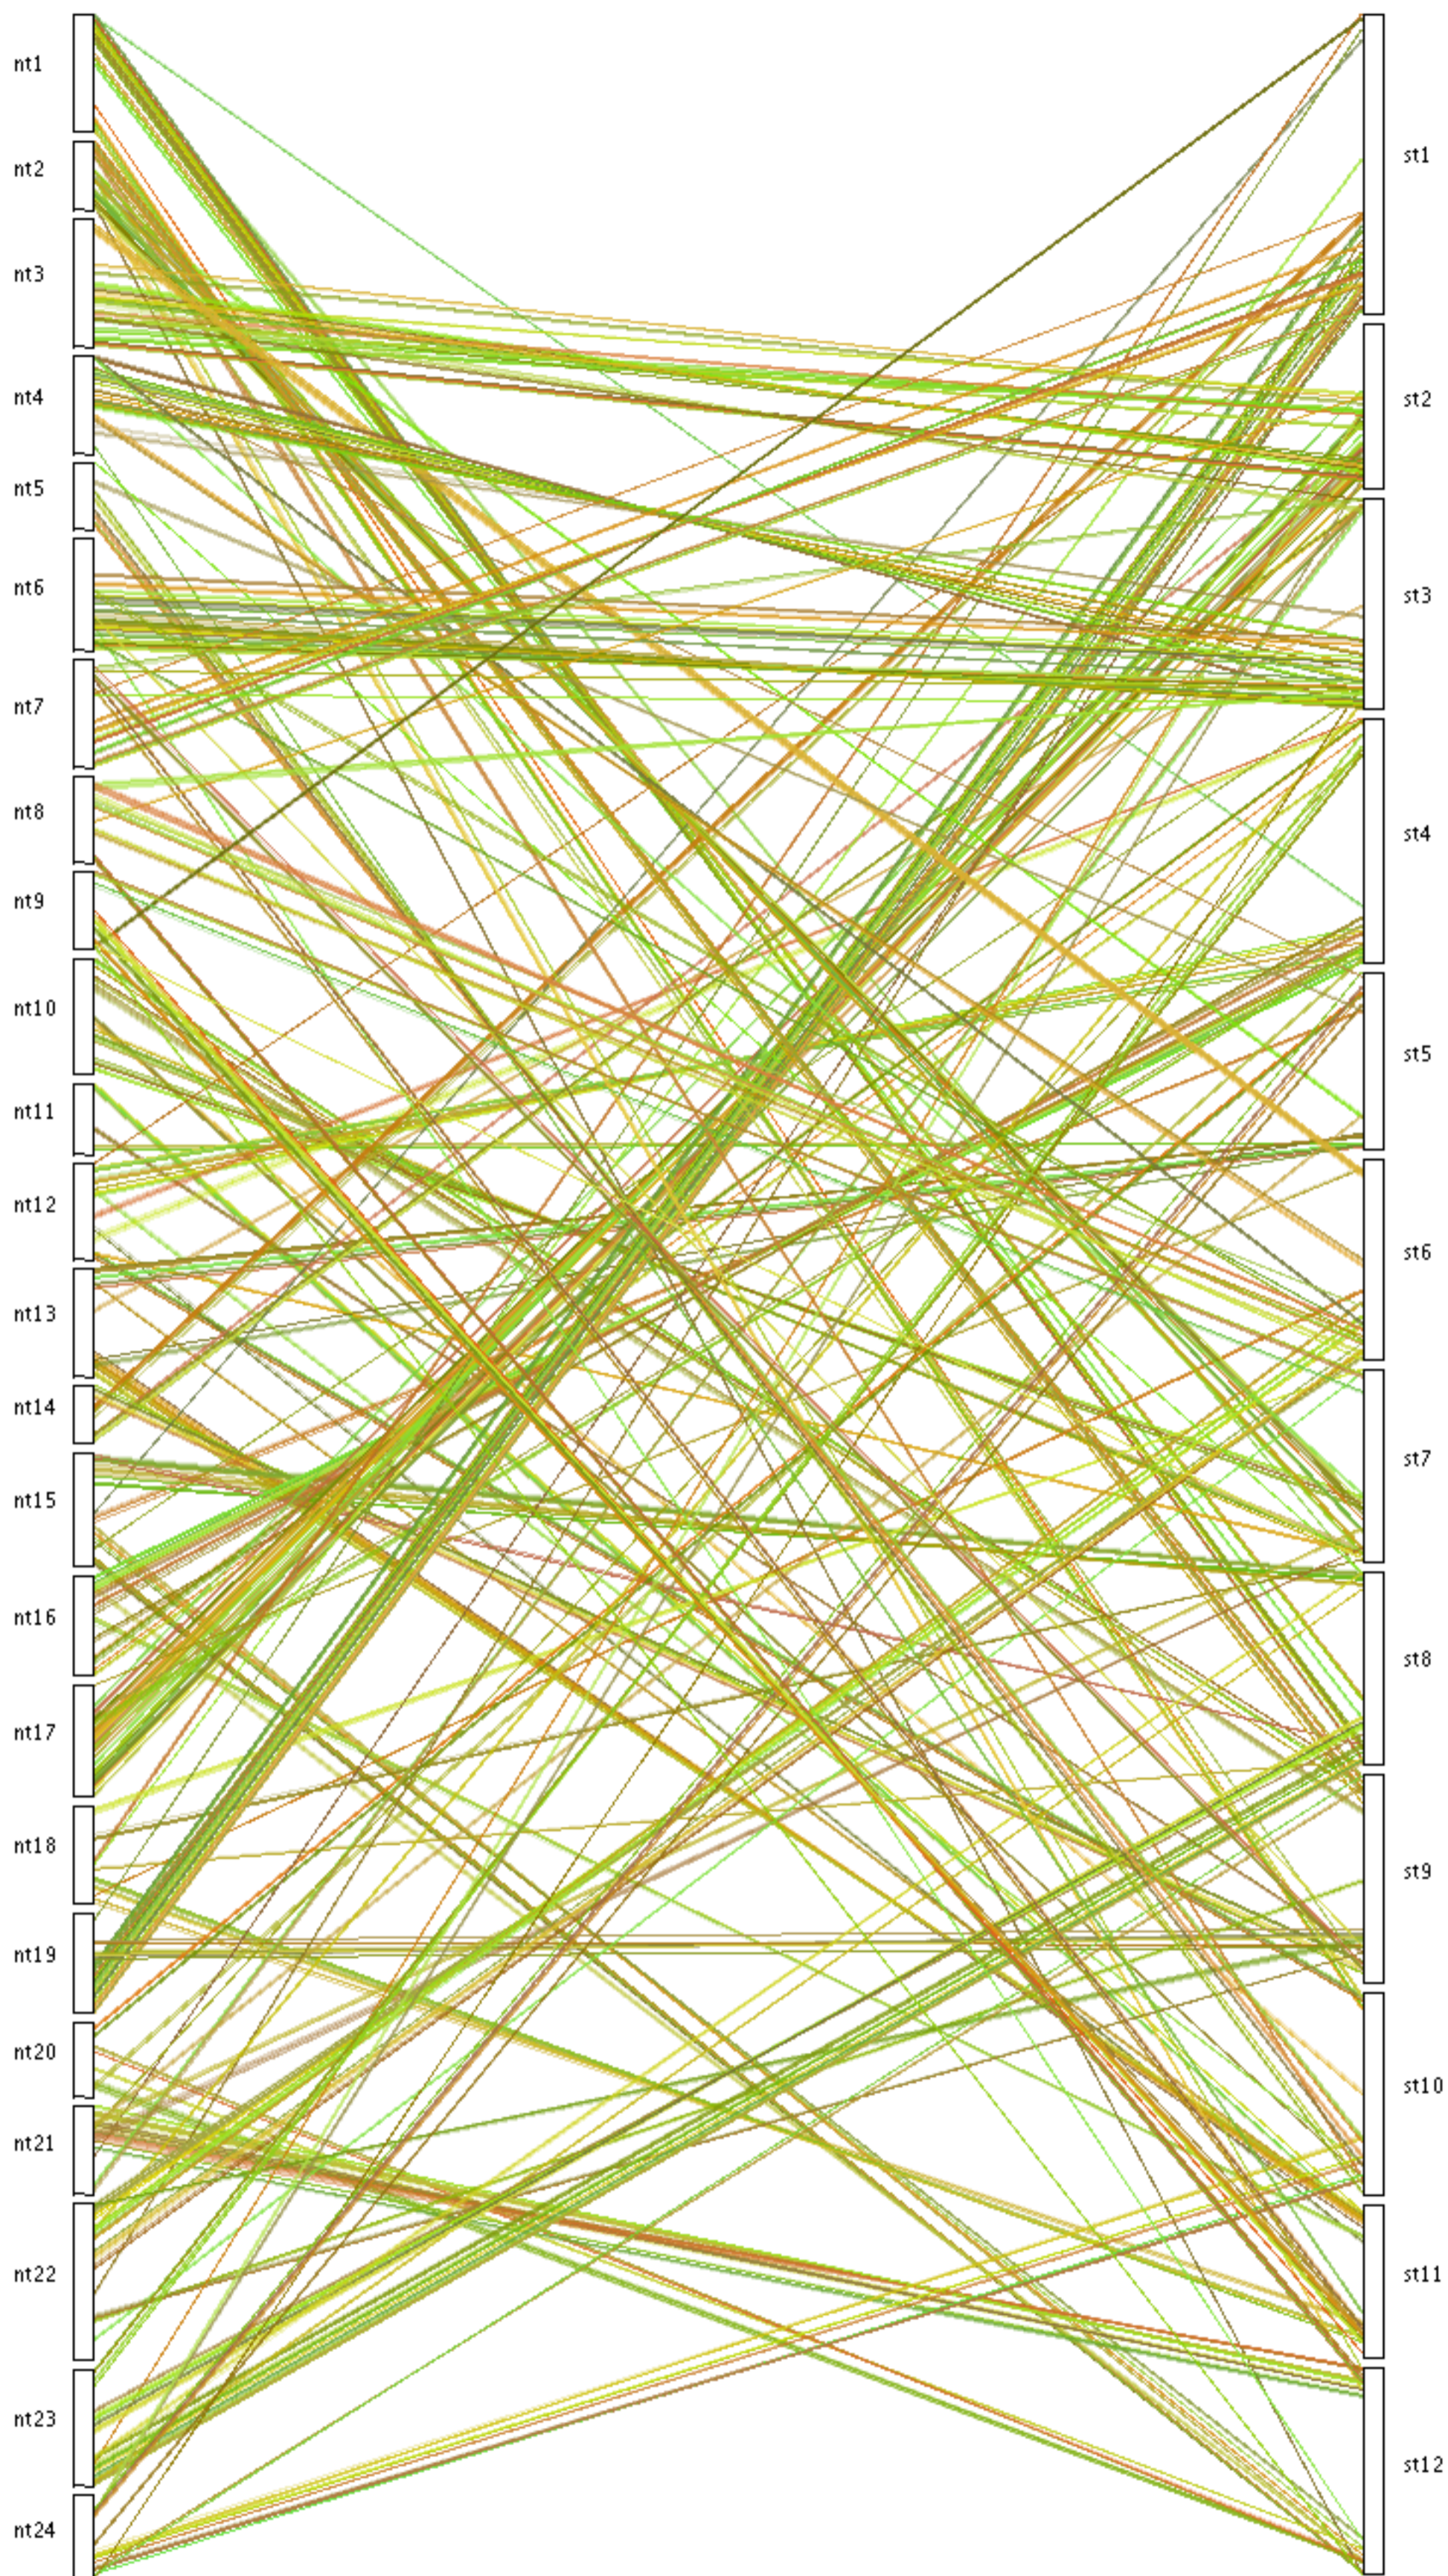

Supplement: ncomms4833-s10.pdf [file ncomms4833-s10.pdf]
